# Supplementary material for: Annotations of Recurrent Structural Variant Events in Pan-cancer Whole Genome Data for Precision Medicine
Source: Research Square preprint supplement (doi:10.21203/rs.3.rs-136297/v1), 2021-01-04
Supplement: Supplementary file 1 [file e247e41740b1bbfcf65344a6.xlsx]

## Sheet: SV_recurrent_genes
Supplementary Table 1: The detailed results of SV calls. For each gene with SV, occurred events are summarized. The numbers of mutated samples are counted with respect to tumor types.
EVENT	GENE	#Samples with EVENT	#Samples with EVENT across tumors
EXON_SKIP	'FHIT	235	Eso-AdenoCA(72),Stomach-AdenoCA(37),Panc-AdenoCA(25),ColoRect-AdenoCA(23),Liver-HCC(13),Ovary-AdenoCA(11),Head-SCC(9),Lymph-BNHL(8),Bladder-TCC(7),Breast-AdenoCA(7),Biliary-AdenoCA(5),Prost-AdenoCA(5),Bone-Osteosarc(4),Cervix-SCC(3),Lung-AdenoCA(2),Skin-Melanoma(2),Lung-SCC(1),Uterus-AdenoCA(1)
EXON_SKIP	'MACROD2	196	Eso-AdenoCA(40),Liver-HCC(23),ColoRect-AdenoCA(21),Stomach-AdenoCA(21),Breast-AdenoCA(15),Panc-AdenoCA(12),Ovary-AdenoCA(9),Prost-AdenoCA(8),Panc-Endocrine(7),Head-SCC(6),Uterus-AdenoCA(6),Kidney-ChRCC(5),Lung-SCC(5),Biliary-AdenoCA(4),Kidney-RCC(4),Bladder-TCC(3),Skin-Melanoma(3),Bone-Osteosarc(2),CNS-Medullo(1),Lung-AdenoCA(1)
FUSION_3	'ERG	179	Prost-AdenoCA(163),Bone-Osteosarc(5),Breast-LobularCA(3),Skin-Melanoma(3),Kidney-RCC(2),Breast-AdenoCA(1),Liver-HCC(1),Stomach-AdenoCA(1)
FUSION_5	'TMPRSS2	162	Prost-AdenoCA(158),Lung-AdenoCA(2),Eso-AdenoCA(1),Stomach-AdenoCA(1)
EXON_SKIP	'WWOX	147	Eso-AdenoCA(54),Panc-AdenoCA(27),Stomach-AdenoCA(26),ColoRect-AdenoCA(8),Breast-AdenoCA(5),Liver-HCC(5),Biliary-AdenoCA(4),Ovary-AdenoCA(4),Head-SCC(2),Lymph-BNHL(2),Skin-Melanoma(2),Bladder-TCC(1),Bone-Osteosarc(1),CNS-Medullo(1),Cervix-AdenoCA(1),Kidney-ChRCC(1),Kidney-RCC(1),Lung-AdenoCA(1),Prost-AdenoCA(1)
EXON_SKIP	'LRP1B	139	Liver-HCC(35),Lung-SCC(15),Ovary-AdenoCA(14),Eso-AdenoCA(13),Bladder-TCC(8),Head-SCC(7),Breast-AdenoCA(6),Uterus-AdenoCA(6),Bone-Osteosarc(5),Panc-AdenoCA(5),Cervix-SCC(4),Stomach-AdenoCA(4),Kidney-RCC(3),Lung-AdenoCA(3),Skin-Melanoma(3),Prost-AdenoCA(2),SoftTissue-Leiomyo(2),Biliary-AdenoCA(1),CNS-GBM(1),ColoRect-AdenoCA(1),SoftTissue-Liposarc(1)
EXON_SKIP	'PTPRD	122	Panc-AdenoCA(27),Eso-AdenoCA(15),Stomach-AdenoCA(13),Prost-AdenoCA(10),Head-SCC(9),Breast-AdenoCA(7),Lung-AdenoCA(7),Liver-HCC(6),Panc-Endocrine(6),Skin-Melanoma(4),Kidney-ChRCC(3),Bone-Osteosarc(2),Cervix-SCC(2),Kidney-RCC(2),Lung-SCC(2),Ovary-AdenoCA(2),Bladder-TCC(1),Bone-Epith(1),CNS-GBM(1),SoftTissue-Leiomyo(1),Uterus-AdenoCA(1)
DISRUPTION	'EYS	119	Breast-AdenoCA(17),Panc-AdenoCA(17),Liver-HCC(16),Skin-Melanoma(14),Prost-AdenoCA(12),Bone-Osteosarc(8),Ovary-AdenoCA(8),Head-SCC(5),Stomach-AdenoCA(5),Eso-AdenoCA(3),Lung-SCC(3),Uterus-AdenoCA(2),Biliary-AdenoCA(1),Breast-LobularCA(1),CNS-GBM(1),CNS-Medullo(1),Cervix-SCC(1),Lung-AdenoCA(1),Lymph-BNHL(1),SoftTissue-Leiomyo(1),SoftTissue-Liposarc(1)
EXON_SKIP	'NAALADL2	114	Eso-AdenoCA(23),Panc-AdenoCA(16),Stomach-AdenoCA(14),ColoRect-AdenoCA(13),Breast-AdenoCA(10),Liver-HCC(7),Bone-Osteosarc(6),Head-SCC(6),Ovary-AdenoCA(5),Lung-SCC(3),Kidney-ChRCC(2),Skin-Melanoma(2),Bladder-TCC(1),CNS-GBM(1),Cervix-SCC(1),Kidney-RCC(1),Prost-AdenoCA(1),SoftTissue-Leiomyo(1),Uterus-AdenoCA(1)
EXON_SKIP	'CCSER1	112	Panc-AdenoCA(27),Eso-AdenoCA(24),Stomach-AdenoCA(14),ColoRect-AdenoCA(11),Prost-AdenoCA(7),Breast-AdenoCA(5),Head-SCC(5),Lung-SCC(5),Bladder-TCC(3),Ovary-AdenoCA(3),Skin-Melanoma(2),Uterus-AdenoCA(2),Cervix-SCC(1),Kidney-RCC(1),Liver-HCC(1),Lymph-BNHL(1)
EXON_SKIP	'PDE4D	108	Eso-AdenoCA(26),Stomach-AdenoCA(16),ColoRect-AdenoCA(8),Head-SCC(7),Lung-SCC(7),Prost-AdenoCA(7),Breast-AdenoCA(6),Liver-HCC(6),Ovary-AdenoCA(6),Skin-Melanoma(3),Uterus-AdenoCA(3),Bladder-TCC(2),Kidney-ChRCC(2),Lung-AdenoCA(2),Panc-AdenoCA(2),Biliary-AdenoCA(1),Cervix-SCC(1),Lymph-BNHL(1),Panc-Endocrine(1),SoftTissue-Liposarc(1)
EXON_SKIP	'PARK2	97	Eso-AdenoCA(19),Panc-AdenoCA(19),ColoRect-AdenoCA(15),Stomach-AdenoCA(13),Liver-HCC(6),Uterus-AdenoCA(5),Lung-SCC(4),Biliary-AdenoCA(3),Breast-AdenoCA(3),CNS-GBM(2),Lung-AdenoCA(2),Ovary-AdenoCA(2),Skin-Melanoma(2),Bladder-TCC(1),Bone-Osteosarc(1)
DISRUPTION	'RP11-145E5.5	82	Panc-AdenoCA(25),Skin-Melanoma(11),CNS-GBM(7),Eso-AdenoCA(6),Lymph-BNHL(4),Kidney-RCC(3),Liver-HCC(3),Panc-Endocrine(3),SoftTissue-Liposarc(3),Breast-AdenoCA(2),Head-SCC(2),Lung-AdenoCA(2),Lung-SCC(2),Prost-AdenoCA(2),Stomach-AdenoCA(2),Biliary-AdenoCA(1),Bone-Epith(1),Bone-Osteosarc(1),Ovary-AdenoCA(1),Uterus-AdenoCA(1)
FUSION_3	'CDKN2B-AS1	79	Liver-HCC(19),Lymph-BNHL(13),Panc-AdenoCA(11),Skin-Melanoma(9),Eso-AdenoCA(7),SoftTissue-Leiomyo(4),Bladder-TCC(3),Bone-Epith(2),Bone-Osteosarc(2),CNS-Oligo(2),Stomach-AdenoCA(2),Breast-AdenoCA(1),Head-SCC(1),Lung-AdenoCA(1),NA(1),Panc-Endocrine(1)
DISRUPTION	'PDE4D	76	Prost-AdenoCA(18),Breast-AdenoCA(9),Panc-AdenoCA(8),Eso-AdenoCA(6),Liver-HCC(5),Lung-AdenoCA(4),Ovary-AdenoCA(4),Stomach-AdenoCA(4),ColoRect-AdenoCA(3),Bladder-TCC(2),Bone-Osteosarc(2),SoftTissue-Liposarc(2),Uterus-AdenoCA(2),Biliary-AdenoCA(1),Bone-Epith(1),Breast-LobularCA(1),Kidney-RCC(1),Lymph-BNHL(1),Panc-Endocrine(1),Skin-Melanoma(1)
FUSION_3	'BRAF	75	CNS-PiloAstro(62),Panc-AdenoCA(5),Thy-AdenoCA(4),Eso-AdenoCA(1),Ovary-AdenoCA(1),Prost-AdenoCA(1),Skin-Melanoma(1)
FUSION_3	'TMPRSS2	74	Prost-AdenoCA(71),Stomach-AdenoCA(2),SoftTissue-Liposarc(1)
DISRUPTION	'SHANK2	71	Breast-AdenoCA(16),Skin-Melanoma(11),Liver-HCC(8),Head-SCC(7),Breast-LobularCA(5),Ovary-AdenoCA(4),Stomach-AdenoCA(4),Eso-AdenoCA(2),Lung-SCC(2),Panc-Endocrine(2),Prost-AdenoCA(2),SoftTissue-Liposarc(2),Bladder-TCC(1),Bone-Epith(1),CNS-GBM(1),Cervix-SCC(1),Kidney-RCC(1),Panc-AdenoCA(1)
EXON_SKIP	'IMMP2L	71	Eso-AdenoCA(20),ColoRect-AdenoCA(9),Liver-HCC(8),Head-SCC(7),Stomach-AdenoCA(7),Lymph-BNHL(4),Panc-AdenoCA(4),Ovary-AdenoCA(3),Breast-AdenoCA(2),Lung-SCC(2),Biliary-AdenoCA(1),Bone-Epith(1),Bone-Osteosarc(1),Prost-AdenoCA(1),Uterus-AdenoCA(1)
FUSION_3	'TENM4	70	Breast-AdenoCA(30),Skin-Melanoma(27),Ovary-AdenoCA(4),SoftTissue-Liposarc(3),Breast-LobularCA(2),Lung-SCC(1),Lymph-BNHL(1),Stomach-AdenoCA(1),Uterus-AdenoCA(1)
EXON_SKIP	'CSMD1	69	Liver-HCC(16),Breast-AdenoCA(15),Lung-SCC(11),Head-SCC(9),CNS-GBM(3),Bladder-TCC(2),Ovary-AdenoCA(2),Panc-AdenoCA(2),Skin-Melanoma(2),Biliary-AdenoCA(1),Bone-Osteosarc(1),Breast-LobularCA(1),Eso-AdenoCA(1),Lung-AdenoCA(1),Prost-AdenoCA(1),Stomach-AdenoCA(1)
DISRUPTION	'PTEN	68	Prost-AdenoCA(38),Breast-AdenoCA(4),Panc-AdenoCA(4),Skin-Melanoma(4),Liver-HCC(3),Ovary-AdenoCA(3),Bone-Osteosarc(2),Lung-SCC(2),Biliary-AdenoCA(1),CNS-Medullo(1),Cervix-AdenoCA(1),Eso-AdenoCA(1),Head-SCC(1),Kidney-ChRCC(1),Kidney-RCC(1),Uterus-AdenoCA(1)
DISRUPTION	'CSMD1	67	Breast-AdenoCA(13),Prost-AdenoCA(11),Liver-HCC(6),Panc-AdenoCA(6),Lung-AdenoCA(5),Eso-AdenoCA(4),Ovary-AdenoCA(4),Lung-SCC(3),SoftTissue-Leiomyo(3),SoftTissue-Liposarc(3),Stomach-AdenoCA(3),Head-SCC(2),Bone-Osteosarc(1),CNS-Medullo(1),Lymph-BNHL(1),Skin-Melanoma(1)
DISRUPTION	'MACROD2	67	Ovary-AdenoCA(15),Breast-AdenoCA(11),Stomach-AdenoCA(7),Panc-AdenoCA(6),Eso-AdenoCA(5),Bone-Osteosarc(3),Bladder-TCC(2),ColoRect-AdenoCA(2),Liver-HCC(2),Lung-SCC(2),SoftTissue-Leiomyo(2),SoftTissue-Liposarc(2),Uterus-AdenoCA(2),Breast-LobularCA(1),CNS-GBM(1),CNS-Medullo(1),Head-SCC(1),Prost-AdenoCA(1),Skin-Melanoma(1)
DISRUPTION	'PTPRD	67	Skin-Melanoma(10),Panc-AdenoCA(9),Liver-HCC(5),Lymph-BNHL(5),Stomach-AdenoCA(5),Bone-Osteosarc(4),Breast-AdenoCA(4),Ovary-AdenoCA(4),Prost-AdenoCA(4),Eso-AdenoCA(3),SoftTissue-Liposarc(3),Lung-SCC(2),Biliary-AdenoCA(1),Bladder-TCC(1),CNS-GBM(1),CNS-Medullo(1),ColoRect-AdenoCA(1),Lung-AdenoCA(1),Panc-Endocrine(1),SoftTissue-Leiomyo(1),Uterus-AdenoCA(1)
FUSION_3	'SHANK2	67	Breast-AdenoCA(17),Head-SCC(9),Skin-Melanoma(9),Liver-HCC(6),Ovary-AdenoCA(6),Kidney-RCC(5),Breast-LobularCA(3),Bladder-TCC(2),CNS-GBM(2),Prost-AdenoCA(2),Eso-AdenoCA(1),Lung-AdenoCA(1),Lung-SCC(1),Panc-AdenoCA(1),SoftTissue-Liposarc(1),Stomach-AdenoCA(1)
FUSION_5	'TENM4	65	Breast-AdenoCA(33),Skin-Melanoma(21),Eso-AdenoCA(2),Liver-HCC(2),Breast-LobularCA(1),Head-SCC(1),Lung-SCC(1),Ovary-AdenoCA(1),Panc-AdenoCA(1),SoftTissue-Liposarc(1),Stomach-AdenoCA(1)
DISRUPTION	'FHIT	62	Eso-AdenoCA(9),Stomach-AdenoCA(7),Breast-AdenoCA(6),Liver-HCC(5),Ovary-AdenoCA(5),Skin-Melanoma(5),Panc-AdenoCA(4),Prost-AdenoCA(4),Kidney-RCC(3),Biliary-AdenoCA(2),ColoRect-AdenoCA(2),Head-SCC(2),Uterus-AdenoCA(2),Bone-Osteosarc(1),Breast-LobularCA(1),Lung-AdenoCA(1),Lung-SCC(1),Lymph-BNHL(1),SoftTissue-Liposarc(1)
DISRUPTION	'LRP1B	62	Prost-AdenoCA(16),Ovary-AdenoCA(6),Breast-AdenoCA(5),Liver-HCC(5),Skin-Melanoma(5),Lung-SCC(4),Bone-Osteosarc(3),Panc-AdenoCA(3),ColoRect-AdenoCA(2),Eso-AdenoCA(2),Lung-AdenoCA(2),SoftTissue-Leiomyo(2),SoftTissue-Liposarc(2),Bladder-TCC(1),CNS-Medullo(1),Head-SCC(1),Lymph-BNHL(1),Uterus-AdenoCA(1)
EXON_SKIP	'LSAMP	62	Ovary-AdenoCA(18),Bone-Osteosarc(10),Skin-Melanoma(6),Panc-AdenoCA(5),Eso-AdenoCA(3),SoftTissue-Liposarc(3),Breast-AdenoCA(2),CNS-GBM(2),Lymph-BNHL(2),Panc-Endocrine(2),Uterus-AdenoCA(2),Bladder-TCC(1),Bone-Benign(1),ColoRect-AdenoCA(1),Kidney-RCC(1),Liver-HCC(1),Lung-SCC(1),Prost-AdenoCA(1)
FUSION_5	'RP11-145E5.5	62	Liver-HCC(14),Lymph-BNHL(10),Panc-AdenoCA(8),Eso-AdenoCA(5),Skin-Melanoma(5),Panc-Endocrine(3),SoftTissue-Leiomyo(3),Bladder-TCC(2),Bone-Osteosarc(2),Stomach-AdenoCA(2),Biliary-AdenoCA(1),Bone-Epith(1),Breast-AdenoCA(1),CNS-Oligo(1),Head-SCC(1),Lung-AdenoCA(1),Lung-SCC(1),NA(1)
DISRUPTION	'NAALADL2	61	Ovary-AdenoCA(12),Breast-AdenoCA(10),Lung-SCC(7),Eso-AdenoCA(6),Panc-AdenoCA(5),Prost-AdenoCA(5),Uterus-AdenoCA(4),Liver-HCC(3),SoftTissue-Leiomyo(3),Bladder-TCC(1),Breast-LobularCA(1),CNS-GBM(1),ColoRect-AdenoCA(1),Skin-Melanoma(1),Stomach-AdenoCA(1)
DISRUPTION	'PCDH15	61	Prost-AdenoCA(19),Breast-AdenoCA(9),Ovary-AdenoCA(6),Panc-AdenoCA(5),Head-SCC(3),Lung-SCC(3),Lymph-BNHL(3),Stomach-AdenoCA(3),Bone-Osteosarc(2),Liver-HCC(2),Biliary-AdenoCA(1),Bladder-TCC(1),ColoRect-AdenoCA(1),Eso-AdenoCA(1),Kidney-RCC(1),Skin-Melanoma(1)
EXON_SKIP	'GMDS	61	Eso-AdenoCA(23),Stomach-AdenoCA(15),ColoRect-AdenoCA(10),Liver-HCC(5),Panc-AdenoCA(3),Skin-Melanoma(2),Breast-AdenoCA(1),Lung-AdenoCA(1),Ovary-AdenoCA(1)
DISRUPTION	'CSMD3	60	Breast-AdenoCA(10),Prost-AdenoCA(8),Liver-HCC(6),Panc-AdenoCA(6),Bone-Osteosarc(4),Ovary-AdenoCA(4),Lung-AdenoCA(3),Eso-AdenoCA(2),Head-SCC(2),Lung-SCC(2),Skin-Melanoma(2),SoftTissue-Liposarc(2),Stomach-AdenoCA(2),Uterus-AdenoCA(2),Breast-LobularCA(1),ColoRect-AdenoCA(1),Kidney-RCC(1),Lymph-BNHL(1),Panc-Endocrine(1)
FUSION_5	'KIAA1549	60	CNS-PiloAstro(57),Eso-AdenoCA(1),Liver-HCC(1),Uterus-AdenoCA(1)
DISRUPTION	'ROBO2	59	Prost-AdenoCA(19),Breast-AdenoCA(9),Ovary-AdenoCA(4),Skin-Melanoma(4),Bone-Osteosarc(3),Kidney-RCC(3),Stomach-AdenoCA(3),Biliary-AdenoCA(2),Lung-SCC(2),Panc-AdenoCA(2),SoftTissue-Liposarc(2),Eso-AdenoCA(1),Liver-HCC(1),Lung-AdenoCA(1),Lymph-BNHL(1),SoftTissue-Leiomyo(1),Uterus-AdenoCA(1)
DISRUPTION	'DLG2	58	Skin-Melanoma(10),Breast-AdenoCA(9),Liver-HCC(8),Ovary-AdenoCA(5),Panc-AdenoCA(5),Eso-AdenoCA(4),Prost-AdenoCA(4),SoftTissue-Liposarc(2),Stomach-AdenoCA(2),Biliary-AdenoCA(1),Bone-Osteosarc(1),CNS-GBM(1),Cervix-SCC(1),Head-SCC(1),Lung-AdenoCA(1),Lung-SCC(1),Panc-Endocrine(1),Uterus-AdenoCA(1)
DISRUPTION	'IMMP2L	58	Eso-AdenoCA(10),Prost-AdenoCA(8),Stomach-AdenoCA(7),Breast-AdenoCA(4),Liver-HCC(4),Ovary-AdenoCA(4),ColoRect-AdenoCA(3),Lymph-BNHL(3),Bone-Osteosarc(2),Head-SCC(2),Kidney-RCC(2),Skin-Melanoma(2),Bladder-TCC(1),Breast-LobularCA(1),CNS-Medullo(1),Lung-SCC(1),Panc-AdenoCA(1),Panc-Endocrine(1),SoftTissue-Liposarc(1)
FUSION_3	'RUNX1	58	Prost-AdenoCA(13),Breast-AdenoCA(11),Panc-AdenoCA(8),Myeloid-AML(4),Bladder-TCC(3),Kidney-RCC(3),Bone-Osteosarc(2),Eso-AdenoCA(2),Ovary-AdenoCA(2),Skin-Melanoma(2),Stomach-AdenoCA(2),CNS-Medullo(1),Cervix-SCC(1),Liver-HCC(1),Myeloid-MDS(1),SoftTissue-Liposarc(1),Uterus-AdenoCA(1)
DISRUPTION	'CNTNAP2	57	Skin-Melanoma(7),Liver-HCC(6),Ovary-AdenoCA(6),Panc-AdenoCA(5),Prost-AdenoCA(5),Breast-AdenoCA(4),Bone-Osteosarc(3),Eso-AdenoCA(3),SoftTissue-Liposarc(3),Biliary-AdenoCA(2),Head-SCC(2),Lung-AdenoCA(2),Lung-SCC(2),Stomach-AdenoCA(2),CNS-GBM(1),CNS-Medullo(1),CNS-Oligo(1),SoftTissue-Leiomyo(1),Thy-AdenoCA(1)
DISRUPTION	'WWOX	57	Eso-AdenoCA(13),Panc-AdenoCA(10),Breast-AdenoCA(7),Liver-HCC(5),Bladder-TCC(4),Ovary-AdenoCA(4),Head-SCC(3),Prost-AdenoCA(3),Biliary-AdenoCA(2),CNS-GBM(1),Kidney-RCC(1),Skin-Melanoma(1),SoftTissue-Leiomyo(1),Stomach-AdenoCA(1),Uterus-AdenoCA(1)
FUSION_5	'SHANK2	57	Skin-Melanoma(14),Breast-AdenoCA(10),Liver-HCC(6),Prost-AdenoCA(5),Kidney-RCC(4),Stomach-AdenoCA(3),Bladder-TCC(2),Breast-LobularCA(2),Eso-AdenoCA(2),Head-SCC(2),Ovary-AdenoCA(2),Bone-Epith(1),CNS-GBM(1),Lung-AdenoCA(1),Lung-SCC(1),SoftTissue-Liposarc(1)
DISRUPTION	'CADM2	56	Breast-AdenoCA(12),Liver-HCC(5),Ovary-AdenoCA(5),Bone-Osteosarc(4),Kidney-RCC(4),Prost-AdenoCA(4),Eso-AdenoCA(3),Skin-Melanoma(3),Biliary-AdenoCA(2),CNS-Medullo(2),Lung-SCC(2),Lymph-BNHL(2),Panc-AdenoCA(2),Bladder-TCC(1),ColoRect-AdenoCA(1),Head-SCC(1),Lung-AdenoCA(1),SoftTissue-Leiomyo(1),Uterus-AdenoCA(1)
DISRUPTION	'CCSER1	56	Prost-AdenoCA(14),Breast-AdenoCA(9),Bone-Osteosarc(4),Eso-AdenoCA(4),Lung-SCC(4),Panc-AdenoCA(3),CNS-Medullo(2),ColoRect-AdenoCA(2),Liver-HCC(2),Stomach-AdenoCA(2),Uterus-AdenoCA(2),Bladder-TCC(1),CNS-GBM(1),Head-SCC(1),Lung-AdenoCA(1),Ovary-AdenoCA(1),Panc-Endocrine(1),Skin-Melanoma(1),SoftTissue-Liposarc(1)
EXON_SKIP	'PARD3B	56	Eso-AdenoCA(16),Liver-HCC(7),Panc-AdenoCA(6),Stomach-AdenoCA(6),Breast-AdenoCA(4),ColoRect-AdenoCA(4),Head-SCC(3),Bladder-TCC(2),Bone-Osteosarc(1),Cervix-SCC(1),Kidney-RCC(1),Lung-SCC(1),Lymph-BNHL(1),Prost-AdenoCA(1),SoftTissue-Leiomyo(1),Uterus-AdenoCA(1)
DISRUPTION	'PVT1	55	Breast-AdenoCA(15),Prost-AdenoCA(9),Eso-AdenoCA(5),Lung-SCC(4),Uterus-AdenoCA(4),CNS-Medullo(3),Lymph-BNHL(3),Ovary-AdenoCA(3),Head-SCC(2),Panc-AdenoCA(2),Stomach-AdenoCA(2),Biliary-AdenoCA(1),Skin-Melanoma(1),SoftTissue-Liposarc(1)
EXON_SKIP	'RBFOX1	55	ColoRect-AdenoCA(24),Panc-AdenoCA(7),Skin-Melanoma(4),Stomach-AdenoCA(4),Eso-AdenoCA(3),Bladder-TCC(2),Breast-AdenoCA(2),Kidney-RCC(2),Lung-SCC(2),Bone-Osteosarc(1),Head-SCC(1),Kidney-ChRCC(1),Liver-HCC(1),Panc-Endocrine(1)
FUSION_3	'DLG2	55	Breast-AdenoCA(17),Skin-Melanoma(16),Prost-AdenoCA(5),Liver-HCC(4),Panc-AdenoCA(3),CNS-PiloAstro(2),Ovary-AdenoCA(2),Bone-Osteosarc(1),CNS-GBM(1),Eso-AdenoCA(1),Head-SCC(1),Myeloid-AML(1),Uterus-AdenoCA(1)
FUSION_3	'MGAT4C	55	SoftTissue-Liposarc(32),Bone-Osteosarc(8),Skin-Melanoma(7),Prost-AdenoCA(4),Biliary-AdenoCA(1),Breast-AdenoCA(1),Liver-HCC(1),Ovary-AdenoCA(1)
DISRUPTION	'SNTG1	53	Breast-AdenoCA(7),Panc-AdenoCA(7),Prost-AdenoCA(7),Liver-HCC(6),Ovary-AdenoCA(5),Skin-Melanoma(4),Bone-Osteosarc(3),ColoRect-AdenoCA(2),Lung-AdenoCA(2),Lymph-BNHL(2),Biliary-AdenoCA(1),Bladder-TCC(1),CNS-GBM(1),Eso-AdenoCA(1),Kidney-ChRCC(1),Lung-SCC(1),Stomach-AdenoCA(1),Uterus-AdenoCA(1)
DISRUPTION	'ASIC2	52	Breast-AdenoCA(14),Eso-AdenoCA(7),Liver-HCC(6),Panc-AdenoCA(6),ColoRect-AdenoCA(3),Stomach-AdenoCA(3),Bladder-TCC(2),Bone-Osteosarc(2),Lung-SCC(2),Skin-Melanoma(2),Breast-LobularCA(1),CNS-GBM(1),Lymph-BNHL(1),Ovary-AdenoCA(1),Prost-AdenoCA(1)
DISRUPTION	'RP11-179A16.1	52	Breast-AdenoCA(12),Skin-Melanoma(9),Prost-AdenoCA(6),Ovary-AdenoCA(5),Liver-HCC(4),Eso-AdenoCA(3),Panc-AdenoCA(3),CNS-GBM(2),Head-SCC(2),Bladder-TCC(1),Bone-Osteosarc(1),CNS-Oligo(1),Kidney-ChRCC(1),Panc-Endocrine(1),Stomach-AdenoCA(1)
DISRUPTION	'TMPRSS2	52	Prost-AdenoCA(42),Breast-AdenoCA(2),Eso-AdenoCA(1),Kidney-RCC(1),Lung-AdenoCA(1),Lung-SCC(1),Panc-AdenoCA(1),Skin-Melanoma(1),SoftTissue-Liposarc(1),Stomach-AdenoCA(1)
DISRUPTION	'C10orf11	51	Eso-AdenoCA(8),Breast-AdenoCA(7),Liver-HCC(7),Stomach-AdenoCA(6),Ovary-AdenoCA(5),Prost-AdenoCA(4),Lung-SCC(3),Bone-Osteosarc(2),ColoRect-AdenoCA(2),Biliary-AdenoCA(1),CNS-Medullo(1),Head-SCC(1),Kidney-RCC(1),Panc-AdenoCA(1),Skin-Melanoma(1),SoftTissue-Liposarc(1)
DISRUPTION	'TENM4	51	Breast-AdenoCA(15),Skin-Melanoma(14),Ovary-AdenoCA(5),Head-SCC(3),Liver-HCC(3),Prost-AdenoCA(2),Breast-LobularCA(1),CNS-GBM(1),ColoRect-AdenoCA(1),Eso-AdenoCA(1),Lung-SCC(1),Lymph-BNHL(1),Panc-AdenoCA(1),SoftTissue-Leiomyo(1),Stomach-AdenoCA(1)
FUSION_5	'NAALADL2	51	Breast-AdenoCA(12),Prost-AdenoCA(11),CNS-GBM(4),Ovary-AdenoCA(4),Liver-HCC(3),Panc-AdenoCA(3),Skin-Melanoma(3),Cervix-SCC(2),Lung-SCC(2),Stomach-AdenoCA(2),Bone-Osteosarc(1),Breast-LobularCA(1),ColoRect-AdenoCA(1),Head-SCC(1),Uterus-AdenoCA(1)
EXON_SKIP	'ANKS1B	50	Ovary-AdenoCA(13),Breast-AdenoCA(12),Prost-AdenoCA(6),Uterus-AdenoCA(5),Liver-HCC(4),Bladder-TCC(1),Bone-Osteosarc(1),ColoRect-AdenoCA(1),Eso-AdenoCA(1),Lung-AdenoCA(1),Panc-AdenoCA(1),Panc-Endocrine(1),Skin-Melanoma(1),SoftTissue-Leiomyo(1),Stomach-AdenoCA(1)
FUSION_5	'RUNX1	50	Breast-AdenoCA(16),Prost-AdenoCA(10),Panc-AdenoCA(5),Myeloid-AML(4),Bone-Osteosarc(3),Eso-AdenoCA(2),Kidney-RCC(2),Bladder-TCC(1),Breast-LobularCA(1),CNS-Medullo(1),ColoRect-AdenoCA(1),Liver-HCC(1),Myeloid-MDS(1),SoftTissue-Liposarc(1),Uterus-AdenoCA(1)
FUSION_3	'CPM	50	SoftTissue-Liposarc(35),CNS-GBM(5),Skin-Melanoma(3),Prost-AdenoCA(2),Stomach-AdenoCA(2),Bone-Osteosarc(1),Breast-AdenoCA(1),Liver-HCC(1)
DISRUPTION	'FOXP1	48	Prost-AdenoCA(23),Breast-AdenoCA(3),Ovary-AdenoCA(3),Skin-Melanoma(3),Biliary-AdenoCA(2),Kidney-RCC(2),Liver-HCC(2),Panc-AdenoCA(2),Stomach-AdenoCA(2),Bladder-TCC(1),ColoRect-AdenoCA(1),Eso-AdenoCA(1),Head-SCC(1),Lung-AdenoCA(1),Lung-SCC(1)
FUSION_5	'SYT1	48	SoftTissue-Liposarc(32),Bone-Osteosarc(7),Panc-AdenoCA(3),Prost-AdenoCA(2),Liver-HCC(1),Lung-AdenoCA(1),Lymph-BNHL(1),Ovary-AdenoCA(1)
FUSION_3	'GRIP1	48	Skin-Melanoma(15),SoftTissue-Liposarc(12),Bone-Osteosarc(9),Breast-AdenoCA(6),Stomach-AdenoCA(2),CNS-GBM(1),Eso-AdenoCA(1),Head-SCC(1),Lymph-BNHL(1)
DISRUPTION	'MTAP	47	Panc-AdenoCA(15),Skin-Melanoma(6),Lymph-BNHL(4),Eso-AdenoCA(3),CNS-GBM(2),Head-SCC(2),Liver-HCC(2),Panc-Endocrine(2),SoftTissue-Liposarc(2),Biliary-AdenoCA(1),Bone-Epith(1),Bone-Osteosarc(1),Breast-AdenoCA(1),Lung-AdenoCA(1),Lung-SCC(1),Ovary-AdenoCA(1),Prost-AdenoCA(1),Stomach-AdenoCA(1)
DISRUPTION	'SMYD3	47	Prost-AdenoCA(8),Eso-AdenoCA(6),Breast-AdenoCA(4),Liver-HCC(4),Skin-Melanoma(4),Lung-AdenoCA(3),Panc-AdenoCA(3),Biliary-AdenoCA(2),Bone-Osteosarc(2),CNS-GBM(2),Head-SCC(2),Bladder-TCC(1),ColoRect-AdenoCA(1),Lung-SCC(1),Ovary-AdenoCA(1),SoftTissue-Liposarc(1),Stomach-AdenoCA(1),Uterus-AdenoCA(1)
FUSION_5	'ERG	47	Prost-AdenoCA(38),Breast-AdenoCA(2),Skin-Melanoma(2),Bone-Osteosarc(1),Breast-LobularCA(1),Kidney-RCC(1),Stomach-AdenoCA(1),Uterus-AdenoCA(1)
FUSION_5	'IFNG-AS1	47	SoftTissue-Liposarc(33),Bone-Osteosarc(3),CNS-GBM(3),Breast-AdenoCA(2),Eso-AdenoCA(2),Skin-Melanoma(2),Liver-HCC(1),Stomach-AdenoCA(1)
FUSION_5	'TRHDE	47	SoftTissue-Liposarc(25),Bone-Osteosarc(5),Skin-Melanoma(5),Liver-HCC(2),Panc-AdenoCA(2),Biliary-AdenoCA(1),Breast-AdenoCA(1),Breast-LobularCA(1),CNS-Medullo(1),Eso-AdenoCA(1),Lung-SCC(1),Prost-AdenoCA(1),Stomach-AdenoCA(1)
DISRUPTION	'CNTN5	46	Prost-AdenoCA(11),Skin-Melanoma(6),Ovary-AdenoCA(5),Breast-AdenoCA(4),Eso-AdenoCA(3),Head-SCC(3),Stomach-AdenoCA(3),Bone-Osteosarc(2),Biliary-AdenoCA(1),Bladder-TCC(1),CNS-GBM(1),CNS-Oligo(1),Liver-HCC(1),Lung-SCC(1),Panc-AdenoCA(1),SoftTissue-Leiomyo(1),Uterus-AdenoCA(1)
DISRUPTION	'CTNND2	46	SoftTissue-Liposarc(8),Prost-AdenoCA(7),Liver-HCC(5),Skin-Melanoma(5),Panc-AdenoCA(4),Breast-AdenoCA(3),Ovary-AdenoCA(3),Stomach-AdenoCA(3),Bone-Osteosarc(2),Lung-AdenoCA(2),CNS-Medullo(1),Eso-AdenoCA(1),Kidney-ChRCC(1),Lymph-BNHL(1)
DISRUPTION	'MECOM	46	Ovary-AdenoCA(9),Breast-AdenoCA(7),Lung-SCC(5),Uterus-AdenoCA(5),Eso-AdenoCA(4),Prost-AdenoCA(4),Panc-AdenoCA(2),Skin-Melanoma(2),SoftTissue-Liposarc(2),Stomach-AdenoCA(2),Bone-Osteosarc(1),Cervix-SCC(1),Head-SCC(1),Liver-HCC(1)
DISRUPTION	'PRKG1	46	Prost-AdenoCA(13),Bone-Osteosarc(4),Ovary-AdenoCA(4),Panc-AdenoCA(4),Breast-AdenoCA(3),Eso-AdenoCA(3),Liver-HCC(3),Stomach-AdenoCA(3),CNS-Medullo(2),ColoRect-AdenoCA(2),Lung-SCC(2),Lung-AdenoCA(1),Lymph-BNHL(1),SoftTissue-Leiomyo(1)
DISRUPTION	'RP11-436D23.1	46	Prost-AdenoCA(21),Breast-AdenoCA(4),Skin-Melanoma(3),Bone-Osteosarc(2),Liver-HCC(2),Ovary-AdenoCA(2),Panc-AdenoCA(2),SoftTissue-Liposarc(2),Stomach-AdenoCA(2),CNS-GBM(1),CNS-Oligo(1),Eso-AdenoCA(1),Kidney-RCC(1),Lung-SCC(1),Lymph-CLL(1)
DISRUPTION	'THADA	46	Ovary-AdenoCA(9),Eso-AdenoCA(6),Thy-AdenoCA(6),Prost-AdenoCA(5),Stomach-AdenoCA(4),Uterus-AdenoCA(4),Breast-AdenoCA(3),Liver-HCC(2),Panc-AdenoCA(2),Biliary-AdenoCA(1),ColoRect-AdenoCA(1),Head-SCC(1),Panc-Endocrine(1),SoftTissue-Liposarc(1)
DISRUPTION	'ZNF536	46	Ovary-AdenoCA(13),Bone-Osteosarc(4),Breast-AdenoCA(4),Lung-SCC(3),Panc-AdenoCA(3),SoftTissue-Liposarc(3),Stomach-AdenoCA(3),CNS-GBM(2),Eso-AdenoCA(2),Prost-AdenoCA(2),Uterus-AdenoCA(2),ColoRect-AdenoCA(1),Kidney-ChRCC(1),Liver-HCC(1),Lung-AdenoCA(1),Skin-Melanoma(1)
EXON_SKIP	'DLG2	46	Bone-Osteosarc(11),Breast-AdenoCA(7),Liver-HCC(7),Eso-AdenoCA(4),Bone-Epith(2),Ovary-AdenoCA(2),Panc-AdenoCA(2),Stomach-AdenoCA(2),Biliary-AdenoCA(1),Bone-Benign(1),Breast-LobularCA(1),ColoRect-AdenoCA(1),Kidney-RCC(1),Panc-Endocrine(1),Skin-Melanoma(1),SoftTissue-Leiomyo(1),Uterus-AdenoCA(1)
DISRUPTION	'CDH12	45	SoftTissue-Liposarc(8),Skin-Melanoma(6),Breast-AdenoCA(5),Bone-Osteosarc(4),Ovary-AdenoCA(3),Panc-AdenoCA(3),Eso-AdenoCA(2),Liver-HCC(2),Prost-AdenoCA(2),Uterus-AdenoCA(2),Bladder-TCC(1),CNS-Medullo(1),Head-SCC(1),Kidney-ChRCC(1),Lung-AdenoCA(1),Lung-SCC(1),Lymph-BNHL(1),Stomach-AdenoCA(1)
DISRUPTION	'DLGAP1	45	Panc-AdenoCA(15),Eso-AdenoCA(5),Ovary-AdenoCA(4),Breast-AdenoCA(3),Liver-HCC(3),Stomach-AdenoCA(3),Uterus-AdenoCA(3),Biliary-AdenoCA(2),Prost-AdenoCA(2),SoftTissue-Liposarc(2),Lung-AdenoCA(1),Lung-SCC(1),Lymph-BNHL(1)
DISRUPTION	'LPP	45	Prost-AdenoCA(8),Ovary-AdenoCA(5),Breast-AdenoCA(4),Liver-HCC(4),Panc-AdenoCA(4),Stomach-AdenoCA(4),Bone-Osteosarc(2),CNS-GBM(2),Eso-AdenoCA(2),Head-SCC(2),Lymph-BNHL(2),Uterus-AdenoCA(2),Lung-SCC(1),Skin-Melanoma(1),SoftTissue-Leiomyo(1),SoftTissue-Liposarc(1)
DISRUPTION	'LRRC4C	45	Prost-AdenoCA(9),Breast-AdenoCA(6),Panc-AdenoCA(5),Ovary-AdenoCA(4),Skin-Melanoma(4),Stomach-AdenoCA(3),Bone-Osteosarc(2),Eso-AdenoCA(2),Head-SCC(2),Liver-HCC(2),Biliary-AdenoCA(1),Cervix-SCC(1),ColoRect-AdenoCA(1),Lung-AdenoCA(1),Lymph-BNHL(1),SoftTissue-Leiomyo(1)
EXON_SKIP	'AUTS2	45	Breast-AdenoCA(8),Liver-HCC(7),Lung-SCC(7),Bone-Osteosarc(4),Ovary-AdenoCA(4),Eso-AdenoCA(3),Lung-AdenoCA(2),Uterus-AdenoCA(2),Bone-Epith(1),Head-SCC(1),Kidney-RCC(1),Lymph-BNHL(1),Panc-AdenoCA(1),Panc-Endocrine(1),Skin-Melanoma(1),SoftTissue-Liposarc(1)
EXON_SKIP	'CNTNAP2	45	Prost-AdenoCA(10),Bone-Osteosarc(9),Liver-HCC(5),Eso-AdenoCA(3),Panc-AdenoCA(3),Panc-Endocrine(3),Skin-Melanoma(3),Breast-AdenoCA(2),Ovary-AdenoCA(2),Biliary-AdenoCA(1),ColoRect-AdenoCA(1),Lymph-BNHL(1),SoftTissue-Liposarc(1),Stomach-AdenoCA(1)
FUSION_5	'CPM	45	SoftTissue-Liposarc(26),Skin-Melanoma(7),CNS-GBM(4),Bone-Osteosarc(2),Stomach-AdenoCA(2),Breast-AdenoCA(1),Eso-AdenoCA(1),Liver-HCC(1),Lung-AdenoCA(1)
DISRUPTION	'AUTS2	44	Breast-AdenoCA(8),Prost-AdenoCA(5),Bone-Osteosarc(4),Skin-Melanoma(4),Ovary-AdenoCA(3),Panc-AdenoCA(3),ColoRect-AdenoCA(2),Liver-HCC(2),Lymph-BNHL(2),Stomach-AdenoCA(2),Uterus-AdenoCA(2),Bladder-TCC(1),Breast-LobularCA(1),Eso-AdenoCA(1),Lung-AdenoCA(1),Lung-SCC(1),SoftTissue-Leiomyo(1),SoftTissue-Liposarc(1)
DISRUPTION	'CDH18	44	Skin-Melanoma(6),SoftTissue-Liposarc(6),Bone-Osteosarc(5),Prost-AdenoCA(5),Breast-AdenoCA(3),Liver-HCC(3),Lung-AdenoCA(3),Lung-SCC(2),Ovary-AdenoCA(2),Panc-AdenoCA(2),Bladder-TCC(1),Bone-Epith(1),CNS-Medullo(1),Head-SCC(1),Kidney-ChRCC(1),Kidney-RCC(1),Uterus-AdenoCA(1)
DISRUPTION	'LINGO2	44	Ovary-AdenoCA(6),Skin-Melanoma(6),Breast-AdenoCA(4),Liver-HCC(4),Panc-AdenoCA(4),Lung-SCC(3),Prost-AdenoCA(3),Bone-Osteosarc(2),Lung-AdenoCA(2),Lymph-BNHL(2),Bladder-TCC(1),Bone-Epith(1),CNS-GBM(1),ColoRect-AdenoCA(1),Eso-AdenoCA(1),Head-SCC(1),Stomach-AdenoCA(1),Uterus-AdenoCA(1)
DISRUPTION	'ROBO1	44	Prost-AdenoCA(7),Breast-AdenoCA(6),Skin-Melanoma(5),Kidney-RCC(4),Eso-AdenoCA(3),Liver-HCC(3),Panc-AdenoCA(3),Bone-Osteosarc(2),Head-SCC(2),Uterus-AdenoCA(2),Bladder-TCC(1),Breast-DCIS(1),CNS-Medullo(1),Lung-AdenoCA(1),Ovary-AdenoCA(1),SoftTissue-Liposarc(1),Stomach-AdenoCA(1)
FUSION_5	'BCAS3	44	Breast-AdenoCA(20),Skin-Melanoma(5),Ovary-AdenoCA(3),Eso-AdenoCA(2),Head-SCC(2),Panc-AdenoCA(2),SoftTissue-Liposarc(2),Stomach-AdenoCA(2),ColoRect-AdenoCA(1),Liver-HCC(1),Lung-AdenoCA(1),Lung-SCC(1),Lymph-BNHL(1),Uterus-AdenoCA(1)
FUSION_5	'GRIP1	44	SoftTissue-Liposarc(12),Skin-Melanoma(9),Breast-AdenoCA(4),Eso-AdenoCA(4),Prost-AdenoCA(4),Stomach-AdenoCA(4),Bone-Osteosarc(1),CNS-GBM(1),Liver-HCC(1),Lung-AdenoCA(1),Lung-SCC(1),Lymph-BNHL(1),Panc-AdenoCA(1)
FUSION_5	'MGAT4C	44	SoftTissue-Liposarc(25),Bone-Osteosarc(5),Skin-Melanoma(5),Prost-AdenoCA(3),Liver-HCC(2),Panc-AdenoCA(2),Cervix-SCC(1),Eso-AdenoCA(1)
FUSION_3	'RP11-611E13.2	44	SoftTissue-Liposarc(21),Skin-Melanoma(10),Bone-Osteosarc(3),Eso-AdenoCA(3),Breast-AdenoCA(2),Panc-AdenoCA(2),ColoRect-AdenoCA(1),Liver-HCC(1),Stomach-AdenoCA(1)
DISRUPTION	'BCAS3	43	Breast-AdenoCA(17),Liver-HCC(5),Panc-AdenoCA(4),Bone-Osteosarc(2),Eso-AdenoCA(2),Ovary-AdenoCA(2),Prost-AdenoCA(2),Skin-Melanoma(2),SoftTissue-Liposarc(2),CNS-Medullo(1),ColoRect-AdenoCA(1),Lung-AdenoCA(1),Lung-SCC(1),Stomach-AdenoCA(1)
DISRUPTION	'DISC1FP1	43	Breast-AdenoCA(9),Prost-AdenoCA(9),Skin-Melanoma(5),Eso-AdenoCA(3),Panc-AdenoCA(3),Bladder-TCC(2),Liver-HCC(2),Ovary-AdenoCA(2),SoftTissue-Liposarc(2),CNS-GBM(1),Head-SCC(1),Kidney-RCC(1),Lymph-CLL(1),Panc-Endocrine(1),Stomach-AdenoCA(1)
DISRUPTION	'PLCB1	43	Breast-AdenoCA(6),Prost-AdenoCA(6),Ovary-AdenoCA(5),Head-SCC(3),Liver-HCC(3),SoftTissue-Liposarc(3),Bladder-TCC(2),Eso-AdenoCA(2),Lung-AdenoCA(2),Lung-SCC(2),Panc-AdenoCA(2),Skin-Melanoma(2),Stomach-AdenoCA(2),CNS-Medullo(1),SoftTissue-Leiomyo(1),Uterus-AdenoCA(1)
FUSION_3	'ANKS1B	43	Skin-Melanoma(9),SoftTissue-Liposarc(9),Breast-AdenoCA(4),Liver-HCC(4),Ovary-AdenoCA(4),Prost-AdenoCA(4),Uterus-AdenoCA(4),Bone-Osteosarc(2),Bladder-TCC(1),Eso-AdenoCA(1),Lung-AdenoCA(1)
FUSION_3	'DAB1	43	Breast-AdenoCA(13),Prost-AdenoCA(7),Liver-HCC(6),Panc-AdenoCA(4),SoftTissue-Liposarc(4),Bone-Osteosarc(3),Lung-AdenoCA(2),Ovary-AdenoCA(2),Cervix-SCC(1),Skin-Melanoma(1)
DISRUPTION	'AC096579.7	42	Lymph-CLL(22),Lymph-BNHL(18),Breast-AdenoCA(1),Ovary-AdenoCA(1)
DISRUPTION	'CDKAL1	42	Breast-AdenoCA(10),Ovary-AdenoCA(9),Eso-AdenoCA(4),Liver-HCC(3),Panc-AdenoCA(3),Bone-Osteosarc(2),Head-SCC(2),Biliary-AdenoCA(1),Bone-Benign(1),Cervix-SCC(1),Lung-AdenoCA(1),Prost-AdenoCA(1),Skin-Melanoma(1),SoftTissue-Leiomyo(1),Stomach-AdenoCA(1),Uterus-AdenoCA(1)
DISRUPTION	'DAB1	42	Prost-AdenoCA(13),Breast-AdenoCA(10),Liver-HCC(4),Ovary-AdenoCA(4),Skin-Melanoma(3),Bone-Osteosarc(1),Cervix-SCC(1),ColoRect-AdenoCA(1),Eso-AdenoCA(1),Panc-AdenoCA(1),SoftTissue-Leiomyo(1),SoftTissue-Liposarc(1),Stomach-AdenoCA(1)
DISRUPTION	'GRIK2	42	Prost-AdenoCA(11),Breast-AdenoCA(4),Panc-AdenoCA(4),Bone-Osteosarc(3),Eso-AdenoCA(2),Liver-HCC(2),Ovary-AdenoCA(2),SoftTissue-Liposarc(2),Stomach-AdenoCA(2),Uterus-AdenoCA(2),Biliary-AdenoCA(1),Bone-Benign(1),ColoRect-AdenoCA(1),Head-SCC(1),Lung-AdenoCA(1),Lung-SCC(1),Skin-Melanoma(1),SoftTissue-Leiomyo(1)
DISRUPTION	'PARD3B	42	Panc-AdenoCA(7),Prost-AdenoCA(7),Ovary-AdenoCA(5),Breast-AdenoCA(4),Liver-HCC(4),Eso-AdenoCA(3),Head-SCC(3),Skin-Melanoma(3),Lung-SCC(2),Uterus-AdenoCA(2),Kidney-RCC(1),Stomach-AdenoCA(1)
DISRUPTION	'TRAPPC9	42	Prost-AdenoCA(14),Breast-AdenoCA(8),Ovary-AdenoCA(7),Liver-HCC(3),Skin-Melanoma(3),Eso-AdenoCA(2),Biliary-AdenoCA(1),Bone-Osteosarc(1),Lung-SCC(1),Panc-AdenoCA(1),SoftTissue-Leiomyo(1)
DISRUPTION	'TRHDE	42	SoftTissue-Liposarc(11),Bone-Osteosarc(5),Ovary-AdenoCA(5),Breast-AdenoCA(4),Prost-AdenoCA(4),Panc-AdenoCA(3),Bladder-TCC(2),Skin-Melanoma(2),Stomach-AdenoCA(2),Eso-AdenoCA(1),Liver-HCC(1),Lung-AdenoCA(1),Lymph-BNHL(1)
FUSION_5	'CSMD3	42	Breast-AdenoCA(10),Lung-AdenoCA(6),Lymph-BNHL(5),Skin-Melanoma(4),SoftTissue-Liposarc(4),Liver-HCC(3),Ovary-AdenoCA(2),Prost-AdenoCA(2),Bone-Osteosarc(1),Cervix-SCC(1),ColoRect-AdenoCA(1),Lung-SCC(1),Panc-AdenoCA(1),Panc-Endocrine(1)
FUSION_3	'BCAS3	42	Breast-AdenoCA(19),Skin-Melanoma(5),Panc-AdenoCA(4),Stomach-AdenoCA(3),Eso-AdenoCA(2),Head-SCC(2),Liver-HCC(2),Ovary-AdenoCA(2),Lung-AdenoCA(1),Lung-SCC(1),Lymph-BNHL(1)
FUSION_3	'PCDH15	42	Prost-AdenoCA(23),Breast-AdenoCA(10),Liver-HCC(3),Lymph-BNHL(2),Stomach-AdenoCA(2),Lung-AdenoCA(1),Ovary-AdenoCA(1)
FUSION_3	'ROBO2	42	Breast-AdenoCA(6),Kidney-RCC(6),Skin-Melanoma(6),SoftTissue-Liposarc(6),Ovary-AdenoCA(4),Bone-Osteosarc(3),Panc-AdenoCA(3),SoftTissue-Leiomyo(2),Biliary-AdenoCA(1),ColoRect-AdenoCA(1),Lung-SCC(1),Lymph-BNHL(1),Prost-AdenoCA(1),Stomach-AdenoCA(1)
DISRUPTION	'FSTL5	41	Prost-AdenoCA(8),Panc-AdenoCA(5),Eso-AdenoCA(4),Liver-HCC(4),Ovary-AdenoCA(4),Skin-Melanoma(4),SoftTissue-Liposarc(3),Breast-AdenoCA(2),Lung-AdenoCA(2),Bone-Osteosarc(1),CNS-GBM(1),CNS-Medullo(1),Lymph-BNHL(1),Panc-Endocrine(1)
DISRUPTION	'NRG1	41	Breast-AdenoCA(8),Panc-AdenoCA(6),Lung-SCC(5),Eso-AdenoCA(4),Ovary-AdenoCA(4),Prost-AdenoCA(3),Bone-Osteosarc(2),Skin-Melanoma(2),Bladder-TCC(1),Breast-LobularCA(1),CNS-Oligo(1),Head-SCC(1),Lymph-BNHL(1),SoftTissue-Liposarc(1),Stomach-AdenoCA(1)
DISRUPTION	'RUNX1	41	Breast-AdenoCA(10),Ovary-AdenoCA(6),Kidney-RCC(3),Liver-HCC(3),Panc-AdenoCA(3),Stomach-AdenoCA(3),Bladder-TCC(2),Bone-Osteosarc(2),Cervix-SCC(1),Eso-AdenoCA(1),Lung-AdenoCA(1),Lung-SCC(1),Lymph-BNHL(1),Myeloid-MPN(1),Skin-Melanoma(1),SoftTissue-Liposarc(1),Uterus-AdenoCA(1)
FUSION_5	'PTPRR	41	SoftTissue-Liposarc(22),Stomach-AdenoCA(6),Bone-Osteosarc(3),Lung-AdenoCA(3),Biliary-AdenoCA(2),Skin-Melanoma(2),Breast-AdenoCA(1),CNS-GBM(1),Liver-HCC(1)
FUSION_3	'NAALADL2	41	Prost-AdenoCA(7),Breast-AdenoCA(6),Liver-HCC(4),Ovary-AdenoCA(4),Panc-AdenoCA(4),Skin-Melanoma(3),Bone-Osteosarc(2),CNS-GBM(2),Lung-SCC(2),Stomach-AdenoCA(2),Cervix-SCC(1),ColoRect-AdenoCA(1),Kidney-RCC(1),SoftTissue-Leiomyo(1),SoftTissue-Liposarc(1)
FUSION_3	'TSPAN8	41	SoftTissue-Liposarc(13),Skin-Melanoma(12),Eso-AdenoCA(4),Bone-Osteosarc(3),Uterus-AdenoCA(3),Lung-SCC(2),Breast-AdenoCA(1),CNS-GBM(1),Ovary-AdenoCA(1),Stomach-AdenoCA(1)
DISRUPTION	'ANKS1B	40	Prost-AdenoCA(6),Breast-AdenoCA(5),Liver-HCC(5),Ovary-AdenoCA(5),SoftTissue-Liposarc(3),Biliary-AdenoCA(2),Bone-Osteosarc(2),Lung-AdenoCA(2),Panc-AdenoCA(2),Skin-Melanoma(2),Uterus-AdenoCA(2),CNS-Medullo(1),ColoRect-AdenoCA(1),Eso-AdenoCA(1),Stomach-AdenoCA(1)
DISRUPTION	'GALNTL6	40	Prost-AdenoCA(12),Liver-HCC(4),Ovary-AdenoCA(4),Stomach-AdenoCA(4),Breast-AdenoCA(3),Panc-AdenoCA(3),Skin-Melanoma(3),Eso-AdenoCA(2),Bone-Osteosarc(1),ColoRect-AdenoCA(1),Head-SCC(1),Lymph-BNHL(1),SoftTissue-Liposarc(1)
DISRUPTION	'GRIP1	40	SoftTissue-Liposarc(10),Breast-AdenoCA(5),Panc-AdenoCA(5),Bone-Osteosarc(4),Eso-AdenoCA(3),Ovary-AdenoCA(3),CNS-GBM(2),Liver-HCC(2),Skin-Melanoma(2),Stomach-AdenoCA(2),Bladder-TCC(1),Lung-AdenoCA(1)
DISRUPTION	'KHDRBS2	40	Skin-Melanoma(9),Lung-SCC(5),Breast-AdenoCA(4),Ovary-AdenoCA(4),Liver-HCC(3),Prost-AdenoCA(3),Head-SCC(2),Lymph-BNHL(2),Panc-AdenoCA(2),Stomach-AdenoCA(2),Biliary-AdenoCA(1),Eso-AdenoCA(1),SoftTissue-Leiomyo(1),SoftTissue-Liposarc(1)
DISRUPTION	'LSAMP	40	Prost-AdenoCA(7),Eso-AdenoCA(6),Ovary-AdenoCA(6),Skin-Melanoma(4),Breast-AdenoCA(3),Head-SCC(2),Bone-Benign(1),Bone-Osteosarc(1),CNS-GBM(1),CNS-Medullo(1),ColoRect-AdenoCA(1),Liver-HCC(1),Lung-SCC(1),Lymph-BNHL(1),Panc-AdenoCA(1),Panc-Endocrine(1),Stomach-AdenoCA(1),Uterus-AdenoCA(1)
FUSION_3	'ASIC2	40	Breast-AdenoCA(15),Eso-AdenoCA(5),Liver-HCC(5),Bladder-TCC(4),Panc-AdenoCA(3),SoftTissue-Liposarc(2),Bone-Osteosarc(1),Breast-DCIS(1),ColoRect-AdenoCA(1),Lung-SCC(1),Ovary-AdenoCA(1),Uterus-AdenoCA(1)
DISRUPTION	'BCL2	39	Lymph-BNHL(27),Lung-AdenoCA(2),Lymph-CLL(2),Bone-Osteosarc(1),Breast-AdenoCA(1),Liver-HCC(1),Lung-SCC(1),Ovary-AdenoCA(1),Panc-AdenoCA(1),Prost-AdenoCA(1),Skin-Melanoma(1)
DISRUPTION	'CA10	39	Breast-AdenoCA(9),Prost-AdenoCA(7),Panc-AdenoCA(5),Ovary-AdenoCA(4),Liver-HCC(3),Eso-AdenoCA(2),Skin-Melanoma(2),Uterus-AdenoCA(2),Biliary-AdenoCA(1),CNS-Medullo(1),Lung-SCC(1),Panc-Endocrine(1),SoftTissue-Liposarc(1)
DISRUPTION	'DCC	39	Panc-AdenoCA(7),Breast-AdenoCA(5),Bone-Osteosarc(4),Lymph-BNHL(4),ColoRect-AdenoCA(3),Eso-AdenoCA(3),Liver-HCC(3),Lung-SCC(2),Kidney-RCC(1),Lung-AdenoCA(1),Prost-AdenoCA(1),Skin-Melanoma(1),SoftTissue-Leiomyo(1),SoftTissue-Liposarc(1),Stomach-AdenoCA(1),Uterus-AdenoCA(1)
DISRUPTION	'PTPRN2	39	Breast-AdenoCA(8),Ovary-AdenoCA(4),Stomach-AdenoCA(4),Bone-Osteosarc(3),Liver-HCC(3),Panc-AdenoCA(3),Skin-Melanoma(3),Prost-AdenoCA(2),Uterus-AdenoCA(2),CNS-GBM(1),Cervix-SCC(1),Eso-AdenoCA(1),Kidney-RCC(1),Lung-SCC(1),Panc-Endocrine(1),SoftTissue-Liposarc(1)
FUSION_3	'IFNG-AS1	39	SoftTissue-Liposarc(21),Skin-Melanoma(5),Eso-AdenoCA(4),Breast-AdenoCA(3),CNS-GBM(2),Liver-HCC(2),Lung-AdenoCA(2)
DISRUPTION	'CASC8	38	Eso-AdenoCA(8),Breast-AdenoCA(7),CNS-Medullo(5),Panc-AdenoCA(5),Stomach-AdenoCA(4),Head-SCC(2),Ovary-AdenoCA(2),Panc-Endocrine(2),Liver-HCC(1),Lung-AdenoCA(1),Lung-SCC(1)
DISRUPTION	'CDK12	38	Breast-AdenoCA(13),Uterus-AdenoCA(5),Eso-AdenoCA(4),Stomach-AdenoCA(4),Head-SCC(2),Ovary-AdenoCA(2),Bone-Osteosarc(1),Breast-LobularCA(1),ColoRect-AdenoCA(1),Lung-AdenoCA(1),Lymph-BNHL(1),Prost-AdenoCA(1),SoftTissue-Leiomyo(1),SoftTissue-Liposarc(1)
DISRUPTION	'FIP1L1	38	Liver-HCC(7),CNS-GBM(6),Ovary-AdenoCA(5),Stomach-AdenoCA(3),Bone-Osteosarc(2),Breast-AdenoCA(2),Eso-AdenoCA(2),Panc-AdenoCA(2),Skin-Melanoma(2),Bone-Benign(1),CNS-Oligo(1),ColoRect-AdenoCA(1),Lung-AdenoCA(1),Lung-SCC(1),Prost-AdenoCA(1),Uterus-AdenoCA(1)
DISRUPTION	'LPHN3	38	Prost-AdenoCA(10),Liver-HCC(6),Eso-AdenoCA(4),Panc-AdenoCA(4),Breast-AdenoCA(3),Bone-Osteosarc(2),Ovary-AdenoCA(2),Skin-Melanoma(2),Biliary-AdenoCA(1),Lung-AdenoCA(1),Lung-SCC(1),Panc-Endocrine(1),SoftTissue-Liposarc(1)
DISRUPTION	'NRG3	38	Prost-AdenoCA(9),Panc-AdenoCA(8),Breast-AdenoCA(6),Liver-HCC(3),Ovary-AdenoCA(3),Uterus-AdenoCA(3),Bladder-TCC(1),Bone-Osteosarc(1),Eso-AdenoCA(1),Lung-SCC(1),Lymph-BNHL(1),Skin-Melanoma(1)
DISRUPTION	'SGCZ	38	Ovary-AdenoCA(5),Breast-AdenoCA(4),Liver-HCC(4),Panc-AdenoCA(4),Skin-Melanoma(4),Eso-AdenoCA(3),Lung-AdenoCA(3),Bone-Osteosarc(2),Prost-AdenoCA(2),Stomach-AdenoCA(2),Biliary-AdenoCA(1),Bladder-TCC(1),CNS-GBM(1),Lymph-BNHL(1),SoftTissue-Liposarc(1)
DISRUPTION	'ZMAT4	38	Prost-AdenoCA(9),Breast-AdenoCA(8),Ovary-AdenoCA(6),Liver-HCC(3),ColoRect-AdenoCA(2),Panc-AdenoCA(2),Biliary-AdenoCA(1),Bladder-TCC(1),Kidney-RCC(1),Lymph-BNHL(1),Skin-Melanoma(1),SoftTissue-Liposarc(1),Stomach-AdenoCA(1),Uterus-AdenoCA(1)
EXON_SKIP	'PRKG1	38	ColoRect-AdenoCA(8),Eso-AdenoCA(8),Prost-AdenoCA(7),Breast-AdenoCA(4),Stomach-AdenoCA(4),Panc-AdenoCA(2),Bone-Osteosarc(1),Liver-HCC(1),Lung-SCC(1),Ovary-AdenoCA(1),Skin-Melanoma(1)
FUSION_3	'PTPRR	38	SoftTissue-Liposarc(21),Bone-Osteosarc(4),Skin-Melanoma(4),Stomach-AdenoCA(3),CNS-GBM(2),Eso-AdenoCA(1),Liver-HCC(1),Lung-SCC(1),Uterus-AdenoCA(1)
FUSION_3	'RP11-179A16.1	38	Skin-Melanoma(13),Breast-AdenoCA(12),Ovary-AdenoCA(3),Liver-HCC(2),Lung-SCC(2),Prost-AdenoCA(2),CNS-Oligo(1),ColoRect-AdenoCA(1),Eso-AdenoCA(1),Panc-Endocrine(1)
DISRUPTION	'AQP4-AS1	37	Panc-AdenoCA(12),Ovary-AdenoCA(4),Lung-SCC(3),CNS-GBM(2),Eso-AdenoCA(2),Liver-HCC(2),Prost-AdenoCA(2),Skin-Melanoma(2),Breast-AdenoCA(1),Breast-LobularCA(1),Head-SCC(1),Lung-AdenoCA(1),Lymph-BNHL(1),Myeloid-MPN(1),SoftTissue-Leiomyo(1),Stomach-AdenoCA(1)
DISRUPTION	'EPHA6	37	Ovary-AdenoCA(7),Breast-AdenoCA(5),Panc-AdenoCA(5),Liver-HCC(3),Prost-AdenoCA(3),Eso-AdenoCA(2),Head-SCC(2),Kidney-RCC(2),Bladder-TCC(1),Bone-Benign(1),CNS-Medullo(1),Lung-AdenoCA(1),Lung-SCC(1),Skin-Melanoma(1),Stomach-AdenoCA(1),Uterus-AdenoCA(1)
DISRUPTION	'GPC5	37	Lymph-BNHL(6),Breast-AdenoCA(5),Prost-AdenoCA(4),Panc-AdenoCA(3),Bone-Osteosarc(2),Eso-AdenoCA(2),Liver-HCC(2),Lung-AdenoCA(2),Ovary-AdenoCA(2),Skin-Melanoma(2),CNS-GBM(1),ColoRect-AdenoCA(1),Kidney-ChRCC(1),Kidney-RCC(1),SoftTissue-Leiomyo(1),SoftTissue-Liposarc(1),Stomach-AdenoCA(1)
DISRUPTION	'GPC6	37	Prost-AdenoCA(16),Panc-AdenoCA(5),Breast-AdenoCA(2),Liver-HCC(2),Uterus-AdenoCA(2),Bone-Osteosarc(1),Eso-AdenoCA(1),Kidney-ChRCC(1),Lung-SCC(1),Lymph-BNHL(1),Ovary-AdenoCA(1),Panc-Endocrine(1),Skin-Melanoma(1),SoftTissue-Liposarc(1),Stomach-AdenoCA(1)
DISRUPTION	'KLF12	37	Prost-AdenoCA(9),Stomach-AdenoCA(5),Eso-AdenoCA(3),Head-SCC(3),Panc-AdenoCA(3),Breast-AdenoCA(2),ColoRect-AdenoCA(2),Liver-HCC(2),CNS-Oligo(1),Cervix-SCC(1),Kidney-ChRCC(1),Lung-SCC(1),Lymph-BNHL(1),Lymph-CLL(1),Ovary-AdenoCA(1),SoftTissue-Liposarc(1)
DISRUPTION	'NLGN1	37	Breast-AdenoCA(10),Lung-SCC(6),Prost-AdenoCA(4),Liver-HCC(3),Ovary-AdenoCA(3),SoftTissue-Liposarc(3),Eso-AdenoCA(2),Panc-AdenoCA(2),CNS-GBM(1),ColoRect-AdenoCA(1),Skin-Melanoma(1),SoftTissue-Leiomyo(1)
DISRUPTION	'RAD51B	37	Prost-AdenoCA(7),Breast-AdenoCA(6),Ovary-AdenoCA(4),Liver-HCC(3),Panc-AdenoCA(3),Stomach-AdenoCA(3),Biliary-AdenoCA(2),Eso-AdenoCA(2),Head-SCC(2),Bone-Osteosarc(1),CNS-Medullo(1),Lung-SCC(1),Skin-Melanoma(1),Uterus-AdenoCA(1)
DISRUPTION	'SOX2-OT	37	Prost-AdenoCA(7),Eso-AdenoCA(5),Breast-AdenoCA(4),Lung-SCC(3),Ovary-AdenoCA(3),Bone-Osteosarc(2),Liver-HCC(2),Skin-Melanoma(2),Biliary-AdenoCA(1),CNS-GBM(1),Cervix-SCC(1),ColoRect-AdenoCA(1),Kidney-RCC(1),Panc-AdenoCA(1),SoftTissue-Leiomyo(1),SoftTissue-Liposarc(1),Uterus-AdenoCA(1)
DISRUPTION	'THSD7B	37	Prost-AdenoCA(16),Panc-AdenoCA(4),Liver-HCC(3),Ovary-AdenoCA(3),Breast-AdenoCA(2),Eso-AdenoCA(2),Uterus-AdenoCA(2),Bladder-TCC(1),ColoRect-AdenoCA(1),Lung-SCC(1),Skin-Melanoma(1),SoftTissue-Liposarc(1)
DISRUPTION	'TMEM132D	37	Prost-AdenoCA(13),Ovary-AdenoCA(3),Panc-AdenoCA(3),Breast-AdenoCA(2),CNS-GBM(2),Skin-Melanoma(2),SoftTissue-Leiomyo(2),SoftTissue-Liposarc(2),Bladder-TCC(1),Bone-Osteosarc(1),Kidney-ChRCC(1),Liver-HCC(1),Lung-AdenoCA(1),Lung-SCC(1),Panc-Endocrine(1),Uterus-AdenoCA(1)
EXON_SKIP	'RP11-420N3.2	37	ColoRect-AdenoCA(15),Skin-Melanoma(7),Panc-AdenoCA(5),Eso-AdenoCA(4),Bladder-TCC(1),Bone-Osteosarc(1),Breast-AdenoCA(1),Liver-HCC(1),Lung-SCC(1),Stomach-AdenoCA(1)
EXON_SKIP	'VPS13B	37	Eso-AdenoCA(14),Liver-HCC(7),Stomach-AdenoCA(5),Breast-AdenoCA(2),Head-SCC(2),Panc-AdenoCA(2),Biliary-AdenoCA(1),ColoRect-AdenoCA(1),Lymph-BNHL(1),Ovary-AdenoCA(1),SoftTissue-Liposarc(1)
FUSION_5	'ASIC2	37	Breast-AdenoCA(11),Liver-HCC(4),Stomach-AdenoCA(4),Lung-SCC(3),Panc-AdenoCA(3),Uterus-AdenoCA(3),Eso-AdenoCA(2),Ovary-AdenoCA(2),Bladder-TCC(1),CNS-GBM(1),Cervix-SCC(1),Head-SCC(1),Skin-Melanoma(1)
FUSION_5	'PTK2	37	Prost-AdenoCA(10),Breast-AdenoCA(5),Eso-AdenoCA(4),Skin-Melanoma(3),Stomach-AdenoCA(3),Bone-Osteosarc(2),Liver-HCC(2),Panc-AdenoCA(2),Uterus-AdenoCA(2),ColoRect-AdenoCA(1),Head-SCC(1),Lung-AdenoCA(1),Ovary-AdenoCA(1)
FUSION_5	'PTPRD	37	Skin-Melanoma(12),SoftTissue-Liposarc(5),Bone-Osteosarc(4),Ovary-AdenoCA(4),Lymph-BNHL(3),Breast-AdenoCA(2),CNS-GBM(2),Biliary-AdenoCA(1),Head-SCC(1),Panc-AdenoCA(1),Stomach-AdenoCA(1),Uterus-AdenoCA(1)
FUSION_5	'RP11-611E13.2	37	SoftTissue-Liposarc(23),Skin-Melanoma(9),Breast-AdenoCA(2),Bone-Osteosarc(1),Liver-HCC(1),Uterus-AdenoCA(1)
FUSION_3	'AC096579.7	37	Lymph-BNHL(22),Lymph-CLL(14),Ovary-AdenoCA(1)
FUSION_3	'DSCAM	37	Prost-AdenoCA(22),Breast-AdenoCA(4),Ovary-AdenoCA(3),Skin-Melanoma(2),Stomach-AdenoCA(2),Breast-LobularCA(1),Kidney-RCC(1),Lung-AdenoCA(1),SoftTissue-Liposarc(1)
DISRUPTION	'CDKN2B-AS1	36	Panc-AdenoCA(11),Eso-AdenoCA(5),Liver-HCC(5),Skin-Melanoma(5),CNS-GBM(3),Biliary-AdenoCA(1),Bladder-TCC(1),Bone-Osteosarc(1),Head-SCC(1),Lung-SCC(1),Prost-AdenoCA(1),Uterus-AdenoCA(1)
DISRUPTION	'CPM	36	SoftTissue-Liposarc(15),Breast-AdenoCA(3),CNS-GBM(3),Bone-Osteosarc(2),Eso-AdenoCA(2),Ovary-AdenoCA(2),Panc-AdenoCA(2),Stomach-AdenoCA(2),Bladder-TCC(1),Liver-HCC(1),Lung-AdenoCA(1),Prost-AdenoCA(1),Skin-Melanoma(1)
DISRUPTION	'GMDS	36	Breast-AdenoCA(7),Ovary-AdenoCA(7),Eso-AdenoCA(5),Stomach-AdenoCA(4),Panc-AdenoCA(3),ColoRect-AdenoCA(2),Bone-Benign(1),Head-SCC(1),Liver-HCC(1),Lung-AdenoCA(1),Lymph-BNHL(1),Prost-AdenoCA(1),Skin-Melanoma(1),SoftTissue-Liposarc(1)
DISRUPTION	'NKAIN2	36	Breast-AdenoCA(7),Eso-AdenoCA(4),Ovary-AdenoCA(3),Skin-Melanoma(3),Bone-Osteosarc(2),Cervix-SCC(2),Liver-HCC(2),Prost-AdenoCA(2),Uterus-AdenoCA(2),CNS-GBM(1),ColoRect-AdenoCA(1),Head-SCC(1),Lung-AdenoCA(1),Lymph-BNHL(1),SoftTissue-Leiomyo(1),SoftTissue-Liposarc(1),Stomach-AdenoCA(1),Thy-AdenoCA(1)
DISRUPTION	'RBFOX1	36	Panc-AdenoCA(7),ColoRect-AdenoCA(4),Liver-HCC(4),Ovary-AdenoCA(4),Breast-AdenoCA(3),Eso-AdenoCA(3),Skin-Melanoma(3),Bladder-TCC(2),Bone-Osteosarc(2),Prost-AdenoCA(2),Lung-SCC(1),SoftTissue-Liposarc(1)
EXON_SKIP	'FOXP1	36	Liver-HCC(11),Stomach-AdenoCA(5),Prost-AdenoCA(4),Lung-AdenoCA(3),Lung-SCC(3),Eso-AdenoCA(2),Head-SCC(2),Bladder-TCC(1),ColoRect-AdenoCA(1),Lymph-BNHL(1),Ovary-AdenoCA(1),Panc-AdenoCA(1),Skin-Melanoma(1)
EXON_SKIP	'SMYD3	36	Eso-AdenoCA(14),Breast-AdenoCA(4),Head-SCC(4),Stomach-AdenoCA(4),Liver-HCC(2),Lung-SCC(2),Panc-AdenoCA(2),Biliary-AdenoCA(1),Bone-Osteosarc(1),Ovary-AdenoCA(1),Skin-Melanoma(1)
FUSION_5	'EXOC4	36	SoftTissue-Liposarc(14),Skin-Melanoma(10),Ovary-AdenoCA(2),Prost-AdenoCA(2),Bladder-TCC(1),Bone-Epith(1),Bone-Osteosarc(1),Breast-AdenoCA(1),Head-SCC(1),Kidney-RCC(1),Liver-HCC(1),Lung-AdenoCA(1)
FUSION_5	'RP11-179A16.1	36	Breast-AdenoCA(15),Skin-Melanoma(10),Ovary-AdenoCA(4),Liver-HCC(2),Prost-AdenoCA(2),CNS-Oligo(1),Panc-AdenoCA(1),Panc-Endocrine(1)
FUSION_3	'EYS	36	Breast-AdenoCA(9),Liver-HCC(6),Ovary-AdenoCA(4),Biliary-AdenoCA(3),Prost-AdenoCA(3),Head-SCC(2),Lung-SCC(2),Panc-AdenoCA(2),Skin-Melanoma(2),Bone-Osteosarc(1),Cervix-SCC(1),Eso-AdenoCA(1)
FUSION_3	'PTPRD	36	Skin-Melanoma(8),Bone-Osteosarc(5),Panc-AdenoCA(4),Prost-AdenoCA(3),Uterus-AdenoCA(3),Bladder-TCC(2),Breast-AdenoCA(2),Liver-HCC(2),SoftTissue-Liposarc(2),CNS-GBM(1),Eso-AdenoCA(1),Lymph-BNHL(1),Ovary-AdenoCA(1),Stomach-AdenoCA(1)
DISRUPTION	'DPP6	35	Prost-AdenoCA(11),Breast-AdenoCA(4),Liver-HCC(4),Lung-SCC(2),Panc-AdenoCA(2),Skin-Melanoma(2),SoftTissue-Liposarc(2),Bladder-TCC(1),Bone-Osteosarc(1),ColoRect-AdenoCA(1),Eso-AdenoCA(1),Kidney-ChRCC(1),Panc-Endocrine(1),SoftTissue-Leiomyo(1),Stomach-AdenoCA(1)
DISRUPTION	'DYNC2H1	35	Prost-AdenoCA(5),Skin-Melanoma(5),Breast-AdenoCA(4),Head-SCC(4),Eso-AdenoCA(3),Ovary-AdenoCA(3),SoftTissue-Liposarc(2),Biliary-AdenoCA(1),Bone-Osteosarc(1),CNS-GBM(1),Cervix-SCC(1),ColoRect-AdenoCA(1),Lymph-BNHL(1),Panc-AdenoCA(1),Stomach-AdenoCA(1),Uterus-AdenoCA(1)
DISRUPTION	'EXOC4	35	Breast-AdenoCA(5),Liver-HCC(5),Ovary-AdenoCA(4),Panc-AdenoCA(4),Eso-AdenoCA(3),Skin-Melanoma(3),SoftTissue-Liposarc(3),Bone-Osteosarc(2),Lung-SCC(2),Stomach-AdenoCA(2),Biliary-AdenoCA(1),ColoRect-AdenoCA(1)
DISRUPTION	'GRID2	35	Prost-AdenoCA(10),Breast-AdenoCA(4),Eso-AdenoCA(4),Liver-HCC(3),Stomach-AdenoCA(3),Skin-Melanoma(2),ColoRect-AdenoCA(1),Kidney-RCC(1),Lung-AdenoCA(1),Lymph-BNHL(1),Myeloid-AML(1),Ovary-AdenoCA(1),Panc-AdenoCA(1),Panc-Endocrine(1),SoftTissue-Liposarc(1)
DISRUPTION	'KCNB2	35	Prost-AdenoCA(14),Breast-AdenoCA(3),Eso-AdenoCA(3),Liver-HCC(3),Lung-AdenoCA(2),Panc-AdenoCA(2),Skin-Melanoma(2),Bone-Osteosarc(1),CNS-Medullo(1),Ovary-AdenoCA(1),SoftTissue-Liposarc(1),Stomach-AdenoCA(1),Uterus-AdenoCA(1)
DISRUPTION	'MAGI2	35	Eso-AdenoCA(6),Bone-Osteosarc(4),Ovary-AdenoCA(4),Breast-AdenoCA(3),Liver-HCC(3),Lung-SCC(3),SoftTissue-Liposarc(3),Stomach-AdenoCA(3),Biliary-AdenoCA(1),Cervix-SCC(1),Prost-AdenoCA(1),Skin-Melanoma(1),SoftTissue-Leiomyo(1),Uterus-AdenoCA(1)
DISRUPTION	'NCKAP5	35	Prost-AdenoCA(13),Breast-AdenoCA(7),Eso-AdenoCA(3),Head-SCC(2),Skin-Melanoma(2),Breast-LobularCA(1),CNS-Medullo(1),Kidney-RCC(1),Lung-SCC(1),Ovary-AdenoCA(1),Panc-AdenoCA(1),SoftTissue-Liposarc(1),Stomach-AdenoCA(1)
DISRUPTION	'PARK2	35	Breast-AdenoCA(11),Liver-HCC(5),Prost-AdenoCA(5),Panc-AdenoCA(4),Ovary-AdenoCA(3),CNS-GBM(2),Biliary-AdenoCA(1),Bone-Osteosarc(1),Lung-AdenoCA(1),Lung-SCC(1),Stomach-AdenoCA(1)
DISRUPTION	'PPP6R3	35	Skin-Melanoma(8),Breast-AdenoCA(7),Prost-AdenoCA(7),Liver-HCC(3),Lung-SCC(3),Bladder-TCC(1),Breast-LobularCA(1),CNS-GBM(1),Head-SCC(1),Lymph-CLL(1),Ovary-AdenoCA(1),Uterus-AdenoCA(1)
DISRUPTION	'RALYL	35	Prost-AdenoCA(7),Ovary-AdenoCA(4),Panc-AdenoCA(4),Breast-AdenoCA(3),Bone-Osteosarc(2),Head-SCC(2),Liver-HCC(2),Lung-AdenoCA(2),SoftTissue-Liposarc(2),Bladder-TCC(1),Breast-LobularCA(1),ColoRect-AdenoCA(1),Eso-AdenoCA(1),Lung-SCC(1),Lymph-BNHL(1),Skin-Melanoma(1)
FUSION_5	'CNTN5	35	Breast-AdenoCA(8),Skin-Melanoma(8),Head-SCC(3),Ovary-AdenoCA(3),Prost-AdenoCA(3),Bone-Osteosarc(2),Lung-SCC(2),Bladder-TCC(1),CNS-Medullo(1),Eso-AdenoCA(1),Liver-HCC(1),SoftTissue-Liposarc(1),Uterus-AdenoCA(1)
FUSION_5	'DLG2	35	Breast-AdenoCA(9),Skin-Melanoma(7),Liver-HCC(5),Ovary-AdenoCA(4),Eso-AdenoCA(2),Uterus-AdenoCA(2),Bone-Epith(1),Bone-Osteosarc(1),Panc-AdenoCA(1),Panc-Endocrine(1),SoftTissue-Liposarc(1),Stomach-AdenoCA(1)
FUSION_5	'MACROD2	35	Breast-AdenoCA(11),Panc-AdenoCA(5),Ovary-AdenoCA(4),Eso-AdenoCA(2),Skin-Melanoma(2),Bladder-TCC(1),Bone-Epith(1),Bone-Osteosarc(1),ColoRect-AdenoCA(1),Head-SCC(1),Kidney-ChRCC(1),Liver-HCC(1),Lung-SCC(1),SoftTissue-Leiomyo(1),SoftTissue-Liposarc(1),Uterus-AdenoCA(1)
FUSION_5	'ZNF536	35	Ovary-AdenoCA(6),Prost-AdenoCA(6),SoftTissue-Liposarc(6),Stomach-AdenoCA(5),Uterus-AdenoCA(3),Bone-Osteosarc(2),Breast-AdenoCA(2),Panc-AdenoCA(2),CNS-GBM(1),Head-SCC(1),Lung-SCC(1)
DISRUPTION	'AGBL4	34	Breast-AdenoCA(8),Panc-AdenoCA(7),Skin-Melanoma(4),Liver-HCC(3),Biliary-AdenoCA(2),Prost-AdenoCA(2),Stomach-AdenoCA(2),Bone-Osteosarc(1),ColoRect-AdenoCA(1),Eso-AdenoCA(1),Lung-AdenoCA(1),Ovary-AdenoCA(1),Panc-Endocrine(1)
DISRUPTION	'ANK1	34	Breast-AdenoCA(8),Liver-HCC(6),Panc-AdenoCA(5),Prost-AdenoCA(4),Skin-Melanoma(2),Bladder-TCC(1),Bone-Osteosarc(1),Breast-LobularCA(1),CNS-Medullo(1),ColoRect-AdenoCA(1),Eso-AdenoCA(1),Lung-SCC(1),Ovary-AdenoCA(1),Stomach-AdenoCA(1)
DISRUPTION	'BAI3	34	Liver-HCC(10),Breast-AdenoCA(4),Ovary-AdenoCA(4),Eso-AdenoCA(3),Panc-AdenoCA(3),Prost-AdenoCA(2),Skin-Melanoma(2),Biliary-AdenoCA(1),Bladder-TCC(1),Bone-Osteosarc(1),Head-SCC(1),Lung-AdenoCA(1),Uterus-AdenoCA(1)
DISRUPTION	'CNTNAP5	34	Prost-AdenoCA(9),Breast-AdenoCA(4),Ovary-AdenoCA(4),Liver-HCC(3),Bone-Osteosarc(2),Eso-AdenoCA(2),Lung-SCC(2),Panc-AdenoCA(2),Skin-Melanoma(2),CNS-GBM(1),CNS-Oligo(1),ColoRect-AdenoCA(1),SoftTissue-Leiomyo(1)
DISRUPTION	'ERG	34	Prost-AdenoCA(21),Bone-Osteosarc(2),Breast-AdenoCA(2),Skin-Melanoma(2),Breast-LobularCA(1),Cervix-SCC(1),Eso-AdenoCA(1),Kidney-RCC(1),Ovary-AdenoCA(1),SoftTissue-Leiomyo(1),Stomach-AdenoCA(1)
DISRUPTION	'FOCAD	34	Panc-AdenoCA(8),Skin-Melanoma(4),CNS-Medullo(3),Bladder-TCC(2),Breast-AdenoCA(2),CNS-GBM(2),Stomach-AdenoCA(2),Uterus-AdenoCA(2),Biliary-AdenoCA(1),Eso-AdenoCA(1),Head-SCC(1),Liver-HCC(1),Lung-SCC(1),Lymph-BNHL(1),Ovary-AdenoCA(1),SoftTissue-Leiomyo(1),SoftTissue-Liposarc(1)
DISRUPTION	'PARD3	34	Prost-AdenoCA(12),Panc-AdenoCA(5),Breast-AdenoCA(3),Bone-Osteosarc(2),Eso-AdenoCA(2),Lung-SCC(2),Skin-Melanoma(2),Head-SCC(1),Lymph-BNHL(1),Ovary-AdenoCA(1),Panc-Endocrine(1),Stomach-AdenoCA(1),Uterus-AdenoCA(1)
DISRUPTION	'PCDH9	34	Prost-AdenoCA(8),Breast-AdenoCA(5),Liver-HCC(4),Skin-Melanoma(4),Lung-SCC(2),Ovary-AdenoCA(2),Stomach-AdenoCA(2),Bladder-TCC(1),Eso-AdenoCA(1),Head-SCC(1),Kidney-ChRCC(1),Kidney-RCC(1),Lymph-BNHL(1),Panc-AdenoCA(1)
DISRUPTION	'RP11-6N13.1	34	Prost-AdenoCA(14),Liver-HCC(3),Panc-AdenoCA(3),Eso-AdenoCA(2),Kidney-RCC(2),Ovary-AdenoCA(2),Skin-Melanoma(2),Stomach-AdenoCA(2),Bone-Osteosarc(1),ColoRect-AdenoCA(1),Kidney-ChRCC(1),Lymph-BNHL(1)
DISRUPTION	'SYT1	34	Prost-AdenoCA(8),SoftTissue-Liposarc(8),Bone-Osteosarc(3),Breast-AdenoCA(3),Eso-AdenoCA(2),Lung-AdenoCA(2),Ovary-AdenoCA(2),Panc-AdenoCA(2),Liver-HCC(1),Lung-SCC(1),Skin-Melanoma(1),Stomach-AdenoCA(1)
EXON_SKIP	'EYS	34	Liver-HCC(6),Panc-AdenoCA(4),Prost-AdenoCA(4),Skin-Melanoma(4),Bone-Osteosarc(2),Breast-AdenoCA(2),Eso-AdenoCA(2),Lymph-BNHL(2),Panc-Endocrine(2),Biliary-AdenoCA(1),Bladder-TCC(1),Bone-Epith(1),Head-SCC(1),Ovary-AdenoCA(1),SoftTissue-Leiomyo(1)
FUSION_5	'FRS2	34	SoftTissue-Liposarc(26),Breast-AdenoCA(2),Eso-AdenoCA(2),Liver-HCC(1),Lung-AdenoCA(1),Stomach-AdenoCA(1),Uterus-AdenoCA(1)
FUSION_5	'MTAP	34	Liver-HCC(7),Lymph-BNHL(6),Eso-AdenoCA(4),Skin-Melanoma(4),Panc-AdenoCA(3),Bladder-TCC(2),Biliary-AdenoCA(1),Bone-Epith(1),Bone-Osteosarc(1),CNS-Oligo(1),Lung-SCC(1),Panc-Endocrine(1),SoftTissue-Leiomyo(1),Stomach-AdenoCA(1)
FUSION_3	'PDE4D	34	Prost-AdenoCA(6),SoftTissue-Liposarc(6),Breast-AdenoCA(5),Lung-AdenoCA(4),Liver-HCC(3),Eso-AdenoCA(2),Ovary-AdenoCA(2),Skin-Melanoma(2),Bone-Osteosarc(1),Kidney-RCC(1),Lymph-BNHL(1),Stomach-AdenoCA(1)
FUSION_3	'VMP1	34	Breast-AdenoCA(10),Bone-Osteosarc(5),Panc-AdenoCA(5),Eso-AdenoCA(3),Head-SCC(3),Liver-HCC(2),Stomach-AdenoCA(2),Cervix-SCC(1),Lung-AdenoCA(1),Panc-Endocrine(1),Uterus-AdenoCA(1)
DISRUPTION	'DPP10	33	Panc-AdenoCA(7),Ovary-AdenoCA(5),Prost-AdenoCA(4),Breast-AdenoCA(3),Eso-AdenoCA(2),Lung-SCC(2),Skin-Melanoma(2),Bone-Osteosarc(1),Breast-LobularCA(1),Head-SCC(1),Liver-HCC(1),Lung-AdenoCA(1),SoftTissue-Liposarc(1),Stomach-AdenoCA(1),Uterus-AdenoCA(1)
DISRUPTION	'KCNMB2	33	Prost-AdenoCA(8),Breast-AdenoCA(7),Panc-AdenoCA(5),Lung-SCC(4),Liver-HCC(3),Eso-AdenoCA(2),Bone-Osteosarc(1),Head-SCC(1),Lung-AdenoCA(1),Skin-Melanoma(1)
DISRUPTION	'RB1	33	Breast-AdenoCA(7),Ovary-AdenoCA(5),Panc-AdenoCA(5),Bone-Osteosarc(3),Liver-HCC(2),Biliary-AdenoCA(1),ColoRect-AdenoCA(1),Eso-AdenoCA(1),Kidney-ChRCC(1),Lung-AdenoCA(1),Lung-SCC(1),Lymph-BNHL(1),Prost-AdenoCA(1),Skin-Melanoma(1),SoftTissue-Liposarc(1),Uterus-AdenoCA(1)
DISRUPTION	'SUPT3H	33	Breast-AdenoCA(9),ColoRect-AdenoCA(3),Eso-AdenoCA(3),Panc-AdenoCA(3),Bone-Osteosarc(2),Skin-Melanoma(2),SoftTissue-Liposarc(2),Bone-Benign(1),CNS-GBM(1),Kidney-RCC(1),Liver-HCC(1),Ovary-AdenoCA(1),Prost-AdenoCA(1),SoftTissue-Leiomyo(1),Stomach-AdenoCA(1),Uterus-AdenoCA(1)
FUSION_5	'CACNA1A	33	Skin-Melanoma(11),Ovary-AdenoCA(7),Breast-AdenoCA(4),Prost-AdenoCA(4),Kidney-RCC(3),Bone-Osteosarc(1),CNS-GBM(1),Liver-HCC(1),Stomach-AdenoCA(1)
FUSION_5	'FAM19A2	33	SoftTissue-Liposarc(22),Breast-AdenoCA(2),CNS-GBM(2),Panc-AdenoCA(2),Bone-Osteosarc(1),Lymph-BNHL(1),Ovary-AdenoCA(1),Prost-AdenoCA(1),Skin-Melanoma(1)
FUSION_3	'AC096579.13	33	Lymph-BNHL(19),Lymph-CLL(13),Ovary-AdenoCA(1)
FUSION_3	'IKZF3	33	Breast-AdenoCA(9),Eso-AdenoCA(8),Stomach-AdenoCA(8),Head-SCC(2),Uterus-AdenoCA(2),Biliary-AdenoCA(1),Bone-Osteosarc(1),Lymph-BNHL(1),Ovary-AdenoCA(1)
FUSION_3	'SYT1	33	SoftTissue-Liposarc(22),Bone-Osteosarc(5),Breast-AdenoCA(2),Ovary-AdenoCA(2),Liver-HCC(1),Prost-AdenoCA(1)
FUSION_3	'TRHDE	33	SoftTissue-Liposarc(20),Skin-Melanoma(5),Bone-Osteosarc(2),Panc-AdenoCA(2),CNS-Medullo(1),Liver-HCC(1),Lung-AdenoCA(1),Lung-SCC(1)
DISRUPTION	'ANK3	32	Prost-AdenoCA(6),Eso-AdenoCA(4),Panc-AdenoCA(4),Breast-AdenoCA(3),Ovary-AdenoCA(3),Stomach-AdenoCA(3),Liver-HCC(2),Bone-Osteosarc(1),ColoRect-AdenoCA(1),Head-SCC(1),Kidney-RCC(1),Lung-SCC(1),Lymph-BNHL(1),Uterus-AdenoCA(1)
DISRUPTION	'ASCC3	32	Breast-AdenoCA(5),Liver-HCC(4),Uterus-AdenoCA(3),Bone-Osteosarc(2),Eso-AdenoCA(2),Ovary-AdenoCA(2),Prost-AdenoCA(2),Stomach-AdenoCA(2),Biliary-AdenoCA(1),Bladder-TCC(1),Cervix-SCC(1),Head-SCC(1),Kidney-RCC(1),Lung-SCC(1),Lymph-BNHL(1),Lymph-CLL(1),Skin-Melanoma(1),SoftTissue-Liposarc(1)
DISRUPTION	'CTNNA2	32	Prost-AdenoCA(6),Lung-SCC(5),Ovary-AdenoCA(4),Skin-Melanoma(4),Bone-Osteosarc(2),Breast-AdenoCA(2),Liver-HCC(2),Panc-AdenoCA(2),CNS-Medullo(1),Head-SCC(1),Lymph-BNHL(1),Stomach-AdenoCA(1),Uterus-AdenoCA(1)
DISRUPTION	'ESRRG	32	Prost-AdenoCA(9),Breast-AdenoCA(5),Liver-HCC(3),Ovary-AdenoCA(3),Bone-Osteosarc(2),Skin-Melanoma(2),Biliary-AdenoCA(1),Breast-LobularCA(1),CNS-GBM(1),ColoRect-AdenoCA(1),Kidney-RCC(1),Lung-AdenoCA(1),Lung-SCC(1),Lymph-BNHL(1)
DISRUPTION	'FAF1	32	Breast-AdenoCA(7),Liver-HCC(6),Prost-AdenoCA(4),Skin-Melanoma(3),Eso-AdenoCA(2),Lung-SCC(2),Ovary-AdenoCA(2),Biliary-AdenoCA(1),Bone-Osteosarc(1),CNS-GBM(1),Kidney-ChRCC(1),Panc-AdenoCA(1),Panc-Endocrine(1)
DISRUPTION	'GLIS3	32	Breast-AdenoCA(5),Liver-HCC(4),Skin-Melanoma(4),Ovary-AdenoCA(3),Panc-AdenoCA(3),SoftTissue-Liposarc(3),Bone-Osteosarc(2),Prost-AdenoCA(2),Stomach-AdenoCA(2),Biliary-AdenoCA(1),CNS-Oligo(1),Lung-SCC(1),SoftTissue-Leiomyo(1)
DISRUPTION	'KB-1047C11.2	32	Prost-AdenoCA(6),Liver-HCC(3),Lung-AdenoCA(3),Ovary-AdenoCA(3),Panc-AdenoCA(3),Stomach-AdenoCA(3),Bladder-TCC(2),Bone-Osteosarc(2),Breast-AdenoCA(2),Skin-Melanoma(2),Biliary-AdenoCA(1),Eso-AdenoCA(1),Panc-Endocrine(1)
DISRUPTION	'KCNMA1	32	Breast-AdenoCA(6),Ovary-AdenoCA(5),Liver-HCC(4),Prost-AdenoCA(3),Stomach-AdenoCA(3),Uterus-AdenoCA(3),Panc-AdenoCA(2),Skin-Melanoma(2),ColoRect-AdenoCA(1),Eso-AdenoCA(1),Lymph-BNHL(1),SoftTissue-Leiomyo(1)
DISRUPTION	'LARGE	32	Breast-AdenoCA(4),Ovary-AdenoCA(4),Panc-AdenoCA(4),Eso-AdenoCA(3),Skin-Melanoma(3),Head-SCC(2),Lung-SCC(2),SoftTissue-Liposarc(2),Bladder-TCC(1),Bone-Epith(1),Bone-Osteosarc(1),Liver-HCC(1),Lung-AdenoCA(1),Prost-AdenoCA(1),Stomach-AdenoCA(1),Uterus-AdenoCA(1)
DISRUPTION	'LINC00290	32	Prost-AdenoCA(9),Skin-Melanoma(7),Ovary-AdenoCA(3),Panc-Endocrine(3),Uterus-AdenoCA(3),Breast-AdenoCA(2),Bone-Osteosarc(1),Eso-AdenoCA(1),Liver-HCC(1),Lymph-BNHL(1),Stomach-AdenoCA(1)
DISRUPTION	'PTK2	32	Panc-AdenoCA(6),Breast-AdenoCA(5),Liver-HCC(4),Ovary-AdenoCA(4),Skin-Melanoma(3),Bone-Osteosarc(2),Prost-AdenoCA(2),Stomach-AdenoCA(2),Bladder-TCC(1),Eso-AdenoCA(1),Head-SCC(1),Lung-SCC(1)
DISRUPTION	'RIMS2	32	Breast-AdenoCA(6),Ovary-AdenoCA(5),Liver-HCC(3),Lung-AdenoCA(3),Bladder-TCC(2),Bone-Osteosarc(2),Panc-AdenoCA(2),Prost-AdenoCA(2),ColoRect-AdenoCA(1),Eso-AdenoCA(1),Kidney-ChRCC(1),Lung-SCC(1),Lymph-BNHL(1),SoftTissue-Liposarc(1),Stomach-AdenoCA(1)
DISRUPTION	'RP11-611E13.2	32	SoftTissue-Liposarc(13),Bone-Osteosarc(4),Eso-AdenoCA(3),Skin-Melanoma(3),Breast-AdenoCA(2),Stomach-AdenoCA(2),CNS-GBM(1),Lung-AdenoCA(1),Lung-SCC(1),Panc-AdenoCA(1),Uterus-AdenoCA(1)
DISRUPTION	'TENM3	32	Prost-AdenoCA(10),Skin-Melanoma(5),Liver-HCC(4),Breast-AdenoCA(3),Panc-Endocrine(2),Stomach-AdenoCA(2),Bladder-TCC(1),Bone-Benign(1),ColoRect-AdenoCA(1),Ovary-AdenoCA(1),Panc-AdenoCA(1),SoftTissue-Liposarc(1)
DISRUPTION	'TRIO	32	Prost-AdenoCA(5),SoftTissue-Liposarc(5),Skin-Melanoma(4),Breast-AdenoCA(3),CNS-Medullo(2),Lung-AdenoCA(2),Lung-SCC(2),Panc-AdenoCA(2),Uterus-AdenoCA(2),Bone-Osteosarc(1),Kidney-ChRCC(1),Ovary-AdenoCA(1),Panc-Endocrine(1),Stomach-AdenoCA(1)
DISRUPTION	'TRPM3	32	Prost-AdenoCA(6),Eso-AdenoCA(4),Ovary-AdenoCA(4),SoftTissue-Liposarc(4),Breast-AdenoCA(3),Bone-Osteosarc(2),Liver-HCC(2),Panc-AdenoCA(2),Lung-AdenoCA(1),Lung-SCC(1),Lymph-BNHL(1),SoftTissue-Leiomyo(1),Stomach-AdenoCA(1)
DISRUPTION	'VPS13B	32	Breast-AdenoCA(9),Stomach-AdenoCA(4),Eso-AdenoCA(2),Lung-AdenoCA(2),Ovary-AdenoCA(2),Panc-AdenoCA(2),Bladder-TCC(1),Bone-Osteosarc(1),Breast-LobularCA(1),CNS-Medullo(1),Cervix-SCC(1),Head-SCC(1),Kidney-RCC(1),Lymph-BNHL(1),Prost-AdenoCA(1),Skin-Melanoma(1),SoftTissue-Liposarc(1)
EXON_SKIP	'CTNNA3	32	Eso-AdenoCA(11),Stomach-AdenoCA(5),Breast-AdenoCA(3),Lymph-BNHL(3),Liver-HCC(2),ColoRect-AdenoCA(1),Head-SCC(1),Lung-SCC(1),Panc-AdenoCA(1),Prost-AdenoCA(1),Skin-Melanoma(1),SoftTissue-Leiomyo(1),Uterus-AdenoCA(1)
EXON_SKIP	'RUNX1	32	Eso-AdenoCA(18),Breast-AdenoCA(6),Liver-HCC(2),Bladder-TCC(1),Bone-Epith(1),Myeloid-MDS(1),Panc-AdenoCA(1),SoftTissue-Liposarc(1),Stomach-AdenoCA(1)
FUSION_5	'ANKS1B	32	Skin-Melanoma(11),Prost-AdenoCA(8),Breast-AdenoCA(3),SoftTissue-Liposarc(3),Uterus-AdenoCA(3),Ovary-AdenoCA(2),Bone-Osteosarc(1),Liver-HCC(1)
FUSION_5	'RP11-362K2.2	32	CNS-GBM(13),SoftTissue-Liposarc(12),Lung-SCC(2),Prost-AdenoCA(2),Breast-AdenoCA(1),Lymph-BNHL(1),Panc-AdenoCA(1)
FUSION_3	'CA10	32	Breast-AdenoCA(9),Prost-AdenoCA(8),Panc-AdenoCA(6),Eso-AdenoCA(4),Skin-Melanoma(3),Ovary-AdenoCA(2)
DISRUPTION	'CNBD1	31	Prost-AdenoCA(11),Breast-AdenoCA(7),Liver-HCC(3),Eso-AdenoCA(2),Lung-AdenoCA(2),Ovary-AdenoCA(2),Bladder-TCC(1),Lung-SCC(1),Skin-Melanoma(1),Stomach-AdenoCA(1)
DISRUPTION	'CTNNA3	31	Ovary-AdenoCA(5),Eso-AdenoCA(4),Prost-AdenoCA(4),Stomach-AdenoCA(4),Breast-AdenoCA(3),Panc-AdenoCA(3),Head-SCC(2),Lymph-BNHL(2),Bone-Osteosarc(1),CNS-Oligo(1),SoftTissue-Leiomyo(1),Uterus-AdenoCA(1)
DISRUPTION	'IKZF3	31	Breast-AdenoCA(11),Eso-AdenoCA(4),Head-SCC(3),Panc-AdenoCA(3),Stomach-AdenoCA(3),Bladder-TCC(2),Ovary-AdenoCA(2),Bone-Osteosarc(1),SoftTissue-Leiomyo(1),SoftTissue-Liposarc(1)
DISRUPTION	'NPAS3	31	Breast-AdenoCA(7),Ovary-AdenoCA(4),Panc-AdenoCA(4),Liver-HCC(3),Head-SCC(2),Lung-AdenoCA(2),Biliary-AdenoCA(1),Breast-LobularCA(1),CNS-GBM(1),Kidney-RCC(1),Lung-SCC(1),Skin-Melanoma(1),SoftTissue-Leiomyo(1),SoftTissue-Liposarc(1),Stomach-AdenoCA(1)
DISRUPTION	'PDZD2	31	Bone-Osteosarc(4),Ovary-AdenoCA(4),Skin-Melanoma(4),SoftTissue-Liposarc(4),Breast-AdenoCA(3),Lung-AdenoCA(2),Prost-AdenoCA(2),Uterus-AdenoCA(2),Biliary-AdenoCA(1),Head-SCC(1),Liver-HCC(1),Lung-SCC(1),Panc-Endocrine(1),Stomach-AdenoCA(1)
DISRUPTION	'PTPRM	31	Panc-AdenoCA(7),Ovary-AdenoCA(5),Breast-AdenoCA(3),SoftTissue-Liposarc(3),Bone-Osteosarc(2),Eso-AdenoCA(2),Liver-HCC(2),Stomach-AdenoCA(2),Head-SCC(1),Lung-SCC(1),Skin-Melanoma(1),SoftTissue-Leiomyo(1),Uterus-AdenoCA(1)
DISRUPTION	'PTPRR	31	SoftTissue-Liposarc(8),Prost-AdenoCA(4),Skin-Melanoma(4),Breast-AdenoCA(3),Lung-AdenoCA(3),Bone-Osteosarc(2),Breast-LobularCA(1),CNS-GBM(1),ColoRect-AdenoCA(1),Liver-HCC(1),Lung-SCC(1),Stomach-AdenoCA(1),Uterus-AdenoCA(1)
DISRUPTION	'RBBP8	31	Panc-AdenoCA(11),Eso-AdenoCA(5),Liver-HCC(3),Prost-AdenoCA(2),Bone-Epith(1),Bone-Osteosarc(1),Breast-AdenoCA(1),ColoRect-AdenoCA(1),Head-SCC(1),Lymph-BNHL(1),Ovary-AdenoCA(1),Panc-Endocrine(1),SoftTissue-Leiomyo(1),SoftTissue-Liposarc(1)
DISRUPTION	'RP11-362K2.2	31	SoftTissue-Liposarc(8),Bone-Osteosarc(5),CNS-GBM(4),Prost-AdenoCA(4),Panc-AdenoCA(3),Breast-AdenoCA(2),Ovary-AdenoCA(2),Bladder-TCC(1),Skin-Melanoma(1),Stomach-AdenoCA(1)
DISRUPTION	'RP11-739L10.1	31	Panc-AdenoCA(11),Eso-AdenoCA(5),Ovary-AdenoCA(3),Breast-AdenoCA(2),Liver-HCC(2),Bone-Epith(1),Bone-Osteosarc(1),Head-SCC(1),Lung-AdenoCA(1),Lung-SCC(1),Lymph-BNHL(1),SoftTissue-Liposarc(1),Stomach-AdenoCA(1)
DISRUPTION	'RYR2	31	Breast-AdenoCA(4),Skin-Melanoma(4),Liver-HCC(3),SoftTissue-Liposarc(3),Bone-Osteosarc(2),CNS-Medullo(2),Prost-AdenoCA(2),Biliary-AdenoCA(1),CNS-GBM(1),Eso-AdenoCA(1),Head-SCC(1),Lung-AdenoCA(1),Lung-SCC(1),Lymph-BNHL(1),Ovary-AdenoCA(1),Panc-AdenoCA(1),Panc-Endocrine(1),Stomach-AdenoCA(1)
DISRUPTION	'TENM2	31	Prost-AdenoCA(8),Eso-AdenoCA(4),Ovary-AdenoCA(3),Skin-Melanoma(3),Breast-AdenoCA(2),Liver-HCC(2),Panc-AdenoCA(2),SoftTissue-Liposarc(2),Bladder-TCC(1),Bone-Epith(1),CNS-Medullo(1),Lung-SCC(1),Stomach-AdenoCA(1)
DISRUPTION	'TP53	31	Prost-AdenoCA(21),Bone-Osteosarc(4),Bone-Benign(1),Breast-AdenoCA(1),Liver-HCC(1),Ovary-AdenoCA(1),Panc-AdenoCA(1),Uterus-AdenoCA(1)
DISRUPTION	'TSPAN8	31	SoftTissue-Liposarc(9),Breast-AdenoCA(4),Eso-AdenoCA(3),Ovary-AdenoCA(3),CNS-GBM(2),Liver-HCC(2),Lung-AdenoCA(2),Bladder-TCC(1),Bone-Osteosarc(1),Lung-SCC(1),Skin-Melanoma(1),Stomach-AdenoCA(1),Uterus-AdenoCA(1)
DISRUPTION	'ZBTB20	31	Prost-AdenoCA(8),Breast-AdenoCA(6),Ovary-AdenoCA(4),Panc-AdenoCA(3),CNS-Medullo(2),Liver-HCC(2),Uterus-AdenoCA(2),Bone-Benign(1),Lung-AdenoCA(1),Lymph-BNHL(1),SoftTissue-Liposarc(1)
FUSION_5	'KCNMB2	31	Prost-AdenoCA(19),Panc-AdenoCA(4),Eso-AdenoCA(3),Bone-Osteosarc(1),Breast-AdenoCA(1),Liver-HCC(1),Lung-SCC(1),Ovary-AdenoCA(1)
FUSION_3	'BCL2	31	Lymph-BNHL(26),Lymph-CLL(2),Uterus-AdenoCA(2),Liver-HCC(1)
FUSION_3	'DNM3	31	SoftTissue-Liposarc(22),Ovary-AdenoCA(2),Biliary-AdenoCA(1),Bladder-TCC(1),ColoRect-AdenoCA(1),Liver-HCC(1),Panc-AdenoCA(1),Prost-AdenoCA(1),Uterus-AdenoCA(1)
FUSION_3	'RP11-202H2.1	31	SoftTissue-Liposarc(18),Bone-Osteosarc(7),Skin-Melanoma(4),Breast-AdenoCA(1),Prost-AdenoCA(1)
FUSION_3	'TPH2	31	SoftTissue-Liposarc(19),Skin-Melanoma(6),Breast-AdenoCA(2),Stomach-AdenoCA(2),Eso-AdenoCA(1),Panc-AdenoCA(1)
DISRUPTION	'BICD1	30	Prost-AdenoCA(10),Ovary-AdenoCA(3),Panc-AdenoCA(3),Skin-Melanoma(3),Eso-AdenoCA(2),Stomach-AdenoCA(2),Bladder-TCC(1),Breast-AdenoCA(1),CNS-GBM(1),CNS-Medullo(1),Head-SCC(1),Liver-HCC(1),SoftTissue-Liposarc(1)
DISRUPTION	'EGFR	30	CNS-GBM(14),Eso-AdenoCA(6),Breast-AdenoCA(3),Head-SCC(2),Liver-HCC(1),Lung-AdenoCA(1),Prost-AdenoCA(1),Skin-Melanoma(1),Uterus-AdenoCA(1)
DISRUPTION	'KIF26B	30	Ovary-AdenoCA(4),Breast-AdenoCA(3),Liver-HCC(3),Lung-SCC(3),Stomach-AdenoCA(3),Lung-AdenoCA(2),Panc-AdenoCA(2),Prost-AdenoCA(2),SoftTissue-Liposarc(2),Bladder-TCC(1),Bone-Osteosarc(1),CNS-GBM(1),ColoRect-AdenoCA(1),Eso-AdenoCA(1),Panc-Endocrine(1)
DISRUPTION	'MSI2	30	Breast-AdenoCA(11),Liver-HCC(4),Ovary-AdenoCA(3),Prost-AdenoCA(2),SoftTissue-Liposarc(2),Bone-Osteosarc(1),Breast-DCIS(1),Eso-AdenoCA(1),Kidney-RCC(1),Lung-SCC(1),Skin-Melanoma(1),Stomach-AdenoCA(1),Uterus-AdenoCA(1)
DISRUPTION	'NAV2	30	Ovary-AdenoCA(6),Breast-AdenoCA(5),Panc-AdenoCA(5),Bone-Osteosarc(3),Liver-HCC(2),Skin-Melanoma(2),SoftTissue-Liposarc(2),Eso-AdenoCA(1),Lung-AdenoCA(1),Lung-SCC(1),Lymph-BNHL(1),Uterus-AdenoCA(1)
DISRUPTION	'PLD5	30	Prost-AdenoCA(10),Breast-AdenoCA(3),CNS-GBM(2),Eso-AdenoCA(2),Liver-HCC(2),Ovary-AdenoCA(2),Panc-AdenoCA(2),Biliary-AdenoCA(1),Bone-Osteosarc(1),ColoRect-AdenoCA(1),Kidney-RCC(1),Skin-Melanoma(1),SoftTissue-Leiomyo(1),SoftTissue-Liposarc(1)
DISRUPTION	'RABGAP1L	30	Breast-AdenoCA(4),Panc-AdenoCA(3),Prost-AdenoCA(3),SoftTissue-Liposarc(3),Bone-Osteosarc(2),Eso-AdenoCA(2),Liver-HCC(2),Lung-AdenoCA(2),Panc-Endocrine(2),Skin-Melanoma(2),Bone-Benign(1),Head-SCC(1),Lung-SCC(1),Lymph-BNHL(1),SoftTissue-Leiomyo(1)
DISRUPTION	'RP11-30J20.1	30	Breast-AdenoCA(6),Eso-AdenoCA(4),Panc-AdenoCA(4),Liver-HCC(3),Ovary-AdenoCA(3),Lung-AdenoCA(2),Uterus-AdenoCA(2),Cervix-SCC(1),Head-SCC(1),Kidney-ChRCC(1),Prost-AdenoCA(1),SoftTissue-Liposarc(1),Stomach-AdenoCA(1)
DISRUPTION	'TBC1D5	30	Breast-AdenoCA(5),Ovary-AdenoCA(4),Prost-AdenoCA(4),Liver-HCC(3),SoftTissue-Liposarc(3),Panc-AdenoCA(2),Skin-Melanoma(2),Uterus-AdenoCA(2),Biliary-AdenoCA(1),Bone-Osteosarc(1),Kidney-RCC(1),Panc-Endocrine(1),Stomach-AdenoCA(1)
DISRUPTION	'XKR4	30	Prost-AdenoCA(10),Breast-AdenoCA(3),Liver-HCC(3),Lung-AdenoCA(3),Lung-SCC(2),Ovary-AdenoCA(2),Panc-AdenoCA(2),Stomach-AdenoCA(2),Bone-Osteosarc(1),Kidney-RCC(1),Skin-Melanoma(1)
EXON_SKIP	'GPHN	30	Liver-HCC(9),Eso-AdenoCA(6),ColoRect-AdenoCA(3),Panc-AdenoCA(3),Stomach-AdenoCA(3),Breast-AdenoCA(2),Bladder-TCC(1),Head-SCC(1),Kidney-RCC(1),Lung-SCC(1)
FUSION_3	'ATRNL1	30	Prost-AdenoCA(27),Biliary-AdenoCA(1),Panc-AdenoCA(1),Panc-Endocrine(1)
FUSION_3	'TANC2	30	Breast-AdenoCA(13),Skin-Melanoma(5),SoftTissue-Liposarc(3),Lymph-BNHL(2),Ovary-AdenoCA(2),Panc-AdenoCA(2),Prost-AdenoCA(2),ColoRect-AdenoCA(1)
FUSION_3	'UVRAG	30	Breast-AdenoCA(11),Skin-Melanoma(7),Panc-Endocrine(3),Liver-HCC(2),Panc-AdenoCA(2),ColoRect-AdenoCA(1),Head-SCC(1),Ovary-AdenoCA(1),SoftTissue-Liposarc(1),Uterus-AdenoCA(1)
DISRUPTION	'AC005307.3	29	Ovary-AdenoCA(7),Breast-AdenoCA(4),Uterus-AdenoCA(3),Panc-AdenoCA(2),Skin-Melanoma(2),SoftTissue-Liposarc(2),Stomach-AdenoCA(2),Biliary-AdenoCA(1),Bone-Osteosarc(1),Eso-AdenoCA(1),Head-SCC(1),Liver-HCC(1),Lung-AdenoCA(1),Prost-AdenoCA(1)
DISRUPTION	'AC096559.1	29	Prost-AdenoCA(7),Eso-AdenoCA(5),Breast-AdenoCA(2),Liver-HCC(2),Skin-Melanoma(2),Stomach-AdenoCA(2),Bladder-TCC(1),CNS-GBM(1),CNS-Medullo(1),Kidney-RCC(1),Lung-AdenoCA(1),Lung-SCC(1),Ovary-AdenoCA(1),Panc-AdenoCA(1),SoftTissue-Leiomyo(1)
DISRUPTION	'CDH13	29	Liver-HCC(4),Bone-Osteosarc(3),Ovary-AdenoCA(3),Prost-AdenoCA(3),Skin-Melanoma(3),Breast-AdenoCA(2),Head-SCC(2),Lung-SCC(2),Stomach-AdenoCA(2),ColoRect-AdenoCA(1),Eso-AdenoCA(1),Kidney-RCC(1),Panc-AdenoCA(1),SoftTissue-Liposarc(1)
DISRUPTION	'COL14A1	29	Ovary-AdenoCA(6),Breast-AdenoCA(5),Eso-AdenoCA(3),Stomach-AdenoCA(3),Liver-HCC(2),Panc-AdenoCA(2),Biliary-AdenoCA(1),Bladder-TCC(1),ColoRect-AdenoCA(1),Lung-AdenoCA(1),Prost-AdenoCA(1),Skin-Melanoma(1),SoftTissue-Liposarc(1),Uterus-AdenoCA(1)
DISRUPTION	'DSCAM	29	Breast-AdenoCA(5),Panc-AdenoCA(5),Prost-AdenoCA(5),Ovary-AdenoCA(3),Eso-AdenoCA(2),Breast-LobularCA(1),Cervix-SCC(1),ColoRect-AdenoCA(1),Kidney-RCC(1),Liver-HCC(1),Lung-SCC(1),Skin-Melanoma(1),SoftTissue-Leiomyo(1),Stomach-AdenoCA(1)
DISRUPTION	'GRM5	29	Breast-AdenoCA(6),Skin-Melanoma(6),Prost-AdenoCA(5),Head-SCC(3),Panc-AdenoCA(2),Bone-Osteosarc(1),Breast-LobularCA(1),CNS-GBM(1),Eso-AdenoCA(1),Lymph-BNHL(1),Ovary-AdenoCA(1),Stomach-AdenoCA(1)
DISRUPTION	'RBMS3	29	Breast-AdenoCA(7),Prost-AdenoCA(6),Panc-AdenoCA(4),Skin-Melanoma(4),Stomach-AdenoCA(2),Bone-Osteosarc(1),ColoRect-AdenoCA(1),Eso-AdenoCA(1),Head-SCC(1),Kidney-ChRCC(1),Ovary-AdenoCA(1)
DISRUPTION	'RP11-767I20.1	29	SoftTissue-Liposarc(7),Bone-Osteosarc(5),CNS-GBM(4),Prost-AdenoCA(4),Panc-AdenoCA(3),Breast-AdenoCA(2),Bladder-TCC(1),Ovary-AdenoCA(1),Skin-Melanoma(1),Stomach-AdenoCA(1)
DISRUPTION	'TPH2	29	SoftTissue-Liposarc(11),Breast-AdenoCA(6),Bone-Osteosarc(3),Eso-AdenoCA(2),Ovary-AdenoCA(2),Lung-AdenoCA(1),Lymph-BNHL(1),Panc-AdenoCA(1),Skin-Melanoma(1),Stomach-AdenoCA(1)
DISRUPTION	'ZNF521	29	Panc-AdenoCA(16),Breast-AdenoCA(2),Eso-AdenoCA(2),Ovary-AdenoCA(2),Head-SCC(1),Kidney-RCC(1),Liver-HCC(1),Myeloid-MPN(1),Prost-AdenoCA(1),SoftTissue-Liposarc(1),Stomach-AdenoCA(1)
ITD	'LRP1B	29	Lung-SCC(6),Liver-HCC(4),Ovary-AdenoCA(4),Eso-AdenoCA(3),CNS-GBM(2),Head-SCC(2),Stomach-AdenoCA(2),Bone-Osteosarc(1),Breast-AdenoCA(1),Cervix-SCC(1),Lung-AdenoCA(1),Panc-AdenoCA(1),Uterus-AdenoCA(1)
ITD	'RAD51B	29	Breast-AdenoCA(10),Stomach-AdenoCA(6),Eso-AdenoCA(3),Ovary-AdenoCA(3),Uterus-AdenoCA(2),Bone-Osteosarc(1),ColoRect-AdenoCA(1),Liver-HCC(1),Lung-AdenoCA(1),Lymph-BNHL(1)
FUSION_5	'CNTNAP2	29	Liver-HCC(5),Bone-Osteosarc(4),Breast-AdenoCA(4),Prost-AdenoCA(4),Skin-Melanoma(4),Head-SCC(2),Panc-AdenoCA(2),CNS-GBM(1),Lung-AdenoCA(1),Lung-SCC(1),Ovary-AdenoCA(1)
FUSION_5	'LINC00511	29	Prost-AdenoCA(10),Eso-AdenoCA(4),Bladder-TCC(3),Panc-AdenoCA(3),Stomach-AdenoCA(3),Breast-AdenoCA(2),Bone-Osteosarc(1),Head-SCC(1),Skin-Melanoma(1),Uterus-AdenoCA(1)
FUSION_5	'PCDH15	29	Prost-AdenoCA(11),Breast-AdenoCA(6),Lymph-BNHL(4),Bone-Osteosarc(2),Ovary-AdenoCA(2),Head-SCC(1),Liver-HCC(1),Lung-AdenoCA(1),Stomach-AdenoCA(1)
FUSION_5	'RERE	29	Prost-AdenoCA(13),CNS-GBM(5),Liver-HCC(3),Ovary-AdenoCA(3),Bone-Osteosarc(2),Biliary-AdenoCA(1),Breast-LobularCA(1),Panc-AdenoCA(1)
FUSION_5	'RP11-202H2.1	29	SoftTissue-Liposarc(16),Bone-Osteosarc(4),Skin-Melanoma(4),Panc-AdenoCA(2),Cervix-SCC(1),Eso-AdenoCA(1),Prost-AdenoCA(1)
FUSION_5	'TSPAN8	29	SoftTissue-Liposarc(10),Skin-Melanoma(6),Bone-Osteosarc(5),Liver-HCC(2),Lung-SCC(2),Breast-AdenoCA(1),CNS-GBM(1),Eso-AdenoCA(1),Stomach-AdenoCA(1)
FUSION_3	'NF1	29	Ovary-AdenoCA(4),Uterus-AdenoCA(4),Eso-AdenoCA(3),Panc-AdenoCA(3),Prost-AdenoCA(3),Skin-Melanoma(3),Breast-AdenoCA(2),Lung-AdenoCA(2),CNS-GBM(1),Liver-HCC(1),Lung-SCC(1),SoftTissue-Liposarc(1),Stomach-AdenoCA(1)
FUSION_3	'PPFIA2	29	SoftTissue-Liposarc(17),Stomach-AdenoCA(5),Breast-AdenoCA(3),Bone-Osteosarc(1),Liver-HCC(1),Ovary-AdenoCA(1),Prost-AdenoCA(1)
DISRUPTION	'ARHGAP42	28	Prost-AdenoCA(11),Ovary-AdenoCA(3),Skin-Melanoma(3),Breast-AdenoCA(2),Head-SCC(2),CNS-GBM(1),Cervix-SCC(1),Eso-AdenoCA(1),Kidney-RCC(1),Panc-AdenoCA(1),Stomach-AdenoCA(1),Uterus-AdenoCA(1)
DISRUPTION	'CCDC26	28	Panc-AdenoCA(7),Skin-Melanoma(4),Prost-AdenoCA(3),Bone-Osteosarc(2),Breast-AdenoCA(2),Liver-HCC(2),Ovary-AdenoCA(2),Stomach-AdenoCA(2),Lung-AdenoCA(1),Lung-SCC(1),Myeloid-AML(1),SoftTissue-Liposarc(1)
DISRUPTION	'ERC1	28	Prost-AdenoCA(7),Breast-AdenoCA(4),Panc-AdenoCA(2),SoftTissue-Leiomyo(2),Thy-AdenoCA(2),Biliary-AdenoCA(1),Bladder-TCC(1),CNS-Medullo(1),ColoRect-AdenoCA(1),Kidney-ChRCC(1),Liver-HCC(1),Lung-SCC(1),Ovary-AdenoCA(1),Skin-Melanoma(1),SoftTissue-Liposarc(1),Uterus-AdenoCA(1)
DISRUPTION	'FOXP2	28	Prost-AdenoCA(12),Eso-AdenoCA(3),SoftTissue-Liposarc(3),Biliary-AdenoCA(2),Liver-HCC(2),Ovary-AdenoCA(2),Panc-AdenoCA(2),Lung-AdenoCA(1),Skin-Melanoma(1)
DISRUPTION	'MMP16	28	Prost-AdenoCA(12),Breast-AdenoCA(2),Eso-AdenoCA(2),Liver-HCC(2),Panc-AdenoCA(2),SoftTissue-Liposarc(2),Bone-Osteosarc(1),Lung-AdenoCA(1),Lung-SCC(1),Ovary-AdenoCA(1),Stomach-AdenoCA(1),Uterus-AdenoCA(1)
DISRUPTION	'NBEA	28	Prost-AdenoCA(5),Stomach-AdenoCA(5),Panc-AdenoCA(4),Eso-AdenoCA(3),Ovary-AdenoCA(2),Skin-Melanoma(2),Bone-Osteosarc(1),Breast-AdenoCA(1),ColoRect-AdenoCA(1),Head-SCC(1),Kidney-ChRCC(1),Lymph-BNHL(1),SoftTissue-Liposarc(1)
DISRUPTION	'NSMCE2	28	Ovary-AdenoCA(5),Prost-AdenoCA(5),Breast-AdenoCA(4),Liver-HCC(3),Panc-AdenoCA(3),Skin-Melanoma(3),Eso-AdenoCA(2),ColoRect-AdenoCA(1),Stomach-AdenoCA(1),Uterus-AdenoCA(1)
DISRUPTION	'RP11-32K4.1	28	Liver-HCC(6),Prost-AdenoCA(5),Breast-AdenoCA(4),Lung-AdenoCA(4),Panc-AdenoCA(2),Skin-Melanoma(2),Eso-AdenoCA(1),Head-SCC(1),Lymph-BNHL(1),Ovary-AdenoCA(1),SoftTissue-Leiomyo(1)
DISRUPTION	'RP11-758M4.1	28	Prost-AdenoCA(11),Breast-AdenoCA(4),Liver-HCC(2),Ovary-AdenoCA(2),Panc-AdenoCA(2),Cervix-SCC(1),ColoRect-AdenoCA(1),Eso-AdenoCA(1),Lung-AdenoCA(1),Skin-Melanoma(1),SoftTissue-Liposarc(1),Stomach-AdenoCA(1)
DISRUPTION	'RP3-399L15.3	28	Prost-AdenoCA(10),Breast-AdenoCA(4),Ovary-AdenoCA(3),Liver-HCC(2),Lymph-BNHL(2),Bladder-TCC(1),Bone-Osteosarc(1),Cervix-SCC(1),Panc-AdenoCA(1),Panc-Endocrine(1),Skin-Melanoma(1),Uterus-AdenoCA(1)
DISRUPTION	'SLC35F1	28	Prost-AdenoCA(10),Breast-AdenoCA(6),Skin-Melanoma(3),SoftTissue-Liposarc(2),Bone-Osteosarc(1),Breast-LobularCA(1),ColoRect-AdenoCA(1),Eso-AdenoCA(1),Lymph-CLL(1),Ovary-AdenoCA(1),Uterus-AdenoCA(1)
DISRUPTION	'TANC2	28	Breast-AdenoCA(7),Prost-AdenoCA(3),Skin-Melanoma(3),SoftTissue-Liposarc(3),Eso-AdenoCA(2),Bladder-TCC(1),Bone-Osteosarc(1),CNS-GBM(1),ColoRect-AdenoCA(1),Liver-HCC(1),Lung-SCC(1),Lymph-BNHL(1),Ovary-AdenoCA(1),Panc-AdenoCA(1),Stomach-AdenoCA(1)
DISRUPTION	'TTC28	28	Panc-AdenoCA(5),Skin-Melanoma(3),Stomach-AdenoCA(3),Bone-Osteosarc(2),Breast-LobularCA(2),CNS-GBM(2),Liver-HCC(2),Ovary-AdenoCA(2),Prost-AdenoCA(2),Breast-AdenoCA(1),ColoRect-AdenoCA(1),Lung-AdenoCA(1),Lung-SCC(1),Panc-Endocrine(1)
DISRUPTION	'UNC5D	28	Breast-AdenoCA(10),Liver-HCC(4),Eso-AdenoCA(2),Panc-AdenoCA(2),Prost-AdenoCA(2),Stomach-AdenoCA(2),CNS-Medullo(1),Head-SCC(1),Lung-SCC(1),Ovary-AdenoCA(1),SoftTissue-Liposarc(1),Uterus-AdenoCA(1)
EXON_SKIP	'NRG3	28	Panc-AdenoCA(13),Prost-AdenoCA(9),Breast-AdenoCA(2),Stomach-AdenoCA(2),Kidney-ChRCC(1),Uterus-AdenoCA(1)
ITD	'MACROD2	28	Prost-AdenoCA(4),Breast-AdenoCA(3),Liver-HCC(3),Ovary-AdenoCA(3),Panc-AdenoCA(3),Uterus-AdenoCA(3),Bone-Osteosarc(2),Eso-AdenoCA(2),Bladder-TCC(1),CNS-GBM(1),ColoRect-AdenoCA(1),Panc-Endocrine(1),Stomach-AdenoCA(1)
FUSION_5	'LGR5	28	SoftTissue-Liposarc(11),Skin-Melanoma(6),Eso-AdenoCA(4),Bone-Osteosarc(3),Breast-AdenoCA(1),Liver-HCC(1),Lung-SCC(1),Ovary-AdenoCA(1)
FUSION_5	'PVT1	28	Prost-AdenoCA(7),Breast-AdenoCA(5),Eso-AdenoCA(4),CNS-Medullo(2),Liver-HCC(2),Skin-Melanoma(2),Biliary-AdenoCA(1),ColoRect-AdenoCA(1),Panc-AdenoCA(1),SoftTissue-Liposarc(1),Stomach-AdenoCA(1),Uterus-AdenoCA(1)
FUSION_5	'TMEM132B	28	Prost-AdenoCA(11),Bone-Osteosarc(5),SoftTissue-Liposarc(5),Breast-AdenoCA(2),Liver-HCC(2),Lymph-BNHL(1),Skin-Melanoma(1),Uterus-AdenoCA(1)
FUSION_3	'CNTNAP2	28	Skin-Melanoma(6),Breast-AdenoCA(5),Liver-HCC(4),Head-SCC(3),Prost-AdenoCA(3),Bone-Osteosarc(2),CNS-GBM(2),Lymph-BNHL(1),Ovary-AdenoCA(1),SoftTissue-Liposarc(1)
FUSION_3	'FYN	28	Prost-AdenoCA(18),Bone-Osteosarc(3),Ovary-AdenoCA(2),Liver-HCC(1),Lymph-BNHL(1),Panc-AdenoCA(1),Stomach-AdenoCA(1),Uterus-AdenoCA(1)
FUSION_3	'NLGN1	28	Prost-AdenoCA(9),Breast-AdenoCA(5),SoftTissue-Liposarc(5),Liver-HCC(3),Eso-AdenoCA(2),CNS-GBM(1),Panc-AdenoCA(1),Skin-Melanoma(1),Uterus-AdenoCA(1)
FUSION_3	'NRG1	28	Breast-AdenoCA(7),Ovary-AdenoCA(4),Eso-AdenoCA(3),Bladder-TCC(2),Panc-AdenoCA(2),Prost-AdenoCA(2),Skin-Melanoma(2),SoftTissue-Liposarc(2),Breast-LobularCA(1),Head-SCC(1),Liver-HCC(1),Lung-SCC(1)
DISRUPTION	'ABCA13	27	Breast-AdenoCA(5),CNS-GBM(3),Head-SCC(3),Ovary-AdenoCA(3),Skin-Melanoma(3),Prost-AdenoCA(2),Stomach-AdenoCA(2),Bladder-TCC(1),Bone-Osteosarc(1),Eso-AdenoCA(1),Lung-SCC(1),SoftTissue-Liposarc(1),Uterus-AdenoCA(1)
DISRUPTION	'AC096579.13	27	Lymph-CLL(14),Lymph-BNHL(11),Breast-AdenoCA(1),Ovary-AdenoCA(1)
DISRUPTION	'ADAM2	27	Prost-AdenoCA(10),Breast-AdenoCA(4),Panc-AdenoCA(4),Liver-HCC(2),Lung-AdenoCA(2),Bladder-TCC(1),Breast-LobularCA(1),Eso-AdenoCA(1),Lung-SCC(1),Lymph-BNHL(1)
DISRUPTION	'ARID1B	27	Breast-AdenoCA(11),CNS-GBM(3),ColoRect-AdenoCA(2),Stomach-AdenoCA(2),Biliary-AdenoCA(1),Bone-Epith(1),Bone-Osteosarc(1),Cervix-SCC(1),Liver-HCC(1),Lung-SCC(1),Lymph-BNHL(1),Ovary-AdenoCA(1),Prost-AdenoCA(1)
DISRUPTION	'ATRNL1	27	Prost-AdenoCA(11),Ovary-AdenoCA(4),Breast-AdenoCA(3),Panc-AdenoCA(3),Biliary-AdenoCA(1),Bladder-TCC(1),CNS-Medullo(1),Liver-HCC(1),Lymph-BNHL(1),SoftTissue-Liposarc(1)
DISRUPTION	'BNC2	27	Skin-Melanoma(6),Breast-AdenoCA(4),Bone-Osteosarc(3),Ovary-AdenoCA(3),Eso-AdenoCA(2),Stomach-AdenoCA(2),CNS-GBM(1),CNS-Medullo(1),Liver-HCC(1),Lung-AdenoCA(1),Panc-AdenoCA(1),Prost-AdenoCA(1),SoftTissue-Leiomyo(1)
DISRUPTION	'CACNA1C	27	Breast-AdenoCA(8),Ovary-AdenoCA(3),Panc-AdenoCA(3),Skin-Melanoma(2),SoftTissue-Liposarc(2),CNS-Medullo(1),Cervix-SCC(1),ColoRect-AdenoCA(1),Liver-HCC(1),Lung-AdenoCA(1),Lung-SCC(1),Prost-AdenoCA(1),Thy-AdenoCA(1),Uterus-AdenoCA(1)
DISRUPTION	'CNTN1	27	Prost-AdenoCA(5),Panc-AdenoCA(4),Ovary-AdenoCA(3),Stomach-AdenoCA(3),Bone-Osteosarc(2),Breast-AdenoCA(2),Lung-SCC(2),Skin-Melanoma(2),Biliary-AdenoCA(1),CNS-GBM(1),Liver-HCC(1),Uterus-AdenoCA(1)
DISRUPTION	'CPQ	27	Breast-AdenoCA(5),Liver-HCC(5),Ovary-AdenoCA(3),Bone-Osteosarc(2),Lung-AdenoCA(2),Panc-AdenoCA(2),Skin-Melanoma(2),SoftTissue-Liposarc(2),ColoRect-AdenoCA(1),Eso-AdenoCA(1),Stomach-AdenoCA(1),Uterus-AdenoCA(1)
DISRUPTION	'ERBB4	27	Breast-AdenoCA(7),Ovary-AdenoCA(5),Prost-AdenoCA(4),Eso-AdenoCA(3),Head-SCC(2),Uterus-AdenoCA(2),Bone-Osteosarc(1),Liver-HCC(1),Lung-SCC(1),Panc-AdenoCA(1)
DISRUPTION	'HCN1	27	Lung-SCC(5),Skin-Melanoma(5),Ovary-AdenoCA(3),CNS-Medullo(2),Panc-AdenoCA(2),Stomach-AdenoCA(2),Uterus-AdenoCA(2),Bone-Osteosarc(1),Breast-AdenoCA(1),Head-SCC(1),Kidney-ChRCC(1),Kidney-RCC(1),SoftTissue-Liposarc(1)
DISRUPTION	'IFNG-AS1	27	SoftTissue-Liposarc(11),Skin-Melanoma(4),Ovary-AdenoCA(3),Bone-Osteosarc(2),CNS-GBM(2),Eso-AdenoCA(1),Liver-HCC(1),Lung-AdenoCA(1),Prost-AdenoCA(1),Stomach-AdenoCA(1)
DISRUPTION	'KALRN	27	Ovary-AdenoCA(5),Breast-AdenoCA(4),Eso-AdenoCA(3),Panc-AdenoCA(3),Liver-HCC(2),Lung-SCC(2),Skin-Melanoma(2),Uterus-AdenoCA(2),Bone-Osteosarc(1),Kidney-ChRCC(1),Lymph-BNHL(1),Prost-AdenoCA(1)
DISRUPTION	'MGAT4C	27	SoftTissue-Liposarc(10),Bone-Osteosarc(3),Panc-AdenoCA(3),Breast-AdenoCA(2),CNS-GBM(2),Liver-HCC(2),Ovary-AdenoCA(2),Prost-AdenoCA(2),Skin-Melanoma(1)
DISRUPTION	'MLLT3	27	CNS-GBM(5),Prost-AdenoCA(5),Panc-AdenoCA(4),Skin-Melanoma(4),Bladder-TCC(2),Liver-HCC(2),Lung-SCC(2),Breast-AdenoCA(1),SoftTissue-Liposarc(1),Stomach-AdenoCA(1)
DISRUPTION	'NRXN3	27	Panc-AdenoCA(6),Biliary-AdenoCA(3),Breast-AdenoCA(3),Ovary-AdenoCA(3),Skin-Melanoma(3),Bone-Osteosarc(1),Head-SCC(1),Kidney-RCC(1),Liver-HCC(1),Lung-AdenoCA(1),Panc-Endocrine(1),Prost-AdenoCA(1),SoftTissue-Liposarc(1),Uterus-AdenoCA(1)
DISRUPTION	'PCAT1	27	Prost-AdenoCA(5),Breast-AdenoCA(4),CNS-Medullo(4),Eso-AdenoCA(2),Ovary-AdenoCA(2),Panc-AdenoCA(2),Skin-Melanoma(2),Stomach-AdenoCA(2),Bone-Osteosarc(1),CNS-GBM(1),Liver-HCC(1),Uterus-AdenoCA(1)
DISRUPTION	'PRKDC	27	Prost-AdenoCA(8),Liver-HCC(4),Panc-AdenoCA(3),Breast-AdenoCA(2),Eso-AdenoCA(2),Skin-Melanoma(2),Bladder-TCC(1),Bone-Osteosarc(1),ColoRect-AdenoCA(1),Lung-SCC(1),Ovary-AdenoCA(1),Stomach-AdenoCA(1)
DISRUPTION	'SAMD12	27	Breast-AdenoCA(6),Ovary-AdenoCA(3),Panc-AdenoCA(3),Stomach-AdenoCA(3),Liver-HCC(2),Lung-AdenoCA(2),Lung-SCC(2),Bone-Osteosarc(1),Eso-AdenoCA(1),Lymph-BNHL(1),Prost-AdenoCA(1),SoftTissue-Liposarc(1),Uterus-AdenoCA(1)
DISRUPTION	'UVRAG	27	Skin-Melanoma(9),Breast-AdenoCA(8),Ovary-AdenoCA(2),Bladder-TCC(1),Breast-LobularCA(1),Eso-AdenoCA(1),Liver-HCC(1),Lung-SCC(1),Panc-AdenoCA(1),Panc-Endocrine(1),Stomach-AdenoCA(1)
EXON_SKIP	'ANKRD11	27	Breast-AdenoCA(7),Eso-AdenoCA(5),Ovary-AdenoCA(4),Lung-SCC(2),Bone-Osteosarc(1),ColoRect-AdenoCA(1),Kidney-ChRCC(1),Liver-HCC(1),Lung-AdenoCA(1),Skin-Melanoma(1),SoftTissue-Leiomyo(1),Stomach-AdenoCA(1),Uterus-AdenoCA(1)
EXON_SKIP	'CSMD3	27	Prost-AdenoCA(5),Breast-AdenoCA(3),Ovary-AdenoCA(3),Panc-Endocrine(3),Stomach-AdenoCA(3),Cervix-SCC(2),Lung-SCC(2),Biliary-AdenoCA(1),Bone-Osteosarc(1),Eso-AdenoCA(1),Liver-HCC(1),Skin-Melanoma(1),SoftTissue-Liposarc(1)
FUSION_5	'C10orf11	27	Prost-AdenoCA(9),Breast-AdenoCA(7),Stomach-AdenoCA(3),Eso-AdenoCA(2),Liver-HCC(2),Lung-SCC(1),Panc-Endocrine(1),Skin-Melanoma(1),Uterus-AdenoCA(1)
FUSION_5	'EYS	27	Breast-AdenoCA(9),Liver-HCC(4),Ovary-AdenoCA(3),Prost-AdenoCA(3),Bone-Osteosarc(2),Lung-SCC(2),CNS-GBM(1),Panc-AdenoCA(1),SoftTissue-Liposarc(1),Stomach-AdenoCA(1)
FUSION_5	'GRID2	27	Prost-AdenoCA(11),Eso-AdenoCA(5),Breast-AdenoCA(3),Skin-Melanoma(3),SoftTissue-Liposarc(2),Liver-HCC(1),Lung-AdenoCA(1),Panc-AdenoCA(1)
FUSION_3	'FAM19A2	27	SoftTissue-Liposarc(20),CNS-GBM(2),Bone-Osteosarc(1),Breast-AdenoCA(1),Prost-AdenoCA(1),Skin-Melanoma(1),Uterus-AdenoCA(1)
FUSION_3	'PTEN	27	Prost-AdenoCA(15),Breast-AdenoCA(2),Eso-AdenoCA(2),Skin-Melanoma(2),CNS-Medullo(1),Head-SCC(1),Kidney-RCC(1),Lung-SCC(1),Ovary-AdenoCA(1),SoftTissue-Leiomyo(1)
FUSION_3	'RP11-767I20.1	27	CNS-GBM(12),SoftTissue-Liposarc(8),Panc-AdenoCA(2),Skin-Melanoma(2),Bone-Osteosarc(1),Breast-AdenoCA(1),Ovary-AdenoCA(1)
DISRUPTION	'AC007319.1	26	Prost-AdenoCA(9),Breast-AdenoCA(5),Ovary-AdenoCA(2),Panc-AdenoCA(2),Bladder-TCC(1),Bone-Osteosarc(1),Cervix-SCC(1),Eso-AdenoCA(1),Head-SCC(1),Liver-HCC(1),Lung-SCC(1),Skin-Melanoma(1)
DISRUPTION	'CADPS2	26	Prost-AdenoCA(6),Ovary-AdenoCA(4),SoftTissue-Liposarc(3),Eso-AdenoCA(2),Biliary-AdenoCA(1),Bladder-TCC(1),Bone-Osteosarc(1),Breast-AdenoCA(1),Kidney-RCC(1),Liver-HCC(1),Lung-SCC(1),Lymph-BNHL(1),Skin-Melanoma(1),Stomach-AdenoCA(1),Uterus-AdenoCA(1)
DISRUPTION	'CHODL	26	Breast-AdenoCA(5),Panc-AdenoCA(4),Bladder-TCC(2),Cervix-SCC(2),Ovary-AdenoCA(2),Skin-Melanoma(2),Stomach-AdenoCA(2),ColoRect-AdenoCA(1),Eso-AdenoCA(1),Head-SCC(1),Kidney-RCC(1),Lung-SCC(1),Prost-AdenoCA(1),SoftTissue-Liposarc(1)
DISRUPTION	'CTC-340A15.2	26	Prost-AdenoCA(7),Breast-AdenoCA(6),SoftTissue-Liposarc(3),Eso-AdenoCA(2),Bone-Osteosarc(1),CNS-GBM(1),Liver-HCC(1),Ovary-AdenoCA(1),Panc-AdenoCA(1),Panc-Endocrine(1),Skin-Melanoma(1),Stomach-AdenoCA(1)
DISRUPTION	'DNAH14	26	Liver-HCC(5),Panc-AdenoCA(4),Ovary-AdenoCA(3),Skin-Melanoma(3),Breast-AdenoCA(2),SoftTissue-Liposarc(2),Uterus-AdenoCA(2),Bone-Osteosarc(1),Breast-LobularCA(1),Eso-AdenoCA(1),Lung-AdenoCA(1),Prost-AdenoCA(1)
DISRUPTION	'FAM155A	26	Eso-AdenoCA(5),Liver-HCC(4),Ovary-AdenoCA(3),SoftTissue-Liposarc(3),Breast-AdenoCA(2),Panc-AdenoCA(2),Prost-AdenoCA(2),CNS-GBM(1),ColoRect-AdenoCA(1),Kidney-ChRCC(1),Skin-Melanoma(1),Stomach-AdenoCA(1)
DISRUPTION	'FAM19A2	26	SoftTissue-Liposarc(8),Ovary-AdenoCA(5),CNS-GBM(3),Panc-AdenoCA(3),Bone-Osteosarc(2),Eso-AdenoCA(2),Breast-AdenoCA(1),Liver-HCC(1),Prost-AdenoCA(1)
DISRUPTION	'GRM8	26	Breast-AdenoCA(4),Ovary-AdenoCA(4),Prost-AdenoCA(4),Skin-Melanoma(3),SoftTissue-Liposarc(3),Bone-Osteosarc(2),CNS-GBM(1),CNS-Medullo(1),Cervix-SCC(1),Eso-AdenoCA(1),Lymph-BNHL(1),Panc-Endocrine(1)
DISRUPTION	'KCNH7	26	Prost-AdenoCA(12),Breast-AdenoCA(4),Ovary-AdenoCA(4),Liver-HCC(2),Bone-Osteosarc(1),Panc-AdenoCA(1),Panc-Endocrine(1),SoftTissue-Liposarc(1)
DISRUPTION	'LAMA3	26	Panc-AdenoCA(9),Eso-AdenoCA(4),Stomach-AdenoCA(3),Lung-SCC(2),Ovary-AdenoCA(2),Bone-Osteosarc(1),Breast-AdenoCA(1),Liver-HCC(1),Prost-AdenoCA(1),Skin-Melanoma(1),Uterus-AdenoCA(1)
DISRUPTION	'LINC00393	26	Lung-SCC(7),Eso-AdenoCA(5),Stomach-AdenoCA(5),Head-SCC(3),Bladder-TCC(1),Breast-AdenoCA(1),ColoRect-AdenoCA(1),Skin-Melanoma(1),SoftTissue-Liposarc(1),Uterus-AdenoCA(1)
DISRUPTION	'LINC00478	26	Panc-AdenoCA(6),Breast-AdenoCA(3),Ovary-AdenoCA(3),Head-SCC(2),Skin-Melanoma(2),SoftTissue-Leiomyo(2),Bone-Osteosarc(1),Breast-LobularCA(1),CNS-Medullo(1),Eso-AdenoCA(1),Kidney-ChRCC(1),Kidney-RCC(1),Liver-HCC(1),Lung-SCC(1)
DISRUPTION	'LUZP2	26	Breast-AdenoCA(5),Panc-AdenoCA(5),SoftTissue-Liposarc(4),Ovary-AdenoCA(3),Bone-Osteosarc(2),Liver-HCC(2),ColoRect-AdenoCA(1),Head-SCC(1),Lung-SCC(1),Skin-Melanoma(1),Uterus-AdenoCA(1)
DISRUPTION	'MAGI1	26	Prost-AdenoCA(8),Breast-AdenoCA(3),Eso-AdenoCA(3),Bone-Osteosarc(2),Kidney-RCC(2),Lung-AdenoCA(2),Ovary-AdenoCA(2),Stomach-AdenoCA(2),ColoRect-AdenoCA(1),Skin-Melanoma(1)
DISRUPTION	'NF1	26	Breast-AdenoCA(5),Ovary-AdenoCA(5),Eso-AdenoCA(3),Panc-AdenoCA(3),Bone-Osteosarc(2),Uterus-AdenoCA(2),CNS-GBM(1),CNS-Medullo(1),CNS-PiloAstro(1),Lung-AdenoCA(1),Prost-AdenoCA(1),SoftTissue-Liposarc(1)
DISRUPTION	'PHACTR1	26	Breast-AdenoCA(5),Ovary-AdenoCA(3),Skin-Melanoma(3),ColoRect-AdenoCA(2),Eso-AdenoCA(2),Liver-HCC(2),Biliary-AdenoCA(1),Bladder-TCC(1),Cervix-SCC(1),Lung-AdenoCA(1),Lung-SCC(1),Panc-AdenoCA(1),Prost-AdenoCA(1),SoftTissue-Leiomyo(1),SoftTissue-Liposarc(1)
DISRUPTION	'PRKAG2	26	Prost-AdenoCA(5),Ovary-AdenoCA(3),Skin-Melanoma(3),Bone-Osteosarc(2),Breast-AdenoCA(2),Liver-HCC(2),Lung-SCC(2),Biliary-AdenoCA(1),Bone-Epith(1),Eso-AdenoCA(1),Kidney-RCC(1),Panc-AdenoCA(1),SoftTissue-Liposarc(1),Uterus-AdenoCA(1)
DISRUPTION	'PTPRG	26	Ovary-AdenoCA(5),Panc-AdenoCA(4),Prost-AdenoCA(3),ColoRect-AdenoCA(2),Kidney-RCC(2),Stomach-AdenoCA(2),Bladder-TCC(1),Bone-Osteosarc(1),Kidney-ChRCC(1),Liver-HCC(1),Lung-AdenoCA(1),Skin-Melanoma(1),SoftTissue-Liposarc(1),Uterus-AdenoCA(1)
DISRUPTION	'PTPRT	26	Breast-AdenoCA(7),Liver-HCC(5),Ovary-AdenoCA(3),Skin-Melanoma(3),Panc-AdenoCA(2),Bone-Osteosarc(1),ColoRect-AdenoCA(1),Eso-AdenoCA(1),Panc-Endocrine(1),Prost-AdenoCA(1),Stomach-AdenoCA(1)
DISRUPTION	'RERE	26	Biliary-AdenoCA(3),Bone-Osteosarc(3),Liver-HCC(3),Stomach-AdenoCA(3),Skin-Melanoma(2),Uterus-AdenoCA(2),Breast-AdenoCA(1),CNS-GBM(1),ColoRect-AdenoCA(1),Eso-AdenoCA(1),Lung-SCC(1),Lymph-BNHL(1),Ovary-AdenoCA(1),Panc-AdenoCA(1),Panc-Endocrine(1),Prost-AdenoCA(1)
DISRUPTION	'RP11-554D15.1	26	Bone-Osteosarc(4),Breast-AdenoCA(4),Liver-HCC(3),Skin-Melanoma(3),Lymph-BNHL(2),Biliary-AdenoCA(1),CNS-GBM(1),ColoRect-AdenoCA(1),Eso-AdenoCA(1),Ovary-AdenoCA(1),Panc-AdenoCA(1),Prost-AdenoCA(1),SoftTissue-Leiomyo(1),Stomach-AdenoCA(1),Uterus-AdenoCA(1)
DISRUPTION	'ZFPM2	26	Prost-AdenoCA(6),Bone-Osteosarc(2),Breast-AdenoCA(2),Liver-HCC(2),Lung-AdenoCA(2),Ovary-AdenoCA(2),Panc-AdenoCA(2),Biliary-AdenoCA(1),CNS-Medullo(1),ColoRect-AdenoCA(1),Eso-AdenoCA(1),Skin-Melanoma(1),SoftTissue-Liposarc(1),Stomach-AdenoCA(1),Uterus-AdenoCA(1)
DISRUPTION	'ZNF385D	26	Prost-AdenoCA(5),Ovary-AdenoCA(4),Liver-HCC(3),Stomach-AdenoCA(3),Bone-Osteosarc(2),Panc-Endocrine(2),Breast-AdenoCA(1),CNS-Medullo(1),Cervix-SCC(1),Head-SCC(1),Panc-AdenoCA(1),Skin-Melanoma(1),SoftTissue-Leiomyo(1)
EXON_SKIP	'EXOC4	26	ColoRect-AdenoCA(5),Liver-HCC(5),Eso-AdenoCA(4),Stomach-AdenoCA(3),Head-SCC(2),Panc-AdenoCA(2),Bone-Epith(1),Breast-AdenoCA(1),Cervix-SCC(1),Ovary-AdenoCA(1),Skin-Melanoma(1)
EXON_SKIP	'NCKAP5	26	Head-SCC(7),Eso-AdenoCA(5),Lung-SCC(3),Stomach-AdenoCA(2),Breast-AdenoCA(1),ColoRect-AdenoCA(1),Kidney-ChRCC(1),Kidney-RCC(1),Liver-HCC(1),Lung-AdenoCA(1),Panc-AdenoCA(1),Prost-AdenoCA(1),Skin-Melanoma(1)
EXON_SKIP	'SHANK2	26	Head-SCC(6),Liver-HCC(6),Eso-AdenoCA(3),Bladder-TCC(2),Biliary-AdenoCA(1),Breast-AdenoCA(1),Breast-LobularCA(1),Kidney-RCC(1),Lung-SCC(1),Panc-AdenoCA(1),Prost-AdenoCA(1),Skin-Melanoma(1),Stomach-AdenoCA(1)
FUSION_5	'CDH12	26	SoftTissue-Liposarc(8),Bone-Osteosarc(3),Liver-HCC(3),Prost-AdenoCA(3),Skin-Melanoma(3),Ovary-AdenoCA(2),Breast-AdenoCA(1),Eso-AdenoCA(1),Lung-SCC(1),Panc-AdenoCA(1)
FUSION_5	'LRP1B	26	Ovary-AdenoCA(8),Prost-AdenoCA(8),Breast-AdenoCA(3),SoftTissue-Liposarc(2),Bone-Osteosarc(1),Eso-AdenoCA(1),Lung-AdenoCA(1),Panc-AdenoCA(1),Uterus-AdenoCA(1)
FUSION_3	'CDK12	26	Eso-AdenoCA(6),Stomach-AdenoCA(6),Breast-AdenoCA(4),Uterus-AdenoCA(4),Breast-LobularCA(1),ColoRect-AdenoCA(1),Liver-HCC(1),Lung-AdenoCA(1),Lung-SCC(1),Prost-AdenoCA(1)
FUSION_3	'MACROD2	26	Breast-AdenoCA(6),Ovary-AdenoCA(5),Bone-Osteosarc(3),Eso-AdenoCA(2),Panc-AdenoCA(2),Skin-Melanoma(2),CNS-GBM(1),CNS-Medullo(1),ColoRect-AdenoCA(1),Lung-AdenoCA(1),SoftTissue-Leiomyo(1),SoftTissue-Liposarc(1)
FUSION_3	'TMTC2	26	SoftTissue-Liposarc(17),Stomach-AdenoCA(6),Breast-AdenoCA(1),ColoRect-AdenoCA(1),Skin-Melanoma(1)
DISRUPTION	'ACACA	25	Breast-AdenoCA(8),Panc-AdenoCA(3),Prost-AdenoCA(3),Eso-AdenoCA(2),Head-SCC(2),Skin-Melanoma(2),Stomach-AdenoCA(2),Lung-SCC(1),SoftTissue-Liposarc(1),Uterus-AdenoCA(1)
DISRUPTION	'ANKFN1	25	Breast-AdenoCA(8),Ovary-AdenoCA(4),Bladder-TCC(2),Eso-AdenoCA(2),Prost-AdenoCA(2),Biliary-AdenoCA(1),CNS-Medullo(1),ColoRect-AdenoCA(1),Head-SCC(1),Liver-HCC(1),Lymph-BNHL(1),Panc-AdenoCA(1)
DISRUPTION	'ATP8A2	25	Prost-AdenoCA(6),Panc-AdenoCA(3),Breast-AdenoCA(2),Lung-SCC(2),Ovary-AdenoCA(2),SoftTissue-Liposarc(2),Stomach-AdenoCA(2),Bone-Osteosarc(1),CNS-GBM(1),ColoRect-AdenoCA(1),Eso-AdenoCA(1),Lymph-BNHL(1),Skin-Melanoma(1)
DISRUPTION	'CCDC91	25	Stomach-AdenoCA(5),Breast-AdenoCA(3),Panc-AdenoCA(3),Lung-SCC(2),Prost-AdenoCA(2),Skin-Melanoma(2),Bladder-TCC(1),Bone-Osteosarc(1),CNS-Medullo(1),Head-SCC(1),Liver-HCC(1),Lymph-BNHL(1),Ovary-AdenoCA(1),SoftTissue-Liposarc(1)
DISRUPTION	'DPYD	25	Liver-HCC(5),Breast-AdenoCA(2),Eso-AdenoCA(2),Lung-SCC(2),Ovary-AdenoCA(2),Prost-AdenoCA(2),Biliary-AdenoCA(1),Bone-Osteosarc(1),CNS-Medullo(1),ColoRect-AdenoCA(1),Head-SCC(1),Kidney-RCC(1),Lymph-BNHL(1),Skin-Melanoma(1),SoftTissue-Liposarc(1),Stomach-AdenoCA(1)
DISRUPTION	'EGFEM1P	25	Ovary-AdenoCA(6),Uterus-AdenoCA(3),Lung-SCC(2),Panc-AdenoCA(2),Prost-AdenoCA(2),SoftTissue-Leiomyo(2),SoftTissue-Liposarc(2),Bone-Osteosarc(1),Breast-AdenoCA(1),Liver-HCC(1),Lymph-BNHL(1),Lymph-CLL(1),Skin-Melanoma(1)
DISRUPTION	'ETV6	25	Breast-AdenoCA(7),Prost-AdenoCA(5),Liver-HCC(3),Lymph-BNHL(2),Ovary-AdenoCA(2),Uterus-AdenoCA(2),Bone-Osteosarc(1),ColoRect-AdenoCA(1),Lung-SCC(1),SoftTissue-Liposarc(1)
DISRUPTION	'GRM7	25	Prost-AdenoCA(6),Liver-HCC(3),Breast-AdenoCA(2),Eso-AdenoCA(2),Head-SCC(2),Skin-Melanoma(2),SoftTissue-Liposarc(2),Bone-Osteosarc(1),Kidney-RCC(1),Lymph-BNHL(1),Ovary-AdenoCA(1),Panc-AdenoCA(1),Uterus-AdenoCA(1)
DISRUPTION	'HIVEP3	25	Ovary-AdenoCA(4),Breast-AdenoCA(3),ColoRect-AdenoCA(2),Eso-AdenoCA(2),Liver-HCC(2),Panc-AdenoCA(2),Skin-Melanoma(2),Biliary-AdenoCA(1),Bladder-TCC(1),Bone-Osteosarc(1),CNS-GBM(1),Head-SCC(1),Lymph-BNHL(1),SoftTissue-Liposarc(1),Uterus-AdenoCA(1)
DISRUPTION	'INADL	25	Prost-AdenoCA(6),Ovary-AdenoCA(4),Breast-AdenoCA(3),Liver-HCC(3),Bone-Osteosarc(2),Skin-Melanoma(2),Stomach-AdenoCA(2),Head-SCC(1),Panc-AdenoCA(1),Uterus-AdenoCA(1)
DISRUPTION	'KDM4C	25	Liver-HCC(4),Panc-AdenoCA(4),Breast-AdenoCA(3),Ovary-AdenoCA(3),Bone-Osteosarc(2),Biliary-AdenoCA(1),Bladder-TCC(1),CNS-GBM(1),Kidney-RCC(1),Lung-AdenoCA(1),Prost-AdenoCA(1),Skin-Melanoma(1),SoftTissue-Liposarc(1),Stomach-AdenoCA(1)
DISRUPTION	'LRRTM4	25	ColoRect-AdenoCA(4),Ovary-AdenoCA(3),Prost-AdenoCA(3),Breast-AdenoCA(2),Eso-AdenoCA(2),Liver-HCC(2),Lung-SCC(2),Panc-AdenoCA(2),Skin-Melanoma(2),Lymph-BNHL(1),SoftTissue-Liposarc(1),Stomach-AdenoCA(1)
DISRUPTION	'NRXN1	25	Breast-AdenoCA(6),Bone-Osteosarc(4),Liver-HCC(2),Lung-AdenoCA(2),Lung-SCC(2),Ovary-AdenoCA(2),Panc-AdenoCA(2),Stomach-AdenoCA(2),Eso-AdenoCA(1),Prost-AdenoCA(1),Skin-Melanoma(1)
DISRUPTION	'OXR1	25	Breast-AdenoCA(6),Liver-HCC(4),Panc-AdenoCA(3),Stomach-AdenoCA(3),Bladder-TCC(2),Skin-Melanoma(2),CNS-GBM(1),ColoRect-AdenoCA(1),Eso-AdenoCA(1),SoftTissue-Liposarc(1),Uterus-AdenoCA(1)
DISRUPTION	'PRIM2	25	Breast-AdenoCA(6),Panc-AdenoCA(4),Ovary-AdenoCA(3),Skin-Melanoma(3),Biliary-AdenoCA(2),Eso-AdenoCA(2),Bone-Osteosarc(1),Cervix-SCC(1),Liver-HCC(1),Lung-SCC(1),Lymph-BNHL(1)
DISRUPTION	'PRKCA	25	Breast-AdenoCA(8),Eso-AdenoCA(5),Ovary-AdenoCA(3),Liver-HCC(2),Skin-Melanoma(2),SoftTissue-Liposarc(2),Bone-Osteosarc(1),Prost-AdenoCA(1),Stomach-AdenoCA(1)
DISRUPTION	'PXDNL	25	Breast-AdenoCA(6),Panc-AdenoCA(4),Skin-Melanoma(4),Liver-HCC(3),Ovary-AdenoCA(2),Prost-AdenoCA(2),Eso-AdenoCA(1),Kidney-ChRCC(1),Lung-AdenoCA(1),Lymph-BNHL(1)
DISRUPTION	'RBPJ	25	Prost-AdenoCA(16),Liver-HCC(3),Ovary-AdenoCA(2),Bone-Osteosarc(1),Breast-AdenoCA(1),Skin-Melanoma(1),Uterus-AdenoCA(1)
DISRUPTION	'RP11-114H23.1	25	SoftTissue-Liposarc(8),Breast-AdenoCA(4),Prost-AdenoCA(4),Ovary-AdenoCA(3),Skin-Melanoma(2),ColoRect-AdenoCA(1),Eso-AdenoCA(1),Panc-AdenoCA(1),Stomach-AdenoCA(1)
DISRUPTION	'RP11-123O10.4	25	SoftTissue-Liposarc(6),Breast-AdenoCA(5),Bone-Osteosarc(3),CNS-GBM(2),Eso-AdenoCA(2),Panc-AdenoCA(2),Lung-AdenoCA(1),Ovary-AdenoCA(1),Prost-AdenoCA(1),Skin-Melanoma(1),Stomach-AdenoCA(1)
DISRUPTION	'RP11-127H5.1	25	Breast-AdenoCA(4),Skin-Melanoma(4),Ovary-AdenoCA(3),Bone-Osteosarc(2),Prost-AdenoCA(2),SoftTissue-Liposarc(2),Bladder-TCC(1),Kidney-ChRCC(1),Liver-HCC(1),Lung-AdenoCA(1),Panc-AdenoCA(1),SoftTissue-Leiomyo(1),Stomach-AdenoCA(1),Uterus-AdenoCA(1)
DISRUPTION	'RP11-370A5.1	25	Panc-AdenoCA(9),Eso-AdenoCA(3),Breast-AdenoCA(2),Liver-HCC(2),Ovary-AdenoCA(2),Bone-Epith(1),Bone-Osteosarc(1),Head-SCC(1),Lung-SCC(1),Lymph-BNHL(1),SoftTissue-Liposarc(1),Stomach-AdenoCA(1)
DISRUPTION	'RP11-739N10.1	25	Panc-AdenoCA(6),Prost-AdenoCA(5),Breast-AdenoCA(3),Eso-AdenoCA(3),Ovary-AdenoCA(3),Biliary-AdenoCA(1),CNS-Medullo(1),Liver-HCC(1),Skin-Melanoma(1),Stomach-AdenoCA(1)
DISRUPTION	'RP5-1043L13.1	25	Breast-AdenoCA(7),Ovary-AdenoCA(5),Bone-Osteosarc(2),Panc-AdenoCA(2),Skin-Melanoma(2),Biliary-AdenoCA(1),CNS-Medullo(1),Eso-AdenoCA(1),Lung-AdenoCA(1),Lung-SCC(1),SoftTissue-Liposarc(1),Stomach-AdenoCA(1)
DISRUPTION	'SUGCT	25	Prost-AdenoCA(4),Liver-HCC(3),Breast-AdenoCA(2),Ovary-AdenoCA(2),Skin-Melanoma(2),Stomach-AdenoCA(2),Uterus-AdenoCA(2),Bladder-TCC(1),Bone-Osteosarc(1),Eso-AdenoCA(1),Head-SCC(1),Lung-AdenoCA(1),Lung-SCC(1),Panc-AdenoCA(1),SoftTissue-Liposarc(1)
DISRUPTION	'TMEM241	25	Eso-AdenoCA(8),Panc-AdenoCA(6),Liver-HCC(2),Bladder-TCC(1),Bone-Epith(1),Bone-Osteosarc(1),Breast-AdenoCA(1),ColoRect-AdenoCA(1),Head-SCC(1),Ovary-AdenoCA(1),Skin-Melanoma(1),SoftTissue-Liposarc(1)
DISRUPTION	'WHSC1L1	25	Prost-AdenoCA(8),Lung-SCC(3),Ovary-AdenoCA(3),Eso-AdenoCA(2),Panc-AdenoCA(2),Bladder-TCC(1),Breast-AdenoCA(1),Liver-HCC(1),Lung-AdenoCA(1),SoftTissue-Liposarc(1),Stomach-AdenoCA(1),Uterus-AdenoCA(1)
DISRUPTION	'ZNF804B	25	Panc-AdenoCA(4),Eso-AdenoCA(3),Breast-AdenoCA(2),Liver-HCC(2),Ovary-AdenoCA(2),Skin-Melanoma(2),Stomach-AdenoCA(2),Biliary-AdenoCA(1),Bladder-TCC(1),Cervix-SCC(1),ColoRect-AdenoCA(1),Kidney-RCC(1),Lung-AdenoCA(1),Prost-AdenoCA(1),SoftTissue-Leiomyo(1)
EXON_SKIP	'AGBL4	25	Eso-AdenoCA(6),ColoRect-AdenoCA(4),Panc-AdenoCA(4),Kidney-RCC(3),Ovary-AdenoCA(3),Breast-AdenoCA(1),Liver-HCC(1),Lung-SCC(1),Prost-AdenoCA(1),Stomach-AdenoCA(1)
EXON_SKIP	'ZBTB20	25	Liver-HCC(5),Head-SCC(4),Breast-AdenoCA(2),ColoRect-AdenoCA(2),Eso-AdenoCA(2),Lymph-BNHL(2),Ovary-AdenoCA(2),Panc-AdenoCA(2),Biliary-AdenoCA(1),Bladder-TCC(1),Prost-AdenoCA(1),Stomach-AdenoCA(1)
FUSION_5	'CACNA2D3	25	Breast-AdenoCA(7),Stomach-AdenoCA(6),Eso-AdenoCA(2),Head-SCC(2),Ovary-AdenoCA(2),Skin-Melanoma(2),Kidney-RCC(1),Liver-HCC(1),Prost-AdenoCA(1),Uterus-AdenoCA(1)
FUSION_5	'DLGAP1	25	Panc-AdenoCA(7),SoftTissue-Liposarc(5),Bone-Osteosarc(3),Breast-AdenoCA(2),Lung-SCC(2),Cervix-SCC(1),Kidney-ChRCC(1),Liver-HCC(1),Ovary-AdenoCA(1),Skin-Melanoma(1),Uterus-AdenoCA(1)
FUSION_5	'IMMP2L	25	Eso-AdenoCA(6),Breast-AdenoCA(3),Stomach-AdenoCA(3),Uterus-AdenoCA(3),Ovary-AdenoCA(2),Prost-AdenoCA(2),CNS-Medullo(1),ColoRect-AdenoCA(1),Lung-SCC(1),Lymph-BNHL(1),Panc-AdenoCA(1),Skin-Melanoma(1)
FUSION_5	'JUP	25	Eso-AdenoCA(8),Breast-AdenoCA(6),Stomach-AdenoCA(4),Ovary-AdenoCA(2),Biliary-AdenoCA(1),Liver-HCC(1),Lung-SCC(1),Prost-AdenoCA(1),Uterus-AdenoCA(1)
FUSION_5	'NAV3	25	SoftTissue-Liposarc(17),Breast-AdenoCA(2),Skin-Melanoma(2),Bone-Osteosarc(1),Liver-HCC(1),Lung-SCC(1),Ovary-AdenoCA(1)
FUSION_5	'NF1	25	Skin-Melanoma(4),Breast-AdenoCA(3),Ovary-AdenoCA(3),Bone-Osteosarc(2),CNS-GBM(2),Eso-AdenoCA(2),Prost-AdenoCA(2),SoftTissue-Liposarc(2),ColoRect-AdenoCA(1),Head-SCC(1),Panc-AdenoCA(1),Stomach-AdenoCA(1),Uterus-AdenoCA(1)
FUSION_5	'ROBO2	25	Kidney-RCC(6),SoftTissue-Liposarc(6),Breast-AdenoCA(4),Bone-Osteosarc(2),Skin-Melanoma(2),Bone-Benign(1),Eso-AdenoCA(1),Ovary-AdenoCA(1),Panc-AdenoCA(1),Stomach-AdenoCA(1)
FUSION_5	'SLC35E3	25	SoftTissue-Liposarc(20),Breast-AdenoCA(3),CNS-GBM(1),Eso-AdenoCA(1)
FUSION_5	'XKR4	25	Prost-AdenoCA(18),Breast-AdenoCA(2),Ovary-AdenoCA(2),Lung-SCC(1),SoftTissue-Liposarc(1),Stomach-AdenoCA(1)
FUSION_3	'JUP	25	Eso-AdenoCA(9),Breast-AdenoCA(5),Biliary-AdenoCA(2),Prost-AdenoCA(2),CNS-Medullo(1),Cervix-SCC(1),Ovary-AdenoCA(1),Panc-AdenoCA(1),Skin-Melanoma(1),SoftTissue-Liposarc(1),Stomach-AdenoCA(1)
FUSION_3	'MAGI1	25	Prost-AdenoCA(18),Breast-AdenoCA(2),Ovary-AdenoCA(2),Bladder-TCC(1),ColoRect-AdenoCA(1),Skin-Melanoma(1)
FUSION_3	'MYRFL	25	SoftTissue-Liposarc(19),Skin-Melanoma(3),ColoRect-AdenoCA(1),Eso-AdenoCA(1),Stomach-AdenoCA(1)
FUSION_3	'RP11-123O10.4	25	SoftTissue-Liposarc(8),Prost-AdenoCA(4),Bone-Osteosarc(3),Skin-Melanoma(3),CNS-GBM(2),Eso-AdenoCA(2),Breast-AdenoCA(1),Lymph-BNHL(1),Stomach-AdenoCA(1)
FUSION_3	'RP11-13A1.3	25	SoftTissue-Liposarc(18),Bladder-TCC(1),Breast-AdenoCA(1),CNS-GBM(1),ColoRect-AdenoCA(1),Lung-SCC(1),Skin-Melanoma(1),SoftTissue-Leiomyo(1)
DISRUPTION	'ADCY8	24	Breast-AdenoCA(5),Bone-Osteosarc(4),Ovary-AdenoCA(3),Panc-AdenoCA(3),Prost-AdenoCA(2),Biliary-AdenoCA(1),Liver-HCC(1),Lung-AdenoCA(1),Panc-Endocrine(1),Skin-Melanoma(1),SoftTissue-Liposarc(1),Uterus-AdenoCA(1)
DISRUPTION	'ARHGAP15	24	Prost-AdenoCA(6),Panc-AdenoCA(4),Breast-AdenoCA(3),Eso-AdenoCA(2),Lung-SCC(2),Ovary-AdenoCA(2),Head-SCC(1),Kidney-RCC(1),Liver-HCC(1),Lymph-BNHL(1),SoftTissue-Liposarc(1)
DISRUPTION	'ASTN2	24	Prost-AdenoCA(7),Breast-AdenoCA(5),Panc-AdenoCA(4),Ovary-AdenoCA(2),Bone-Osteosarc(1),Eso-AdenoCA(1),Liver-HCC(1),Lung-AdenoCA(1),Panc-Endocrine(1),Skin-Melanoma(1)
DISRUPTION	'ATXN1	24	Breast-AdenoCA(6),Ovary-AdenoCA(3),Panc-AdenoCA(3),Liver-HCC(2),Skin-Melanoma(2),Bone-Osteosarc(1),ColoRect-AdenoCA(1),Eso-AdenoCA(1),Lung-AdenoCA(1),Lung-SCC(1),Prost-AdenoCA(1),SoftTissue-Liposarc(1),Uterus-AdenoCA(1)
DISRUPTION	'BRINP3	24	Prost-AdenoCA(5),Ovary-AdenoCA(4),Breast-AdenoCA(2),Eso-AdenoCA(2),Lung-SCC(2),SoftTissue-Liposarc(2),Bladder-TCC(1),Liver-HCC(1),Lung-AdenoCA(1),Panc-AdenoCA(1),Panc-Endocrine(1),Skin-Melanoma(1),Stomach-AdenoCA(1)
DISRUPTION	'C8orf34	24	Liver-HCC(6),Bone-Osteosarc(2),Breast-AdenoCA(2),Ovary-AdenoCA(2),Panc-AdenoCA(2),Prost-AdenoCA(2),CNS-Medullo(1),Eso-AdenoCA(1),Head-SCC(1),Kidney-RCC(1),Lung-AdenoCA(1),Skin-Melanoma(1),Stomach-AdenoCA(1),Uterus-AdenoCA(1)
DISRUPTION	'CAMTA1	24	Breast-AdenoCA(5),Ovary-AdenoCA(4),Panc-AdenoCA(3),Liver-HCC(2),Biliary-AdenoCA(1),Bone-Osteosarc(1),CNS-GBM(1),Eso-AdenoCA(1),Lymph-BNHL(1),Prost-AdenoCA(1),Skin-Melanoma(1),SoftTissue-Leiomyo(1),Stomach-AdenoCA(1),Uterus-AdenoCA(1)
DISRUPTION	'CHD6	24	Prost-AdenoCA(10),ColoRect-AdenoCA(2),Liver-HCC(2),Bladder-TCC(1),Bone-Osteosarc(1),Breast-AdenoCA(1),Lung-AdenoCA(1),Lung-SCC(1),Ovary-AdenoCA(1),Panc-AdenoCA(1),Skin-Melanoma(1),Stomach-AdenoCA(1),Uterus-AdenoCA(1)
DISRUPTION	'CHRM3	24	Breast-AdenoCA(7),Eso-AdenoCA(4),SoftTissue-Liposarc(3),Liver-HCC(2),Stomach-AdenoCA(2),Bone-Osteosarc(1),CNS-GBM(1),Ovary-AdenoCA(1),Panc-AdenoCA(1),Prost-AdenoCA(1),Skin-Melanoma(1)
DISRUPTION	'CHST9	24	Panc-AdenoCA(9),Lung-SCC(2),Ovary-AdenoCA(2),Skin-Melanoma(2),Breast-AdenoCA(1),CNS-GBM(1),Eso-AdenoCA(1),Head-SCC(1),Lung-AdenoCA(1),Lymph-BNHL(1),Myeloid-MPN(1),Prost-AdenoCA(1),SoftTissue-Leiomyo(1)
DISRUPTION	'CLDN11	24	Eso-AdenoCA(4),Ovary-AdenoCA(4),Panc-AdenoCA(3),Breast-AdenoCA(2),Liver-HCC(2),Lung-AdenoCA(2),SoftTissue-Liposarc(2),Cervix-SCC(1),Lung-SCC(1),Prost-AdenoCA(1),Skin-Melanoma(1),Stomach-AdenoCA(1)
DISRUPTION	'CPNE4	24	Prost-AdenoCA(14),Skin-Melanoma(3),Breast-AdenoCA(1),Eso-AdenoCA(1),Kidney-RCC(1),Liver-HCC(1),Lymph-BNHL(1),Panc-AdenoCA(1),Stomach-AdenoCA(1)
DISRUPTION	'DNM3	24	SoftTissue-Liposarc(7),Breast-AdenoCA(5),Biliary-AdenoCA(3),Skin-Melanoma(2),Eso-AdenoCA(1),Head-SCC(1),Ovary-AdenoCA(1),Panc-Endocrine(1),Prost-AdenoCA(1),Stomach-AdenoCA(1),Uterus-AdenoCA(1)
DISRUPTION	'EXT1	24	Ovary-AdenoCA(4),Breast-AdenoCA(3),Liver-HCC(3),Lung-SCC(3),Bone-Osteosarc(2),Prost-AdenoCA(2),Eso-AdenoCA(1),Lung-AdenoCA(1),Panc-AdenoCA(1),Panc-Endocrine(1),Skin-Melanoma(1),SoftTissue-Liposarc(1),Stomach-AdenoCA(1)
DISRUPTION	'FCHSD2	24	Skin-Melanoma(6),Breast-AdenoCA(5),Liver-HCC(4),Eso-AdenoCA(2),Uterus-AdenoCA(2),Breast-LobularCA(1),Head-SCC(1),Panc-AdenoCA(1),Prost-AdenoCA(1),SoftTissue-Liposarc(1)
DISRUPTION	'FGF12	24	Breast-AdenoCA(7),Lung-SCC(3),Ovary-AdenoCA(3),SoftTissue-Liposarc(3),Bladder-TCC(2),Liver-HCC(2),Panc-AdenoCA(2),Skin-Melanoma(2)
DISRUPTION	'GPD2	24	Prost-AdenoCA(12),Ovary-AdenoCA(4),Liver-HCC(3),Breast-AdenoCA(2),Bone-Osteosarc(1),Lung-SCC(1),Panc-AdenoCA(1)
DISRUPTION	'ITPR2	24	Ovary-AdenoCA(6),Breast-AdenoCA(4),Panc-AdenoCA(4),Liver-HCC(2),SoftTissue-Liposarc(2),Bone-Osteosarc(1),CNS-Oligo(1),Eso-AdenoCA(1),Lung-AdenoCA(1),Lymph-BNHL(1),Skin-Melanoma(1)
DISRUPTION	'KCNIP4	24	Eso-AdenoCA(6),Ovary-AdenoCA(4),Head-SCC(2),Liver-HCC(2),SoftTissue-Liposarc(2),Bone-Osteosarc(1),Breast-AdenoCA(1),Lung-SCC(1),Panc-AdenoCA(1),Panc-Endocrine(1),Prost-AdenoCA(1),Skin-Melanoma(1),Stomach-AdenoCA(1)
DISRUPTION	'KCNQ3	24	Prost-AdenoCA(12),Breast-AdenoCA(3),Panc-AdenoCA(3),Liver-HCC(2),Uterus-AdenoCA(2),Eso-AdenoCA(1),Lymph-BNHL(1)
DISRUPTION	'KCNQ5	24	Ovary-AdenoCA(5),Breast-AdenoCA(4),Prost-AdenoCA(3),Bone-Osteosarc(2),Liver-HCC(2),Skin-Melanoma(2),SoftTissue-Liposarc(2),Biliary-AdenoCA(1),ColoRect-AdenoCA(1),Panc-AdenoCA(1),Uterus-AdenoCA(1)
DISRUPTION	'LINC00907	24	Prost-AdenoCA(4),Lung-SCC(3),Ovary-AdenoCA(3),Panc-AdenoCA(3),Skin-Melanoma(3),SoftTissue-Liposarc(2),Breast-AdenoCA(1),Liver-HCC(1),Lung-AdenoCA(1),Lymph-BNHL(1),SoftTissue-Leiomyo(1),Stomach-AdenoCA(1)
DISRUPTION	'MAN1A2	24	Prost-AdenoCA(10),Liver-HCC(3),Stomach-AdenoCA(3),Breast-AdenoCA(1),Breast-LobularCA(1),Eso-AdenoCA(1),Kidney-RCC(1),Panc-AdenoCA(1),Panc-Endocrine(1),Skin-Melanoma(1),SoftTissue-Liposarc(1)
DISRUPTION	'MIB1	24	Panc-AdenoCA(9),Eso-AdenoCA(4),Stomach-AdenoCA(4),Bone-Osteosarc(1),Liver-HCC(1),Lung-SCC(1),Lymph-BNHL(1),Ovary-AdenoCA(1),Skin-Melanoma(1),SoftTissue-Liposarc(1)
DISRUPTION	'MTUS2	24	Prost-AdenoCA(10),Breast-AdenoCA(6),Eso-AdenoCA(2),Liver-HCC(2),Biliary-AdenoCA(1),Lymph-BNHL(1),Panc-AdenoCA(1),Stomach-AdenoCA(1)
DISRUPTION	'MYO16	24	Prost-AdenoCA(5),Eso-AdenoCA(3),Liver-HCC(3),Stomach-AdenoCA(3),CNS-GBM(2),Ovary-AdenoCA(2),Panc-AdenoCA(2),Skin-Melanoma(2),Breast-AdenoCA(1),Lung-SCC(1)
DISRUPTION	'NEAT1	24	Prost-AdenoCA(6),Liver-HCC(5),Uterus-AdenoCA(4),Stomach-AdenoCA(3),Breast-AdenoCA(2),Eso-AdenoCA(2),Lung-SCC(1),Panc-AdenoCA(1)
DISRUPTION	'NELL1	24	Breast-AdenoCA(4),Prost-AdenoCA(4),Ovary-AdenoCA(3),Panc-AdenoCA(3),SoftTissue-Liposarc(3),Skin-Melanoma(2),Bone-Osteosarc(1),Eso-AdenoCA(1),Liver-HCC(1),Panc-Endocrine(1),Uterus-AdenoCA(1)
DISRUPTION	'PPFIA1	24	Breast-AdenoCA(6),Breast-LobularCA(3),Skin-Melanoma(3),Eso-AdenoCA(2),Head-SCC(2),Lung-SCC(2),Stomach-AdenoCA(2),Bladder-TCC(1),ColoRect-AdenoCA(1),Liver-HCC(1),Panc-AdenoCA(1)
DISRUPTION	'PPFIA2	24	SoftTissue-Liposarc(9),Bone-Osteosarc(3),Breast-AdenoCA(2),Lymph-BNHL(2),Skin-Melanoma(2),Stomach-AdenoCA(2),Biliary-AdenoCA(1),Liver-HCC(1),Lung-SCC(1),Panc-AdenoCA(1)
DISRUPTION	'PSD3	24	Prost-AdenoCA(5),Liver-HCC(4),Eso-AdenoCA(3),Skin-Melanoma(3),Stomach-AdenoCA(3),Breast-LobularCA(1),CNS-Medullo(1),Lung-AdenoCA(1),Panc-AdenoCA(1),SoftTissue-Liposarc(1),Uterus-AdenoCA(1)
DISRUPTION	'RIMS1	24	Breast-AdenoCA(7),Lymph-BNHL(3),Ovary-AdenoCA(3),Skin-Melanoma(3),Bone-Osteosarc(2),Liver-HCC(2),Panc-AdenoCA(1),Panc-Endocrine(1),Stomach-AdenoCA(1),Uterus-AdenoCA(1)
DISRUPTION	'RORA	24	Breast-AdenoCA(5),Ovary-AdenoCA(4),Panc-AdenoCA(3),Prost-AdenoCA(3),Skin-Melanoma(3),Liver-HCC(2),Breast-LobularCA(1),Eso-AdenoCA(1),Kidney-ChRCC(1),Lymph-BNHL(1)
DISRUPTION	'RP11-317N12.1	24	Breast-AdenoCA(4),Liver-HCC(4),Eso-AdenoCA(2),Ovary-AdenoCA(2),Panc-AdenoCA(2),Stomach-AdenoCA(2),Bone-Osteosarc(1),CNS-Medullo(1),ColoRect-AdenoCA(1),Head-SCC(1),Lung-AdenoCA(1),Lung-SCC(1),Lymph-BNHL(1),Prost-AdenoCA(1)
DISRUPTION	'RP11-420N3.2	24	Liver-HCC(4),Panc-AdenoCA(4),Prost-AdenoCA(4),Bone-Osteosarc(3),Bladder-TCC(2),Breast-AdenoCA(2),Lymph-BNHL(2),Ovary-AdenoCA(2),Eso-AdenoCA(1)
DISRUPTION	'RP11-444D3.1	24	Ovary-AdenoCA(5),Panc-AdenoCA(4),Breast-AdenoCA(3),Liver-HCC(3),Eso-AdenoCA(2),Bone-Osteosarc(1),Head-SCC(1),Lung-AdenoCA(1),Lymph-BNHL(1),Skin-Melanoma(1),Stomach-AdenoCA(1),Uterus-AdenoCA(1)
DISRUPTION	'RP11-613M10.9	24	Breast-AdenoCA(5),Eso-AdenoCA(4),Skin-Melanoma(3),SoftTissue-Liposarc(3),Panc-AdenoCA(2),Bone-Osteosarc(1),CNS-GBM(1),Liver-HCC(1),Ovary-AdenoCA(1),Prost-AdenoCA(1),Stomach-AdenoCA(1),Uterus-AdenoCA(1)
DISRUPTION	'RP11-89M16.1	24	Ovary-AdenoCA(5),Uterus-AdenoCA(4),Breast-AdenoCA(3),Liver-HCC(3),Panc-AdenoCA(2),Stomach-AdenoCA(2),Bone-Osteosarc(1),CNS-Medullo(1),Cervix-SCC(1),Lung-AdenoCA(1),Lung-SCC(1)
DISRUPTION	'RP11-962G15.1	24	Breast-AdenoCA(6),Panc-AdenoCA(5),Liver-HCC(3),Lung-AdenoCA(2),Lung-SCC(2),Prost-AdenoCA(2),Eso-AdenoCA(1),Skin-Melanoma(1),Stomach-AdenoCA(1),Uterus-AdenoCA(1)
DISRUPTION	'SEMA5A	24	Liver-HCC(5),Breast-AdenoCA(4),Skin-Melanoma(4),Bone-Osteosarc(2),Panc-AdenoCA(2),SoftTissue-Liposarc(2),Lung-AdenoCA(1),Lung-SCC(1),Ovary-AdenoCA(1),Prost-AdenoCA(1),Stomach-AdenoCA(1)
DISRUPTION	'SIPA1L3	24	Ovary-AdenoCA(6),Uterus-AdenoCA(5),Breast-AdenoCA(2),Liver-HCC(2),Biliary-AdenoCA(1),Bone-Osteosarc(1),Eso-AdenoCA(1),Lung-AdenoCA(1),Lung-SCC(1),Lymph-BNHL(1),Panc-AdenoCA(1),Panc-Endocrine(1),SoftTissue-Liposarc(1)
DISRUPTION	'SLC24A2	24	Panc-AdenoCA(7),SoftTissue-Liposarc(4),Breast-AdenoCA(3),CNS-GBM(3),Ovary-AdenoCA(2),Liver-HCC(1),Lymph-BNHL(1),Panc-Endocrine(1),Prost-AdenoCA(1),Skin-Melanoma(1)
DISRUPTION	'SPIDR	24	Liver-HCC(6),Panc-AdenoCA(4),Breast-AdenoCA(2),Prost-AdenoCA(2),Skin-Melanoma(2),Stomach-AdenoCA(2),Bone-Osteosarc(1),Head-SCC(1),Lymph-BNHL(1),Ovary-AdenoCA(1),SoftTissue-Liposarc(1),Uterus-AdenoCA(1)
DISRUPTION	'TTC6	24	Breast-AdenoCA(5),Prost-AdenoCA(5),Panc-AdenoCA(3),Eso-AdenoCA(2),Stomach-AdenoCA(2),Biliary-AdenoCA(1),Bone-Osteosarc(1),Liver-HCC(1),Lung-AdenoCA(1),Lung-SCC(1),Ovary-AdenoCA(1),Skin-Melanoma(1)
EXON_SKIP	'TTC6	24	Prost-AdenoCA(10),Liver-HCC(6),Breast-AdenoCA(4),Bone-Osteosarc(1),Eso-AdenoCA(1),Lung-SCC(1),Ovary-AdenoCA(1)
ITD	'PDE4D	24	Eso-AdenoCA(6),Prost-AdenoCA(4),Breast-AdenoCA(2),Lung-SCC(2),Ovary-AdenoCA(2),Panc-AdenoCA(2),CNS-Medullo(1),ColoRect-AdenoCA(1),Kidney-ChRCC(1),Lung-AdenoCA(1),Skin-Melanoma(1),Stomach-AdenoCA(1)
DYSFUNCTIONAL_FUSION	'ERG:TMPRSS2	24	Prost-AdenoCA(24)
FUSION_5	'DAB1	24	Bone-Osteosarc(6),Prost-AdenoCA(4),Liver-HCC(3),Eso-AdenoCA(2),Ovary-AdenoCA(2),SoftTissue-Liposarc(2),Breast-AdenoCA(1),Cervix-SCC(1),Panc-AdenoCA(1),Skin-Melanoma(1),Stomach-AdenoCA(1)
FUSION_5	'FIP1L1	24	Skin-Melanoma(7),CNS-GBM(3),Liver-HCC(3),Bone-Benign(2),Eso-AdenoCA(2),Ovary-AdenoCA(2),Panc-AdenoCA(2),Prost-AdenoCA(2),Stomach-AdenoCA(1)
FUSION_5	'LMCD1-AS1	24	Ovary-AdenoCA(7),SoftTissue-Liposarc(6),Prost-AdenoCA(4),Breast-AdenoCA(2),Liver-HCC(2),Uterus-AdenoCA(2),Stomach-AdenoCA(1)
FUSION_5	'PDE4D	24	Lung-AdenoCA(5),ColoRect-AdenoCA(3),Prost-AdenoCA(3),Breast-AdenoCA(2),Liver-HCC(2),SoftTissue-Liposarc(2),Biliary-AdenoCA(1),Eso-AdenoCA(1),Kidney-ChRCC(1),Lung-SCC(1),Skin-Melanoma(1),Stomach-AdenoCA(1),Uterus-AdenoCA(1)
FUSION_5	'PPFIA2	24	SoftTissue-Liposarc(16),Stomach-AdenoCA(4),Liver-HCC(2),Breast-AdenoCA(1),Skin-Melanoma(1)
FUSION_5	'RP11-230G5.2	24	SoftTissue-Liposarc(10),Eso-AdenoCA(3),Bone-Osteosarc(2),Breast-AdenoCA(2),CNS-GBM(2),Skin-Melanoma(2),Bladder-TCC(1),Liver-HCC(1),Ovary-AdenoCA(1)
FUSION_5	'SKAP1	24	Breast-AdenoCA(8),Uterus-AdenoCA(7),Ovary-AdenoCA(3),Lung-SCC(2),Bladder-TCC(1),Cervix-SCC(1),Prost-AdenoCA(1),Skin-Melanoma(1)
FUSION_5	'SLC35F1	24	Prost-AdenoCA(10),SoftTissue-Liposarc(5),Breast-AdenoCA(4),Bone-Osteosarc(2),ColoRect-AdenoCA(1),Liver-HCC(1),Ovary-AdenoCA(1)
FUSION_5	'WWOX	24	Breast-AdenoCA(4),Eso-AdenoCA(4),Panc-AdenoCA(3),Ovary-AdenoCA(2),Prost-AdenoCA(2),Skin-Melanoma(2),Bladder-TCC(1),Breast-DCIS(1),CNS-GBM(1),ColoRect-AdenoCA(1),Liver-HCC(1),Lung-AdenoCA(1),Lymph-BNHL(1)
FUSION_3	'CDH12	24	SoftTissue-Liposarc(9),Skin-Melanoma(6),Bone-Osteosarc(2),Breast-AdenoCA(2),Ovary-AdenoCA(2),Panc-AdenoCA(2),Liver-HCC(1)
FUSION_3	'CDH4	24	Breast-AdenoCA(9),Prost-AdenoCA(4),Bone-Osteosarc(2),Ovary-AdenoCA(2),ColoRect-AdenoCA(1),Eso-AdenoCA(1),Liver-HCC(1),Panc-AdenoCA(1),Panc-Endocrine(1),Skin-Melanoma(1),Uterus-AdenoCA(1)
FUSION_3	'CNTN5	24	Skin-Melanoma(5),Breast-AdenoCA(4),Head-SCC(4),Ovary-AdenoCA(4),Eso-AdenoCA(2),SoftTissue-Liposarc(2),Biliary-AdenoCA(1),Stomach-AdenoCA(1),Uterus-AdenoCA(1)
FUSION_3	'CSMD3	24	Ovary-AdenoCA(5),Breast-AdenoCA(3),Panc-AdenoCA(3),SoftTissue-Liposarc(3),Breast-LobularCA(2),Lung-AdenoCA(2),Cervix-SCC(1),Head-SCC(1),Kidney-RCC(1),Liver-HCC(1),Stomach-AdenoCA(1),Uterus-AdenoCA(1)
FUSION_3	'LRP1B	24	Prost-AdenoCA(9),Ovary-AdenoCA(4),Bladder-TCC(2),Bone-Osteosarc(2),Lung-AdenoCA(2),Breast-AdenoCA(1),Liver-HCC(1),Lung-SCC(1),Panc-AdenoCA(1),Skin-Melanoma(1)
FUSION_3	'NCKAP5	24	Prost-AdenoCA(12),Breast-AdenoCA(3),Panc-AdenoCA(2),Skin-Melanoma(2),Head-SCC(1),Liver-HCC(1),Lung-SCC(1),SoftTissue-Liposarc(1),Stomach-AdenoCA(1)
FUSION_3	'PDE10A	24	Prost-AdenoCA(8),CNS-GBM(4),Breast-AdenoCA(3),Panc-AdenoCA(3),Bone-Osteosarc(2),Cervix-SCC(1),Skin-Melanoma(1),Stomach-AdenoCA(1),Uterus-AdenoCA(1)
DISRUPTION	'ADAM32	23	Breast-AdenoCA(9),Liver-HCC(3),Panc-AdenoCA(3),Prost-AdenoCA(3),Bladder-TCC(1),ColoRect-AdenoCA(1),Eso-AdenoCA(1),Lung-SCC(1),Ovary-AdenoCA(1)
DISRUPTION	'ADCY2	23	Skin-Melanoma(4),SoftTissue-Liposarc(4),Bone-Osteosarc(3),Kidney-ChRCC(2),Liver-HCC(2),Ovary-AdenoCA(2),Prost-AdenoCA(2),Breast-AdenoCA(1),Lung-AdenoCA(1),Stomach-AdenoCA(1),Uterus-AdenoCA(1)
DISRUPTION	'AVL9	23	Prost-AdenoCA(3),Stomach-AdenoCA(3),CNS-GBM(2),Lung-SCC(2),Ovary-AdenoCA(2),Biliary-AdenoCA(1),Bladder-TCC(1),Bone-Osteosarc(1),Breast-AdenoCA(1),Eso-AdenoCA(1),Head-SCC(1),Liver-HCC(1),Lung-AdenoCA(1),Skin-Melanoma(1),SoftTissue-Liposarc(1),Uterus-AdenoCA(1)
DISRUPTION	'CCDC178	23	Ovary-AdenoCA(4),Panc-AdenoCA(4),Eso-AdenoCA(3),Prost-AdenoCA(2),Stomach-AdenoCA(2),Biliary-AdenoCA(1),Bone-Osteosarc(1),Breast-AdenoCA(1),Kidney-RCC(1),Liver-HCC(1),Lung-AdenoCA(1),Lung-SCC(1),SoftTissue-Liposarc(1)
DISRUPTION	'CTC-525D6.1	23	Ovary-AdenoCA(7),Eso-AdenoCA(4),Panc-AdenoCA(3),Uterus-AdenoCA(3),Skin-Melanoma(2),Bone-Osteosarc(1),Breast-AdenoCA(1),Breast-LobularCA(1),Stomach-AdenoCA(1)
DISRUPTION	'CTC-535M15.2	23	Bone-Osteosarc(4),Prost-AdenoCA(4),Breast-AdenoCA(2),CNS-GBM(2),Liver-HCC(2),SoftTissue-Liposarc(2),Bone-Epith(1),CNS-Medullo(1),Eso-AdenoCA(1),Kidney-RCC(1),Panc-AdenoCA(1),Skin-Melanoma(1),Stomach-AdenoCA(1)
DISRUPTION	'FRS2	23	SoftTissue-Liposarc(12),Eso-AdenoCA(3),Stomach-AdenoCA(3),Bone-Osteosarc(2),Skin-Melanoma(2),Ovary-AdenoCA(1)
DISRUPTION	'GREB1L	23	Panc-AdenoCA(6),Eso-AdenoCA(4),Breast-AdenoCA(2),Biliary-AdenoCA(1),Bone-Epith(1),Bone-Osteosarc(1),ColoRect-AdenoCA(1),Head-SCC(1),Kidney-RCC(1),Liver-HCC(1),Lung-SCC(1),Ovary-AdenoCA(1),Skin-Melanoma(1),Stomach-AdenoCA(1)
DISRUPTION	'GRID1	23	Prost-AdenoCA(6),Breast-AdenoCA(4),Stomach-AdenoCA(3),Biliary-AdenoCA(2),Uterus-AdenoCA(2),Bladder-TCC(1),Liver-HCC(1),Lung-SCC(1),Lymph-BNHL(1),Ovary-AdenoCA(1),Panc-AdenoCA(1)
DISRUPTION	'ITGAV	23	Head-SCC(4),Liver-HCC(3),Uterus-AdenoCA(3),Bone-Osteosarc(2),Breast-AdenoCA(2),Eso-AdenoCA(2),Stomach-AdenoCA(2),ColoRect-AdenoCA(1),Lung-SCC(1),Ovary-AdenoCA(1),Panc-AdenoCA(1),Prost-AdenoCA(1)
DISRUPTION	'KAZN	23	Breast-AdenoCA(3),Eso-AdenoCA(3),Uterus-AdenoCA(3),Ovary-AdenoCA(2),Panc-AdenoCA(2),Prost-AdenoCA(2),Bladder-TCC(1),Breast-LobularCA(1),CNS-GBM(1),Cervix-SCC(1),ColoRect-AdenoCA(1),Head-SCC(1),Liver-HCC(1),Lung-AdenoCA(1)
DISRUPTION	'KIRREL3	23	Breast-AdenoCA(6),Prost-AdenoCA(6),Ovary-AdenoCA(4),Panc-AdenoCA(2),ColoRect-AdenoCA(1),Head-SCC(1),Liver-HCC(1),Skin-Melanoma(1),SoftTissue-Liposarc(1)
DISRUPTION	'LINC00669	23	Eso-AdenoCA(5),Lung-SCC(3),Ovary-AdenoCA(3),Panc-AdenoCA(3),Breast-AdenoCA(2),Skin-Melanoma(2),SoftTissue-Liposarc(2),Biliary-AdenoCA(1),Lymph-BNHL(1),Panc-Endocrine(1)
DISRUPTION	'MACF1	23	Liver-HCC(4),Ovary-AdenoCA(4),Uterus-AdenoCA(3),Breast-AdenoCA(2),SoftTissue-Liposarc(2),Stomach-AdenoCA(2),Biliary-AdenoCA(1),Bone-Osteosarc(1),Eso-AdenoCA(1),Lung-SCC(1),Panc-AdenoCA(1),SoftTissue-Leiomyo(1)
DISRUPTION	'NEGR1	23	Breast-AdenoCA(7),Bone-Osteosarc(3),Panc-AdenoCA(3),Ovary-AdenoCA(2),Prost-AdenoCA(2),Stomach-AdenoCA(2),Eso-AdenoCA(1),Liver-HCC(1),Lung-SCC(1),Skin-Melanoma(1)
DISRUPTION	'OPCML	23	Ovary-AdenoCA(4),Prost-AdenoCA(4),Bone-Osteosarc(2),Breast-AdenoCA(2),Head-SCC(2),SoftTissue-Liposarc(2),Cervix-SCC(1),ColoRect-AdenoCA(1),Kidney-RCC(1),Liver-HCC(1),Lung-AdenoCA(1),Panc-AdenoCA(1),Uterus-AdenoCA(1)
DISRUPTION	'PDZRN4	23	Panc-AdenoCA(4),Skin-Melanoma(4),Breast-AdenoCA(2),Ovary-AdenoCA(2),Prost-AdenoCA(2),Stomach-AdenoCA(2),CNS-GBM(1),Kidney-ChRCC(1),Liver-HCC(1),Lung-AdenoCA(1),Lung-SCC(1),SoftTissue-Liposarc(1),Uterus-AdenoCA(1)
DISRUPTION	'PIEZO2	23	Panc-AdenoCA(8),Ovary-AdenoCA(3),Breast-AdenoCA(2),Eso-AdenoCA(2),SoftTissue-Leiomyo(2),Stomach-AdenoCA(2),Bone-Osteosarc(1),Head-SCC(1),Liver-HCC(1),Skin-Melanoma(1)
DISRUPTION	'RP11-445O3.2	23	Bone-Osteosarc(3),Breast-AdenoCA(3),Panc-AdenoCA(3),Bladder-TCC(2),Liver-HCC(2),Ovary-AdenoCA(2),Skin-Melanoma(2),SoftTissue-Liposarc(2),Breast-LobularCA(1),CNS-Medullo(1),Eso-AdenoCA(1),Lung-AdenoCA(1)
DISRUPTION	'RP11-608O21.1	23	Ovary-AdenoCA(7),Uterus-AdenoCA(3),Breast-AdenoCA(2),SoftTissue-Liposarc(2),Stomach-AdenoCA(2),Bone-Osteosarc(1),Head-SCC(1),Liver-HCC(1),Lung-SCC(1),Panc-AdenoCA(1),Skin-Melanoma(1),SoftTissue-Leiomyo(1)
DISRUPTION	'RP11-649A16.1	23	Prost-AdenoCA(6),Liver-HCC(3),Lung-SCC(3),Breast-AdenoCA(2),Ovary-AdenoCA(2),Bone-Osteosarc(1),CNS-Medullo(1),Eso-AdenoCA(1),Kidney-RCC(1),SoftTissue-Leiomyo(1),SoftTissue-Liposarc(1),Stomach-AdenoCA(1)
DISRUPTION	'SLC14A2	23	Panc-AdenoCA(5),Breast-AdenoCA(4),Prost-AdenoCA(4),Liver-HCC(2),Uterus-AdenoCA(2),Bone-Osteosarc(1),Eso-AdenoCA(1),Lung-SCC(1),Lymph-BNHL(1),Ovary-AdenoCA(1),Stomach-AdenoCA(1)
DISRUPTION	'SLC9A9	23	Prost-AdenoCA(7),Breast-AdenoCA(5),Bladder-TCC(1),Bone-Osteosarc(1),CNS-GBM(1),CNS-Medullo(1),CNS-Oligo(1),Eso-AdenoCA(1),Liver-HCC(1),Ovary-AdenoCA(1),Panc-AdenoCA(1),Skin-Melanoma(1),SoftTissue-Liposarc(1)
DISRUPTION	'SMAD4	23	Panc-AdenoCA(12),Eso-AdenoCA(3),Prost-AdenoCA(2),Biliary-AdenoCA(1),Breast-AdenoCA(1),CNS-Medullo(1),ColoRect-AdenoCA(1),Head-SCC(1),Skin-Melanoma(1)
DISRUPTION	'SPAG16	23	Prost-AdenoCA(4),Eso-AdenoCA(2),Liver-HCC(2),Lung-SCC(2),Panc-AdenoCA(2),Skin-Melanoma(2),Bone-Osteosarc(1),Breast-AdenoCA(1),CNS-Oligo(1),Head-SCC(1),Lung-AdenoCA(1),Lymph-BNHL(1),Ovary-AdenoCA(1),Stomach-AdenoCA(1),Uterus-AdenoCA(1)
DISRUPTION	'ST18	23	Prost-AdenoCA(4),Ovary-AdenoCA(3),Panc-AdenoCA(3),Skin-Melanoma(3),Breast-AdenoCA(2),Liver-HCC(2),Bladder-TCC(1),Bone-Osteosarc(1),Cervix-AdenoCA(1),ColoRect-AdenoCA(1),Lymph-BNHL(1),Uterus-AdenoCA(1)
DISRUPTION	'SUMF1	23	Breast-AdenoCA(9),Panc-AdenoCA(3),Stomach-AdenoCA(2),Biliary-AdenoCA(1),Eso-AdenoCA(1),Head-SCC(1),Kidney-RCC(1),Liver-HCC(1),Lymph-BNHL(1),Panc-Endocrine(1),Skin-Melanoma(1),SoftTissue-Liposarc(1)
DISRUPTION	'TOX	23	Breast-AdenoCA(4),Lymph-BNHL(4),Ovary-AdenoCA(3),Prost-AdenoCA(3),Liver-HCC(2),Lung-AdenoCA(2),Bone-Osteosarc(1),Breast-LobularCA(1),Skin-Melanoma(1),SoftTissue-Liposarc(1),Uterus-AdenoCA(1)
DISRUPTION	'TRPC6	23	Liver-HCC(5),Skin-Melanoma(4),Breast-AdenoCA(2),Lung-SCC(2),Prost-AdenoCA(2),Bone-Osteosarc(1),Cervix-SCC(1),Head-SCC(1),Lung-AdenoCA(1),Ovary-AdenoCA(1),SoftTissue-Liposarc(1),Stomach-AdenoCA(1),Uterus-AdenoCA(1)
DISRUPTION	'USH2A	23	Breast-AdenoCA(7),Liver-HCC(3),Biliary-AdenoCA(2),Lung-AdenoCA(2),Bone-Osteosarc(1),Breast-LobularCA(1),CNS-GBM(1),Eso-AdenoCA(1),Ovary-AdenoCA(1),Prost-AdenoCA(1),Skin-Melanoma(1),SoftTissue-Liposarc(1),Stomach-AdenoCA(1)
EXON_SKIP	'LPP	23	Liver-HCC(6),Breast-AdenoCA(3),ColoRect-AdenoCA(2),Panc-AdenoCA(2),Stomach-AdenoCA(2),Bone-Osteosarc(1),Eso-AdenoCA(1),Head-SCC(1),Lung-SCC(1),Ovary-AdenoCA(1),Panc-Endocrine(1),Skin-Melanoma(1),SoftTissue-Leiomyo(1)
EXON_SKIP	'MAGI2	23	Skin-Melanoma(8),Bone-Osteosarc(5),Liver-HCC(3),Panc-AdenoCA(2),Eso-AdenoCA(1),Kidney-RCC(1),Ovary-AdenoCA(1),SoftTissue-Leiomyo(1),Stomach-AdenoCA(1)
EXON_SKIP	'NEGR1	23	Kidney-RCC(4),Stomach-AdenoCA(4),Bone-Osteosarc(3),Eso-AdenoCA(2),Skin-Melanoma(2),Bladder-TCC(1),Breast-AdenoCA(1),Head-SCC(1),Kidney-ChRCC(1),Liver-HCC(1),Ovary-AdenoCA(1),Panc-Endocrine(1),Prost-AdenoCA(1)
EXON_SKIP	'PCDH15	23	Ovary-AdenoCA(3),Skin-Melanoma(3),Eso-AdenoCA(2),Head-SCC(2),Lung-SCC(2),Prost-AdenoCA(2),Biliary-AdenoCA(1),Bone-Benign(1),Bone-Epith(1),Bone-Osteosarc(1),Breast-AdenoCA(1),ColoRect-AdenoCA(1),Liver-HCC(1),Panc-AdenoCA(1),Stomach-AdenoCA(1)
EXON_SKIP	'SND1	23	Liver-HCC(6),Stomach-AdenoCA(4),Breast-AdenoCA(2),Eso-AdenoCA(2),Ovary-AdenoCA(2),Bone-Osteosarc(1),Head-SCC(1),Kidney-ChRCC(1),Lung-SCC(1),Lymph-BNHL(1),Panc-AdenoCA(1),Skin-Melanoma(1)
FUSION_5	'AGBL4	23	Breast-AdenoCA(5),Panc-AdenoCA(5),Skin-Melanoma(3),Stomach-AdenoCA(3),Lymph-BNHL(2),Ovary-AdenoCA(2),Bone-Osteosarc(1),Eso-AdenoCA(1),Prost-AdenoCA(1)
FUSION_5	'CDK12	23	Breast-AdenoCA(9),Uterus-AdenoCA(8),Eso-AdenoCA(3),Prost-AdenoCA(2),SoftTissue-Leiomyo(1)
FUSION_5	'FCHSD2	23	Breast-AdenoCA(10),Skin-Melanoma(5),Liver-HCC(2),Bone-Osteosarc(1),Breast-LobularCA(1),Eso-AdenoCA(1),Ovary-AdenoCA(1),Panc-AdenoCA(1),SoftTissue-Liposarc(1)
FUSION_5	'MECOM	23	Eso-AdenoCA(6),Prost-AdenoCA(4),Uterus-AdenoCA(4),Liver-HCC(3),Ovary-AdenoCA(3),Breast-AdenoCA(1),SoftTissue-Liposarc(1),Stomach-AdenoCA(1)
FUSION_5	'MSRB3	23	SoftTissue-Liposarc(9),Prost-AdenoCA(4),Skin-Melanoma(3),Eso-AdenoCA(2),Panc-AdenoCA(2),Bone-Osteosarc(1),Breast-AdenoCA(1),Liver-HCC(1)
FUSION_5	'NBEA	23	Prost-AdenoCA(7),Breast-AdenoCA(3),Panc-AdenoCA(3),Ovary-AdenoCA(2),Skin-Melanoma(2),Bladder-TCC(1),Eso-AdenoCA(1),Kidney-ChRCC(1),Liver-HCC(1),Lung-AdenoCA(1),Stomach-AdenoCA(1)
FUSION_5	'R3HDM2	23	SoftTissue-Liposarc(8),CNS-GBM(7),Bone-Osteosarc(3),Stomach-AdenoCA(3),ColoRect-AdenoCA(1),Liver-HCC(1)
FUSION_5	'RP11-767I20.1	23	CNS-GBM(12),SoftTissue-Liposarc(6),Skin-Melanoma(3),Ovary-AdenoCA(1),Stomach-AdenoCA(1)
FUSION_5	'SLC45A3	23	Prost-AdenoCA(23)
FUSION_5	'TTC6	23	Prost-AdenoCA(7),Breast-AdenoCA(6),Panc-AdenoCA(3),Eso-AdenoCA(2),Biliary-AdenoCA(1),CNS-Medullo(1),Liver-HCC(1),Lymph-BNHL(1),Stomach-AdenoCA(1)
FUSION_3	'CDK14	23	Panc-AdenoCA(6),Eso-AdenoCA(4),Prost-AdenoCA(3),Stomach-AdenoCA(3),Liver-HCC(2),Bone-Osteosarc(1),Breast-AdenoCA(1),Ovary-AdenoCA(1),Skin-Melanoma(1),Uterus-AdenoCA(1)
FUSION_3	'CTNND2	23	SoftTissue-Liposarc(7),Bone-Osteosarc(3),Skin-Melanoma(3),Ovary-AdenoCA(2),Prost-AdenoCA(2),Breast-AdenoCA(1),Eso-AdenoCA(1),Liver-HCC(1),Lung-AdenoCA(1),Panc-AdenoCA(1),Stomach-AdenoCA(1)
FUSION_3	'EFNA3	23	Bone-Benign(17),Breast-AdenoCA(3),Uterus-AdenoCA(2),Prost-AdenoCA(1)
FUSION_3	'ETV6	23	Breast-AdenoCA(8),Bone-Osteosarc(3),Bladder-TCC(2),Prost-AdenoCA(2),ColoRect-AdenoCA(1),Eso-AdenoCA(1),Lung-SCC(1),Ovary-AdenoCA(1),Skin-Melanoma(1),SoftTissue-Leiomyo(1),Stomach-AdenoCA(1),Uterus-AdenoCA(1)
FUSION_3	'SMYD3	23	SoftTissue-Liposarc(5),Panc-AdenoCA(3),Stomach-AdenoCA(3),Bone-Osteosarc(2),CNS-GBM(2),Lung-SCC(2),Biliary-AdenoCA(1),Breast-AdenoCA(1),Liver-HCC(1),Lymph-BNHL(1),Skin-Melanoma(1),Uterus-AdenoCA(1)
FUSION_3	'TSHZ2	23	Stomach-AdenoCA(7),Liver-HCC(5),Breast-AdenoCA(3),Ovary-AdenoCA(2),SoftTissue-Liposarc(2),Eso-AdenoCA(1),Panc-AdenoCA(1),Skin-Melanoma(1),Uterus-AdenoCA(1)
DISRUPTION	'AC003088.1	22	Panc-AdenoCA(5),Ovary-AdenoCA(4),Liver-HCC(3),Eso-AdenoCA(2),Stomach-AdenoCA(2),Uterus-AdenoCA(2),Breast-AdenoCA(1),ColoRect-AdenoCA(1),Lung-SCC(1),Skin-Melanoma(1)
DISRUPTION	'AGAP1	22	Prost-AdenoCA(6),Breast-AdenoCA(3),Ovary-AdenoCA(3),Uterus-AdenoCA(3),Eso-AdenoCA(2),ColoRect-AdenoCA(1),Head-SCC(1),Lung-AdenoCA(1),Lymph-BNHL(1),Skin-Melanoma(1)
DISRUPTION	'AL163953.3	22	Panc-AdenoCA(6),Breast-AdenoCA(3),Biliary-AdenoCA(2),Ovary-AdenoCA(2),Bladder-TCC(1),Bone-Osteosarc(1),Breast-LobularCA(1),Eso-AdenoCA(1),Head-SCC(1),Liver-HCC(1),Prost-AdenoCA(1),Skin-Melanoma(1),Uterus-AdenoCA(1)
DISRUPTION	'ATF7IP	22	Prost-AdenoCA(6),Liver-HCC(4),Breast-AdenoCA(2),ColoRect-AdenoCA(2),Ovary-AdenoCA(2),Bone-Osteosarc(1),Head-SCC(1),Lymph-BNHL(1),Panc-AdenoCA(1),Skin-Melanoma(1),Stomach-AdenoCA(1)
DISRUPTION	'CAMK1D	22	Prost-AdenoCA(9),Breast-AdenoCA(7),Liver-HCC(2),Ovary-AdenoCA(2),Skin-Melanoma(1),Stomach-AdenoCA(1)
DISRUPTION	'CCDC171	22	Prost-AdenoCA(4),Panc-AdenoCA(3),Stomach-AdenoCA(3),Breast-AdenoCA(2),Eso-AdenoCA(2),Lung-SCC(2),Skin-Melanoma(2),Biliary-AdenoCA(1),Lymph-BNHL(1),Ovary-AdenoCA(1),SoftTissue-Leiomyo(1)
DISRUPTION	'CDH2	22	Panc-AdenoCA(8),Prost-AdenoCA(3),Breast-AdenoCA(2),Eso-AdenoCA(2),Bladder-TCC(1),Liver-HCC(1),Lymph-BNHL(1),Ovary-AdenoCA(1),Skin-Melanoma(1),SoftTissue-Leiomyo(1),SoftTissue-Liposarc(1)
DISRUPTION	'CDH9	22	Prost-AdenoCA(3),SoftTissue-Liposarc(3),Eso-AdenoCA(2),Liver-HCC(2),Ovary-AdenoCA(2),Panc-AdenoCA(2),Skin-Melanoma(2),Breast-AdenoCA(1),Kidney-ChRCC(1),Lung-AdenoCA(1),Lymph-BNHL(1),SoftTissue-Leiomyo(1),Uterus-AdenoCA(1)
DISRUPTION	'CEP112	22	Breast-AdenoCA(6),Skin-Melanoma(4),Bladder-TCC(1),Bone-Epith(1),CNS-GBM(1),ColoRect-AdenoCA(1),Eso-AdenoCA(1),Liver-HCC(1),Lung-AdenoCA(1),Lung-SCC(1),Ovary-AdenoCA(1),Panc-AdenoCA(1),Prost-AdenoCA(1),Stomach-AdenoCA(1)
DISRUPTION	'CNTLN	22	Breast-AdenoCA(4),Skin-Melanoma(4),Panc-AdenoCA(3),Bladder-TCC(2),Ovary-AdenoCA(2),Prost-AdenoCA(2),Biliary-AdenoCA(1),Bone-Osteosarc(1),Eso-AdenoCA(1),Liver-HCC(1),SoftTissue-Liposarc(1)
DISRUPTION	'DST	22	Breast-AdenoCA(4),Lung-SCC(4),Prost-AdenoCA(3),Stomach-AdenoCA(3),Bone-Benign(1),Bone-Osteosarc(1),Eso-AdenoCA(1),Head-SCC(1),Liver-HCC(1),Skin-Melanoma(1),SoftTissue-Liposarc(1),Uterus-AdenoCA(1)
DISRUPTION	'DYM	22	Breast-AdenoCA(5),Ovary-AdenoCA(3),Skin-Melanoma(2),Stomach-AdenoCA(2),Cervix-AdenoCA(1),Eso-AdenoCA(1),Liver-HCC(1),Lung-AdenoCA(1),Lung-SCC(1),Lymph-BNHL(1),Panc-AdenoCA(1),Prost-AdenoCA(1),SoftTissue-Liposarc(1),Uterus-AdenoCA(1)
DISRUPTION	'FRMD4B	22	Prost-AdenoCA(14),Eso-AdenoCA(1),Kidney-RCC(1),Liver-HCC(1),Lung-AdenoCA(1),Lung-SCC(1),Panc-AdenoCA(1),SoftTissue-Leiomyo(1),Stomach-AdenoCA(1)
DISRUPTION	'HMGA2	22	SoftTissue-Liposarc(12),Bone-Osteosarc(2),Panc-AdenoCA(2),Stomach-AdenoCA(2),Breast-AdenoCA(1),CNS-GBM(1),Ovary-AdenoCA(1),Skin-Melanoma(1)
DISRUPTION	'KMT2C	22	Breast-AdenoCA(6),Liver-HCC(4),Panc-AdenoCA(3),Prost-AdenoCA(3),Head-SCC(2),Cervix-SCC(1),Kidney-RCC(1),Ovary-AdenoCA(1),Stomach-AdenoCA(1)
DISRUPTION	'LINC00299	22	Prost-AdenoCA(9),Eso-AdenoCA(3),Liver-HCC(2),Panc-AdenoCA(2),Skin-Melanoma(2),Breast-AdenoCA(1),CNS-GBM(1),Ovary-AdenoCA(1),SoftTissue-Liposarc(1)
DISRUPTION	'MEI4	22	Prost-AdenoCA(16),Breast-AdenoCA(2),Ovary-AdenoCA(2),Skin-Melanoma(1),Stomach-AdenoCA(1)
DISRUPTION	'MYEOV	22	Breast-AdenoCA(7),Liver-HCC(7),Bladder-TCC(2),Breast-LobularCA(2),Skin-Melanoma(2),Lung-AdenoCA(1),Panc-AdenoCA(1)
DISRUPTION	'NBAS	22	Ovary-AdenoCA(6),Uterus-AdenoCA(4),Breast-AdenoCA(2),CNS-Medullo(2),Eso-AdenoCA(2),Liver-HCC(2),CNS-GBM(1),ColoRect-AdenoCA(1),Panc-AdenoCA(1),Skin-Melanoma(1)
DISRUPTION	'NCAM2	22	Breast-AdenoCA(3),Eso-AdenoCA(2),Lung-AdenoCA(2),Ovary-AdenoCA(2),Panc-AdenoCA(2),Bladder-TCC(1),Bone-Osteosarc(1),Head-SCC(1),Kidney-RCC(1),Liver-HCC(1),Lymph-BNHL(1),Prost-AdenoCA(1),SoftTissue-Leiomyo(1),SoftTissue-Liposarc(1),Stomach-AdenoCA(1),Uterus-AdenoCA(1)
DISRUPTION	'NEDD4L	22	Prost-AdenoCA(8),Eso-AdenoCA(4),Stomach-AdenoCA(3),Breast-AdenoCA(2),Panc-AdenoCA(2),Liver-HCC(1),Lymph-BNHL(1),Ovary-AdenoCA(1)
DISRUPTION	'NFIA	22	Ovary-AdenoCA(3),Skin-Melanoma(3),Breast-AdenoCA(2),CNS-GBM(2),Liver-HCC(2),Panc-AdenoCA(2),Stomach-AdenoCA(2),Biliary-AdenoCA(1),Bone-Osteosarc(1),Lung-AdenoCA(1),Lung-SCC(1),Prost-AdenoCA(1),Uterus-AdenoCA(1)
DISRUPTION	'NKAIN3	22	Panc-AdenoCA(5),Breast-AdenoCA(3),Ovary-AdenoCA(3),Eso-AdenoCA(2),Liver-HCC(2),Prost-AdenoCA(2),CNS-Medullo(1),Lung-AdenoCA(1),Panc-Endocrine(1),SoftTissue-Liposarc(1),Stomach-AdenoCA(1)
DISRUPTION	'OSBPL1A	22	Panc-AdenoCA(11),Stomach-AdenoCA(2),Breast-AdenoCA(1),CNS-Medullo(1),Eso-AdenoCA(1),Head-SCC(1),Ovary-AdenoCA(1),Prost-AdenoCA(1),Skin-Melanoma(1),SoftTissue-Leiomyo(1),Uterus-AdenoCA(1)
DISRUPTION	'PBX1	22	Prost-AdenoCA(6),SoftTissue-Liposarc(6),Biliary-AdenoCA(1),Bladder-TCC(1),Bone-Benign(1),Bone-Osteosarc(1),Breast-AdenoCA(1),CNS-Medullo(1),Cervix-SCC(1),Kidney-RCC(1),Liver-HCC(1),Stomach-AdenoCA(1)
DISRUPTION	'PDE10A	22	Panc-AdenoCA(4),Skin-Melanoma(4),Breast-AdenoCA(3),Eso-AdenoCA(3),Liver-HCC(2),Uterus-AdenoCA(2),Bone-Osteosarc(1),CNS-GBM(1),Lymph-BNHL(1),Prost-AdenoCA(1)
DISRUPTION	'PLCH1	22	Prost-AdenoCA(7),Breast-AdenoCA(3),Uterus-AdenoCA(3),Skin-Melanoma(2),Bone-Osteosarc(1),Lung-SCC(1),Lymph-BNHL(1),Ovary-AdenoCA(1),Panc-AdenoCA(1),SoftTissue-Liposarc(1),Stomach-AdenoCA(1)
DISRUPTION	'POU2F1	22	Prost-AdenoCA(11),Breast-AdenoCA(3),SoftTissue-Liposarc(3),Lung-AdenoCA(2),Cervix-SCC(1),Lung-SCC(1),Lymph-BNHL(1)
DISRUPTION	'R3HDM2	22	CNS-GBM(6),SoftTissue-Liposarc(4),Liver-HCC(2),Lung-AdenoCA(2),Panc-AdenoCA(2),Stomach-AdenoCA(2),ColoRect-AdenoCA(1),Ovary-AdenoCA(1),Prost-AdenoCA(1),Skin-Melanoma(1)
DISRUPTION	'RAB3IP	22	SoftTissue-Liposarc(7),Bone-Osteosarc(2),Eso-AdenoCA(2),Lung-AdenoCA(2),Skin-Melanoma(2),Stomach-AdenoCA(2),Breast-AdenoCA(1),CNS-GBM(1),Head-SCC(1),Liver-HCC(1),Ovary-AdenoCA(1)
DISRUPTION	'REV3L	22	Prost-AdenoCA(10),Bone-Osteosarc(2),Breast-AdenoCA(2),Liver-HCC(2),Uterus-AdenoCA(2),Biliary-AdenoCA(1),Eso-AdenoCA(1),SoftTissue-Leiomyo(1),SoftTissue-Liposarc(1)
DISRUPTION	'RP11-122C21.1	22	Prost-AdenoCA(11),Breast-AdenoCA(2),Liver-HCC(2),Ovary-AdenoCA(2),Eso-AdenoCA(1),Lung-AdenoCA(1),Panc-AdenoCA(1),Skin-Melanoma(1),SoftTissue-Liposarc(1)
DISRUPTION	'RP11-541P9.3	22	Prost-AdenoCA(4),SoftTissue-Liposarc(4),Liver-HCC(3),Ovary-AdenoCA(3),Stomach-AdenoCA(2),Bladder-TCC(1),CNS-GBM(1),CNS-Medullo(1),Eso-AdenoCA(1),Head-SCC(1),Kidney-RCC(1)
DISRUPTION	'SLC20A2	22	Breast-AdenoCA(6),Ovary-AdenoCA(4),Liver-HCC(3),ColoRect-AdenoCA(2),Panc-AdenoCA(2),CNS-GBM(1),Eso-AdenoCA(1),Lung-AdenoCA(1),Lung-SCC(1),Stomach-AdenoCA(1)
DISRUPTION	'SLC35E3	22	SoftTissue-Liposarc(12),Breast-AdenoCA(3),Eso-AdenoCA(2),Stomach-AdenoCA(2),Bladder-TCC(1),CNS-GBM(1),Skin-Melanoma(1)
DISRUPTION	'SNX29	22	Breast-AdenoCA(6),Ovary-AdenoCA(4),CNS-GBM(2),Eso-AdenoCA(2),Bladder-TCC(1),Bone-Osteosarc(1),Liver-HCC(1),Lung-SCC(1),Lymph-BNHL(1),Panc-AdenoCA(1),Skin-Melanoma(1),SoftTissue-Liposarc(1)
DISRUPTION	'SORCS1	22	Prost-AdenoCA(5),Liver-HCC(3),Ovary-AdenoCA(3),Biliary-AdenoCA(1),Breast-AdenoCA(1),CNS-GBM(1),ColoRect-AdenoCA(1),Eso-AdenoCA(1),Kidney-RCC(1),Lung-AdenoCA(1),Lymph-BNHL(1),Panc-AdenoCA(1),Skin-Melanoma(1),Stomach-AdenoCA(1)
DISRUPTION	'SOX5	22	Prost-AdenoCA(5),Liver-HCC(4),Panc-AdenoCA(3),Bladder-TCC(2),Breast-AdenoCA(2),Ovary-AdenoCA(2),Bone-Osteosarc(1),Cervix-SCC(1),SoftTissue-Liposarc(1),Stomach-AdenoCA(1)
DISRUPTION	'TLN2	22	Ovary-AdenoCA(4),Breast-AdenoCA(3),Panc-AdenoCA(3),Eso-AdenoCA(2),Liver-HCC(2),Skin-Melanoma(2),Biliary-AdenoCA(1),CNS-GBM(1),Kidney-ChRCC(1),Lung-AdenoCA(1),Lymph-BNHL(1),Uterus-AdenoCA(1)
DISRUPTION	'TMEM132B	22	Prost-AdenoCA(11),Bone-Osteosarc(2),Ovary-AdenoCA(2),SoftTissue-Liposarc(2),Breast-AdenoCA(1),Kidney-ChRCC(1),Lung-SCC(1),Panc-AdenoCA(1),Uterus-AdenoCA(1)
DISRUPTION	'VMP1	22	Breast-AdenoCA(10),Panc-AdenoCA(3),Eso-AdenoCA(2),Head-SCC(2),Bladder-TCC(1),Cervix-AdenoCA(1),Lung-SCC(1),Ovary-AdenoCA(1),Uterus-AdenoCA(1)
DISRUPTION	'hsa-mir-490.1	22	Prost-AdenoCA(8),Skin-Melanoma(5),Liver-HCC(2),Ovary-AdenoCA(2),Panc-AdenoCA(2),Eso-AdenoCA(1),Lung-SCC(1),SoftTissue-Liposarc(1)
FUSION_5	'CADM2	22	Breast-AdenoCA(7),Lung-SCC(3),Biliary-AdenoCA(2),Panc-AdenoCA(2),Stomach-AdenoCA(2),Uterus-AdenoCA(2),Bone-Osteosarc(1),CNS-Medullo(1),Lung-AdenoCA(1),Skin-Melanoma(1)
FUSION_5	'CSMD1	22	Breast-AdenoCA(5),Stomach-AdenoCA(4),SoftTissue-Liposarc(3),Eso-AdenoCA(2),Biliary-AdenoCA(1),Bone-Osteosarc(1),ColoRect-AdenoCA(1),Lung-AdenoCA(1),Lung-SCC(1),Ovary-AdenoCA(1),Panc-AdenoCA(1),SoftTissue-Leiomyo(1)
FUSION_5	'ESR1	22	Breast-AdenoCA(7),Ovary-AdenoCA(4),Prost-AdenoCA(4),Uterus-AdenoCA(2),CNS-Oligo(1),ColoRect-AdenoCA(1),Eso-AdenoCA(1),Liver-HCC(1),SoftTissue-Liposarc(1)
FUSION_5	'FAM107B	22	Prost-AdenoCA(18),Breast-AdenoCA(1),ColoRect-AdenoCA(1),Eso-AdenoCA(1),Stomach-AdenoCA(1)
FUSION_5	'PACSIN2	22	Prost-AdenoCA(8),Breast-AdenoCA(4),Eso-AdenoCA(4),Panc-AdenoCA(3),Head-SCC(1),Lung-AdenoCA(1),Lung-SCC(1)
FUSION_5	'RNLS	22	Prost-AdenoCA(13),Breast-AdenoCA(4),Ovary-AdenoCA(2),Skin-Melanoma(2),Eso-AdenoCA(1)
FUSION_3	'AUTS2	22	Skin-Melanoma(5),Bone-Osteosarc(3),Ovary-AdenoCA(3),Breast-AdenoCA(2),ColoRect-AdenoCA(2),Prost-AdenoCA(2),Eso-AdenoCA(1),Liver-HCC(1),Lung-SCC(1),Panc-AdenoCA(1),Stomach-AdenoCA(1)
FUSION_3	'CDH18	22	SoftTissue-Liposarc(6),Skin-Melanoma(5),Panc-AdenoCA(3),Lung-AdenoCA(2),Bone-Osteosarc(1),Breast-AdenoCA(1),CNS-Medullo(1),Liver-HCC(1),Lung-SCC(1),Ovary-AdenoCA(1)
FUSION_3	'CNBD1	22	Prost-AdenoCA(11),Lung-AdenoCA(3),Bladder-TCC(1),Eso-AdenoCA(1),Liver-HCC(1),Ovary-AdenoCA(1),Panc-AdenoCA(1),SoftTissue-Liposarc(1),Stomach-AdenoCA(1),Uterus-AdenoCA(1)
FUSION_3	'CSMD1	22	Prost-AdenoCA(6),Lung-AdenoCA(5),Breast-AdenoCA(3),CNS-Medullo(1),Eso-AdenoCA(1),Head-SCC(1),Kidney-RCC(1),Lung-SCC(1),Ovary-AdenoCA(1),Skin-Melanoma(1),SoftTissue-Liposarc(1)
FUSION_3	'LSAMP	22	Breast-AdenoCA(4),CNS-Medullo(3),Ovary-AdenoCA(3),Liver-HCC(2),Lymph-BNHL(2),Eso-AdenoCA(1),Head-SCC(1),Panc-AdenoCA(1),Prost-AdenoCA(1),Skin-Melanoma(1),SoftTissue-Leiomyo(1),SoftTissue-Liposarc(1),Uterus-AdenoCA(1)
FUSION_3	'POU6F2	22	Prost-AdenoCA(7),Breast-AdenoCA(6),CNS-GBM(3),Ovary-AdenoCA(2),Skin-Melanoma(2),Liver-HCC(1),Uterus-AdenoCA(1)
FUSION_3	'RAD51B	22	Breast-AdenoCA(5),Liver-HCC(5),Panc-AdenoCA(3),Ovary-AdenoCA(2),SoftTissue-Liposarc(2),Bladder-TCC(1),Bone-Osteosarc(1),Eso-AdenoCA(1),Prost-AdenoCA(1),Uterus-AdenoCA(1)
FUSION_3	'RALYL	22	SoftTissue-Liposarc(5),Breast-AdenoCA(4),Breast-LobularCA(2),Liver-HCC(2),Lung-AdenoCA(2),Ovary-AdenoCA(2),Bladder-TCC(1),Bone-Osteosarc(1),Panc-Endocrine(1),Prost-AdenoCA(1),Stomach-AdenoCA(1)
FUSION_3	'RP11-127H5.1	22	Liver-HCC(6),Breast-AdenoCA(5),Prost-AdenoCA(4),Skin-Melanoma(3),Ovary-AdenoCA(2),Panc-AdenoCA(1),Stomach-AdenoCA(1)
FUSION_3	'RP11-230G5.2	22	SoftTissue-Liposarc(11),Breast-AdenoCA(4),Ovary-AdenoCA(2),Panc-AdenoCA(2),Bone-Osteosarc(1),Eso-AdenoCA(1),Skin-Melanoma(1)
FUSION_3	'RP11-420N3.2	22	Panc-AdenoCA(7),Bone-Osteosarc(4),Breast-AdenoCA(4),Liver-HCC(2),Ovary-AdenoCA(2),CNS-GBM(1),Eso-AdenoCA(1),Stomach-AdenoCA(1)
FUSION_3	'TBC1D5	22	Biliary-AdenoCA(4),Prost-AdenoCA(4),Breast-AdenoCA(3),Ovary-AdenoCA(2),SoftTissue-Liposarc(2),Stomach-AdenoCA(2),Bone-Osteosarc(1),Eso-AdenoCA(1),Liver-HCC(1),Panc-AdenoCA(1),Uterus-AdenoCA(1)
DISRUPTION	'AFF3	21	Lung-SCC(4),Liver-HCC(3),Ovary-AdenoCA(3),Eso-AdenoCA(2),Skin-Melanoma(2),Bone-Osteosarc(1),Breast-AdenoCA(1),Head-SCC(1),Panc-Endocrine(1),Prost-AdenoCA(1),SoftTissue-Leiomyo(1),Stomach-AdenoCA(1)
DISRUPTION	'ANO2	21	Prost-AdenoCA(6),Ovary-AdenoCA(4),Breast-AdenoCA(2),Liver-HCC(2),Panc-AdenoCA(2),Bladder-TCC(1),CNS-Medullo(1),Lymph-CLL(1),SoftTissue-Liposarc(1),Uterus-AdenoCA(1)
DISRUPTION	'ARID1A	21	Liver-HCC(5),Breast-AdenoCA(3),Skin-Melanoma(3),Eso-AdenoCA(2),Ovary-AdenoCA(2),Uterus-AdenoCA(2),ColoRect-AdenoCA(1),Lung-AdenoCA(1),Panc-AdenoCA(1),Prost-AdenoCA(1)
DISRUPTION	'BANK1	21	Prost-AdenoCA(13),Eso-AdenoCA(2),Biliary-AdenoCA(1),Bone-Osteosarc(1),Breast-AdenoCA(1),Liver-HCC(1),Panc-AdenoCA(1),SoftTissue-Liposarc(1)
DISRUPTION	'CALN1	21	Breast-AdenoCA(3),Eso-AdenoCA(3),Liver-HCC(3),Ovary-AdenoCA(3),Skin-Melanoma(3),Panc-AdenoCA(2),Bone-Osteosarc(1),Lung-AdenoCA(1),SoftTissue-Liposarc(1),Stomach-AdenoCA(1)
DISRUPTION	'CDH4	21	Breast-AdenoCA(8),Bone-Osteosarc(3),Skin-Melanoma(3),CNS-Medullo(1),ColoRect-AdenoCA(1),Eso-AdenoCA(1),Liver-HCC(1),Panc-AdenoCA(1),Stomach-AdenoCA(1),Uterus-AdenoCA(1)
DISRUPTION	'CDYL	21	Prost-AdenoCA(9),Breast-AdenoCA(2),CNS-GBM(2),Ovary-AdenoCA(2),Skin-Melanoma(2),Biliary-AdenoCA(1),Bone-Osteosarc(1),Liver-HCC(1),Lymph-BNHL(1)
DISRUPTION	'CT49	21	Eso-AdenoCA(3),Ovary-AdenoCA(3),SoftTissue-Liposarc(3),Liver-HCC(2),Bone-Epith(1),Bone-Osteosarc(1),Breast-AdenoCA(1),Breast-LobularCA(1),CNS-GBM(1),Head-SCC(1),Lung-SCC(1),Panc-AdenoCA(1),Prost-AdenoCA(1),Skin-Melanoma(1)
DISRUPTION	'CUX1	21	Panc-AdenoCA(4),Lung-AdenoCA(2),Ovary-AdenoCA(2),Prost-AdenoCA(2),Stomach-AdenoCA(2),Bladder-TCC(1),Bone-Osteosarc(1),Eso-AdenoCA(1),Kidney-RCC(1),Liver-HCC(1),Lymph-BNHL(1),Skin-Melanoma(1),SoftTissue-Liposarc(1),Uterus-AdenoCA(1)
DISRUPTION	'EIF2B5	21	Breast-AdenoCA(4),Eso-AdenoCA(4),Lung-SCC(3),Bone-Osteosarc(2),Liver-HCC(2),Panc-AdenoCA(2),Breast-LobularCA(1),CNS-GBM(1),Ovary-AdenoCA(1),Skin-Melanoma(1)
DISRUPTION	'ERC2	21	Breast-AdenoCA(3),Kidney-RCC(3),Prost-AdenoCA(3),CNS-GBM(2),Skin-Melanoma(2),Stomach-AdenoCA(2),Biliary-AdenoCA(1),ColoRect-AdenoCA(1),Eso-AdenoCA(1),Lung-SCC(1),SoftTissue-Leiomyo(1),Uterus-AdenoCA(1)
DISRUPTION	'FABP6	21	Prost-AdenoCA(15),Liver-HCC(2),Breast-AdenoCA(1),CNS-Medullo(1),Kidney-ChRCC(1),SoftTissue-Liposarc(1)
DISRUPTION	'FAM65C	21	Stomach-AdenoCA(4),Breast-AdenoCA(3),Eso-AdenoCA(2),Liver-HCC(2),Ovary-AdenoCA(2),SoftTissue-Liposarc(2),Biliary-AdenoCA(1),Lung-SCC(1),Panc-AdenoCA(1),Prost-AdenoCA(1),Skin-Melanoma(1),Uterus-AdenoCA(1)
DISRUPTION	'FBXL20	21	Breast-AdenoCA(11),CNS-GBM(1),Cervix-SCC(1),Eso-AdenoCA(1),Head-SCC(1),Liver-HCC(1),Ovary-AdenoCA(1),Panc-AdenoCA(1),Skin-Melanoma(1),SoftTissue-Leiomyo(1),Uterus-AdenoCA(1)
DISRUPTION	'FBXL7	21	SoftTissue-Liposarc(4),Breast-AdenoCA(3),Ovary-AdenoCA(3),Skin-Melanoma(3),Liver-HCC(2),Prost-AdenoCA(2),Bone-Osteosarc(1),Eso-AdenoCA(1),Lung-AdenoCA(1),SoftTissue-Leiomyo(1)
DISRUPTION	'FRMD4A	21	Prost-AdenoCA(9),Breast-AdenoCA(4),Ovary-AdenoCA(4),Panc-AdenoCA(2),Bone-Osteosarc(1),ColoRect-AdenoCA(1)
DISRUPTION	'GPR98	21	Liver-HCC(6),Prost-AdenoCA(4),Breast-AdenoCA(2),Ovary-AdenoCA(2),Panc-AdenoCA(2),Skin-Melanoma(2),Bone-Osteosarc(1),Kidney-RCC(1),Uterus-AdenoCA(1)
DISRUPTION	'HNF4G	21	Prost-AdenoCA(11),Breast-AdenoCA(3),Ovary-AdenoCA(2),Eso-AdenoCA(1),Liver-HCC(1),Lung-AdenoCA(1),Skin-Melanoma(1),SoftTissue-Liposarc(1)
DISRUPTION	'JUP	21	Eso-AdenoCA(5),Breast-AdenoCA(4),Panc-AdenoCA(4),Prost-AdenoCA(2),Stomach-AdenoCA(2),CNS-Medullo(1),Cervix-SCC(1),Ovary-AdenoCA(1),SoftTissue-Liposarc(1)
DISRUPTION	'KAT6A	21	Panc-AdenoCA(4),Prost-AdenoCA(4),Liver-HCC(3),Breast-AdenoCA(2),Skin-Melanoma(2),Stomach-AdenoCA(2),Bone-Osteosarc(1),Breast-LobularCA(1),Eso-AdenoCA(1),Ovary-AdenoCA(1)
DISRUPTION	'LINC00536	21	Breast-AdenoCA(6),Liver-HCC(4),Panc-AdenoCA(2),SoftTissue-Liposarc(2),Bone-Osteosarc(1),Head-SCC(1),Kidney-ChRCC(1),Lymph-BNHL(1),Ovary-AdenoCA(1),Prost-AdenoCA(1),Uterus-AdenoCA(1)
DISRUPTION	'MAML2	21	Breast-AdenoCA(5),Skin-Melanoma(4),Ovary-AdenoCA(2),Uterus-AdenoCA(2),Biliary-AdenoCA(1),Bone-Osteosarc(1),Eso-AdenoCA(1),Kidney-RCC(1),Liver-HCC(1),Panc-AdenoCA(1),Prost-AdenoCA(1),Stomach-AdenoCA(1)
DISRUPTION	'MDGA2	21	Breast-AdenoCA(4),Panc-AdenoCA(4),Liver-HCC(3),Prost-AdenoCA(3),Biliary-AdenoCA(2),Eso-AdenoCA(1),Head-SCC(1),Lung-SCC(1),Ovary-AdenoCA(1),SoftTissue-Liposarc(1)
DISRUPTION	'MYO1D	21	Breast-AdenoCA(4),Eso-AdenoCA(3),Panc-AdenoCA(3),Bladder-TCC(2),Bone-Osteosarc(2),Biliary-AdenoCA(1),Lung-SCC(1),Ovary-AdenoCA(1),Skin-Melanoma(1),SoftTissue-Liposarc(1),Stomach-AdenoCA(1),Uterus-AdenoCA(1)
DISRUPTION	'NELL2	21	Liver-HCC(3),SoftTissue-Liposarc(3),Bone-Osteosarc(2),CNS-GBM(2),Head-SCC(2),Lung-SCC(2),Panc-AdenoCA(2),Breast-AdenoCA(1),Cervix-SCC(1),Ovary-AdenoCA(1),Prost-AdenoCA(1),Skin-Melanoma(1)
DISRUPTION	'PITPNC1	21	Breast-AdenoCA(5),Eso-AdenoCA(2),Liver-HCC(2),Ovary-AdenoCA(2),Prost-AdenoCA(2),Skin-Melanoma(2),Bladder-TCC(1),Bone-Osteosarc(1),ColoRect-AdenoCA(1),Lung-SCC(1),Lymph-BNHL(1),SoftTissue-Liposarc(1)
DISRUPTION	'PKHD1	21	Breast-AdenoCA(4),Panc-AdenoCA(3),Stomach-AdenoCA(3),Bone-Osteosarc(2),Uterus-AdenoCA(2),Bone-Benign(1),Breast-LobularCA(1),Cervix-SCC(1),Eso-AdenoCA(1),Ovary-AdenoCA(1),Skin-Melanoma(1),SoftTissue-Liposarc(1)
DISRUPTION	'PLCL1	21	Prost-AdenoCA(8),Breast-AdenoCA(2),Ovary-AdenoCA(2),Bone-Benign(1),Bone-Osteosarc(1),Eso-AdenoCA(1),Liver-HCC(1),Lymph-BNHL(1),Panc-AdenoCA(1),Skin-Melanoma(1),SoftTissue-Leiomyo(1),Stomach-AdenoCA(1)
DISRUPTION	'PTPRK	21	Prost-AdenoCA(4),ColoRect-AdenoCA(3),Ovary-AdenoCA(3),Panc-AdenoCA(2),SoftTissue-Liposarc(2),Uterus-AdenoCA(2),Bone-Osteosarc(1),Breast-AdenoCA(1),Liver-HCC(1),Lung-SCC(1),Skin-Melanoma(1)
DISRUPTION	'RBFOX3	21	Prost-AdenoCA(6),Liver-HCC(3),Breast-AdenoCA(2),Skin-Melanoma(2),Biliary-AdenoCA(1),CNS-Medullo(1),Head-SCC(1),Panc-AdenoCA(1),SoftTissue-Leiomyo(1),SoftTissue-Liposarc(1),Stomach-AdenoCA(1),Uterus-AdenoCA(1)
DISRUPTION	'RGS7	21	Breast-AdenoCA(4),Panc-AdenoCA(4),Eso-AdenoCA(3),Liver-HCC(3),Prost-AdenoCA(2),Skin-Melanoma(2),Bone-Osteosarc(1),CNS-GBM(1),SoftTissue-Liposarc(1)
DISRUPTION	'RNF219-AS1	21	Prost-AdenoCA(5),ColoRect-AdenoCA(4),Ovary-AdenoCA(2),Bladder-TCC(1),Breast-AdenoCA(1),CNS-Oligo(1),Eso-AdenoCA(1),Kidney-ChRCC(1),Liver-HCC(1),Lymph-BNHL(1),Panc-AdenoCA(1),SoftTissue-Liposarc(1),Stomach-AdenoCA(1)
DISRUPTION	'RNLS	21	Prost-AdenoCA(9),Breast-AdenoCA(2),CNS-GBM(2),Liver-HCC(2),Skin-Melanoma(2),Head-SCC(1),Lung-SCC(1),Lymph-BNHL(1),Stomach-AdenoCA(1)
DISRUPTION	'RP11-230G5.2	21	SoftTissue-Liposarc(6),Panc-AdenoCA(3),Breast-AdenoCA(2),Ovary-AdenoCA(2),Skin-Melanoma(2),Bone-Osteosarc(1),CNS-GBM(1),Eso-AdenoCA(1),Lung-AdenoCA(1),Stomach-AdenoCA(1),Uterus-AdenoCA(1)
DISRUPTION	'RP11-385J1.2	21	Prost-AdenoCA(5),Breast-AdenoCA(3),Lung-SCC(3),Panc-AdenoCA(3),Eso-AdenoCA(2),Liver-HCC(2),Bone-Osteosarc(1),Head-SCC(1),Lung-AdenoCA(1)
DISRUPTION	'RP11-81H14.2	21	SoftTissue-Liposarc(8),Eso-AdenoCA(4),Prost-AdenoCA(4),Breast-AdenoCA(2),Stomach-AdenoCA(2),CNS-GBM(1)
DISRUPTION	'SPECC1	21	Breast-AdenoCA(4),Skin-Melanoma(3),Liver-HCC(2),Lung-SCC(2),Ovary-AdenoCA(2),Bone-Epith(1),Bone-Osteosarc(1),Breast-LobularCA(1),Eso-AdenoCA(1),Lung-AdenoCA(1),Panc-AdenoCA(1),SoftTissue-Liposarc(1),Stomach-AdenoCA(1)
DISRUPTION	'STAB2	21	Prost-AdenoCA(10),Breast-AdenoCA(2),Liver-HCC(2),SoftTissue-Liposarc(2),Stomach-AdenoCA(2),Ovary-AdenoCA(1),Panc-AdenoCA(1),Skin-Melanoma(1)
DISRUPTION	'STAU2	21	Prost-AdenoCA(6),Breast-AdenoCA(4),Liver-HCC(4),Ovary-AdenoCA(2),Lung-AdenoCA(1),Panc-AdenoCA(1),Skin-Melanoma(1),SoftTissue-Liposarc(1),Stomach-AdenoCA(1)
DISRUPTION	'TMEM117	21	Ovary-AdenoCA(4),Lymph-BNHL(3),SoftTissue-Liposarc(3),Stomach-AdenoCA(3),Prost-AdenoCA(2),Breast-AdenoCA(1),CNS-GBM(1),Cervix-SCC(1),ColoRect-AdenoCA(1),Lung-SCC(1),Skin-Melanoma(1)
DISRUPTION	'TMTC2	21	SoftTissue-Liposarc(6),Skin-Melanoma(3),Stomach-AdenoCA(3),Ovary-AdenoCA(2),Bone-Osteosarc(1),Breast-AdenoCA(1),Eso-AdenoCA(1),Liver-HCC(1),Lymph-BNHL(1),Panc-AdenoCA(1),Uterus-AdenoCA(1)
DISRUPTION	'TPRG1	21	Lung-SCC(5),Breast-AdenoCA(4),Liver-HCC(3),CNS-GBM(2),Ovary-AdenoCA(2),Eso-AdenoCA(1),Head-SCC(1),Panc-AdenoCA(1),SoftTissue-Liposarc(1),Stomach-AdenoCA(1)
DISRUPTION	'TSHZ2	21	Breast-AdenoCA(7),Skin-Melanoma(4),Stomach-AdenoCA(3),Bone-Osteosarc(2),CNS-Medullo(1),Ovary-AdenoCA(1),Panc-AdenoCA(1),Prost-AdenoCA(1),Uterus-AdenoCA(1)
DISRUPTION	'USP6NL	21	Prost-AdenoCA(11),Liver-HCC(5),Breast-AdenoCA(2),Ovary-AdenoCA(2),Stomach-AdenoCA(1)
DISRUPTION	'UTRN	21	Ovary-AdenoCA(4),Prost-AdenoCA(4),Breast-AdenoCA(2),Eso-AdenoCA(2),Liver-HCC(2),Skin-Melanoma(2),Biliary-AdenoCA(1),Bone-Osteosarc(1),ColoRect-AdenoCA(1),Panc-Endocrine(1),Stomach-AdenoCA(1)
DISRUPTION	'VWA8	21	Eso-AdenoCA(3),Liver-HCC(3),Breast-AdenoCA(2),Ovary-AdenoCA(2),Panc-AdenoCA(2),Prost-AdenoCA(2),Uterus-AdenoCA(2),Biliary-AdenoCA(1),Lung-AdenoCA(1),Lung-SCC(1),Lymph-BNHL(1),Skin-Melanoma(1)
EXON_SKIP	'CDK14	21	Eso-AdenoCA(7),Liver-HCC(4),Ovary-AdenoCA(4),Stomach-AdenoCA(2),Bone-Osteosarc(1),Breast-AdenoCA(1),SoftTissue-Liposarc(1),Uterus-AdenoCA(1)
EXON_SKIP	'PTEN	21	Prost-AdenoCA(7),Breast-AdenoCA(4),Liver-HCC(4),Lung-SCC(2),CNS-GBM(1),ColoRect-AdenoCA(1),Head-SCC(1),Skin-Melanoma(1)
EXON_SKIP	'RB1	21	Liver-HCC(6),Breast-AdenoCA(4),Panc-AdenoCA(3),Ovary-AdenoCA(2),Biliary-AdenoCA(1),Bone-Osteosarc(1),CNS-GBM(1),Kidney-ChRCC(1),Lung-AdenoCA(1),SoftTissue-Leiomyo(1)
ITD	'NF1	21	Ovary-AdenoCA(15),Breast-AdenoCA(2),Bone-Osteosarc(1),Eso-AdenoCA(1),Panc-AdenoCA(1),Skin-Melanoma(1)
FUSION_5	'AQP4-AS1	21	Panc-AdenoCA(5),Breast-AdenoCA(3),Lung-SCC(3),Ovary-AdenoCA(2),Skin-Melanoma(2),Biliary-AdenoCA(1),Bone-Osteosarc(1),Eso-AdenoCA(1),Lymph-BNHL(1),Prost-AdenoCA(1),Stomach-AdenoCA(1)
FUSION_5	'PDE10A	21	CNS-GBM(8),Prost-AdenoCA(4),Breast-AdenoCA(2),Liver-HCC(2),Bone-Osteosarc(1),Cervix-SCC(1),Eso-AdenoCA(1),Skin-Melanoma(1),Stomach-AdenoCA(1)
FUSION_5	'PRKCA	21	Breast-AdenoCA(6),Eso-AdenoCA(5),Liver-HCC(3),Prost-AdenoCA(2),Bone-Osteosarc(1),CNS-GBM(1),Lung-SCC(1),Panc-AdenoCA(1),Skin-Melanoma(1)
FUSION_5	'PTPRT	21	Breast-AdenoCA(8),SoftTissue-Liposarc(4),Ovary-AdenoCA(2),Panc-AdenoCA(2),ColoRect-AdenoCA(1),Lung-SCC(1),Skin-Melanoma(1),SoftTissue-Leiomyo(1),Stomach-AdenoCA(1)
FUSION_5	'RP11-127H5.1	21	Breast-AdenoCA(4),Prost-AdenoCA(4),Liver-HCC(3),Skin-Melanoma(3),Ovary-AdenoCA(2),Bladder-TCC(1),Eso-AdenoCA(1),Lung-AdenoCA(1),Panc-AdenoCA(1),SoftTissue-Liposarc(1)
FUSION_5	'RP11-753H16.3	21	SoftTissue-Liposarc(8),Ovary-AdenoCA(6),Skin-Melanoma(3),Breast-AdenoCA(2),Head-SCC(1),Lung-SCC(1)
FUSION_5	'RYR2	21	Breast-AdenoCA(9),CNS-GBM(2),SoftTissue-Liposarc(2),Biliary-AdenoCA(1),Head-SCC(1),Liver-HCC(1),Lung-SCC(1),Lymph-BNHL(1),Prost-AdenoCA(1),Stomach-AdenoCA(1),Uterus-AdenoCA(1)
FUSION_5	'SOX2-OT	21	Liver-HCC(5),Breast-AdenoCA(3),Ovary-AdenoCA(2),Skin-Melanoma(2),SoftTissue-Leiomyo(2),Uterus-AdenoCA(2),Biliary-AdenoCA(1),CNS-GBM(1),Eso-AdenoCA(1),Lung-SCC(1),Panc-AdenoCA(1)
FUSION_5	'TANC2	21	Breast-AdenoCA(8),SoftTissue-Liposarc(4),Panc-AdenoCA(2),Prost-AdenoCA(2),Skin-Melanoma(2),Bone-Osteosarc(1),ColoRect-AdenoCA(1),Lymph-BNHL(1)
FUSION_5	'TLN2	21	Eso-AdenoCA(4),Skin-Melanoma(4),Breast-AdenoCA(2),Kidney-ChRCC(2),Liver-HCC(2),Prost-AdenoCA(2),Bladder-TCC(1),Head-SCC(1),Ovary-AdenoCA(1),Panc-AdenoCA(1),Uterus-AdenoCA(1)
FUSION_5	'USP32	21	Breast-AdenoCA(11),Skin-Melanoma(3),Kidney-RCC(2),Panc-AdenoCA(2),Bladder-TCC(1),Eso-AdenoCA(1),Uterus-AdenoCA(1)
FUSION_5	'UVRAG	21	Breast-AdenoCA(6),Skin-Melanoma(6),Ovary-AdenoCA(4),Liver-HCC(3),ColoRect-AdenoCA(1),Lymph-BNHL(1)
FUSION_3	'AGBL4	21	Prost-AdenoCA(6),Panc-AdenoCA(3),Liver-HCC(2),Lung-SCC(2),Skin-Melanoma(2),Eso-AdenoCA(1),Lymph-BNHL(1),Ovary-AdenoCA(1),SoftTissue-Liposarc(1),Stomach-AdenoCA(1),Uterus-AdenoCA(1)
FUSION_3	'EGFEM1P	21	Ovary-AdenoCA(9),Breast-AdenoCA(2),Panc-AdenoCA(2),SoftTissue-Liposarc(2),Cervix-SCC(1),Eso-AdenoCA(1),Prost-AdenoCA(1),Skin-Melanoma(1),SoftTissue-Leiomyo(1),Uterus-AdenoCA(1)
FUSION_3	'EPHA6	21	Prost-AdenoCA(10),Breast-AdenoCA(3),Ovary-AdenoCA(2),Panc-AdenoCA(2),Bone-Benign(1),ColoRect-AdenoCA(1),Eso-AdenoCA(1),Kidney-RCC(1)
FUSION_3	'FAM135B	21	Prost-AdenoCA(12),Breast-AdenoCA(4),Lung-SCC(2),Eso-AdenoCA(1),Panc-AdenoCA(1),Skin-Melanoma(1)
FUSION_3	'IGHJ4	21	Lymph-CLL(11),Lymph-BNHL(10)
FUSION_3	'NPAS3	21	Panc-AdenoCA(4),Uterus-AdenoCA(3),Biliary-AdenoCA(2),Breast-AdenoCA(2),Ovary-AdenoCA(2),Skin-Melanoma(2),Bone-Osteosarc(1),CNS-GBM(1),Eso-AdenoCA(1),Liver-HCC(1),Prost-AdenoCA(1),Stomach-AdenoCA(1)
FUSION_3	'PAPPA2	21	Prost-AdenoCA(9),SoftTissue-Liposarc(4),Liver-HCC(2),Biliary-AdenoCA(1),Bone-Osteosarc(1),Cervix-SCC(1),ColoRect-AdenoCA(1),Ovary-AdenoCA(1),Panc-AdenoCA(1)
FUSION_3	'PARD3B	21	Prost-AdenoCA(5),Eso-AdenoCA(4),Breast-AdenoCA(3),Head-SCC(2),Ovary-AdenoCA(2),Skin-Melanoma(2),Panc-AdenoCA(1),SoftTissue-Leiomyo(1),SoftTissue-Liposarc(1)
FUSION_3	'R3HDM2	21	CNS-GBM(6),SoftTissue-Liposarc(6),ColoRect-AdenoCA(2),Bone-Osteosarc(1),Breast-AdenoCA(1),Lung-SCC(1),Panc-AdenoCA(1),Prost-AdenoCA(1),Skin-Melanoma(1),Stomach-AdenoCA(1)
FUSION_3	'RP11-362K2.2	21	SoftTissue-Liposarc(11),CNS-GBM(7),Lung-SCC(1),Panc-AdenoCA(1),Skin-Melanoma(1)
FUSION_3	'SUPT3H	21	Breast-AdenoCA(4),ColoRect-AdenoCA(3),Panc-AdenoCA(3),Eso-AdenoCA(2),Ovary-AdenoCA(2),Prost-AdenoCA(2),SoftTissue-Liposarc(2),Bladder-TCC(1),Lung-AdenoCA(1),Skin-Melanoma(1)
FUSION_3	'ZNF536	21	Lung-AdenoCA(5),Panc-AdenoCA(3),Liver-HCC(2),Ovary-AdenoCA(2),Bladder-TCC(1),Bone-Osteosarc(1),Breast-AdenoCA(1),ColoRect-AdenoCA(1),Eso-AdenoCA(1),Lung-SCC(1),Skin-Melanoma(1),SoftTissue-Liposarc(1),Uterus-AdenoCA(1)
DISRUPTION	'AC067959.1	20	Prost-AdenoCA(5),Liver-HCC(4),Ovary-AdenoCA(3),Panc-AdenoCA(2),CNS-GBM(1),Eso-AdenoCA(1),Lung-AdenoCA(1),Lung-SCC(1),Skin-Melanoma(1),SoftTissue-Liposarc(1)
DISRUPTION	'AGBL1	20	Breast-AdenoCA(4),Bone-Osteosarc(3),Panc-AdenoCA(3),Eso-AdenoCA(2),Skin-Melanoma(2),Lung-AdenoCA(1),Lymph-BNHL(1),Ovary-AdenoCA(1),Prost-AdenoCA(1),SoftTissue-Leiomyo(1),Stomach-AdenoCA(1)
DISRUPTION	'AP000487.6	20	Breast-AdenoCA(5),Breast-LobularCA(3),Skin-Melanoma(3),Eso-AdenoCA(2),Head-SCC(2),Stomach-AdenoCA(2),ColoRect-AdenoCA(1),Liver-HCC(1),Lung-SCC(1)
DISRUPTION	'ARID2	20	Liver-HCC(3),Ovary-AdenoCA(3),Skin-Melanoma(3),Breast-AdenoCA(2),SoftTissue-Liposarc(2),Stomach-AdenoCA(2),Biliary-AdenoCA(1),Bladder-TCC(1),CNS-GBM(1),Panc-AdenoCA(1),Prost-AdenoCA(1)
DISRUPTION	'ASAP2	20	Prost-AdenoCA(7),Stomach-AdenoCA(3),Uterus-AdenoCA(2),Bone-Osteosarc(1),Breast-AdenoCA(1),CNS-Medullo(1),Eso-AdenoCA(1),Liver-HCC(1),Panc-AdenoCA(1),Panc-Endocrine(1),SoftTissue-Liposarc(1)
DISRUPTION	'BTBD11	20	Prost-AdenoCA(9),SoftTissue-Liposarc(3),Liver-HCC(2),Skin-Melanoma(2),Bladder-TCC(1),Eso-AdenoCA(1),Ovary-AdenoCA(1),SoftTissue-Leiomyo(1)
DISRUPTION	'CACHD1	20	Prost-AdenoCA(11),Breast-AdenoCA(3),Liver-HCC(2),Skin-Melanoma(2),Ovary-AdenoCA(1),Panc-AdenoCA(1)
DISRUPTION	'CACNA1A	20	Breast-AdenoCA(3),Liver-HCC(3),Eso-AdenoCA(2),Ovary-AdenoCA(2),Panc-AdenoCA(2),Uterus-AdenoCA(2),Bone-Osteosarc(1),Lung-AdenoCA(1),Lung-SCC(1),Prost-AdenoCA(1),Skin-Melanoma(1),SoftTissue-Liposarc(1)
DISRUPTION	'CACNA2D3	20	Prost-AdenoCA(5),Stomach-AdenoCA(3),Breast-AdenoCA(2),Biliary-AdenoCA(1),Bladder-TCC(1),ColoRect-AdenoCA(1),Head-SCC(1),Kidney-RCC(1),Lymph-CLL(1),Ovary-AdenoCA(1),Panc-AdenoCA(1),Skin-Melanoma(1),Uterus-AdenoCA(1)
DISRUPTION	'CDKN2A	20	Panc-AdenoCA(6),Eso-AdenoCA(3),Skin-Melanoma(2),Breast-AdenoCA(1),CNS-GBM(1),Kidney-RCC(1),Lung-AdenoCA(1),Lymph-BNHL(1),Panc-Endocrine(1),Prost-AdenoCA(1),SoftTissue-Liposarc(1),Stomach-AdenoCA(1)
DISRUPTION	'CLIC5	20	Prost-AdenoCA(10),Breast-AdenoCA(2),Liver-HCC(2),Biliary-AdenoCA(1),Panc-AdenoCA(1),Skin-Melanoma(1),SoftTissue-Leiomyo(1),SoftTissue-Liposarc(1),Stomach-AdenoCA(1)
DISRUPTION	'CNTN4	20	Ovary-AdenoCA(3),Panc-AdenoCA(3),Liver-HCC(2),Uterus-AdenoCA(2),Biliary-AdenoCA(1),Bone-Osteosarc(1),Breast-AdenoCA(1),Eso-AdenoCA(1),Lymph-BNHL(1),Panc-Endocrine(1),Prost-AdenoCA(1),Skin-Melanoma(1),SoftTissue-Liposarc(1),Stomach-AdenoCA(1)
DISRUPTION	'DGKB	20	Skin-Melanoma(5),Prost-AdenoCA(4),Bladder-TCC(2),Breast-AdenoCA(2),Liver-HCC(2),Biliary-AdenoCA(1),Eso-AdenoCA(1),Head-SCC(1),Lung-AdenoCA(1),Panc-AdenoCA(1)
DISRUPTION	'DNAH9	20	Bone-Osteosarc(3),Breast-AdenoCA(3),ColoRect-AdenoCA(2),Biliary-AdenoCA(1),Bladder-TCC(1),Bone-Benign(1),Breast-LobularCA(1),Liver-HCC(1),Lung-AdenoCA(1),Lung-SCC(1),Prost-AdenoCA(1),Skin-Melanoma(1),SoftTissue-Leiomyo(1),SoftTissue-Liposarc(1),Stomach-AdenoCA(1)
DISRUPTION	'DOCK1	20	Prost-AdenoCA(12),Eso-AdenoCA(2),Ovary-AdenoCA(2),Bladder-TCC(1),Bone-Osteosarc(1),Skin-Melanoma(1),Stomach-AdenoCA(1)
DISRUPTION	'EHBP1	20	Breast-AdenoCA(3),Eso-AdenoCA(3),Liver-HCC(2),Panc-AdenoCA(2),Prost-AdenoCA(2),Skin-Melanoma(2),Uterus-AdenoCA(2),Lung-SCC(1),Lymph-BNHL(1),Ovary-AdenoCA(1),SoftTissue-Leiomyo(1)
DISRUPTION	'ELMO1	20	Bladder-TCC(3),Breast-AdenoCA(3),Ovary-AdenoCA(3),Liver-HCC(2),Skin-Melanoma(2),Stomach-AdenoCA(2),Bone-Osteosarc(1),CNS-GBM(1),Lymph-BNHL(1),Panc-AdenoCA(1),Prost-AdenoCA(1)
DISRUPTION	'FMN1	20	Prost-AdenoCA(10),Breast-AdenoCA(2),Skin-Melanoma(2),Bone-Osteosarc(1),Liver-HCC(1),Lung-AdenoCA(1),Panc-AdenoCA(1),SoftTissue-Leiomyo(1),SoftTissue-Liposarc(1)
DISRUPTION	'HOOK3	20	Breast-AdenoCA(5),Prost-AdenoCA(3),Liver-HCC(2),Stomach-AdenoCA(2),Bone-Osteosarc(1),Breast-LobularCA(1),ColoRect-AdenoCA(1),Eso-AdenoCA(1),Lung-AdenoCA(1),Ovary-AdenoCA(1),Panc-AdenoCA(1),SoftTissue-Liposarc(1)
DISRUPTION	'KCTD1	20	Ovary-AdenoCA(6),Panc-AdenoCA(5),Breast-AdenoCA(3),Skin-Melanoma(2),Bone-Epith(1),Bone-Osteosarc(1),ColoRect-AdenoCA(1),Eso-AdenoCA(1)
DISRUPTION	'KIF13B	20	Prost-AdenoCA(5),Eso-AdenoCA(3),Panc-AdenoCA(3),SoftTissue-Liposarc(2),Breast-AdenoCA(1),Liver-HCC(1),Lung-AdenoCA(1),Lung-SCC(1),Lymph-BNHL(1),Lymph-CLL(1),Stomach-AdenoCA(1)
DISRUPTION	'L3MBTL4	20	Panc-AdenoCA(3),Breast-AdenoCA(2),Eso-AdenoCA(2),Head-SCC(2),Ovary-AdenoCA(2),Bone-Osteosarc(1),ColoRect-AdenoCA(1),Lung-AdenoCA(1),Lung-SCC(1),Panc-Endocrine(1),Prost-AdenoCA(1),SoftTissue-Leiomyo(1),SoftTissue-Liposarc(1),Stomach-AdenoCA(1)
DISRUPTION	'LINC00534	20	Liver-HCC(5),Breast-AdenoCA(4),Panc-AdenoCA(3),Lung-AdenoCA(2),Ovary-AdenoCA(2),Biliary-AdenoCA(1),Bone-Osteosarc(1),SoftTissue-Liposarc(1),Stomach-AdenoCA(1)
DISRUPTION	'LINC00535	20	Prost-AdenoCA(10),Ovary-AdenoCA(3),Breast-AdenoCA(2),Lung-AdenoCA(2),Liver-HCC(1),SoftTissue-Leiomyo(1),SoftTissue-Liposarc(1)
DISRUPTION	'LINC01090	20	Prost-AdenoCA(9),Ovary-AdenoCA(3),Bone-Osteosarc(2),Skin-Melanoma(2),Liver-HCC(1),Lung-SCC(1),Panc-AdenoCA(1),SoftTissue-Liposarc(1)
DISRUPTION	'LLNLF-65H9.1	20	Bone-Osteosarc(4),Ovary-AdenoCA(3),Panc-AdenoCA(3),Stomach-AdenoCA(3),Skin-Melanoma(2),Breast-AdenoCA(1),Eso-AdenoCA(1),Lung-AdenoCA(1),Lymph-BNHL(1),SoftTissue-Liposarc(1)
DISRUPTION	'MIR31HG	20	Panc-AdenoCA(8),CNS-GBM(2),Head-SCC(2),Biliary-AdenoCA(1),Breast-AdenoCA(1),Kidney-RCC(1),Liver-HCC(1),Lung-SCC(1),Panc-Endocrine(1),Skin-Melanoma(1),SoftTissue-Leiomyo(1)
DISRUPTION	'MYRFL	20	SoftTissue-Liposarc(13),Eso-AdenoCA(2),Bone-Osteosarc(1),CNS-GBM(1),Lung-AdenoCA(1),Skin-Melanoma(1),Stomach-AdenoCA(1)
DISRUPTION	'NEBL	20	Breast-AdenoCA(7),Ovary-AdenoCA(5),Prost-AdenoCA(2),Eso-AdenoCA(1),Liver-HCC(1),Lymph-BNHL(1),Panc-AdenoCA(1),Stomach-AdenoCA(1),Uterus-AdenoCA(1)
DISRUPTION	'NOL4	20	Panc-AdenoCA(5),Ovary-AdenoCA(4),Lung-SCC(3),Head-SCC(2),Lung-AdenoCA(2),Skin-Melanoma(2),Bone-Osteosarc(1),Liver-HCC(1)
DISRUPTION	'NTM	20	Breast-AdenoCA(4),Ovary-AdenoCA(4),Eso-AdenoCA(2),Liver-HCC(2),Bone-Osteosarc(1),CNS-Oligo(1),Kidney-RCC(1),Lung-AdenoCA(1),Lymph-BNHL(1),Panc-AdenoCA(1),Skin-Melanoma(1),Stomach-AdenoCA(1)
DISRUPTION	'PAK1	20	Skin-Melanoma(9),Breast-AdenoCA(3),Biliary-AdenoCA(1),Bladder-TCC(1),Bone-Osteosarc(1),Breast-LobularCA(1),Eso-AdenoCA(1),Head-SCC(1),Ovary-AdenoCA(1),Stomach-AdenoCA(1)
DISRUPTION	'PDS5B	20	Prost-AdenoCA(5),Stomach-AdenoCA(3),Breast-AdenoCA(2),Ovary-AdenoCA(2),Biliary-AdenoCA(1),Bone-Osteosarc(1),Liver-HCC(1),Panc-Endocrine(1),Skin-Melanoma(1),SoftTissue-Leiomyo(1),SoftTissue-Liposarc(1),Uterus-AdenoCA(1)
DISRUPTION	'PLEKHA6	20	Breast-AdenoCA(7),Liver-HCC(4),CNS-GBM(2),Prost-AdenoCA(2),Bone-Osteosarc(1),Lymph-BNHL(1),Ovary-AdenoCA(1),SoftTissue-Liposarc(1),Uterus-AdenoCA(1)
DISRUPTION	'PLXDC2	20	Breast-AdenoCA(3),Stomach-AdenoCA(3),Head-SCC(2),Liver-HCC(2),Ovary-AdenoCA(2),Panc-AdenoCA(2),ColoRect-AdenoCA(1),Kidney-RCC(1),Lung-SCC(1),Prost-AdenoCA(1),SoftTissue-Liposarc(1),Uterus-AdenoCA(1)
DISRUPTION	'RP11-13A1.3	20	SoftTissue-Liposarc(7),Liver-HCC(2),Bladder-TCC(1),Breast-AdenoCA(1),Breast-LobularCA(1),CNS-GBM(1),ColoRect-AdenoCA(1),Eso-AdenoCA(1),Lung-AdenoCA(1),Lung-SCC(1),Prost-AdenoCA(1),Skin-Melanoma(1),SoftTissue-Leiomyo(1)
DISRUPTION	'RP11-399D6.2	20	Panc-AdenoCA(6),Skin-Melanoma(3),Liver-HCC(2),Ovary-AdenoCA(2),Bone-Osteosarc(1),CNS-GBM(1),Eso-AdenoCA(1),Lymph-BNHL(1),Prost-AdenoCA(1),SoftTissue-Liposarc(1),Uterus-AdenoCA(1)
DISRUPTION	'RP11-449D8.5	20	Panc-AdenoCA(13),Eso-AdenoCA(2),Head-SCC(1),Liver-HCC(1),Skin-Melanoma(1),Stomach-AdenoCA(1),Uterus-AdenoCA(1)
DISRUPTION	'RP11-44K6.3	20	Prost-AdenoCA(8),Breast-AdenoCA(5),Liver-HCC(2),Lung-SCC(2),Head-SCC(1),Panc-AdenoCA(1),Thy-AdenoCA(1)
DISRUPTION	'RP11-586K2.1	20	Ovary-AdenoCA(4),Breast-AdenoCA(3),Lung-AdenoCA(3),Panc-AdenoCA(2),Prost-AdenoCA(2),Head-SCC(1),Lung-SCC(1),Lymph-BNHL(1),Skin-Melanoma(1),SoftTissue-Liposarc(1),Stomach-AdenoCA(1)
DISRUPTION	'RP11-624C23.1	20	Breast-AdenoCA(3),Lung-SCC(3),Prost-AdenoCA(3),Liver-HCC(2),Lymph-BNHL(2),Skin-Melanoma(2),Stomach-AdenoCA(2),CNS-Oligo(1),Eso-AdenoCA(1),Panc-AdenoCA(1)
DISRUPTION	'RPA3-AS1	20	Skin-Melanoma(4),Panc-AdenoCA(3),Eso-AdenoCA(2),Head-SCC(2),Lung-AdenoCA(2),SoftTissue-Liposarc(2),Breast-AdenoCA(1),ColoRect-AdenoCA(1),Lung-SCC(1),Ovary-AdenoCA(1),Prost-AdenoCA(1)
DISRUPTION	'SLC30A8	20	Breast-AdenoCA(6),Prost-AdenoCA(5),Panc-Endocrine(2),Head-SCC(1),Lung-AdenoCA(1),Lung-SCC(1),Ovary-AdenoCA(1),Panc-AdenoCA(1),SoftTissue-Liposarc(1),Stomach-AdenoCA(1)
DISRUPTION	'SLC8A1-AS1	20	Prost-AdenoCA(6),Breast-AdenoCA(4),Liver-HCC(2),Ovary-AdenoCA(2),Uterus-AdenoCA(2),Lung-SCC(1),Panc-AdenoCA(1),Skin-Melanoma(1),Stomach-AdenoCA(1)
DISRUPTION	'SND1	20	Bone-Osteosarc(2),Eso-AdenoCA(2),Ovary-AdenoCA(2),Panc-AdenoCA(2),Skin-Melanoma(2),SoftTissue-Liposarc(2),Stomach-AdenoCA(2),Bladder-TCC(1),Breast-AdenoCA(1),Head-SCC(1),Lung-AdenoCA(1),Prost-AdenoCA(1),Uterus-AdenoCA(1)
DISRUPTION	'SORCS3	20	Prost-AdenoCA(12),Breast-AdenoCA(3),Liver-HCC(1),Lung-SCC(1),Ovary-AdenoCA(1),Panc-AdenoCA(1),Uterus-AdenoCA(1)
DISRUPTION	'SPAG9	20	Breast-AdenoCA(4),Panc-AdenoCA(3),Stomach-AdenoCA(3),Uterus-AdenoCA(3),Eso-AdenoCA(2),Ovary-AdenoCA(2),SoftTissue-Liposarc(2),Liver-HCC(1)
DISRUPTION	'TBC1D22A	20	Prost-AdenoCA(7),Eso-AdenoCA(2),Liver-HCC(2),Biliary-AdenoCA(1),Bone-Osteosarc(1),CNS-GBM(1),Lymph-BNHL(1),Panc-AdenoCA(1),Panc-Endocrine(1),Skin-Melanoma(1),SoftTissue-Liposarc(1),Stomach-AdenoCA(1)
DISRUPTION	'TBL1XR1	20	Ovary-AdenoCA(7),Breast-AdenoCA(4),Liver-HCC(2),Panc-AdenoCA(2),Prost-AdenoCA(2),Head-SCC(1),Lung-SCC(1),Uterus-AdenoCA(1)
DISRUPTION	'TRPS1	20	Breast-AdenoCA(6),Bone-Osteosarc(2),Liver-HCC(2),Lymph-BNHL(2),Stomach-AdenoCA(2),Kidney-ChRCC(1),Lung-AdenoCA(1),Ovary-AdenoCA(1),Panc-AdenoCA(1),Prost-AdenoCA(1),SoftTissue-Liposarc(1)
DISRUPTION	'VWA3B	20	Prost-AdenoCA(9),Breast-AdenoCA(5),Eso-AdenoCA(1),Head-SCC(1),Lung-SCC(1),Ovary-AdenoCA(1),Panc-Endocrine(1),Uterus-AdenoCA(1)
DISRUPTION	'WIPF2	20	Breast-AdenoCA(8),Eso-AdenoCA(3),Bone-Osteosarc(1),Breast-LobularCA(1),Head-SCC(1),Liver-HCC(1),Ovary-AdenoCA(1),Panc-AdenoCA(1),Prost-AdenoCA(1),Stomach-AdenoCA(1),Uterus-AdenoCA(1)
DISRUPTION	'YAP1	20	Lung-SCC(3),Ovary-AdenoCA(3),Breast-AdenoCA(2),Head-SCC(2),Panc-AdenoCA(2),Stomach-AdenoCA(2),Bone-Osteosarc(1),Cervix-SCC(1),Eso-AdenoCA(1),Skin-Melanoma(1),SoftTissue-Liposarc(1),Uterus-AdenoCA(1)
DISRUPTION	'ZNRF3	20	Eso-AdenoCA(3),Ovary-AdenoCA(3),Panc-AdenoCA(3),Breast-AdenoCA(2),Prost-AdenoCA(2),Skin-Melanoma(2),Bone-Osteosarc(1),Lung-AdenoCA(1),SoftTissue-Liposarc(1),Stomach-AdenoCA(1),Uterus-AdenoCA(1)
DISRUPTION	'ZPBP	20	Prost-AdenoCA(10),Breast-AdenoCA(5),CNS-GBM(3),Panc-AdenoCA(1),SoftTissue-Leiomyo(1)
EXON_SKIP	'LRBA	20	Liver-HCC(4),ColoRect-AdenoCA(3),Stomach-AdenoCA(3),Eso-AdenoCA(2),Biliary-AdenoCA(1),Bladder-TCC(1),Bone-Osteosarc(1),Breast-AdenoCA(1),Head-SCC(1),Ovary-AdenoCA(1),Panc-Endocrine(1),Skin-Melanoma(1)
EXON_SKIP	'TBL1XR1	20	Breast-AdenoCA(4),Ovary-AdenoCA(4),Uterus-AdenoCA(3),Prost-AdenoCA(2),Bladder-TCC(1),Eso-AdenoCA(1),Liver-HCC(1),Lung-SCC(1),Lymph-BNHL(1),SoftTissue-Liposarc(1),Stomach-AdenoCA(1)
ITD	'NAALADL2	20	Eso-AdenoCA(4),Ovary-AdenoCA(4),Lung-AdenoCA(2),Panc-AdenoCA(2),Uterus-AdenoCA(2),Breast-AdenoCA(1),CNS-GBM(1),Kidney-ChRCC(1),Liver-HCC(1),Prost-AdenoCA(1),Stomach-AdenoCA(1)
DYSFUNCTIONAL_FUSION	'PARK2:PACRG	20	Panc-AdenoCA(5),ColoRect-AdenoCA(4),Eso-AdenoCA(4),Stomach-AdenoCA(4),Kidney-RCC(1),Lung-SCC(1),Lymph-BNHL(1)
FUSION_5	'BCL2L14	20	Breast-AdenoCA(9),Prost-AdenoCA(2),Bladder-TCC(1),Bone-Osteosarc(1),ColoRect-AdenoCA(1),Eso-AdenoCA(1),Lung-AdenoCA(1),Ovary-AdenoCA(1),Panc-AdenoCA(1),Stomach-AdenoCA(1),Uterus-AdenoCA(1)
FUSION_5	'CTB-12O2.1	20	Liver-HCC(17),Stomach-AdenoCA(2),ColoRect-AdenoCA(1)
FUSION_5	'CTNND2	20	Liver-HCC(4),Lung-AdenoCA(3),Bone-Osteosarc(2),Ovary-AdenoCA(2),Prost-AdenoCA(2),Skin-Melanoma(2),Breast-AdenoCA(1),CNS-Medullo(1),Eso-AdenoCA(1),Lung-SCC(1),Panc-AdenoCA(1)
FUSION_5	'DSCAM	20	Kidney-RCC(5),Panc-AdenoCA(4),Breast-AdenoCA(3),ColoRect-AdenoCA(2),Breast-LobularCA(1),CNS-Medullo(1),Cervix-SCC(1),Lung-AdenoCA(1),Skin-Melanoma(1),Stomach-AdenoCA(1)
FUSION_5	'DYNC2H1	20	Head-SCC(4),Skin-Melanoma(4),Bone-Osteosarc(3),Liver-HCC(2),Bone-Epith(1),CNS-GBM(1),Lung-AdenoCA(1),Lung-SCC(1),Panc-AdenoCA(1),Prost-AdenoCA(1),SoftTissue-Liposarc(1)
FUSION_5	'GNG7	20	Skin-Melanoma(13),Breast-AdenoCA(2),CNS-GBM(1),Ovary-AdenoCA(1),Prost-AdenoCA(1),SoftTissue-Liposarc(1),Uterus-AdenoCA(1)
FUSION_5	'LSAMP	20	Ovary-AdenoCA(6),Prost-AdenoCA(4),Breast-AdenoCA(2),Panc-AdenoCA(2),Bone-Osteosarc(1),Eso-AdenoCA(1),Lung-SCC(1),Lymph-BNHL(1),SoftTissue-Leiomyo(1),Uterus-AdenoCA(1)
FUSION_5	'NCKAP5	20	Prost-AdenoCA(10),Panc-AdenoCA(3),Breast-AdenoCA(2),Lung-SCC(2),Kidney-RCC(1),Skin-Melanoma(1),SoftTissue-Liposarc(1)
FUSION_5	'NPAS3	20	Ovary-AdenoCA(7),Breast-AdenoCA(5),Liver-HCC(2),Skin-Melanoma(2),Biliary-AdenoCA(1),CNS-GBM(1),Panc-AdenoCA(1),Prost-AdenoCA(1)
FUSION_5	'NRG1	20	Breast-AdenoCA(4),Ovary-AdenoCA(4),Prost-AdenoCA(4),Lung-SCC(3),Skin-Melanoma(2),Eso-AdenoCA(1),Liver-HCC(1),SoftTissue-Liposarc(1)
FUSION_5	'PPP6R3	20	Eso-AdenoCA(4),Skin-Melanoma(3),Lung-SCC(2),Panc-AdenoCA(2),Prost-AdenoCA(2),Biliary-AdenoCA(1),Bladder-TCC(1),Breast-AdenoCA(1),Head-SCC(1),Liver-HCC(1),Panc-Endocrine(1),Uterus-AdenoCA(1)
FUSION_5	'PTEN	20	Prost-AdenoCA(15),Eso-AdenoCA(2),Breast-AdenoCA(1),Ovary-AdenoCA(1),Skin-Melanoma(1)
FUSION_5	'PTPRM	20	Breast-AdenoCA(3),Eso-AdenoCA(3),Panc-AdenoCA(3),SoftTissue-Liposarc(3),Head-SCC(2),Ovary-AdenoCA(2),Skin-Melanoma(2),Liver-HCC(1),Stomach-AdenoCA(1)
FUSION_5	'ROBO1	20	Breast-AdenoCA(4),Skin-Melanoma(3),Eso-AdenoCA(2),Kidney-RCC(2),SoftTissue-Liposarc(2),Stomach-AdenoCA(2),Bladder-TCC(1),CNS-Medullo(1),Lung-AdenoCA(1),Ovary-AdenoCA(1),Prost-AdenoCA(1)
FUSION_5	'RP11-753H16.5	20	SoftTissue-Liposarc(8),Ovary-AdenoCA(6),Skin-Melanoma(3),Breast-AdenoCA(2),Head-SCC(1)
FUSION_5	'SLC8A1-AS1	20	Prost-AdenoCA(16),Breast-AdenoCA(1),Ovary-AdenoCA(1),Skin-Melanoma(1),Stomach-AdenoCA(1)
FUSION_5	'SPAG16	20	Panc-AdenoCA(5),Prost-AdenoCA(4),Eso-AdenoCA(2),Kidney-RCC(2),Breast-AdenoCA(1),CNS-Oligo(1),Head-SCC(1),Liver-HCC(1),Ovary-AdenoCA(1),Stomach-AdenoCA(1),Uterus-AdenoCA(1)
FUSION_5	'TTC28	20	Liver-HCC(7),Skin-Melanoma(6),Ovary-AdenoCA(3),Breast-AdenoCA(1),Head-SCC(1),Panc-AdenoCA(1),SoftTissue-Liposarc(1)
FUSION_3	'CACNA1A	20	Skin-Melanoma(7),Breast-AdenoCA(4),Bone-Osteosarc(2),Eso-AdenoCA(2),Lung-AdenoCA(1),Lymph-BNHL(1),Ovary-AdenoCA(1),Prost-AdenoCA(1),Uterus-AdenoCA(1)
FUSION_3	'CTNNA3	20	Breast-AdenoCA(8),Stomach-AdenoCA(4),Panc-AdenoCA(2),Bone-Osteosarc(1),Eso-AdenoCA(1),Liver-HCC(1),Lung-SCC(1),Lymph-BNHL(1),SoftTissue-Leiomyo(1)
FUSION_3	'DLGAP1	20	Panc-AdenoCA(8),Liver-HCC(2),Prost-AdenoCA(2),Breast-AdenoCA(1),Eso-AdenoCA(1),Kidney-ChRCC(1),Lung-SCC(1),Skin-Melanoma(1),SoftTissue-Liposarc(1),Stomach-AdenoCA(1),Uterus-AdenoCA(1)
FUSION_3	'EXOC4	20	Skin-Melanoma(8),SoftTissue-Liposarc(7),Ovary-AdenoCA(2),Lung-AdenoCA(1),Prost-AdenoCA(1),Uterus-AdenoCA(1)
FUSION_3	'FNDC3B	20	Eso-AdenoCA(4),Prost-AdenoCA(4),Liver-HCC(3),Ovary-AdenoCA(3),Breast-AdenoCA(2),Lung-SCC(1),Panc-AdenoCA(1),Skin-Melanoma(1),Uterus-AdenoCA(1)
FUSION_3	'FRS2	20	SoftTissue-Liposarc(16),Bone-Osteosarc(1),Breast-AdenoCA(1),Liver-HCC(1),Skin-Melanoma(1)
FUSION_3	'IGHJ6	20	Lymph-BNHL(12),Lymph-CLL(8)
FUSION_3	'PPP6R3	20	Eso-AdenoCA(5),Liver-HCC(4),Skin-Melanoma(4),Bladder-TCC(2),Lung-SCC(2),Breast-AdenoCA(1),CNS-GBM(1),Head-SCC(1)
FUSION_3	'ST18	20	Prost-AdenoCA(10),Liver-HCC(4),Bone-Osteosarc(2),Uterus-AdenoCA(2),Breast-AdenoCA(1),Skin-Melanoma(1)
FUSION_3	'THADA	20	Eso-AdenoCA(5),Prost-AdenoCA(4),Breast-AdenoCA(3),Panc-AdenoCA(3),ColoRect-AdenoCA(1),Liver-HCC(1),Ovary-AdenoCA(1),Stomach-AdenoCA(1),Thy-AdenoCA(1)
FUSION_3	'UNC5D	20	Breast-AdenoCA(6),Eso-AdenoCA(3),Liver-HCC(3),Prost-AdenoCA(2),ColoRect-AdenoCA(1),Head-SCC(1),Lung-AdenoCA(1),Lung-SCC(1),Panc-AdenoCA(1),Uterus-AdenoCA(1)
FUSION_3	'USP32	20	Breast-AdenoCA(8),Bladder-TCC(3),Skin-Melanoma(2),Bone-Osteosarc(1),ColoRect-AdenoCA(1),Liver-HCC(1),Lung-SCC(1),Panc-AdenoCA(1),Stomach-AdenoCA(1),Uterus-AdenoCA(1)
FUSION_3	'WWOX	20	Panc-AdenoCA(3),Stomach-AdenoCA(3),Breast-AdenoCA(2),Eso-AdenoCA(2),Ovary-AdenoCA(2),Prost-AdenoCA(2),Bladder-TCC(1),Bone-Epith(1),ColoRect-AdenoCA(1),Liver-HCC(1),Skin-Melanoma(1),SoftTissue-Leiomyo(1)
DISRUPTION	'AC018359.1	19	Breast-AdenoCA(4),Ovary-AdenoCA(4),Eso-AdenoCA(2),Biliary-AdenoCA(1),Bone-Osteosarc(1),Kidney-ChRCC(1),Liver-HCC(1),Lymph-BNHL(1),Skin-Melanoma(1),SoftTissue-Liposarc(1),Stomach-AdenoCA(1),Uterus-AdenoCA(1)
DISRUPTION	'ACSS3	19	SoftTissue-Liposarc(6),Bone-Osteosarc(2),Breast-AdenoCA(2),Panc-AdenoCA(2),Skin-Melanoma(2),Stomach-AdenoCA(2),Biliary-AdenoCA(1),Liver-HCC(1),Ovary-AdenoCA(1)
DISRUPTION	'ADAMTS12	19	Ovary-AdenoCA(3),Prost-AdenoCA(3),Bone-Osteosarc(2),Breast-AdenoCA(2),CNS-Oligo(1),Eso-AdenoCA(1),Kidney-ChRCC(1),Liver-HCC(1),Lymph-BNHL(1),Panc-AdenoCA(1),Skin-Melanoma(1),SoftTissue-Leiomyo(1),Uterus-AdenoCA(1)
DISRUPTION	'AKAP6	19	Liver-HCC(4),Breast-AdenoCA(3),Ovary-AdenoCA(3),Skin-Melanoma(2),Uterus-AdenoCA(2),Eso-AdenoCA(1),Head-SCC(1),Lung-AdenoCA(1),Panc-AdenoCA(1),Stomach-AdenoCA(1)
DISRUPTION	'ANO1	19	Skin-Melanoma(5),Breast-AdenoCA(4),Head-SCC(2),Liver-HCC(2),Panc-AdenoCA(2),Ovary-AdenoCA(1),Panc-Endocrine(1),SoftTissue-Liposarc(1),Uterus-AdenoCA(1)
DISRUPTION	'AP001255.2	19	Prost-AdenoCA(11),Lung-AdenoCA(2),ColoRect-AdenoCA(1),Eso-AdenoCA(1),Lymph-CLL(1),Ovary-AdenoCA(1),Panc-AdenoCA(1),SoftTissue-Liposarc(1)
DISRUPTION	'ARID4B	19	Eso-AdenoCA(6),Breast-AdenoCA(4),Ovary-AdenoCA(2),Stomach-AdenoCA(2),Bone-Osteosarc(1),CNS-GBM(1),Liver-HCC(1),Prost-AdenoCA(1),Skin-Melanoma(1)
DISRUPTION	'ASH1L	19	Liver-HCC(8),Breast-AdenoCA(2),Eso-AdenoCA(2),Ovary-AdenoCA(2),Prost-AdenoCA(2),Panc-Endocrine(1),Stomach-AdenoCA(1),Uterus-AdenoCA(1)
DISRUPTION	'ATAD1	19	Prost-AdenoCA(12),Breast-LobularCA(1),CNS-GBM(1),CNS-Medullo(1),Liver-HCC(1),Panc-Endocrine(1),Skin-Melanoma(1),Stomach-AdenoCA(1)
DISRUPTION	'AZIN1	19	Prost-AdenoCA(12),Liver-HCC(3),Biliary-AdenoCA(1),Ovary-AdenoCA(1),Panc-AdenoCA(1),Stomach-AdenoCA(1)
DISRUPTION	'BBX	19	Prost-AdenoCA(8),Breast-AdenoCA(3),Ovary-AdenoCA(3),Bone-Osteosarc(1),CNS-Medullo(1),ColoRect-AdenoCA(1),Lung-SCC(1),Lymph-BNHL(1)
DISRUPTION	'BEST3	19	SoftTissue-Liposarc(10),Breast-AdenoCA(2),Ovary-AdenoCA(2),Prost-AdenoCA(2),Bone-Osteosarc(1),CNS-GBM(1),Stomach-AdenoCA(1)
DISRUPTION	'CACNA2D1	19	Ovary-AdenoCA(4),Stomach-AdenoCA(3),Skin-Melanoma(2),Bone-Osteosarc(1),Breast-AdenoCA(1),CNS-GBM(1),CNS-Medullo(1),ColoRect-AdenoCA(1),Eso-AdenoCA(1),Liver-HCC(1),Lung-SCC(1),Lymph-BNHL(1),Panc-AdenoCA(1)
DISRUPTION	'CLPB	19	Ovary-AdenoCA(5),Breast-AdenoCA(4),Prost-AdenoCA(2),Eso-AdenoCA(1),Head-SCC(1),Lung-SCC(1),Panc-AdenoCA(1),Panc-Endocrine(1),Skin-Melanoma(1),SoftTissue-Liposarc(1),Uterus-AdenoCA(1)
DISRUPTION	'CSMD2	19	Breast-AdenoCA(4),Ovary-AdenoCA(4),Liver-HCC(3),Biliary-AdenoCA(1),ColoRect-AdenoCA(1),Kidney-RCC(1),Lymph-BNHL(1),Panc-AdenoCA(1),Skin-Melanoma(1),Stomach-AdenoCA(1),Uterus-AdenoCA(1)
DISRUPTION	'CTD-2337A12.1	19	Prost-AdenoCA(5),Breast-AdenoCA(2),Liver-HCC(2),SoftTissue-Liposarc(2),Stomach-AdenoCA(2),Biliary-AdenoCA(1),Bladder-TCC(1),Kidney-ChRCC(1),Lung-AdenoCA(1),Lymph-BNHL(1),Panc-Endocrine(1)
DISRUPTION	'CTD-3006G17.2	19	Lung-SCC(3),Ovary-AdenoCA(3),Bone-Osteosarc(2),Breast-AdenoCA(2),Kidney-RCC(2),Lymph-BNHL(2),Liver-HCC(1),Lung-AdenoCA(1),Panc-AdenoCA(1),Prost-AdenoCA(1),Skin-Melanoma(1)
DISRUPTION	'DACH1	19	Breast-AdenoCA(5),Eso-AdenoCA(3),Bladder-TCC(2),Breast-LobularCA(2),Prost-AdenoCA(2),CNS-Medullo(1),ColoRect-AdenoCA(1),Lung-SCC(1),Ovary-AdenoCA(1),Stomach-AdenoCA(1)
DISRUPTION	'DIS3L2	19	Panc-AdenoCA(4),Prost-AdenoCA(3),Eso-AdenoCA(2),Stomach-AdenoCA(2),Bladder-TCC(1),Breast-AdenoCA(1),CNS-Oligo(1),ColoRect-AdenoCA(1),Liver-HCC(1),Skin-Melanoma(1),SoftTissue-Leiomyo(1),Uterus-AdenoCA(1)
DISRUPTION	'DNAH5	19	Bone-Osteosarc(3),Ovary-AdenoCA(3),Breast-AdenoCA(2),Lung-AdenoCA(2),Skin-Melanoma(2),SoftTissue-Liposarc(2),Head-SCC(1),Liver-HCC(1),Lung-SCC(1),Panc-AdenoCA(1),Prost-AdenoCA(1)
DISRUPTION	'DTNA	19	Panc-AdenoCA(7),Ovary-AdenoCA(3),Lung-SCC(2),SoftTissue-Leiomyo(2),Bladder-TCC(1),Liver-HCC(1),Lung-AdenoCA(1),Skin-Melanoma(1),SoftTissue-Liposarc(1)
DISRUPTION	'EGLN3	19	Breast-AdenoCA(4),Liver-HCC(4),Panc-AdenoCA(2),Skin-Melanoma(2),Biliary-AdenoCA(1),CNS-Medullo(1),Lung-AdenoCA(1),Prost-AdenoCA(1),SoftTissue-Liposarc(1),Stomach-AdenoCA(1),Uterus-AdenoCA(1)
DISRUPTION	'ENOX1	19	Breast-AdenoCA(5),Panc-AdenoCA(3),Bone-Osteosarc(2),Eso-AdenoCA(2),Lymph-BNHL(2),Ovary-AdenoCA(2),Prost-AdenoCA(2),Uterus-AdenoCA(1)
DISRUPTION	'EPHA3	19	Breast-AdenoCA(3),Ovary-AdenoCA(3),Panc-AdenoCA(3),Kidney-RCC(2),Lung-SCC(2),Skin-Melanoma(2),Eso-AdenoCA(1),Lymph-BNHL(1),Prost-AdenoCA(1),Stomach-AdenoCA(1)
DISRUPTION	'FAM168A	19	Skin-Melanoma(8),Breast-AdenoCA(4),Ovary-AdenoCA(3),Panc-AdenoCA(2),Prost-AdenoCA(1),Stomach-AdenoCA(1)
DISRUPTION	'GALNT13	19	Prost-AdenoCA(6),Breast-AdenoCA(3),Panc-AdenoCA(3),Skin-Melanoma(2),CNS-Medullo(1),Eso-AdenoCA(1),Head-SCC(1),Ovary-AdenoCA(1),Stomach-AdenoCA(1)
DISRUPTION	'GPATCH2	19	Prost-AdenoCA(9),Breast-AdenoCA(3),Uterus-AdenoCA(2),CNS-GBM(1),Eso-AdenoCA(1),Liver-HCC(1),Panc-AdenoCA(1),SoftTissue-Liposarc(1)
DISRUPTION	'GRK5	19	Prost-AdenoCA(11),CNS-GBM(2),Eso-AdenoCA(2),Liver-HCC(1),Lymph-BNHL(1),Panc-Endocrine(1),Stomach-AdenoCA(1)
DISRUPTION	'GRM1	19	Breast-AdenoCA(3),Liver-HCC(3),Panc-AdenoCA(3),Head-SCC(2),Ovary-AdenoCA(2),Bladder-TCC(1),Bone-Osteosarc(1),CNS-Medullo(1),Eso-AdenoCA(1),Skin-Melanoma(1),SoftTissue-Liposarc(1)
DISRUPTION	'HDAC9	19	Breast-AdenoCA(4),Panc-AdenoCA(3),Prost-AdenoCA(2),Skin-Melanoma(2),Stomach-AdenoCA(2),Bladder-TCC(1),Head-SCC(1),Liver-HCC(1),Lung-AdenoCA(1),Ovary-AdenoCA(1),Uterus-AdenoCA(1)
DISRUPTION	'HUS1	19	Prost-AdenoCA(10),Ovary-AdenoCA(2),Biliary-AdenoCA(1),Bone-Osteosarc(1),Eso-AdenoCA(1),Liver-HCC(1),Panc-AdenoCA(1),Skin-Melanoma(1),Uterus-AdenoCA(1)
DISRUPTION	'IGHJ4	19	Lymph-CLL(12),Lymph-BNHL(7)
DISRUPTION	'IL7	19	Prost-AdenoCA(10),Breast-AdenoCA(2),Skin-Melanoma(2),ColoRect-AdenoCA(1),Liver-HCC(1),Lung-AdenoCA(1),Ovary-AdenoCA(1),Panc-AdenoCA(1)
DISRUPTION	'JMJD1C	19	Breast-AdenoCA(4),Prost-AdenoCA(3),Stomach-AdenoCA(3),Bladder-TCC(1),Bone-Osteosarc(1),CNS-GBM(1),CNS-Medullo(1),Eso-AdenoCA(1),Kidney-RCC(1),Lymph-BNHL(1),Ovary-AdenoCA(1),Uterus-AdenoCA(1)
DISRUPTION	'KCNC2	19	SoftTissue-Liposarc(4),Eso-AdenoCA(3),Bone-Osteosarc(2),Prost-AdenoCA(2),Breast-AdenoCA(1),CNS-Medullo(1),CNS-Oligo(1),Kidney-RCC(1),Lymph-BNHL(1),Ovary-AdenoCA(1),Panc-AdenoCA(1),Skin-Melanoma(1)
DISRUPTION	'KCNS3	19	Breast-AdenoCA(5),Prost-AdenoCA(5),Panc-AdenoCA(3),Breast-LobularCA(1),CNS-Medullo(1),ColoRect-AdenoCA(1),Head-SCC(1),Skin-Melanoma(1),SoftTissue-Liposarc(1)
DISRUPTION	'KIF6	19	Breast-AdenoCA(3),Liver-HCC(3),Ovary-AdenoCA(3),Skin-Melanoma(2),Bone-Osteosarc(1),ColoRect-AdenoCA(1),Eso-AdenoCA(1),Panc-AdenoCA(1),Prost-AdenoCA(1),SoftTissue-Leiomyo(1),Stomach-AdenoCA(1),Uterus-AdenoCA(1)
DISRUPTION	'LINC00842	19	Prost-AdenoCA(10),Breast-AdenoCA(3),Eso-AdenoCA(2),Lung-AdenoCA(1),Ovary-AdenoCA(1),Panc-AdenoCA(1),Skin-Melanoma(1)
DISRUPTION	'LINC01122	19	Prost-AdenoCA(5),Lung-SCC(4),Breast-AdenoCA(2),Skin-Melanoma(2),Uterus-AdenoCA(2),Bone-Osteosarc(1),Liver-HCC(1),Lymph-CLL(1),Panc-AdenoCA(1)
DISRUPTION	'LRBA	19	Breast-AdenoCA(4),Ovary-AdenoCA(4),Eso-AdenoCA(2),CNS-GBM(1),ColoRect-AdenoCA(1),Liver-HCC(1),Panc-AdenoCA(1),Prost-AdenoCA(1),Skin-Melanoma(1),SoftTissue-Leiomyo(1),SoftTissue-Liposarc(1),Stomach-AdenoCA(1)
DISRUPTION	'MAP2K4	19	Prost-AdenoCA(6),Panc-AdenoCA(5),Liver-HCC(3),Biliary-AdenoCA(2),Breast-LobularCA(1),CNS-Medullo(1),Skin-Melanoma(1)
DISRUPTION	'MYC	19	Lymph-BNHL(12),Prost-AdenoCA(3),Breast-AdenoCA(2),CNS-Medullo(1),Eso-AdenoCA(1)
DISRUPTION	'MYH10	19	Liver-HCC(4),Prost-AdenoCA(3),Bone-Osteosarc(2),Breast-AdenoCA(2),Skin-Melanoma(2),Lung-SCC(1),Panc-AdenoCA(1),SoftTissue-Leiomyo(1),SoftTissue-Liposarc(1),Stomach-AdenoCA(1),Uterus-AdenoCA(1)
DISRUPTION	'MYO5B	19	Prost-AdenoCA(8),Breast-AdenoCA(2),Liver-HCC(2),Bone-Osteosarc(1),CNS-GBM(1),Head-SCC(1),Lung-AdenoCA(1),Lung-SCC(1),Panc-AdenoCA(1),Stomach-AdenoCA(1)
DISRUPTION	'NCALD	19	Breast-AdenoCA(3),Ovary-AdenoCA(3),Panc-AdenoCA(2),Prost-AdenoCA(2),Skin-Melanoma(2),Bone-Osteosarc(1),ColoRect-AdenoCA(1),Eso-AdenoCA(1),Kidney-ChRCC(1),Liver-HCC(1),SoftTissue-Liposarc(1),Uterus-AdenoCA(1)
DISRUPTION	'NCEH1	19	Breast-AdenoCA(6),Prost-AdenoCA(5),Liver-HCC(2),Cervix-SCC(1),Lung-SCC(1),Ovary-AdenoCA(1),Panc-AdenoCA(1),SoftTissue-Leiomyo(1),Stomach-AdenoCA(1)
DISRUPTION	'NEK11	19	Prost-AdenoCA(12),Breast-AdenoCA(3),Kidney-RCC(1),Liver-HCC(1),Lung-SCC(1),Lymph-BNHL(1)
DISRUPTION	'OSBPL10	19	Panc-AdenoCA(4),Prost-AdenoCA(4),Bone-Osteosarc(2),Breast-AdenoCA(2),Ovary-AdenoCA(2),Eso-AdenoCA(1),Kidney-ChRCC(1),Liver-HCC(1),Lung-AdenoCA(1),SoftTissue-Liposarc(1)
DISRUPTION	'PDE4B	19	Breast-AdenoCA(9),Skin-Melanoma(4),Prost-AdenoCA(2),Biliary-AdenoCA(1),Bladder-TCC(1),Ovary-AdenoCA(1),SoftTissue-Liposarc(1)
DISRUPTION	'PDE4DIP	19	Breast-AdenoCA(5),Lymph-BNHL(3),Skin-Melanoma(3),Bone-Benign(1),Liver-HCC(1),Lung-SCC(1),Panc-AdenoCA(1),Panc-Endocrine(1),Prost-AdenoCA(1),SoftTissue-Liposarc(1),Stomach-AdenoCA(1)
DISRUPTION	'PHF3	19	Ovary-AdenoCA(4),Skin-Melanoma(4),Breast-AdenoCA(3),Liver-HCC(3),Panc-AdenoCA(2),Head-SCC(1),Prost-AdenoCA(1),Stomach-AdenoCA(1)
DISRUPTION	'PTCHD4	19	Breast-AdenoCA(3),Eso-AdenoCA(2),Liver-HCC(2),Panc-AdenoCA(2),Skin-Melanoma(2),SoftTissue-Liposarc(2),Biliary-AdenoCA(1),Bone-Benign(1),CNS-GBM(1),Ovary-AdenoCA(1),Prost-AdenoCA(1),Stomach-AdenoCA(1)
DISRUPTION	'PTPN14	19	Breast-AdenoCA(6),CNS-GBM(2),Ovary-AdenoCA(2),Prost-AdenoCA(2),Bladder-TCC(1),Eso-AdenoCA(1),Head-SCC(1),Liver-HCC(1),Lung-AdenoCA(1),Lung-SCC(1),Uterus-AdenoCA(1)
DISRUPTION	'RALGAPA2	19	Ovary-AdenoCA(6),Panc-AdenoCA(5),Breast-AdenoCA(2),Liver-HCC(2),Bone-Osteosarc(1),CNS-Medullo(1),Lung-AdenoCA(1),Prost-AdenoCA(1)
DISRUPTION	'ROCK1	19	Panc-AdenoCA(5),Breast-AdenoCA(2),Eso-AdenoCA(2),Ovary-AdenoCA(2),Skin-Melanoma(2),Bone-Osteosarc(1),CNS-Medullo(1),Liver-HCC(1),Lung-AdenoCA(1),SoftTissue-Liposarc(1),Stomach-AdenoCA(1)
DISRUPTION	'RP11-115J23.1	19	Breast-AdenoCA(5),Eso-AdenoCA(3),Ovary-AdenoCA(3),Prost-AdenoCA(3),Biliary-AdenoCA(1),Bone-Osteosarc(1),Lymph-BNHL(1),Skin-Melanoma(1),Stomach-AdenoCA(1)
DISRUPTION	'RP11-150C16.1	19	CNS-GBM(4),SoftTissue-Liposarc(4),Breast-AdenoCA(2),Panc-AdenoCA(2),Skin-Melanoma(2),Stomach-AdenoCA(2),Bone-Osteosarc(1),Ovary-AdenoCA(1),Prost-AdenoCA(1)
DISRUPTION	'RP11-23D24.2	19	Breast-AdenoCA(4),Panc-AdenoCA(3),Lung-SCC(2),Ovary-AdenoCA(2),Stomach-AdenoCA(2),Biliary-AdenoCA(1),CNS-GBM(1),Eso-AdenoCA(1),Prost-AdenoCA(1),SoftTissue-Leiomyo(1),Uterus-AdenoCA(1)
DISRUPTION	'RP11-307N16.6	19	Prost-AdenoCA(5),Breast-AdenoCA(4),Ovary-AdenoCA(3),Bone-Osteosarc(2),Liver-HCC(2),Biliary-AdenoCA(1),Eso-AdenoCA(1),Lymph-BNHL(1)
DISRUPTION	'RP11-33N16.3	19	Prost-AdenoCA(5),Panc-AdenoCA(4),Skin-Melanoma(3),Liver-HCC(2),Bone-Osteosarc(1),Breast-AdenoCA(1),CNS-Medullo(1),Lymph-BNHL(1),Stomach-AdenoCA(1)
DISRUPTION	'RP11-37B2.1	19	Prost-AdenoCA(4),Eso-AdenoCA(3),Ovary-AdenoCA(3),ColoRect-AdenoCA(2),Lung-SCC(2),Uterus-AdenoCA(2),Kidney-RCC(1),Skin-Melanoma(1),Stomach-AdenoCA(1)
DISRUPTION	'RP11-594N15.2	19	Prost-AdenoCA(12),Biliary-AdenoCA(1),Breast-AdenoCA(1),Breast-LobularCA(1),ColoRect-AdenoCA(1),Liver-HCC(1),Lymph-BNHL(1),Ovary-AdenoCA(1)
DISRUPTION	'RP11-702H23.4	19	Breast-AdenoCA(4),Skin-Melanoma(4),Ovary-AdenoCA(2),Panc-AdenoCA(2),Breast-LobularCA(1),Eso-AdenoCA(1),Liver-HCC(1),Lung-AdenoCA(1),Lung-SCC(1),Stomach-AdenoCA(1),Uterus-AdenoCA(1)
DISRUPTION	'RP11-708B6.2	19	Prost-AdenoCA(7),ColoRect-AdenoCA(2),Panc-AdenoCA(2),Skin-Melanoma(2),Stomach-AdenoCA(2),Head-SCC(1),Kidney-RCC(1),Ovary-AdenoCA(1),Uterus-AdenoCA(1)
DISRUPTION	'RP11-81H3.2	19	SoftTissue-Liposarc(8),Bone-Osteosarc(4),Breast-AdenoCA(2),Eso-AdenoCA(2),Bladder-TCC(1),Lung-SCC(1),Uterus-AdenoCA(1)
DISRUPTION	'RP4-723E3.1	19	Breast-AdenoCA(5),Panc-AdenoCA(3),Prost-AdenoCA(3),Skin-Melanoma(3),SoftTissue-Liposarc(2),Bone-Osteosarc(1),CNS-Medullo(1),Stomach-AdenoCA(1)
DISRUPTION	'SEMA3A	19	Ovary-AdenoCA(6),CNS-GBM(2),ColoRect-AdenoCA(2),Liver-HCC(2),Bone-Osteosarc(1),Breast-AdenoCA(1),Eso-AdenoCA(1),Panc-AdenoCA(1),Prost-AdenoCA(1),Skin-Melanoma(1),Uterus-AdenoCA(1)
DISRUPTION	'SLC39A11	19	Breast-AdenoCA(7),Liver-HCC(3),Prost-AdenoCA(3),SoftTissue-Liposarc(2),Bone-Osteosarc(1),Panc-AdenoCA(1),Skin-Melanoma(1),Uterus-AdenoCA(1)
DISRUPTION	'SYNE1	19	Breast-AdenoCA(6),Panc-AdenoCA(2),Skin-Melanoma(2),Uterus-AdenoCA(2),Bone-Osteosarc(1),Eso-AdenoCA(1),Liver-HCC(1),Lung-SCC(1),Prost-AdenoCA(1),SoftTissue-Liposarc(1),Stomach-AdenoCA(1)
DISRUPTION	'TANC1	19	Prost-AdenoCA(7),Breast-AdenoCA(3),Bone-Osteosarc(2),Ovary-AdenoCA(2),Eso-AdenoCA(1),Liver-HCC(1),Panc-AdenoCA(1),Skin-Melanoma(1),SoftTissue-Leiomyo(1)
DISRUPTION	'TMTC1	19	Prost-AdenoCA(7),Panc-AdenoCA(4),Skin-Melanoma(2),Bone-Osteosarc(1),Eso-AdenoCA(1),Head-SCC(1),Lung-SCC(1),SoftTissue-Liposarc(1),Stomach-AdenoCA(1)
DISRUPTION	'TNR	19	Breast-AdenoCA(5),Ovary-AdenoCA(3),Biliary-AdenoCA(2),Bone-Osteosarc(1),Cervix-SCC(1),Liver-HCC(1),Lung-AdenoCA(1),Lung-SCC(1),Skin-Melanoma(1),SoftTissue-Liposarc(1),Stomach-AdenoCA(1),Uterus-AdenoCA(1)
DISRUPTION	'TNRC6B	19	Skin-Melanoma(4),Breast-AdenoCA(3),Panc-AdenoCA(3),Bladder-TCC(2),Ovary-AdenoCA(2),SoftTissue-Liposarc(2),Liver-HCC(1),Panc-Endocrine(1),Prost-AdenoCA(1)
DISRUPTION	'TSFM	19	SoftTissue-Liposarc(10),CNS-GBM(4),Ovary-AdenoCA(2),Breast-AdenoCA(1),Prost-AdenoCA(1),Skin-Melanoma(1)
DISRUPTION	'URI1	19	Stomach-AdenoCA(4),Eso-AdenoCA(3),Ovary-AdenoCA(3),Panc-AdenoCA(3),Breast-AdenoCA(1),Liver-HCC(1),Lung-SCC(1),Skin-Melanoma(1),SoftTissue-Liposarc(1),Uterus-AdenoCA(1)
DISRUPTION	'USP15	19	Breast-AdenoCA(3),Prost-AdenoCA(3),SoftTissue-Liposarc(3),Bone-Osteosarc(2),Eso-AdenoCA(2),Ovary-AdenoCA(2),Panc-AdenoCA(2),Lung-AdenoCA(1),Skin-Melanoma(1)
DISRUPTION	'WDPCP	19	Ovary-AdenoCA(3),Breast-AdenoCA(2),Lymph-BNHL(2),Myeloid-MPN(2),Skin-Melanoma(2),Stomach-AdenoCA(2),Breast-LobularCA(1),ColoRect-AdenoCA(1),Eso-AdenoCA(1),Liver-HCC(1),Lung-SCC(1),Uterus-AdenoCA(1)
DISRUPTION	'ZBTB7C	19	Lung-SCC(3),Breast-AdenoCA(2),Ovary-AdenoCA(2),Skin-Melanoma(2),SoftTissue-Liposarc(2),Bone-Epith(1),CNS-Medullo(1),ColoRect-AdenoCA(1),Eso-AdenoCA(1),Panc-AdenoCA(1),Prost-AdenoCA(1),SoftTissue-Leiomyo(1),Stomach-AdenoCA(1)
EXON_SKIP	'EGFR	19	CNS-GBM(14),Biliary-AdenoCA(1),Eso-AdenoCA(1),Liver-HCC(1),Skin-Melanoma(1),Uterus-AdenoCA(1)
EXON_SKIP	'GPC6	19	Liver-HCC(8),Panc-AdenoCA(3),CNS-Medullo(2),Bone-Osteosarc(1),Head-SCC(1),Lung-SCC(1),Lymph-BNHL(1),Ovary-AdenoCA(1),Uterus-AdenoCA(1)
EXON_SKIP	'RABGAP1L	19	Breast-AdenoCA(3),Eso-AdenoCA(3),Liver-HCC(3),Panc-AdenoCA(3),ColoRect-AdenoCA(2),Stomach-AdenoCA(2),Head-SCC(1),Lymph-BNHL(1),Ovary-AdenoCA(1)
ITD	'PTPRD	19	Ovary-AdenoCA(4),Prost-AdenoCA(4),Liver-HCC(2),Lung-AdenoCA(2),Panc-AdenoCA(2),Breast-AdenoCA(1),Head-SCC(1),Kidney-RCC(1),Panc-Endocrine(1),Stomach-AdenoCA(1)
FUSION_5	'ANKRD11	19	Uterus-AdenoCA(3),Lymph-BNHL(2),Ovary-AdenoCA(2),Bone-Osteosarc(1),Breast-AdenoCA(1),Eso-AdenoCA(1),Kidney-RCC(1),Liver-HCC(1),Lung-AdenoCA(1),Lung-SCC(1),Lymph-CLL(1),Panc-AdenoCA(1),Prost-AdenoCA(1),Skin-Melanoma(1),SoftTissue-Leiomyo(1)
FUSION_5	'COL14A1	19	Ovary-AdenoCA(7),Breast-AdenoCA(5),Eso-AdenoCA(2),Panc-AdenoCA(2),SoftTissue-Leiomyo(1),Stomach-AdenoCA(1),Uterus-AdenoCA(1)
FUSION_5	'CPT1A	19	Panc-AdenoCA(5),Skin-Melanoma(5),Liver-HCC(4),Breast-AdenoCA(2),Breast-LobularCA(1),Eso-AdenoCA(1),Ovary-AdenoCA(1)
FUSION_5	'CTNNA2	19	Prost-AdenoCA(10),Lung-SCC(3),Skin-Melanoma(3),Bone-Osteosarc(1),Ovary-AdenoCA(1),Panc-AdenoCA(1)
FUSION_5	'DISC1FP1	19	Breast-AdenoCA(7),SoftTissue-Liposarc(3),Prost-AdenoCA(2),Skin-Melanoma(2),Breast-LobularCA(1),Kidney-RCC(1),Liver-HCC(1),Ovary-AdenoCA(1),Stomach-AdenoCA(1)
FUSION_5	'EGFR	19	CNS-GBM(11),Eso-AdenoCA(3),Breast-AdenoCA(2),Head-SCC(1),Liver-HCC(1),Lung-AdenoCA(1)
FUSION_5	'EIF2B5	19	Breast-AdenoCA(5),Eso-AdenoCA(3),Lung-SCC(3),CNS-GBM(2),Biliary-AdenoCA(1),Liver-HCC(1),Ovary-AdenoCA(1),Prost-AdenoCA(1),Stomach-AdenoCA(1),Uterus-AdenoCA(1)
FUSION_5	'FOCAD	19	Panc-AdenoCA(5),Bladder-TCC(3),Liver-HCC(3),Skin-Melanoma(3),Breast-AdenoCA(2),Eso-AdenoCA(2),Lymph-BNHL(1)
FUSION_5	'GAB2	19	Breast-AdenoCA(7),Skin-Melanoma(7),Ovary-AdenoCA(3),ColoRect-AdenoCA(1),Head-SCC(1)
FUSION_5	'LRRC4C	19	Bone-Osteosarc(7),Breast-AdenoCA(4),Prost-AdenoCA(3),Eso-AdenoCA(1),Head-SCC(1),Lung-AdenoCA(1),Ovary-AdenoCA(1),SoftTissue-Leiomyo(1)
FUSION_5	'MAGI2	19	Eso-AdenoCA(5),Ovary-AdenoCA(3),Panc-AdenoCA(3),Bone-Osteosarc(1),CNS-GBM(1),Cervix-SCC(1),Liver-HCC(1),Lung-SCC(1),Lymph-BNHL(1),Prost-AdenoCA(1),SoftTissue-Liposarc(1)
FUSION_5	'RAB3IP	19	SoftTissue-Liposarc(14),Bone-Osteosarc(1),Eso-AdenoCA(1),Panc-AdenoCA(1),Skin-Melanoma(1),Stomach-AdenoCA(1)
FUSION_5	'RABGAP1L	19	Bone-Osteosarc(4),SoftTissue-Liposarc(4),Liver-HCC(3),Breast-AdenoCA(2),Lung-SCC(2),Biliary-AdenoCA(1),ColoRect-AdenoCA(1),Head-SCC(1),Panc-AdenoCA(1)
FUSION_5	'RP11-13A1.3	19	SoftTissue-Liposarc(13),Bone-Osteosarc(2),ColoRect-AdenoCA(2),Breast-AdenoCA(1),Skin-Melanoma(1)
FUSION_5	'SGCZ	19	Breast-AdenoCA(3),Stomach-AdenoCA(3),Panc-AdenoCA(2),Prost-AdenoCA(2),Skin-Melanoma(2),SoftTissue-Liposarc(2),Bone-Osteosarc(1),Eso-AdenoCA(1),Liver-HCC(1),Ovary-AdenoCA(1),Uterus-AdenoCA(1)
FUSION_5	'SGMS1	19	Prost-AdenoCA(13),Bone-Osteosarc(1),Breast-AdenoCA(1),Head-SCC(1),Liver-HCC(1),SoftTissue-Leiomyo(1),Stomach-AdenoCA(1)
FUSION_5	'SMYD3	19	Lung-SCC(3),Skin-Melanoma(3),Bone-Osteosarc(2),CNS-GBM(2),SoftTissue-Liposarc(2),Biliary-AdenoCA(1),Breast-AdenoCA(1),Lung-AdenoCA(1),Panc-AdenoCA(1),Prost-AdenoCA(1),SoftTissue-Leiomyo(1),Uterus-AdenoCA(1)
FUSION_5	'SNTG1	19	ColoRect-AdenoCA(3),Skin-Melanoma(3),Liver-HCC(2),Lung-AdenoCA(2),Panc-AdenoCA(2),Biliary-AdenoCA(1),Breast-AdenoCA(1),Breast-LobularCA(1),CNS-GBM(1),Eso-AdenoCA(1),Kidney-ChRCC(1),Lymph-BNHL(1)
FUSION_5	'TPH2	19	SoftTissue-Liposarc(9),Bone-Osteosarc(3),Eso-AdenoCA(2),Skin-Melanoma(2),Stomach-AdenoCA(2),Lung-SCC(1)
FUSION_5	'VTI1A	19	Prost-AdenoCA(10),Liver-HCC(3),Bone-Osteosarc(1),Breast-AdenoCA(1),ColoRect-AdenoCA(1),Lung-SCC(1),Panc-AdenoCA(1),SoftTissue-Liposarc(1)
FUSION_3	'AC096559.1	19	Prost-AdenoCA(14),Ovary-AdenoCA(2),Breast-AdenoCA(1),Panc-AdenoCA(1),Stomach-AdenoCA(1)
FUSION_3	'AGO2	19	Prost-AdenoCA(5),Eso-AdenoCA(4),Breast-AdenoCA(3),Skin-Melanoma(2),Bladder-TCC(1),ColoRect-AdenoCA(1),Head-SCC(1),Liver-HCC(1),Stomach-AdenoCA(1)
FUSION_3	'ASH1L	19	Liver-HCC(4),Uterus-AdenoCA(3),Biliary-AdenoCA(2),Breast-AdenoCA(2),Prost-AdenoCA(2),Bone-Osteosarc(1),Eso-AdenoCA(1),Lymph-BNHL(1),Panc-AdenoCA(1),Skin-Melanoma(1),SoftTissue-Liposarc(1)
FUSION_3	'BRD4	19	Breast-AdenoCA(6),Ovary-AdenoCA(4),Panc-AdenoCA(4),Lung-SCC(2),ColoRect-AdenoCA(1),Stomach-AdenoCA(1),Uterus-AdenoCA(1)
FUSION_3	'DTNB	19	Prost-AdenoCA(15),Panc-AdenoCA(2),SoftTissue-Liposarc(2)
FUSION_3	'FIP1L1	19	CNS-GBM(6),Liver-HCC(5),Skin-Melanoma(3),Uterus-AdenoCA(2),Breast-AdenoCA(1),Ovary-AdenoCA(1),Panc-AdenoCA(1)
FUSION_3	'HDAC9	19	Skin-Melanoma(4),Prost-AdenoCA(3),Liver-HCC(2),Stomach-AdenoCA(2),Thy-AdenoCA(2),Bladder-TCC(1),Bone-Osteosarc(1),Breast-AdenoCA(1),Head-SCC(1),Kidney-RCC(1),Lung-SCC(1)
FUSION_3	'ITPR2	19	Liver-HCC(3),Skin-Melanoma(3),Lymph-BNHL(2),Panc-AdenoCA(2),Prost-AdenoCA(2),SoftTissue-Liposarc(2),Breast-AdenoCA(1),Lung-AdenoCA(1),Ovary-AdenoCA(1),Stomach-AdenoCA(1),Uterus-AdenoCA(1)
FUSION_3	'PDLIM5	19	Prost-AdenoCA(10),Liver-HCC(5),Uterus-AdenoCA(2),Eso-AdenoCA(1),Head-SCC(1)
FUSION_3	'PRKG1	19	Prost-AdenoCA(12),Head-SCC(2),CNS-Medullo(1),Liver-HCC(1),Lung-SCC(1),Panc-AdenoCA(1),Stomach-AdenoCA(1)
FUSION_3	'ROBO1	19	Breast-AdenoCA(6),Bone-Osteosarc(4),Skin-Melanoma(4),Prost-AdenoCA(2),SoftTissue-Liposarc(2),Bladder-TCC(1)
FUSION_3	'SGCZ	19	Eso-AdenoCA(3),Liver-HCC(3),Panc-AdenoCA(3),Breast-AdenoCA(2),Prost-AdenoCA(2),Lung-AdenoCA(1),Ovary-AdenoCA(1),Skin-Melanoma(1),SoftTissue-Liposarc(1),Stomach-AdenoCA(1),Uterus-AdenoCA(1)
FUSION_3	'SIPA1L3	19	Ovary-AdenoCA(4),Uterus-AdenoCA(3),Biliary-AdenoCA(2),Breast-AdenoCA(2),Panc-AdenoCA(2),Bone-Osteosarc(1),Eso-AdenoCA(1),Liver-HCC(1),Lung-SCC(1),Skin-Melanoma(1),Stomach-AdenoCA(1)
FUSION_3	'SND1	19	Prost-AdenoCA(6),Skin-Melanoma(3),SoftTissue-Liposarc(3),Bone-Osteosarc(1),Breast-AdenoCA(1),ColoRect-AdenoCA(1),Liver-HCC(1),Panc-AdenoCA(1),SoftTissue-Leiomyo(1),Uterus-AdenoCA(1)
FUSION_3	'SNTG1	19	Breast-AdenoCA(2),Liver-HCC(2),Lung-AdenoCA(2),Ovary-AdenoCA(2),Panc-AdenoCA(2),Prost-AdenoCA(2),Skin-Melanoma(2),Bone-Osteosarc(1),Breast-LobularCA(1),CNS-GBM(1),ColoRect-AdenoCA(1),Stomach-AdenoCA(1)
FUSION_3	'SUMF1	19	Breast-AdenoCA(4),Eso-AdenoCA(3),Stomach-AdenoCA(3),Kidney-RCC(2),Ovary-AdenoCA(2),Panc-AdenoCA(2),Liver-HCC(1),Lung-SCC(1),Skin-Melanoma(1)
FUSION_3	'VPS13B	19	Breast-AdenoCA(5),Liver-HCC(3),Panc-AdenoCA(3),Head-SCC(2),SoftTissue-Liposarc(2),Eso-AdenoCA(1),Prost-AdenoCA(1),Skin-Melanoma(1),Stomach-AdenoCA(1)
FUSION_3	'ZNF702P	19	Prost-AdenoCA(15),Breast-AdenoCA(2),Ovary-AdenoCA(1),Uterus-AdenoCA(1)
DISRUPTION	'ABCC4	18	Breast-AdenoCA(4),Prost-AdenoCA(4),Ovary-AdenoCA(3),Liver-HCC(2),Bladder-TCC(1),Eso-AdenoCA(1),Lung-SCC(1),Panc-AdenoCA(1),Uterus-AdenoCA(1)
DISRUPTION	'ABLIM1	18	Prost-AdenoCA(10),Breast-AdenoCA(3),Panc-AdenoCA(2),Bladder-TCC(1),Liver-HCC(1),Stomach-AdenoCA(1)
DISRUPTION	'ADAMTSL1	18	Skin-Melanoma(6),Liver-HCC(3),Biliary-AdenoCA(2),CNS-GBM(2),Ovary-AdenoCA(2),Uterus-AdenoCA(2),Breast-AdenoCA(1)
DISRUPTION	'AEBP2	18	Ovary-AdenoCA(4),Breast-AdenoCA(3),Liver-HCC(3),Prost-AdenoCA(3),Lung-SCC(2),Eso-AdenoCA(1),Panc-AdenoCA(1),Skin-Melanoma(1)
DISRUPTION	'BCAS1	18	Breast-AdenoCA(5),Stomach-AdenoCA(4),CNS-GBM(1),CNS-Medullo(1),Cervix-SCC(1),Liver-HCC(1),Lung-SCC(1),Ovary-AdenoCA(1),Prost-AdenoCA(1),Skin-Melanoma(1),Uterus-AdenoCA(1)
DISRUPTION	'CASC11	18	CNS-Medullo(5),Breast-AdenoCA(4),Prost-AdenoCA(3),Panc-AdenoCA(2),Uterus-AdenoCA(2),Ovary-AdenoCA(1),SoftTissue-Liposarc(1)
DISRUPTION	'CASC15	18	Breast-AdenoCA(4),Ovary-AdenoCA(3),Skin-Melanoma(3),Bladder-TCC(2),CNS-GBM(1),Eso-AdenoCA(1),Liver-HCC(1),Panc-AdenoCA(1),SoftTissue-Leiomyo(1),Uterus-AdenoCA(1)
DISRUPTION	'CECR2	18	Panc-AdenoCA(5),Skin-Melanoma(3),Breast-AdenoCA(2),Uterus-AdenoCA(2),CNS-GBM(1),Eso-AdenoCA(1),Liver-HCC(1),Lung-SCC(1),Ovary-AdenoCA(1),Panc-Endocrine(1)
DISRUPTION	'CLVS1	18	Breast-AdenoCA(6),Liver-HCC(2),Panc-AdenoCA(2),Prost-AdenoCA(2),Bone-Osteosarc(1),Kidney-RCC(1),Ovary-AdenoCA(1),Skin-Melanoma(1),Stomach-AdenoCA(1),Uterus-AdenoCA(1)
DISRUPTION	'CNOT2	18	SoftTissue-Liposarc(10),Bone-Osteosarc(2),Skin-Melanoma(2),Stomach-AdenoCA(2),Breast-AdenoCA(1),Ovary-AdenoCA(1)
DISRUPTION	'CTC-459F4.3	18	Bone-Osteosarc(4),Ovary-AdenoCA(3),Stomach-AdenoCA(3),Skin-Melanoma(2),Breast-AdenoCA(1),Eso-AdenoCA(1),Lung-AdenoCA(1),Lymph-BNHL(1),Panc-AdenoCA(1),SoftTissue-Liposarc(1)
DISRUPTION	'DCDC1	18	Prost-AdenoCA(5),Eso-AdenoCA(3),Head-SCC(2),Ovary-AdenoCA(2),Bladder-TCC(1),Bone-Osteosarc(1),Breast-AdenoCA(1),Kidney-RCC(1),Panc-AdenoCA(1),SoftTissue-Liposarc(1)
DISRUPTION	'DLC1	18	Ovary-AdenoCA(4),Breast-AdenoCA(3),Panc-AdenoCA(3),Liver-HCC(2),Stomach-AdenoCA(2),Biliary-AdenoCA(1),Eso-AdenoCA(1),Lymph-BNHL(1),Prost-AdenoCA(1)
DISRUPTION	'EGFLAM	18	Bone-Osteosarc(5),Prost-AdenoCA(5),Ovary-AdenoCA(2),SoftTissue-Liposarc(2),Stomach-AdenoCA(2),CNS-Medullo(1),Eso-AdenoCA(1)
DISRUPTION	'EPHA5	18	Breast-AdenoCA(6),Ovary-AdenoCA(3),Panc-AdenoCA(3),Prost-AdenoCA(2),Bladder-TCC(1),Eso-AdenoCA(1),Liver-HCC(1),Stomach-AdenoCA(1)
DISRUPTION	'FAM135B	18	Breast-AdenoCA(6),Liver-HCC(4),Lung-SCC(2),Ovary-AdenoCA(2),Bladder-TCC(1),Bone-Osteosarc(1),Eso-AdenoCA(1),Stomach-AdenoCA(1)
DISRUPTION	'FAT3	18	Breast-AdenoCA(4),Skin-Melanoma(4),Eso-AdenoCA(2),Prost-AdenoCA(2),Bone-Osteosarc(1),Head-SCC(1),Liver-HCC(1),Lung-SCC(1),Ovary-AdenoCA(1),Stomach-AdenoCA(1)
DISRUPTION	'GOPC	18	Prost-AdenoCA(9),Breast-AdenoCA(2),Liver-HCC(2),Bone-Osteosarc(1),Eso-AdenoCA(1),Panc-AdenoCA(1),SoftTissue-Liposarc(1),Uterus-AdenoCA(1)
DISRUPTION	'HCRTR2	18	Prost-AdenoCA(11),Breast-AdenoCA(2),Liver-HCC(2),Biliary-AdenoCA(1),Bone-Benign(1),Panc-AdenoCA(1)
DISRUPTION	'KHDRBS3	18	Breast-AdenoCA(2),Liver-HCC(2),Lung-AdenoCA(2),Ovary-AdenoCA(2),Skin-Melanoma(2),Bladder-TCC(1),Bone-Osteosarc(1),CNS-GBM(1),ColoRect-AdenoCA(1),Eso-AdenoCA(1),Panc-AdenoCA(1),Prost-AdenoCA(1),Uterus-AdenoCA(1)
DISRUPTION	'LINC00882	18	Ovary-AdenoCA(6),Prost-AdenoCA(3),CNS-Medullo(2),Skin-Melanoma(2),Breast-AdenoCA(1),Kidney-RCC(1),Liver-HCC(1),Lymph-BNHL(1),Panc-Endocrine(1)
DISRUPTION	'MAP2	18	Prost-AdenoCA(12),ColoRect-AdenoCA(1),Kidney-RCC(1),Lymph-BNHL(1),Panc-AdenoCA(1),Panc-Endocrine(1),SoftTissue-Leiomyo(1)
DISRUPTION	'MARCH1	18	Breast-AdenoCA(3),Prost-AdenoCA(3),Skin-Melanoma(3),Bladder-TCC(1),Bone-Osteosarc(1),Head-SCC(1),Liver-HCC(1),Lung-AdenoCA(1),Ovary-AdenoCA(1),Panc-AdenoCA(1),SoftTissue-Liposarc(1),Stomach-AdenoCA(1)
DISRUPTION	'MICU1	18	Breast-AdenoCA(5),CNS-GBM(2),Eso-AdenoCA(2),Liver-HCC(2),Lung-SCC(2),Ovary-AdenoCA(2),Bone-Epith(1),Stomach-AdenoCA(1),Uterus-AdenoCA(1)
DISRUPTION	'MITF	18	Skin-Melanoma(7),Prost-AdenoCA(3),Ovary-AdenoCA(2),Panc-AdenoCA(2),Breast-AdenoCA(1),Head-SCC(1),Kidney-RCC(1),Lung-AdenoCA(1)
DISRUPTION	'MPDZ	18	Skin-Melanoma(3),Biliary-AdenoCA(2),Breast-AdenoCA(2),Ovary-AdenoCA(2),SoftTissue-Liposarc(2),Stomach-AdenoCA(2),Bladder-TCC(1),CNS-GBM(1),Eso-AdenoCA(1),Panc-AdenoCA(1),Uterus-AdenoCA(1)
DISRUPTION	'MPP7	18	Prost-AdenoCA(10),Ovary-AdenoCA(4),Bone-Osteosarc(1),CNS-GBM(1),Eso-AdenoCA(1),Skin-Melanoma(1)
DISRUPTION	'MTSS1	18	Liver-HCC(3),Lung-SCC(3),Breast-AdenoCA(2),Panc-AdenoCA(2),Prost-AdenoCA(2),Bladder-TCC(1),Bone-Osteosarc(1),ColoRect-AdenoCA(1),Eso-AdenoCA(1),SoftTissue-Liposarc(1),Stomach-AdenoCA(1)
DISRUPTION	'NAV3	18	SoftTissue-Liposarc(8),Panc-AdenoCA(2),Biliary-AdenoCA(1),Bone-Osteosarc(1),Breast-LobularCA(1),Eso-AdenoCA(1),Lung-AdenoCA(1),Ovary-AdenoCA(1),Skin-Melanoma(1),Uterus-AdenoCA(1)
DISRUPTION	'NDUFAF6	18	Prost-AdenoCA(6),Breast-AdenoCA(3),Liver-HCC(3),CNS-GBM(1),Eso-AdenoCA(1),Lung-AdenoCA(1),Ovary-AdenoCA(1),Panc-AdenoCA(1),Uterus-AdenoCA(1)
DISRUPTION	'NOS1AP	18	Breast-AdenoCA(6),SoftTissue-Liposarc(4),Liver-HCC(2),Ovary-AdenoCA(2),Biliary-AdenoCA(1),Bladder-TCC(1),Bone-Osteosarc(1),Uterus-AdenoCA(1)
DISRUPTION	'NUP107	18	SoftTissue-Liposarc(10),CNS-GBM(4),Bone-Osteosarc(1),Eso-AdenoCA(1),Skin-Melanoma(1),Stomach-AdenoCA(1)
DISRUPTION	'OFCC1	18	Skin-Melanoma(5),Breast-AdenoCA(4),Ovary-AdenoCA(3),Panc-AdenoCA(2),Eso-AdenoCA(1),Liver-HCC(1),Panc-Endocrine(1),SoftTissue-Liposarc(1)
DISRUPTION	'POLB	18	Prost-AdenoCA(8),Breast-AdenoCA(3),Liver-HCC(2),Ovary-AdenoCA(2),Lung-AdenoCA(1),Panc-AdenoCA(1),Skin-Melanoma(1)
DISRUPTION	'PPFIBP1	18	Ovary-AdenoCA(3),Breast-AdenoCA(2),Liver-HCC(2),Panc-AdenoCA(2),Bladder-TCC(1),CNS-GBM(1),ColoRect-AdenoCA(1),Eso-AdenoCA(1),Head-SCC(1),Prost-AdenoCA(1),Skin-Melanoma(1),Stomach-AdenoCA(1),Uterus-AdenoCA(1)
DISRUPTION	'PPM1H	18	SoftTissue-Liposarc(4),Panc-AdenoCA(3),Breast-AdenoCA(2),CNS-GBM(2),Ovary-AdenoCA(2),Bone-Osteosarc(1),CNS-Oligo(1),Eso-AdenoCA(1),Liver-HCC(1),Prost-AdenoCA(1)
DISRUPTION	'PREX1	18	Prost-AdenoCA(8),Breast-AdenoCA(3),ColoRect-AdenoCA(1),Eso-AdenoCA(1),Liver-HCC(1),Ovary-AdenoCA(1),Panc-AdenoCA(1),Skin-Melanoma(1),Stomach-AdenoCA(1)
DISRUPTION	'PREX2	18	Prost-AdenoCA(5),Breast-AdenoCA(2),Liver-HCC(2),Bladder-TCC(1),Lung-AdenoCA(1),Lung-SCC(1),Ovary-AdenoCA(1),Panc-AdenoCA(1),Skin-Melanoma(1),SoftTissue-Liposarc(1),Stomach-AdenoCA(1),Uterus-AdenoCA(1)
DISRUPTION	'PTPRB	18	SoftTissue-Liposarc(7),Bone-Osteosarc(2),Breast-AdenoCA(2),Lung-AdenoCA(2),Skin-Melanoma(2),Bladder-TCC(1),Liver-HCC(1),Stomach-AdenoCA(1)
DISRUPTION	'RP1-34H18.1	18	Prost-AdenoCA(4),SoftTissue-Liposarc(4),Lung-SCC(2),Skin-Melanoma(2),Biliary-AdenoCA(1),Bladder-TCC(1),Bone-Osteosarc(1),ColoRect-AdenoCA(1),Lymph-BNHL(1),Stomach-AdenoCA(1)
DISRUPTION	'RP11-125O18.1	18	Prost-AdenoCA(11),Stomach-AdenoCA(3),Ovary-AdenoCA(2),Breast-AdenoCA(1),Eso-AdenoCA(1)
DISRUPTION	'RP11-150O12.1	18	Breast-AdenoCA(6),Liver-HCC(3),Prost-AdenoCA(2),Bladder-TCC(1),Eso-AdenoCA(1),Lung-SCC(1),Ovary-AdenoCA(1),Panc-AdenoCA(1),Skin-Melanoma(1),Stomach-AdenoCA(1)
DISRUPTION	'RP11-260O18.1	18	Breast-AdenoCA(4),Prost-AdenoCA(3),Eso-AdenoCA(2),Kidney-RCC(2),Ovary-AdenoCA(2),Bladder-TCC(1),Liver-HCC(1),Lung-SCC(1),Panc-AdenoCA(1),Stomach-AdenoCA(1)
DISRUPTION	'RP11-368L12.1	18	Panc-AdenoCA(4),Eso-AdenoCA(3),Prost-AdenoCA(3),Bladder-TCC(1),Bone-Epith(1),CNS-Medullo(1),ColoRect-AdenoCA(1),Head-SCC(1),Kidney-RCC(1),Liver-HCC(1),Ovary-AdenoCA(1)
DISRUPTION	'RP11-400N13.1	18	Breast-AdenoCA(6),Skin-Melanoma(3),Bone-Osteosarc(2),Panc-AdenoCA(2),Biliary-AdenoCA(1),Bladder-TCC(1),Eso-AdenoCA(1),Lymph-BNHL(1),Panc-Endocrine(1)
DISRUPTION	'RP11-556I14.1	18	Prost-AdenoCA(14),Lung-AdenoCA(2),Bone-Benign(1),Panc-AdenoCA(1)
DISRUPTION	'RP11-659O3.1	18	Prost-AdenoCA(6),Panc-AdenoCA(4),ColoRect-AdenoCA(2),Liver-HCC(2),Bone-Osteosarc(1),Breast-AdenoCA(1),CNS-GBM(1),Ovary-AdenoCA(1)
DISRUPTION	'RPS11P6	18	Breast-AdenoCA(4),Bone-Osteosarc(3),Ovary-AdenoCA(3),SoftTissue-Liposarc(3),Prost-AdenoCA(2),CNS-GBM(1),Lung-AdenoCA(1),Panc-AdenoCA(1)
DISRUPTION	'SGCD	18	Prost-AdenoCA(6),Liver-HCC(3),Ovary-AdenoCA(3),Skin-Melanoma(2),Bone-Osteosarc(1),Panc-AdenoCA(1),SoftTissue-Leiomyo(1),Stomach-AdenoCA(1)
DISRUPTION	'SLC35F3	18	Breast-AdenoCA(4),Prost-AdenoCA(3),Liver-HCC(2),Panc-AdenoCA(2),SoftTissue-Liposarc(2),Ovary-AdenoCA(1),Panc-Endocrine(1),Skin-Melanoma(1),Stomach-AdenoCA(1),Uterus-AdenoCA(1)
DISRUPTION	'SLCO2B1	18	Skin-Melanoma(7),Breast-AdenoCA(3),Liver-HCC(2),Breast-LobularCA(1),CNS-GBM(1),Eso-AdenoCA(1),Panc-Endocrine(1),SoftTissue-Liposarc(1),Stomach-AdenoCA(1)
DISRUPTION	'SNTB1	18	Breast-AdenoCA(6),Liver-HCC(2),Panc-AdenoCA(2),Biliary-AdenoCA(1),Bone-Osteosarc(1),Eso-AdenoCA(1),Kidney-ChRCC(1),Lung-SCC(1),Ovary-AdenoCA(1),Prost-AdenoCA(1),Stomach-AdenoCA(1)
DISRUPTION	'SPATA13	18	Prost-AdenoCA(5),Breast-AdenoCA(3),Ovary-AdenoCA(3),Bone-Osteosarc(2),Liver-HCC(2),Biliary-AdenoCA(1),Eso-AdenoCA(1),Lymph-BNHL(1)
DISRUPTION	'TBC1D1	18	Breast-AdenoCA(4),Eso-AdenoCA(4),Liver-HCC(4),Ovary-AdenoCA(2),Bone-Osteosarc(1),Lymph-BNHL(1),Panc-AdenoCA(1),Prost-AdenoCA(1)
DISRUPTION	'THSD4	18	Breast-AdenoCA(3),Ovary-AdenoCA(3),Uterus-AdenoCA(3),CNS-GBM(2),Bone-Osteosarc(1),Breast-LobularCA(1),ColoRect-AdenoCA(1),Liver-HCC(1),Lung-AdenoCA(1),Prost-AdenoCA(1),Skin-Melanoma(1)
DISRUPTION	'TIAM1	18	Breast-AdenoCA(5),Panc-AdenoCA(3),Kidney-RCC(2),Ovary-AdenoCA(2),Bone-Osteosarc(1),Breast-LobularCA(1),ColoRect-AdenoCA(1),SoftTissue-Leiomyo(1),Stomach-AdenoCA(1),Uterus-AdenoCA(1)
DISRUPTION	'VRK2	18	Liver-HCC(4),Ovary-AdenoCA(4),Lymph-BNHL(3),Eso-AdenoCA(2),Breast-AdenoCA(1),Cervix-SCC(1),Lung-SCC(1),Lymph-CLL(1),Prost-AdenoCA(1)
DISRUPTION	'VTI1A	18	Prost-AdenoCA(5),Eso-AdenoCA(2),Liver-HCC(2),Panc-AdenoCA(2),Biliary-AdenoCA(1),Breast-AdenoCA(1),Breast-LobularCA(1),Lung-SCC(1),Ovary-AdenoCA(1),Stomach-AdenoCA(1),Uterus-AdenoCA(1)
DISRUPTION	'WDR7	18	Ovary-AdenoCA(4),Prost-AdenoCA(3),Breast-AdenoCA(2),Liver-HCC(2),Biliary-AdenoCA(1),Bone-Osteosarc(1),Eso-AdenoCA(1),Lung-SCC(1),Lymph-BNHL(1),SoftTissue-Liposarc(1),Stomach-AdenoCA(1)
DISRUPTION	'XPR1	18	Breast-AdenoCA(5),Ovary-AdenoCA(3),Uterus-AdenoCA(3),Prost-AdenoCA(2),SoftTissue-Liposarc(2),Eso-AdenoCA(1),Panc-AdenoCA(1),Skin-Melanoma(1)
DISRUPTION	'ZNF704	18	Liver-HCC(4),Prost-AdenoCA(4),Lung-AdenoCA(2),Ovary-AdenoCA(2),Breast-AdenoCA(1),Lung-SCC(1),Panc-AdenoCA(1),Skin-Melanoma(1),SoftTissue-Liposarc(1),Uterus-AdenoCA(1)
EXON_SKIP	'ARID1B	18	Breast-AdenoCA(4),Liver-HCC(3),Lung-SCC(2),Panc-AdenoCA(2),Bone-Osteosarc(1),Eso-AdenoCA(1),Lymph-BNHL(1),NA(1),Ovary-AdenoCA(1),Stomach-AdenoCA(1),Uterus-AdenoCA(1)
EXON_SKIP	'DNAH7	18	Liver-HCC(12),Biliary-AdenoCA(1),ColoRect-AdenoCA(1),Lymph-BNHL(1),Ovary-AdenoCA(1),Stomach-AdenoCA(1),Uterus-AdenoCA(1)
EXON_SKIP	'TRAPPC9	18	Eso-AdenoCA(3),Liver-HCC(3),Ovary-AdenoCA(3),Bladder-TCC(1),Bone-Osteosarc(1),ColoRect-AdenoCA(1),Head-SCC(1),Lung-SCC(1),Lymph-BNHL(1),Panc-AdenoCA(1),Prost-AdenoCA(1),Stomach-AdenoCA(1)
ITD	'FHIT	18	Panc-AdenoCA(3),Stomach-AdenoCA(3),Biliary-AdenoCA(2),ColoRect-AdenoCA(2),Lymph-BNHL(2),Skin-Melanoma(2),Bone-Osteosarc(1),Breast-AdenoCA(1),Eso-AdenoCA(1),Ovary-AdenoCA(1)
ITD	'SOX6	18	Prost-AdenoCA(10),Breast-AdenoCA(2),Uterus-AdenoCA(2),Bone-Epith(1),Bone-Osteosarc(1),Liver-HCC(1),Panc-AdenoCA(1)
DYSFUNCTIONAL_FUSION	'CASC8:PVT1	18	Prost-AdenoCA(13),Breast-AdenoCA(2),CNS-Medullo(1),Ovary-AdenoCA(1),Uterus-AdenoCA(1)
FUSION_5	'ARL15	18	Breast-AdenoCA(16),Lung-AdenoCA(1),Stomach-AdenoCA(1)
FUSION_5	'CCSER1	18	Ovary-AdenoCA(4),Breast-AdenoCA(3),Prost-AdenoCA(3),Skin-Melanoma(3),Liver-HCC(2),CNS-Medullo(1),Eso-AdenoCA(1),Panc-AdenoCA(1)
FUSION_5	'CDH13	18	Breast-AdenoCA(4),Lung-SCC(4),Skin-Melanoma(3),Lung-AdenoCA(2),Prost-AdenoCA(2),Bone-Osteosarc(1),SoftTissue-Liposarc(1),Stomach-AdenoCA(1)
FUSION_5	'CDK14	18	Prost-AdenoCA(4),Ovary-AdenoCA(3),Eso-AdenoCA(2),Liver-HCC(2),Lymph-BNHL(2),Panc-AdenoCA(2),Bone-Osteosarc(1),Lung-SCC(1),Skin-Melanoma(1)
FUSION_5	'CEP112	18	Breast-AdenoCA(6),Panc-AdenoCA(4),Skin-Melanoma(3),Ovary-AdenoCA(2),Bladder-TCC(1),Liver-HCC(1),Stomach-AdenoCA(1)
FUSION_5	'CLDN11	18	Panc-AdenoCA(7),Eso-AdenoCA(6),Breast-AdenoCA(3),Prost-AdenoCA(1),SoftTissue-Liposarc(1)
FUSION_5	'CTNNA3	18	Breast-AdenoCA(4),Eso-AdenoCA(3),Panc-AdenoCA(2),Biliary-AdenoCA(1),Head-SCC(1),Liver-HCC(1),Lung-SCC(1),Ovary-AdenoCA(1),Prost-AdenoCA(1),Skin-Melanoma(1),SoftTissue-Leiomyo(1),Stomach-AdenoCA(1)
FUSION_5	'DYRK1A	18	Prost-AdenoCA(10),Breast-AdenoCA(3),Bone-Osteosarc(1),Cervix-SCC(1),Lung-AdenoCA(1),Ovary-AdenoCA(1),Stomach-AdenoCA(1)
FUSION_5	'ETV6	18	Breast-AdenoCA(5),Prost-AdenoCA(5),Bone-Osteosarc(4),Panc-AdenoCA(2),Cervix-AdenoCA(1),ColoRect-AdenoCA(1)
FUSION_5	'FBXL20	18	Breast-AdenoCA(12),Stomach-AdenoCA(2),ColoRect-AdenoCA(1),Liver-HCC(1),Lymph-BNHL(1),Panc-AdenoCA(1)
FUSION_5	'LINC00535	18	Breast-AdenoCA(5),Prost-AdenoCA(5),Ovary-AdenoCA(3),Eso-AdenoCA(1),Liver-HCC(1),Lung-AdenoCA(1),Myeloid-AML(1),SoftTissue-Leiomyo(1)
FUSION_5	'MAP2	18	Prost-AdenoCA(10),Kidney-RCC(4),Lung-SCC(1),Ovary-AdenoCA(1),Panc-Endocrine(1),SoftTissue-Leiomyo(1)
FUSION_5	'MKLN1	18	SoftTissue-Liposarc(8),Skin-Melanoma(2),Uterus-AdenoCA(2),Biliary-AdenoCA(1),Bone-Osteosarc(1),CNS-GBM(1),Eso-AdenoCA(1),Kidney-RCC(1),Ovary-AdenoCA(1)
FUSION_5	'NLGN1	18	Prost-AdenoCA(4),Breast-AdenoCA(3),SoftTissue-Liposarc(3),Liver-HCC(2),Bone-Osteosarc(1),CNS-GBM(1),Cervix-SCC(1),Eso-AdenoCA(1),Ovary-AdenoCA(1),Skin-Melanoma(1)
FUSION_5	'NRXN1	18	Bone-Osteosarc(3),Panc-AdenoCA(3),Prost-AdenoCA(3),Stomach-AdenoCA(3),Breast-AdenoCA(2),Liver-HCC(2),Ovary-AdenoCA(2)
FUSION_5	'PIEZO2	18	Bone-Osteosarc(5),Panc-AdenoCA(5),Breast-AdenoCA(2),Head-SCC(1),Lung-AdenoCA(1),Lung-SCC(1),Ovary-AdenoCA(1),SoftTissue-Liposarc(1),Uterus-AdenoCA(1)
FUSION_5	'PPM1H	18	SoftTissue-Liposarc(8),CNS-GBM(4),Breast-AdenoCA(2),Ovary-AdenoCA(2),Bone-Osteosarc(1),Eso-AdenoCA(1)
FUSION_5	'PRKG1	18	Breast-AdenoCA(5),Bone-Osteosarc(3),Lung-SCC(2),Prost-AdenoCA(2),Skin-Melanoma(2),CNS-Medullo(1),Eso-AdenoCA(1),Liver-HCC(1),Ovary-AdenoCA(1)
FUSION_5	'PTPRN2	18	Skin-Melanoma(5),Kidney-RCC(3),Liver-HCC(2),Ovary-AdenoCA(2),Stomach-AdenoCA(2),Biliary-AdenoCA(1),Breast-AdenoCA(1),Prost-AdenoCA(1),Uterus-AdenoCA(1)
FUSION_5	'RORA	18	Ovary-AdenoCA(5),Breast-AdenoCA(4),Liver-HCC(3),Bladder-TCC(1),Breast-LobularCA(1),CNS-Oligo(1),Kidney-ChRCC(1),Panc-AdenoCA(1),Uterus-AdenoCA(1)
FUSION_5	'RP11-114H23.1	18	SoftTissue-Liposarc(10),Breast-AdenoCA(4),Prost-AdenoCA(2),Biliary-AdenoCA(1),Thy-AdenoCA(1)
FUSION_5	'RP11-123O10.4	18	SoftTissue-Liposarc(6),CNS-GBM(4),Skin-Melanoma(3),Breast-AdenoCA(2),Eso-AdenoCA(1),Prost-AdenoCA(1),Stomach-AdenoCA(1)
FUSION_5	'RP11-420N3.2	18	Breast-AdenoCA(5),CNS-GBM(2),Ovary-AdenoCA(2),Bladder-TCC(1),CNS-Medullo(1),CNS-Oligo(1),ColoRect-AdenoCA(1),Eso-AdenoCA(1),Liver-HCC(1),Lung-SCC(1),Panc-AdenoCA(1),Skin-Melanoma(1)
FUSION_5	'TP53	18	Prost-AdenoCA(10),Bone-Osteosarc(3),Lymph-CLL(2),Biliary-AdenoCA(1),Breast-LobularCA(1),Skin-Melanoma(1)
FUSION_5	'VPS13B	18	Breast-AdenoCA(7),Lung-AdenoCA(3),Ovary-AdenoCA(2),SoftTissue-Liposarc(2),Bladder-TCC(1),Head-SCC(1),Liver-HCC(1),Lymph-BNHL(1)
FUSION_3	'CHRM3	18	Breast-AdenoCA(6),SoftTissue-Liposarc(6),Eso-AdenoCA(2),Ovary-AdenoCA(2),Bladder-TCC(1),Stomach-AdenoCA(1)
FUSION_3	'CLDN11	18	Eso-AdenoCA(7),Panc-AdenoCA(5),Breast-AdenoCA(1),Cervix-SCC(1),Lung-SCC(1),Prost-AdenoCA(1),Skin-Melanoma(1),SoftTissue-Liposarc(1)
FUSION_3	'COX10-AS1	18	Prost-AdenoCA(17),SoftTissue-Liposarc(1)
FUSION_3	'EIF2B5	18	Breast-AdenoCA(3),Lung-SCC(3),Panc-AdenoCA(3),Liver-HCC(2),Biliary-AdenoCA(1),Bone-Osteosarc(1),CNS-GBM(1),Cervix-SCC(1),Eso-AdenoCA(1),Ovary-AdenoCA(1),Prost-AdenoCA(1)
FUSION_3	'FAM196A	18	Prost-AdenoCA(18)
FUSION_3	'FHIT	18	Breast-AdenoCA(3),Stomach-AdenoCA(3),Bladder-TCC(2),Kidney-RCC(2),Liver-HCC(2),Prost-AdenoCA(2),Bone-Osteosarc(1),Lung-AdenoCA(1),Panc-AdenoCA(1),Uterus-AdenoCA(1)
FUSION_3	'FRMD4A	18	Prost-AdenoCA(10),Breast-AdenoCA(2),ColoRect-AdenoCA(2),Eso-AdenoCA(1),Panc-Endocrine(1),SoftTissue-Liposarc(1),Uterus-AdenoCA(1)
FUSION_3	'GRM5	18	Breast-AdenoCA(9),Skin-Melanoma(4),CNS-GBM(1),Head-SCC(1),Ovary-AdenoCA(1),Panc-AdenoCA(1),Prost-AdenoCA(1)
FUSION_3	'IMMP2L	18	Breast-AdenoCA(4),Ovary-AdenoCA(2),Skin-Melanoma(2),Bone-Osteosarc(1),CNS-Medullo(1),ColoRect-AdenoCA(1),Eso-AdenoCA(1),Liver-HCC(1),Lymph-BNHL(1),Panc-AdenoCA(1),SoftTissue-Leiomyo(1),Stomach-AdenoCA(1),Uterus-AdenoCA(1)
FUSION_3	'MDM2	18	SoftTissue-Liposarc(9),CNS-GBM(3),Bone-Osteosarc(2),Bladder-TCC(1),Panc-AdenoCA(1),Stomach-AdenoCA(1),Uterus-AdenoCA(1)
FUSION_3	'MSI2	18	Breast-AdenoCA(16),Panc-AdenoCA(1),Skin-Melanoma(1)
FUSION_3	'NUP107	18	SoftTissue-Liposarc(11),Bone-Osteosarc(2),Breast-AdenoCA(2),Eso-AdenoCA(2),CNS-GBM(1)
FUSION_3	'PARK2	18	CNS-GBM(6),Eso-AdenoCA(2),Liver-HCC(2),Ovary-AdenoCA(2),Panc-AdenoCA(2),Biliary-AdenoCA(1),Breast-AdenoCA(1),SoftTissue-Liposarc(1),Stomach-AdenoCA(1)
FUSION_3	'PLCB1	18	Ovary-AdenoCA(4),CNS-GBM(2),Lung-AdenoCA(2),Panc-AdenoCA(2),Stomach-AdenoCA(2),Breast-AdenoCA(1),Panc-Endocrine(1),Prost-AdenoCA(1),SoftTissue-Leiomyo(1),SoftTissue-Liposarc(1),Uterus-AdenoCA(1)
FUSION_3	'RP11-114H23.1	18	SoftTissue-Liposarc(16),Biliary-AdenoCA(1),Prost-AdenoCA(1)
FUSION_3	'RP11-150C16.1	18	CNS-GBM(12),SoftTissue-Liposarc(3),Bone-Osteosarc(2),Lung-AdenoCA(1)
FUSION_3	'RP11-571M6.7	18	SoftTissue-Liposarc(12),CNS-GBM(5),ColoRect-AdenoCA(1)
FUSION_3	'RYR3	18	Prost-AdenoCA(10),Breast-AdenoCA(2),CNS-GBM(1),Ovary-AdenoCA(1),Panc-AdenoCA(1),Skin-Melanoma(1),SoftTissue-Leiomyo(1),SoftTissue-Liposarc(1)
FUSION_3	'SAMD12	18	Breast-AdenoCA(6),Head-SCC(2),Lymph-BNHL(2),Ovary-AdenoCA(2),Stomach-AdenoCA(2),Panc-AdenoCA(1),Prost-AdenoCA(1),SoftTissue-Leiomyo(1),Uterus-AdenoCA(1)
FUSION_3	'SPAG16	18	Prost-AdenoCA(6),Panc-AdenoCA(5),Eso-AdenoCA(3),Biliary-AdenoCA(1),Bladder-TCC(1),CNS-Oligo(1),Stomach-AdenoCA(1)
FUSION_3	'TMEM241	18	Panc-AdenoCA(9),Breast-AdenoCA(3),Stomach-AdenoCA(2),Biliary-AdenoCA(1),Eso-AdenoCA(1),Ovary-AdenoCA(1),Skin-Melanoma(1)
FUSION_3	'TTC28	18	Ovary-AdenoCA(4),Breast-AdenoCA(3),Skin-Melanoma(3),Prost-AdenoCA(2),Bone-Osteosarc(1),CNS-GBM(1),Liver-HCC(1),Lymph-BNHL(1),Panc-AdenoCA(1),SoftTissue-Leiomyo(1)
DISRUPTION	'AC010127.3	17	Breast-AdenoCA(4),Prost-AdenoCA(4),Liver-HCC(2),Bone-Osteosarc(1),ColoRect-AdenoCA(1),Eso-AdenoCA(1),Lymph-BNHL(1),Ovary-AdenoCA(1),Panc-AdenoCA(1),SoftTissue-Liposarc(1)
DISRUPTION	'AC144521.1	17	Prost-AdenoCA(6),Breast-AdenoCA(3),Skin-Melanoma(2),Stomach-AdenoCA(2),Biliary-AdenoCA(1),Bone-Osteosarc(1),Liver-HCC(1),SoftTissue-Liposarc(1)
DISRUPTION	'ACER3	17	Breast-AdenoCA(7),Skin-Melanoma(4),Liver-HCC(3),Eso-AdenoCA(2),Stomach-AdenoCA(1)
DISRUPTION	'ADAM18	17	Breast-AdenoCA(5),Liver-HCC(3),Panc-AdenoCA(2),ColoRect-AdenoCA(1),Lung-AdenoCA(1),Lung-SCC(1),NA(1),Ovary-AdenoCA(1),Skin-Melanoma(1),Stomach-AdenoCA(1)
DISRUPTION	'ALDH1A2	17	Panc-AdenoCA(4),Prost-AdenoCA(3),Ovary-AdenoCA(2),Stomach-AdenoCA(2),Bone-Osteosarc(1),Breast-AdenoCA(1),Eso-AdenoCA(1),Liver-HCC(1),Panc-Endocrine(1),Skin-Melanoma(1)
DISRUPTION	'ARHGEF26	17	Prost-AdenoCA(12),Breast-AdenoCA(3),Lymph-BNHL(1),Uterus-AdenoCA(1)
DISRUPTION	'BACH1	17	Prost-AdenoCA(5),Breast-AdenoCA(2),Panc-AdenoCA(2),Bone-Epith(1),Bone-Osteosarc(1),CNS-GBM(1),CNS-Medullo(1),Eso-AdenoCA(1),Kidney-RCC(1),Lung-SCC(1),Ovary-AdenoCA(1)
DISRUPTION	'BASP1	17	Skin-Melanoma(5),SoftTissue-Liposarc(3),Bladder-TCC(2),Bone-Osteosarc(1),Breast-AdenoCA(1),Eso-AdenoCA(1),Liver-HCC(1),Lung-AdenoCA(1),Lung-SCC(1),Ovary-AdenoCA(1)
DISRUPTION	'BCKDHB	17	Prost-AdenoCA(11),Breast-AdenoCA(2),Liver-HCC(2),Stomach-AdenoCA(2)
DISRUPTION	'BTBD9	17	Panc-AdenoCA(5),Breast-AdenoCA(4),Ovary-AdenoCA(2),SoftTissue-Liposarc(2),Eso-AdenoCA(1),Lung-SCC(1),Skin-Melanoma(1),Stomach-AdenoCA(1)
DISRUPTION	'CLTA	17	Ovary-AdenoCA(3),Eso-AdenoCA(2),Lung-SCC(2),Breast-AdenoCA(1),CNS-GBM(1),Liver-HCC(1),Lung-AdenoCA(1),Panc-Endocrine(1),Prost-AdenoCA(1),Skin-Melanoma(1),SoftTissue-Liposarc(1),Stomach-AdenoCA(1),Uterus-AdenoCA(1)
DISRUPTION	'DGKI	17	Skin-Melanoma(4),Breast-AdenoCA(3),Ovary-AdenoCA(2),Panc-AdenoCA(2),SoftTissue-Liposarc(2),Bone-Osteosarc(1),Eso-AdenoCA(1),Liver-HCC(1),SoftTissue-Leiomyo(1)
DISRUPTION	'DISC1	17	Breast-AdenoCA(3),Biliary-AdenoCA(2),Panc-AdenoCA(2),Skin-Melanoma(2),Bone-Osteosarc(1),ColoRect-AdenoCA(1),Liver-HCC(1),Ovary-AdenoCA(1),Panc-Endocrine(1),Prost-AdenoCA(1),SoftTissue-Liposarc(1),Stomach-AdenoCA(1)
DISRUPTION	'DLEU1	17	Prost-AdenoCA(3),Breast-AdenoCA(2),Eso-AdenoCA(2),Ovary-AdenoCA(2),Biliary-AdenoCA(1),Bladder-TCC(1),CNS-GBM(1),Lymph-BNHL(1),Lymph-CLL(1),Panc-AdenoCA(1),Skin-Melanoma(1),Stomach-AdenoCA(1)
DISRUPTION	'DOCK3	17	Prost-AdenoCA(4),Ovary-AdenoCA(3),Bladder-TCC(1),Breast-AdenoCA(1),Eso-AdenoCA(1),Kidney-ChRCC(1),Liver-HCC(1),Panc-AdenoCA(1),Skin-Melanoma(1),SoftTissue-Liposarc(1),Stomach-AdenoCA(1),Uterus-AdenoCA(1)
DISRUPTION	'EPB41L3	17	Ovary-AdenoCA(3),Panc-AdenoCA(3),Liver-HCC(2),Bone-Osteosarc(1),Breast-AdenoCA(1),Cervix-SCC(1),Eso-AdenoCA(1),Head-SCC(1),Prost-AdenoCA(1),Skin-Melanoma(1),SoftTissue-Leiomyo(1),SoftTissue-Liposarc(1)
DISRUPTION	'FAM110B	17	Prost-AdenoCA(7),Liver-HCC(2),Ovary-AdenoCA(2),Breast-AdenoCA(1),ColoRect-AdenoCA(1),Panc-AdenoCA(1),Skin-Melanoma(1),Stomach-AdenoCA(1),Uterus-AdenoCA(1)
DISRUPTION	'FAM171B	17	Prost-AdenoCA(4),Uterus-AdenoCA(3),Liver-HCC(2),Lung-SCC(2),Bladder-TCC(1),Bone-Osteosarc(1),Eso-AdenoCA(1),Lymph-BNHL(1),Panc-AdenoCA(1),Skin-Melanoma(1)
DISRUPTION	'FAM49B	17	Bone-Osteosarc(4),Breast-AdenoCA(3),Panc-AdenoCA(3),Ovary-AdenoCA(2),Lung-SCC(1),Prost-AdenoCA(1),Skin-Melanoma(1),SoftTissue-Liposarc(1),Stomach-AdenoCA(1)
DISRUPTION	'FBXW7	17	Breast-AdenoCA(4),Eso-AdenoCA(3),ColoRect-AdenoCA(2),Liver-HCC(2),Skin-Melanoma(2),Bladder-TCC(1),Ovary-AdenoCA(1),SoftTissue-Liposarc(1),Stomach-AdenoCA(1)
DISRUPTION	'FNDC3B	17	Breast-AdenoCA(3),Eso-AdenoCA(3),Ovary-AdenoCA(3),Liver-HCC(2),Prost-AdenoCA(2),Cervix-SCC(1),Lung-SCC(1),Panc-AdenoCA(1),Uterus-AdenoCA(1)
DISRUPTION	'GABRB2	17	Prost-AdenoCA(10),Eso-AdenoCA(1),Kidney-ChRCC(1),Kidney-RCC(1),Liver-HCC(1),Ovary-AdenoCA(1),Panc-AdenoCA(1),SoftTissue-Liposarc(1)
DISRUPTION	'GLI3	17	Breast-AdenoCA(4),Panc-AdenoCA(4),Ovary-AdenoCA(2),Bone-Osteosarc(1),CNS-GBM(1),Eso-AdenoCA(1),Liver-HCC(1),Lung-SCC(1),Lymph-BNHL(1),Stomach-AdenoCA(1)
DISRUPTION	'HCAR1	17	Prost-AdenoCA(14),Breast-AdenoCA(1),Breast-LobularCA(1),ColoRect-AdenoCA(1)
DISRUPTION	'HMCN1	17	SoftTissue-Liposarc(4),Breast-AdenoCA(3),Panc-AdenoCA(3),Prost-AdenoCA(2),Eso-AdenoCA(1),Liver-HCC(1),Lymph-BNHL(1),Ovary-AdenoCA(1),Skin-Melanoma(1)
DISRUPTION	'IQCJ-SCHIP1	17	Liver-HCC(3),Ovary-AdenoCA(3),Panc-AdenoCA(3),Bone-Osteosarc(2),Breast-AdenoCA(2),Eso-AdenoCA(2),Lung-SCC(2)
DISRUPTION	'KCND2	17	Breast-AdenoCA(3),Prost-AdenoCA(3),Eso-AdenoCA(2),Bone-Epith(1),Breast-LobularCA(1),ColoRect-AdenoCA(1),Kidney-RCC(1),Lung-SCC(1),Lymph-BNHL(1),Skin-Melanoma(1),SoftTissue-Liposarc(1),Stomach-AdenoCA(1)
DISRUPTION	'KIAA1328	17	Panc-AdenoCA(5),Eso-AdenoCA(2),Lung-SCC(2),Ovary-AdenoCA(2),Biliary-AdenoCA(1),Bladder-TCC(1),Cervix-AdenoCA(1),ColoRect-AdenoCA(1),Lung-AdenoCA(1),Skin-Melanoma(1)
DISRUPTION	'LDLRAD4	17	Panc-AdenoCA(4),Eso-AdenoCA(3),Breast-AdenoCA(2),Ovary-AdenoCA(2),SoftTissue-Liposarc(2),Head-SCC(1),Lung-SCC(1),Lymph-BNHL(1),Skin-Melanoma(1)
DISRUPTION	'LEKR1	17	Prost-AdenoCA(6),Breast-AdenoCA(2),Panc-AdenoCA(2),Bone-Osteosarc(1),Eso-AdenoCA(1),Lung-SCC(1),Ovary-AdenoCA(1),Skin-Melanoma(1),SoftTissue-Leiomyo(1),SoftTissue-Liposarc(1)
DISRUPTION	'LGR5	17	SoftTissue-Liposarc(6),Breast-AdenoCA(3),Bone-Osteosarc(2),Liver-HCC(2),Panc-AdenoCA(2),Eso-AdenoCA(1),Skin-Melanoma(1)
DISRUPTION	'LINC00276	17	Eso-AdenoCA(3),Prost-AdenoCA(3),Head-SCC(2),Liver-HCC(2),Panc-AdenoCA(2),Breast-AdenoCA(1),CNS-Medullo(1),Lung-SCC(1),Skin-Melanoma(1),Stomach-AdenoCA(1)
DISRUPTION	'LRIG3	17	CNS-GBM(3),SoftTissue-Liposarc(3),Lung-AdenoCA(2),Prost-AdenoCA(2),Skin-Melanoma(2),Stomach-AdenoCA(2),Eso-AdenoCA(1),Lymph-BNHL(1),Panc-AdenoCA(1)
DISRUPTION	'LRP5	17	Breast-AdenoCA(4),Liver-HCC(3),Bladder-TCC(2),Eso-AdenoCA(2),Skin-Melanoma(2),Head-SCC(1),Ovary-AdenoCA(1),Stomach-AdenoCA(1),Uterus-AdenoCA(1)
DISRUPTION	'MAST4	17	Panc-AdenoCA(3),Breast-AdenoCA(2),Kidney-ChRCC(2),Liver-HCC(2),SoftTissue-Liposarc(2),Bladder-TCC(1),CNS-GBM(1),Eso-AdenoCA(1),Head-SCC(1),SoftTissue-Leiomyo(1),Uterus-AdenoCA(1)
DISRUPTION	'MDM2	17	SoftTissue-Liposarc(11),Bone-Osteosarc(1),CNS-GBM(1),Liver-HCC(1),Panc-AdenoCA(1),Skin-Melanoma(1),Stomach-AdenoCA(1)
DISRUPTION	'MSRB3	17	SoftTissue-Liposarc(5),Breast-AdenoCA(2),Stomach-AdenoCA(2),Bone-Epith(1),Bone-Osteosarc(1),Eso-AdenoCA(1),Liver-HCC(1),Ovary-AdenoCA(1),Panc-AdenoCA(1),Prost-AdenoCA(1),Skin-Melanoma(1)
DISRUPTION	'NEB	17	Prost-AdenoCA(9),Ovary-AdenoCA(3),Eso-AdenoCA(1),Kidney-RCC(1),Liver-HCC(1),Lung-SCC(1),Lymph-BNHL(1)
DISRUPTION	'NUP210L	17	Prost-AdenoCA(5),Breast-AdenoCA(4),Biliary-AdenoCA(2),Liver-HCC(2),Uterus-AdenoCA(2),Eso-AdenoCA(1),SoftTissue-Liposarc(1)
DISRUPTION	'PLXNA4	17	Prost-AdenoCA(3),Breast-AdenoCA(2),Skin-Melanoma(2),CNS-GBM(1),Eso-AdenoCA(1),Liver-HCC(1),Lung-SCC(1),Lymph-BNHL(1),Ovary-AdenoCA(1),Panc-AdenoCA(1),SoftTissue-Liposarc(1),Stomach-AdenoCA(1),Uterus-AdenoCA(1)
DISRUPTION	'PRR4	17	Prost-AdenoCA(4),Breast-AdenoCA(3),Ovary-AdenoCA(3),Liver-HCC(2),Bone-Osteosarc(1),CNS-Medullo(1),Head-SCC(1),Kidney-RCC(1),SoftTissue-Liposarc(1)
DISRUPTION	'RNGTT	17	Breast-AdenoCA(6),Prost-AdenoCA(3),Panc-AdenoCA(2),SoftTissue-Liposarc(2),Bone-Benign(1),Head-SCC(1),Kidney-RCC(1),Lung-SCC(1)
DISRUPTION	'RP11-238K6.1	17	Breast-AdenoCA(4),Stomach-AdenoCA(3),CNS-GBM(2),Panc-AdenoCA(2),Prost-AdenoCA(2),Biliary-AdenoCA(1),Lung-AdenoCA(1),Ovary-AdenoCA(1),SoftTissue-Liposarc(1)
DISRUPTION	'RP11-454P21.1	17	Ovary-AdenoCA(3),Skin-Melanoma(3),Breast-AdenoCA(2),Prost-AdenoCA(2),SoftTissue-Liposarc(2),Bone-Epith(1),Bone-Osteosarc(1),CNS-GBM(1),Eso-AdenoCA(1),Kidney-ChRCC(1)
DISRUPTION	'RP11-56A10.1	17	Ovary-AdenoCA(6),Prost-AdenoCA(4),Breast-AdenoCA(2),SoftTissue-Liposarc(2),Panc-AdenoCA(1),Skin-Melanoma(1),Stomach-AdenoCA(1)
DISRUPTION	'RP11-731F5.2	17	Lymph-BNHL(15),Lymph-CLL(1),Prost-AdenoCA(1)
DISRUPTION	'RP11-753H16.3	17	SoftTissue-Liposarc(4),Liver-HCC(3),Panc-AdenoCA(3),Ovary-AdenoCA(2),Lung-SCC(1),Prost-AdenoCA(1),Skin-Melanoma(1),Stomach-AdenoCA(1),Uterus-AdenoCA(1)
DISRUPTION	'RP11-85M11.2	17	Breast-AdenoCA(5),Prost-AdenoCA(3),Head-SCC(2),Lung-SCC(2),Panc-AdenoCA(2),Kidney-RCC(1),Liver-HCC(1),Ovary-AdenoCA(1)
DISRUPTION	'RPSAP52	17	SoftTissue-Liposarc(8),Bone-Osteosarc(4),Eso-AdenoCA(1),Liver-HCC(1),Lung-AdenoCA(1),Panc-AdenoCA(1),Skin-Melanoma(1)
DISRUPTION	'RUNX2	17	Breast-AdenoCA(4),Liver-HCC(3),Bone-Osteosarc(2),Eso-AdenoCA(2),Panc-AdenoCA(2),CNS-GBM(1),ColoRect-AdenoCA(1),Ovary-AdenoCA(1),Skin-Melanoma(1)
DISRUPTION	'RYR3	17	Prost-AdenoCA(10),Breast-AdenoCA(2),CNS-GBM(2),Eso-AdenoCA(1),Panc-AdenoCA(1),SoftTissue-Liposarc(1)
DISRUPTION	'SCAPER	17	Breast-AdenoCA(4),Ovary-AdenoCA(3),Eso-AdenoCA(2),Biliary-AdenoCA(1),ColoRect-AdenoCA(1),Liver-HCC(1),Panc-AdenoCA(1),Prost-AdenoCA(1),Skin-Melanoma(1),SoftTissue-Liposarc(1),Uterus-AdenoCA(1)
DISRUPTION	'SDK1	17	Panc-AdenoCA(4),Skin-Melanoma(3),Breast-AdenoCA(2),CNS-GBM(1),Liver-HCC(1),Lung-AdenoCA(1),Lymph-BNHL(1),Panc-Endocrine(1),Prost-AdenoCA(1),SoftTissue-Leiomyo(1),Uterus-AdenoCA(1)
DISRUPTION	'SGMS1	17	Prost-AdenoCA(4),Breast-AdenoCA(2),Liver-HCC(2),Bone-Osteosarc(1),CNS-GBM(1),ColoRect-AdenoCA(1),Eso-AdenoCA(1),Head-SCC(1),Lung-SCC(1),Panc-AdenoCA(1),SoftTissue-Leiomyo(1),Stomach-AdenoCA(1)
DISRUPTION	'SLC16A7	17	SoftTissue-Liposarc(4),CNS-GBM(2),Skin-Melanoma(2),Stomach-AdenoCA(2),Breast-AdenoCA(1),Breast-LobularCA(1),CNS-Medullo(1),Liver-HCC(1),Lymph-BNHL(1),Prost-AdenoCA(1),SoftTissue-Leiomyo(1)
DISRUPTION	'STARD13	17	Breast-AdenoCA(4),Eso-AdenoCA(3),Prost-AdenoCA(3),Panc-AdenoCA(2),Bone-Osteosarc(1),Liver-HCC(1),Lung-AdenoCA(1),Skin-Melanoma(1),Stomach-AdenoCA(1)
DISRUPTION	'SYN3	17	Breast-AdenoCA(4),Bone-Osteosarc(2),Liver-HCC(2),Skin-Melanoma(2),Bladder-TCC(1),ColoRect-AdenoCA(1),Eso-AdenoCA(1),Head-SCC(1),Panc-AdenoCA(1),Prost-AdenoCA(1),SoftTissue-Leiomyo(1)
DISRUPTION	'TCF7L2	17	Prost-AdenoCA(5),Breast-AdenoCA(3),Liver-HCC(3),Biliary-AdenoCA(1),Bladder-TCC(1),CNS-Medullo(1),ColoRect-AdenoCA(1),Ovary-AdenoCA(1),Panc-AdenoCA(1)
DISRUPTION	'TNS3	17	Ovary-AdenoCA(4),Breast-AdenoCA(3),Eso-AdenoCA(3),CNS-GBM(2),Bone-Osteosarc(1),Liver-HCC(1),Lung-AdenoCA(1),Lung-SCC(1),SoftTissue-Liposarc(1)
DISRUPTION	'TPST1	17	Breast-AdenoCA(4),Skin-Melanoma(3),Liver-HCC(2),Lung-SCC(2),Bone-Osteosarc(1),Cervix-SCC(1),Lung-AdenoCA(1),Panc-AdenoCA(1),Prost-AdenoCA(1),Stomach-AdenoCA(1)
DISRUPTION	'WDFY4	17	Prost-AdenoCA(9),Ovary-AdenoCA(2),Bladder-TCC(1),Bone-Osteosarc(1),Eso-AdenoCA(1),Liver-HCC(1),Panc-Endocrine(1),Skin-Melanoma(1)
DISRUPTION	'XRRA1	17	Breast-AdenoCA(8),Skin-Melanoma(5),Panc-AdenoCA(2),Head-SCC(1),Stomach-AdenoCA(1)
DISRUPTION	'ZNF675	17	Prost-AdenoCA(6),Breast-AdenoCA(3),Liver-HCC(3),Bone-Osteosarc(1),Eso-AdenoCA(1),Kidney-ChRCC(1),Lung-SCC(1),Stomach-AdenoCA(1)
EXON_SKIP	'AGAP1	17	Stomach-AdenoCA(5),Eso-AdenoCA(4),Liver-HCC(4),Bone-Epith(1),Breast-AdenoCA(1),ColoRect-AdenoCA(1),Panc-AdenoCA(1)
EXON_SKIP	'BCAS3	17	Breast-AdenoCA(4),Ovary-AdenoCA(3),Panc-AdenoCA(3),Eso-AdenoCA(2),ColoRect-AdenoCA(1),Liver-HCC(1),Lung-AdenoCA(1),Lymph-BNHL(1),Uterus-AdenoCA(1)
EXON_SKIP	'LARGE	17	Liver-HCC(5),Eso-AdenoCA(3),Panc-AdenoCA(3),Breast-AdenoCA(2),Biliary-AdenoCA(1),ColoRect-AdenoCA(1),Skin-Melanoma(1),SoftTissue-Liposarc(1)
EXON_SKIP	'LINC00669	17	Eso-AdenoCA(4),Liver-HCC(2),Lung-SCC(2),Bladder-TCC(1),Breast-AdenoCA(1),ColoRect-AdenoCA(1),Lung-AdenoCA(1),Ovary-AdenoCA(1),Panc-AdenoCA(1),Skin-Melanoma(1),SoftTissue-Liposarc(1),Stomach-AdenoCA(1)
EXON_SKIP	'RAD51B	17	Eso-AdenoCA(3),Liver-HCC(3),Ovary-AdenoCA(2),Prost-AdenoCA(2),Bladder-TCC(1),Bone-Epith(1),Breast-AdenoCA(1),Lung-SCC(1),Panc-AdenoCA(1),Skin-Melanoma(1),Uterus-AdenoCA(1)
EXON_SKIP	'SPAG16	17	Prost-AdenoCA(4),Uterus-AdenoCA(3),Ovary-AdenoCA(2),Panc-AdenoCA(2),Stomach-AdenoCA(2),Breast-AdenoCA(1),Eso-AdenoCA(1),Lung-SCC(1),Lymph-BNHL(1)
EXON_SKIP	'TENM4	17	Breast-AdenoCA(5),Skin-Melanoma(3),Lung-SCC(2),Ovary-AdenoCA(2),Eso-AdenoCA(1),Liver-HCC(1),Prost-AdenoCA(1),Stomach-AdenoCA(1),Uterus-AdenoCA(1)
FUSION_5	'ACACA	17	Stomach-AdenoCA(4),Head-SCC(3),Panc-AdenoCA(3),Breast-AdenoCA(2),Ovary-AdenoCA(2),Bone-Osteosarc(1),Kidney-RCC(1),Skin-Melanoma(1)
FUSION_5	'ANK1	17	Prost-AdenoCA(4),Breast-AdenoCA(2),Skin-Melanoma(2),Uterus-AdenoCA(2),Bone-Osteosarc(1),Breast-LobularCA(1),Eso-AdenoCA(1),Lung-SCC(1),Ovary-AdenoCA(1),Panc-AdenoCA(1),SoftTissue-Leiomyo(1)
FUSION_5	'AUTS2	17	Panc-AdenoCA(3),Skin-Melanoma(3),Breast-AdenoCA(2),Eso-AdenoCA(2),Ovary-AdenoCA(2),Stomach-AdenoCA(2),ColoRect-AdenoCA(1),Lung-SCC(1),SoftTissue-Liposarc(1)
FUSION_5	'CA10	17	Breast-AdenoCA(5),Eso-AdenoCA(5),Panc-AdenoCA(3),Prost-AdenoCA(2),Ovary-AdenoCA(1),Skin-Melanoma(1)
FUSION_5	'DNAH9	17	Prost-AdenoCA(5),Bladder-TCC(3),Breast-AdenoCA(3),Skin-Melanoma(3),Lymph-CLL(1),Panc-AdenoCA(1),Stomach-AdenoCA(1)
FUSION_5	'FGF12	17	Breast-AdenoCA(6),Panc-AdenoCA(3),Head-SCC(2),Liver-HCC(2),Lung-SCC(2),Bone-Osteosarc(1),Panc-Endocrine(1)
FUSION_5	'KCNQ5	17	Breast-AdenoCA(3),Prost-AdenoCA(3),Liver-HCC(2),Lung-AdenoCA(2),Ovary-AdenoCA(2),Skin-Melanoma(2),Biliary-AdenoCA(1),Bone-Osteosarc(1),Lymph-BNHL(1)
FUSION_5	'LRRTM4	17	Prost-AdenoCA(6),Eso-AdenoCA(5),Breast-AdenoCA(2),Head-SCC(1),Ovary-AdenoCA(1),Skin-Melanoma(1),Stomach-AdenoCA(1)
FUSION_5	'MYRFL	17	SoftTissue-Liposarc(11),Skin-Melanoma(2),Bone-Osteosarc(1),Liver-HCC(1),Ovary-AdenoCA(1),Stomach-AdenoCA(1)
FUSION_5	'OXR1	17	Breast-AdenoCA(4),Ovary-AdenoCA(3),Prost-AdenoCA(3),ColoRect-AdenoCA(2),Head-SCC(1),Liver-HCC(1),Skin-Melanoma(1),SoftTissue-Liposarc(1),Stomach-AdenoCA(1)
FUSION_5	'PPM1L	17	Prost-AdenoCA(9),Breast-AdenoCA(3),Lung-SCC(2),Head-SCC(1),Liver-HCC(1),Ovary-AdenoCA(1)
FUSION_5	'PTPRQ	17	SoftTissue-Liposarc(11),Skin-Melanoma(3),Uterus-AdenoCA(2),Liver-HCC(1)
FUSION_5	'RP11-242P2.1	17	Breast-AdenoCA(16),Lung-SCC(1)
FUSION_5	'RP11-423H2.1	17	Liver-HCC(15),Biliary-AdenoCA(1),Ovary-AdenoCA(1)
FUSION_5	'RP11-770E5.1	17	Prost-AdenoCA(14),Breast-AdenoCA(2),Skin-Melanoma(1)
FUSION_5	'SLC39A11	17	Breast-AdenoCA(4),Liver-HCC(3),Stomach-AdenoCA(3),Eso-AdenoCA(2),Bone-Osteosarc(1),Cervix-SCC(1),Ovary-AdenoCA(1),Skin-Melanoma(1),SoftTissue-Liposarc(1)
FUSION_5	'TMEM241	17	Panc-AdenoCA(5),Eso-AdenoCA(3),Skin-Melanoma(3),Biliary-AdenoCA(2),Stomach-AdenoCA(2),Breast-AdenoCA(1),SoftTissue-Liposarc(1)
FUSION_5	'TMTC2	17	SoftTissue-Liposarc(10),Stomach-AdenoCA(2),ColoRect-AdenoCA(1),Liver-HCC(1),Lung-AdenoCA(1),Panc-AdenoCA(1),Skin-Melanoma(1)
FUSION_5	'TNRC6B	17	Liver-HCC(6),Skin-Melanoma(3),Panc-AdenoCA(2),Eso-AdenoCA(1),Head-SCC(1),Kidney-ChRCC(1),Lung-AdenoCA(1),Ovary-AdenoCA(1),SoftTissue-Liposarc(1)
FUSION_5	'TRPC6	17	Breast-AdenoCA(2),Cervix-SCC(2),Lung-SCC(2),Ovary-AdenoCA(2),Skin-Melanoma(2),Stomach-AdenoCA(2),Bone-Osteosarc(1),Head-SCC(1),Panc-AdenoCA(1),Prost-AdenoCA(1),SoftTissue-Leiomyo(1)
FUSION_5	'ZNF407	17	Prost-AdenoCA(10),Lymph-BNHL(2),Bone-Osteosarc(1),Ovary-AdenoCA(1),Panc-AdenoCA(1),SoftTissue-Leiomyo(1),Uterus-AdenoCA(1)
FUSION_3	'AC007682.1	17	Prost-AdenoCA(4),Lung-SCC(3),Stomach-AdenoCA(3),Panc-AdenoCA(2),Breast-AdenoCA(1),Eso-AdenoCA(1),Liver-HCC(1),Panc-Endocrine(1),Skin-Melanoma(1)
FUSION_3	'AFF4	17	Prost-AdenoCA(10),Eso-AdenoCA(2),Breast-AdenoCA(1),CNS-Medullo(1),Lymph-CLL(1),Ovary-AdenoCA(1),Panc-AdenoCA(1)
FUSION_3	'ASAP1	17	Liver-HCC(3),Ovary-AdenoCA(2),Panc-AdenoCA(2),Stomach-AdenoCA(2),Biliary-AdenoCA(1),Bone-Osteosarc(1),Breast-AdenoCA(1),CNS-GBM(1),CNS-Medullo(1),Eso-AdenoCA(1),Prost-AdenoCA(1),Uterus-AdenoCA(1)
FUSION_3	'CACNA2D3	17	Stomach-AdenoCA(4),Breast-AdenoCA(3),Ovary-AdenoCA(3),Panc-AdenoCA(2),Eso-AdenoCA(1),Kidney-RCC(1),Prost-AdenoCA(1),Skin-Melanoma(1),Uterus-AdenoCA(1)
FUSION_3	'ERC1	17	Breast-AdenoCA(7),Eso-AdenoCA(2),Lung-SCC(2),Ovary-AdenoCA(2),Bone-Osteosarc(1),SoftTissue-Liposarc(1),Stomach-AdenoCA(1),Thy-AdenoCA(1)
FUSION_3	'FMN2	17	Breast-AdenoCA(5),Liver-HCC(2),Panc-AdenoCA(2),Prost-AdenoCA(2),Skin-Melanoma(2),Bone-Osteosarc(1),Lung-AdenoCA(1),Lung-SCC(1),Lymph-BNHL(1)
FUSION_3	'GLIS3	17	Skin-Melanoma(8),Breast-AdenoCA(3),Prost-AdenoCA(3),Lung-SCC(2),Stomach-AdenoCA(1)
FUSION_3	'INTS4	17	Prost-AdenoCA(5),Skin-Melanoma(5),Breast-AdenoCA(2),Lymph-BNHL(2),ColoRect-AdenoCA(1),Ovary-AdenoCA(1),Stomach-AdenoCA(1)
FUSION_3	'IQCJ-SCHIP1	17	Breast-AdenoCA(4),Liver-HCC(3),Lung-SCC(2),Ovary-AdenoCA(2),Biliary-AdenoCA(1),Bladder-TCC(1),Bone-Osteosarc(1),Kidney-ChRCC(1),Panc-AdenoCA(1),Stomach-AdenoCA(1)
FUSION_3	'KCNC2	17	SoftTissue-Liposarc(12),Bone-Osteosarc(1),Breast-AdenoCA(1),CNS-Medullo(1),Lung-AdenoCA(1),Prost-AdenoCA(1)
FUSION_3	'KCNQ5	17	Breast-AdenoCA(8),Ovary-AdenoCA(2),Skin-Melanoma(2),Biliary-AdenoCA(1),Bone-Osteosarc(1),Eso-AdenoCA(1),Lung-SCC(1),Prost-AdenoCA(1)
FUSION_3	'LINC00511	17	Breast-AdenoCA(4),Eso-AdenoCA(3),Skin-Melanoma(3),Stomach-AdenoCA(3),Bladder-TCC(1),CNS-GBM(1),Panc-AdenoCA(1),Uterus-AdenoCA(1)
FUSION_3	'LPP	17	Eso-AdenoCA(3),Bladder-TCC(2),Bone-Osteosarc(2),Lung-AdenoCA(2),Lung-SCC(2),Breast-AdenoCA(1),CNS-GBM(1),Head-SCC(1),Prost-AdenoCA(1),Skin-Melanoma(1),Uterus-AdenoCA(1)
FUSION_3	'MIPOL1	17	Breast-AdenoCA(9),Prost-AdenoCA(5),Bladder-TCC(1),Eso-AdenoCA(1),Stomach-AdenoCA(1)
FUSION_3	'MKLN1	17	SoftTissue-Liposarc(6),Uterus-AdenoCA(5),Bone-Osteosarc(1),Breast-AdenoCA(1),CNS-GBM(1),Kidney-RCC(1),Panc-AdenoCA(1),Skin-Melanoma(1)
FUSION_3	'OXR1	17	Liver-HCC(4),Prost-AdenoCA(4),Breast-AdenoCA(2),Eso-AdenoCA(1),Head-SCC(1),Lung-SCC(1),Lymph-BNHL(1),Ovary-AdenoCA(1),Panc-AdenoCA(1),Stomach-AdenoCA(1)
FUSION_3	'PPM1H	17	SoftTissue-Liposarc(7),CNS-GBM(5),Liver-HCC(2),Ovary-AdenoCA(2),Breast-AdenoCA(1)
FUSION_3	'PRKCA	17	Breast-AdenoCA(10),Eso-AdenoCA(4),Skin-Melanoma(2),SoftTissue-Liposarc(1)
FUSION_3	'RB1	17	Prost-AdenoCA(6),Ovary-AdenoCA(4),Breast-AdenoCA(3),Biliary-AdenoCA(1),Bone-Osteosarc(1),Lung-SCC(1),SoftTissue-Liposarc(1)
FUSION_3	'RBFOX1	17	Panc-AdenoCA(5),Bone-Osteosarc(4),Breast-AdenoCA(2),Bladder-TCC(1),CNS-GBM(1),ColoRect-AdenoCA(1),Eso-AdenoCA(1),Head-SCC(1),Stomach-AdenoCA(1)
FUSION_3	'SLC35E3	17	SoftTissue-Liposarc(14),Bone-Osteosarc(3)
FUSION_3	'SLC39A11	17	Panc-AdenoCA(4),Breast-AdenoCA(3),ColoRect-AdenoCA(2),Eso-AdenoCA(2),Skin-Melanoma(2),Liver-HCC(1),Prost-AdenoCA(1),Stomach-AdenoCA(1),Uterus-AdenoCA(1)
FUSION_3	'SYNE1	17	Prost-AdenoCA(10),Panc-AdenoCA(3),Breast-AdenoCA(2),Ovary-AdenoCA(2)
FUSION_3	'TMEM68	17	Prost-AdenoCA(16),Liver-HCC(1)
FUSION_3	'ZNF521	17	Panc-AdenoCA(6),Eso-AdenoCA(5),Stomach-AdenoCA(3),ColoRect-AdenoCA(1),Ovary-AdenoCA(1),SoftTissue-Liposarc(1)
FUSION_3	'ZNRF3	17	Prost-AdenoCA(8),Liver-HCC(3),Uterus-AdenoCA(2),Lung-AdenoCA(1),Ovary-AdenoCA(1),Panc-AdenoCA(1),Skin-Melanoma(1)
DISRUPTION	'AC007682.1	16	Prost-AdenoCA(5),Lung-SCC(2),Panc-AdenoCA(2),Bone-Osteosarc(1),CNS-Medullo(1),ColoRect-AdenoCA(1),Eso-AdenoCA(1),Liver-HCC(1),Lymph-BNHL(1),Skin-Melanoma(1)
DISRUPTION	'AC022431.2	16	Uterus-AdenoCA(3),Breast-AdenoCA(2),Lung-AdenoCA(2),Ovary-AdenoCA(2),CNS-Medullo(1),ColoRect-AdenoCA(1),Kidney-ChRCC(1),Lung-SCC(1),Panc-AdenoCA(1),Prost-AdenoCA(1),Skin-Melanoma(1)
DISRUPTION	'AC108142.1	16	Breast-AdenoCA(3),Skin-Melanoma(3),Ovary-AdenoCA(2),Prost-AdenoCA(2),Liver-HCC(1),Lung-SCC(1),Panc-AdenoCA(1),Panc-Endocrine(1),SoftTissue-Liposarc(1),Uterus-AdenoCA(1)
DISRUPTION	'ADAM9	16	Breast-AdenoCA(5),Liver-HCC(2),Uterus-AdenoCA(2),ColoRect-AdenoCA(1),Lung-SCC(1),Ovary-AdenoCA(1),Panc-AdenoCA(1),Prost-AdenoCA(1),SoftTissue-Liposarc(1),Stomach-AdenoCA(1)
DISRUPTION	'AGO2	16	Uterus-AdenoCA(4),Breast-AdenoCA(2),Eso-AdenoCA(2),Panc-AdenoCA(2),Bone-Osteosarc(1),Liver-HCC(1),Lung-AdenoCA(1),Lung-SCC(1),Ovary-AdenoCA(1),Skin-Melanoma(1)
DISRUPTION	'AKNA	16	Prost-AdenoCA(9),Breast-AdenoCA(2),Bone-Osteosarc(1),CNS-PiloAstro(1),Eso-AdenoCA(1),Liver-HCC(1),Lung-SCC(1)
DISRUPTION	'AKR1C1	16	Liver-HCC(8),Breast-AdenoCA(2),Bone-Osteosarc(1),Lung-SCC(1),Ovary-AdenoCA(1),Panc-AdenoCA(1),Panc-Endocrine(1),Stomach-AdenoCA(1)
DISRUPTION	'AP000705.7	16	Liver-HCC(3),Breast-AdenoCA(2),Eso-AdenoCA(2),Ovary-AdenoCA(2),Bone-Osteosarc(1),Head-SCC(1),Kidney-RCC(1),Lung-SCC(1),Panc-AdenoCA(1),SoftTissue-Leiomyo(1),Stomach-AdenoCA(1)
DISRUPTION	'APBB2	16	Ovary-AdenoCA(3),Breast-AdenoCA(2),Liver-HCC(2),Skin-Melanoma(2),Bone-Epith(1),Bone-Osteosarc(1),CNS-GBM(1),Eso-AdenoCA(1),Lung-AdenoCA(1),Lung-SCC(1),Panc-AdenoCA(1)
DISRUPTION	'APP	16	Panc-AdenoCA(3),Skin-Melanoma(3),Breast-AdenoCA(2),Bladder-TCC(1),Eso-AdenoCA(1),Kidney-RCC(1),Liver-HCC(1),Lymph-BNHL(1),Ovary-AdenoCA(1),SoftTissue-Leiomyo(1),Stomach-AdenoCA(1)
DISRUPTION	'ASAP1	16	Bone-Osteosarc(2),Lung-SCC(2),Ovary-AdenoCA(2),Panc-AdenoCA(2),Prost-AdenoCA(2),Stomach-AdenoCA(2),Biliary-AdenoCA(1),Eso-AdenoCA(1),Liver-HCC(1),Uterus-AdenoCA(1)
DISRUPTION	'BBS9	16	Breast-AdenoCA(3),Ovary-AdenoCA(3),Stomach-AdenoCA(2),CNS-GBM(1),CNS-Medullo(1),ColoRect-AdenoCA(1),Eso-AdenoCA(1),Panc-AdenoCA(1),Prost-AdenoCA(1),Skin-Melanoma(1),SoftTissue-Liposarc(1)
DISRUPTION	'C2CD3	16	Breast-AdenoCA(8),Skin-Melanoma(5),Ovary-AdenoCA(2),Liver-HCC(1)
DISRUPTION	'CAPN5	16	Prost-AdenoCA(6),Skin-Melanoma(5),Breast-AdenoCA(4),Lung-SCC(1)
DISRUPTION	'CCDC102B	16	Head-SCC(2),Panc-AdenoCA(2),Skin-Melanoma(2),Breast-AdenoCA(1),CNS-GBM(1),Eso-AdenoCA(1),Kidney-RCC(1),Liver-HCC(1),Lung-SCC(1),Lymph-BNHL(1),Ovary-AdenoCA(1),Prost-AdenoCA(1),SoftTissue-Leiomyo(1)
DISRUPTION	'CDC73	16	Ovary-AdenoCA(5),Prost-AdenoCA(3),Liver-HCC(2),SoftTissue-Liposarc(2),Bladder-TCC(1),Bone-Osteosarc(1),Head-SCC(1),Skin-Melanoma(1)
DISRUPTION	'CHD7	16	Breast-AdenoCA(5),Liver-HCC(2),Ovary-AdenoCA(2),Skin-Melanoma(2),CNS-Medullo(1),Eso-AdenoCA(1),Lung-AdenoCA(1),Panc-AdenoCA(1),Prost-AdenoCA(1)
DISRUPTION	'CLSTN2	16	Breast-AdenoCA(3),Ovary-AdenoCA(3),Eso-AdenoCA(2),Prost-AdenoCA(2),Bladder-TCC(1),CNS-GBM(1),CNS-Oligo(1),Lung-SCC(1),Panc-Endocrine(1),SoftTissue-Liposarc(1)
DISRUPTION	'COL19A1	16	Liver-HCC(4),Breast-AdenoCA(2),Ovary-AdenoCA(2),SoftTissue-Liposarc(2),Eso-AdenoCA(1),Lung-SCC(1),Lymph-BNHL(1),Prost-AdenoCA(1),Skin-Melanoma(1),Uterus-AdenoCA(1)
DISRUPTION	'COL22A1	16	Liver-HCC(3),Prost-AdenoCA(3),Ovary-AdenoCA(2),Biliary-AdenoCA(1),Bone-Osteosarc(1),Breast-AdenoCA(1),Breast-LobularCA(1),Lung-AdenoCA(1),Lung-SCC(1),SoftTissue-Liposarc(1),Uterus-AdenoCA(1)
DISRUPTION	'CPSF6	16	SoftTissue-Liposarc(5),Eso-AdenoCA(4),Stomach-AdenoCA(2),Breast-AdenoCA(1),Lung-AdenoCA(1),Lung-SCC(1),Ovary-AdenoCA(1),Skin-Melanoma(1)
DISRUPTION	'CREB5	16	Panc-AdenoCA(3),CNS-GBM(2),Eso-AdenoCA(2),Skin-Melanoma(2),SoftTissue-Liposarc(2),Bone-Osteosarc(1),CNS-Medullo(1),Kidney-RCC(1),Lung-SCC(1),Ovary-AdenoCA(1)
DISRUPTION	'CTD-2066L21.3	16	Skin-Melanoma(4),Breast-AdenoCA(3),Prost-AdenoCA(3),SoftTissue-Liposarc(2),Bone-Osteosarc(1),CNS-GBM(1),Head-SCC(1),Panc-AdenoCA(1)
DISRUPTION	'CTD-2128A3.2	16	Prost-AdenoCA(14),Biliary-AdenoCA(1),Breast-AdenoCA(1)
DISRUPTION	'CTD-2307P3.1	16	Ovary-AdenoCA(4),Breast-AdenoCA(2),Lung-AdenoCA(2),Panc-AdenoCA(2),CNS-Medullo(1),Eso-AdenoCA(1),Head-SCC(1),Lung-SCC(1),Panc-Endocrine(1),Uterus-AdenoCA(1)
DISRUPTION	'DGKG	16	Breast-AdenoCA(4),Ovary-AdenoCA(4),Eso-AdenoCA(2),CNS-GBM(1),Liver-HCC(1),Lung-SCC(1),Prost-AdenoCA(1),Skin-Melanoma(1),Stomach-AdenoCA(1)
DISRUPTION	'DNM2	16	Eso-AdenoCA(3),Panc-AdenoCA(3),SoftTissue-Liposarc(3),Lymph-BNHL(2),Bone-Osteosarc(1),CNS-GBM(1),ColoRect-AdenoCA(1),Liver-HCC(1),Ovary-AdenoCA(1)
DISRUPTION	'DPY19L3	16	Stomach-AdenoCA(4),Ovary-AdenoCA(3),Panc-AdenoCA(3),Breast-AdenoCA(1),Lung-AdenoCA(1),Lung-SCC(1),Prost-AdenoCA(1),Skin-Melanoma(1),Uterus-AdenoCA(1)
DISRUPTION	'EPHA7	16	Breast-AdenoCA(3),Eso-AdenoCA(2),Prost-AdenoCA(2),Skin-Melanoma(2),Biliary-AdenoCA(1),Bladder-TCC(1),Kidney-ChRCC(1),Lymph-BNHL(1),Panc-AdenoCA(1),SoftTissue-Liposarc(1),Stomach-AdenoCA(1)
DISRUPTION	'ERICH1-AS1	16	Liver-HCC(5),Breast-AdenoCA(4),Prost-AdenoCA(2),SoftTissue-Liposarc(2),CNS-Medullo(1),Ovary-AdenoCA(1),Panc-AdenoCA(1)
DISRUPTION	'EYA3	16	Prost-AdenoCA(11),Breast-AdenoCA(2),Panc-AdenoCA(1),Skin-Melanoma(1),Stomach-AdenoCA(1)
DISRUPTION	'FGF14	16	Breast-AdenoCA(3),Liver-HCC(2),Prost-AdenoCA(2),Bladder-TCC(1),Eso-AdenoCA(1),Kidney-ChRCC(1),Lymph-BNHL(1),Panc-AdenoCA(1),Panc-Endocrine(1),Skin-Melanoma(1),SoftTissue-Liposarc(1),Stomach-AdenoCA(1)
DISRUPTION	'GAREM	16	Panc-AdenoCA(4),Ovary-AdenoCA(3),Stomach-AdenoCA(2),Breast-AdenoCA(1),Eso-AdenoCA(1),Liver-HCC(1),Lung-AdenoCA(1),Prost-AdenoCA(1),SoftTissue-Leiomyo(1),SoftTissue-Liposarc(1)
DISRUPTION	'GBE1	16	Breast-AdenoCA(3),Panc-AdenoCA(3),Prost-AdenoCA(2),Stomach-AdenoCA(2),Bone-Osteosarc(1),Liver-HCC(1),Lymph-BNHL(1),Ovary-AdenoCA(1),Skin-Melanoma(1),SoftTissue-Liposarc(1)
DISRUPTION	'GRIK4	16	Ovary-AdenoCA(5),Liver-HCC(3),Breast-AdenoCA(2),Eso-AdenoCA(2),CNS-Oligo(1),Lymph-BNHL(1),Prost-AdenoCA(1),Skin-Melanoma(1)
DISRUPTION	'HS6ST3	16	Liver-HCC(4),Breast-AdenoCA(3),Eso-AdenoCA(2),Prost-AdenoCA(2),Skin-Melanoma(2),Bladder-TCC(1),Lung-AdenoCA(1),Ovary-AdenoCA(1)
DISRUPTION	'INPP4B	16	Liver-HCC(3),Breast-AdenoCA(2),Ovary-AdenoCA(2),Skin-Melanoma(2),Bladder-TCC(1),CNS-Medullo(1),ColoRect-AdenoCA(1),Eso-AdenoCA(1),Panc-AdenoCA(1),Stomach-AdenoCA(1),Uterus-AdenoCA(1)
DISRUPTION	'ISPD	16	Breast-AdenoCA(3),Ovary-AdenoCA(3),Liver-HCC(2),Skin-Melanoma(2),Biliary-AdenoCA(1),Head-SCC(1),Lung-SCC(1),Lymph-BNHL(1),Panc-AdenoCA(1),SoftTissue-Liposarc(1)
DISRUPTION	'KANSL1	16	Breast-AdenoCA(4),Panc-AdenoCA(3),Eso-AdenoCA(2),Prost-AdenoCA(2),Liver-HCC(1),Lymph-CLL(1),Skin-Melanoma(1),Stomach-AdenoCA(1),Uterus-AdenoCA(1)
DISRUPTION	'KCNH8	16	Prost-AdenoCA(6),Liver-HCC(2),Ovary-AdenoCA(2),Skin-Melanoma(2),Eso-AdenoCA(1),Panc-AdenoCA(1),SoftTissue-Liposarc(1),Stomach-AdenoCA(1)
DISRUPTION	'KIF21A	16	Breast-AdenoCA(2),Liver-HCC(2),Ovary-AdenoCA(2),Panc-AdenoCA(2),Skin-Melanoma(2),CNS-GBM(1),ColoRect-AdenoCA(1),Eso-AdenoCA(1),Lung-AdenoCA(1),Lung-SCC(1),SoftTissue-Liposarc(1)
DISRUPTION	'KLHL29	16	Prost-AdenoCA(6),Breast-AdenoCA(4),Panc-AdenoCA(2),Bone-Osteosarc(1),CNS-Medullo(1),Eso-AdenoCA(1),Lung-SCC(1)
DISRUPTION	'KYNU	16	Prost-AdenoCA(4),Lymph-BNHL(2),Skin-Melanoma(2),Breast-AdenoCA(1),Eso-AdenoCA(1),Kidney-RCC(1),Liver-HCC(1),Lung-SCC(1),Ovary-AdenoCA(1),Panc-AdenoCA(1),SoftTissue-Liposarc(1)
DISRUPTION	'LACE1	16	Prost-AdenoCA(5),Breast-AdenoCA(4),Ovary-AdenoCA(2),Bladder-TCC(1),Bone-Benign(1),ColoRect-AdenoCA(1),Lung-SCC(1),Skin-Melanoma(1)
DISRUPTION	'LAMA2	16	Prost-AdenoCA(3),Skin-Melanoma(3),Breast-AdenoCA(2),Liver-HCC(2),Bladder-TCC(1),ColoRect-AdenoCA(1),Eso-AdenoCA(1),Ovary-AdenoCA(1),Panc-AdenoCA(1),SoftTissue-Liposarc(1)
DISRUPTION	'LDLRAD3	16	Breast-AdenoCA(4),Bone-Osteosarc(2),Lung-SCC(2),Head-SCC(1),Liver-HCC(1),Lung-AdenoCA(1),Ovary-AdenoCA(1),Prost-AdenoCA(1),Skin-Melanoma(1),SoftTissue-Leiomyo(1),Stomach-AdenoCA(1)
DISRUPTION	'LINC00298	16	Prost-AdenoCA(7),Eso-AdenoCA(2),Skin-Melanoma(2),Breast-AdenoCA(1),Liver-HCC(1),Lung-SCC(1),Ovary-AdenoCA(1),Panc-AdenoCA(1)
DISRUPTION	'LINC00511	16	Eso-AdenoCA(3),Breast-AdenoCA(2),CNS-GBM(2),Panc-AdenoCA(2),Bladder-TCC(1),Bone-Osteosarc(1),CNS-Medullo(1),Lung-AdenoCA(1),Lymph-CLL(1),Prost-AdenoCA(1),Uterus-AdenoCA(1)
DISRUPTION	'LRRIQ1	16	SoftTissue-Liposarc(8),Prost-AdenoCA(3),CNS-Medullo(1),Eso-AdenoCA(1),Panc-AdenoCA(1),Skin-Melanoma(1),Stomach-AdenoCA(1)
DISRUPTION	'MALRD1	16	Ovary-AdenoCA(3),Breast-AdenoCA(2),ColoRect-AdenoCA(2),Bone-Osteosarc(1),Eso-AdenoCA(1),Head-SCC(1),Lung-AdenoCA(1),Panc-AdenoCA(1),Skin-Melanoma(1),SoftTissue-Leiomyo(1),SoftTissue-Liposarc(1),Stomach-AdenoCA(1)
DISRUPTION	'MDM1	16	SoftTissue-Liposarc(6),Breast-AdenoCA(2),Eso-AdenoCA(2),Stomach-AdenoCA(2),Bladder-TCC(1),CNS-GBM(1),Ovary-AdenoCA(1),Skin-Melanoma(1)
DISRUPTION	'NHSL1	16	Breast-AdenoCA(5),SoftTissue-Liposarc(3),Ovary-AdenoCA(2),Eso-AdenoCA(1),Panc-AdenoCA(1),Panc-Endocrine(1),Prost-AdenoCA(1),Skin-Melanoma(1),Uterus-AdenoCA(1)
DISRUPTION	'NUBPL	16	Breast-AdenoCA(6),Liver-HCC(3),Ovary-AdenoCA(3),Biliary-AdenoCA(1),Panc-AdenoCA(1),Skin-Melanoma(1),Uterus-AdenoCA(1)
DISRUPTION	'OSBP2	16	Panc-AdenoCA(5),Breast-AdenoCA(2),Lung-AdenoCA(2),Ovary-AdenoCA(2),Skin-Melanoma(2),CNS-Medullo(1),Eso-AdenoCA(1),Head-SCC(1)
DISRUPTION	'PCDH7	16	Ovary-AdenoCA(5),Skin-Melanoma(3),Liver-HCC(2),SoftTissue-Liposarc(2),Bladder-TCC(1),Lymph-BNHL(1),Panc-AdenoCA(1),Prost-AdenoCA(1)
DISRUPTION	'PCLO	16	Prost-AdenoCA(4),ColoRect-AdenoCA(2),Eso-AdenoCA(2),Panc-AdenoCA(2),Bladder-TCC(1),Bone-Osteosarc(1),Breast-AdenoCA(1),Lung-AdenoCA(1),Lung-SCC(1),Lymph-BNHL(1)
DISRUPTION	'PKIA	16	Prost-AdenoCA(9),Breast-AdenoCA(2),Biliary-AdenoCA(1),ColoRect-AdenoCA(1),Liver-HCC(1),Lung-SCC(1),Ovary-AdenoCA(1)
DISRUPTION	'PTPRJ	16	Prost-AdenoCA(5),Breast-AdenoCA(3),Liver-HCC(3),Lymph-BNHL(2),Eso-AdenoCA(1),SoftTissue-Liposarc(1),Uterus-AdenoCA(1)
DISRUPTION	'RFX3	16	Skin-Melanoma(4),Biliary-AdenoCA(3),Eso-AdenoCA(3),Breast-AdenoCA(2),Stomach-AdenoCA(2),Lymph-BNHL(1),Prost-AdenoCA(1)
DISRUPTION	'RP1-15D23.2	16	Breast-AdenoCA(3),SoftTissue-Liposarc(3),Bone-Osteosarc(2),Biliary-AdenoCA(1),Bladder-TCC(1),Liver-HCC(1),Lung-SCC(1),Ovary-AdenoCA(1),Prost-AdenoCA(1),Skin-Melanoma(1),Stomach-AdenoCA(1)
DISRUPTION	'RP1-209A6.1	16	Breast-AdenoCA(3),Ovary-AdenoCA(3),Panc-AdenoCA(2),Prost-AdenoCA(2),Biliary-AdenoCA(1),Bone-Benign(1),Liver-HCC(1),Skin-Melanoma(1),SoftTissue-Leiomyo(1),SoftTissue-Liposarc(1)
DISRUPTION	'RP11-1084E5.1	16	Prost-AdenoCA(4),Eso-AdenoCA(2),Uterus-AdenoCA(2),Bladder-TCC(1),Bone-Osteosarc(1),Breast-AdenoCA(1),ColoRect-AdenoCA(1),Panc-AdenoCA(1),Panc-Endocrine(1),SoftTissue-Liposarc(1),Stomach-AdenoCA(1)
DISRUPTION	'RP11-114G22.1	16	Breast-AdenoCA(3),Eso-AdenoCA(2),Lung-SCC(2),Prost-AdenoCA(2),Bladder-TCC(1),Bone-Osteosarc(1),Liver-HCC(1),Panc-AdenoCA(1),Skin-Melanoma(1),SoftTissue-Leiomyo(1),SoftTissue-Liposarc(1)
DISRUPTION	'RP11-170M17.1	16	Prost-AdenoCA(5),Panc-AdenoCA(3),Eso-AdenoCA(2),Breast-AdenoCA(1),ColoRect-AdenoCA(1),Head-SCC(1),Liver-HCC(1),Ovary-AdenoCA(1),Stomach-AdenoCA(1)
DISRUPTION	'RP11-266O8.1	16	Prost-AdenoCA(9),Ovary-AdenoCA(2),Skin-Melanoma(2),Bone-Osteosarc(1),Breast-AdenoCA(1),Lung-SCC(1)
DISRUPTION	'RP11-383H13.1	16	Breast-AdenoCA(3),Ovary-AdenoCA(2),Panc-AdenoCA(2),Prost-AdenoCA(2),Skin-Melanoma(2),CNS-Medullo(1),Lung-AdenoCA(1),Lung-SCC(1),SoftTissue-Liposarc(1),Uterus-AdenoCA(1)
DISRUPTION	'RP11-556I14.2	16	Prost-AdenoCA(13),Bone-Benign(1),Ovary-AdenoCA(1),Panc-AdenoCA(1)
DISRUPTION	'RP11-588H23.3	16	SoftTissue-Liposarc(6),Breast-AdenoCA(3),Skin-Melanoma(2),Bone-Osteosarc(1),CNS-GBM(1),Liver-HCC(1),Lung-AdenoCA(1),Prost-AdenoCA(1)
DISRUPTION	'SCFD2	16	Panc-AdenoCA(3),Breast-AdenoCA(2),Prost-AdenoCA(2),Breast-LobularCA(1),CNS-GBM(1),CNS-Oligo(1),Eso-AdenoCA(1),Liver-HCC(1),Lung-SCC(1),Lymph-BNHL(1),Ovary-AdenoCA(1),Skin-Melanoma(1)
DISRUPTION	'SCN8A	16	Breast-AdenoCA(3),SoftTissue-Liposarc(3),Ovary-AdenoCA(2),Skin-Melanoma(2),Bone-Osteosarc(1),Breast-LobularCA(1),CNS-GBM(1),Eso-AdenoCA(1),Liver-HCC(1),Prost-AdenoCA(1)
DISRUPTION	'SDK2	16	Breast-AdenoCA(5),Liver-HCC(3),Panc-AdenoCA(2),Uterus-AdenoCA(2),Eso-AdenoCA(1),Lung-SCC(1),Ovary-AdenoCA(1),Stomach-AdenoCA(1)
DISRUPTION	'SLC25A13	16	Prost-AdenoCA(4),Breast-AdenoCA(2),ColoRect-AdenoCA(1),Eso-AdenoCA(1),Head-SCC(1),Lung-AdenoCA(1),Lung-SCC(1),Panc-Endocrine(1),Skin-Melanoma(1),SoftTissue-Leiomyo(1),Stomach-AdenoCA(1),Uterus-AdenoCA(1)
DISRUPTION	'SLC4A4	16	Liver-HCC(3),Bladder-TCC(2),Eso-AdenoCA(2),Panc-AdenoCA(2),Prost-AdenoCA(2),Biliary-AdenoCA(1),Bone-Osteosarc(1),Ovary-AdenoCA(1),Stomach-AdenoCA(1),Uterus-AdenoCA(1)
DISRUPTION	'SLC8A1	16	Prost-AdenoCA(4),Ovary-AdenoCA(3),Eso-AdenoCA(2),Skin-Melanoma(2),Breast-AdenoCA(1),Liver-HCC(1),Lung-AdenoCA(1),Lung-SCC(1),Uterus-AdenoCA(1)
DISRUPTION	'SLIT3	16	Prost-AdenoCA(5),Stomach-AdenoCA(2),Bone-Epith(1),Breast-AdenoCA(1),CNS-Medullo(1),Kidney-RCC(1),Liver-HCC(1),Ovary-AdenoCA(1),Panc-AdenoCA(1),Skin-Melanoma(1),SoftTissue-Liposarc(1)
DISRUPTION	'SOX6	16	Breast-AdenoCA(3),Panc-AdenoCA(2),Skin-Melanoma(2),SoftTissue-Liposarc(2),Bladder-TCC(1),Bone-Osteosarc(1),Head-SCC(1),Liver-HCC(1),Ovary-AdenoCA(1),Panc-Endocrine(1),Uterus-AdenoCA(1)
DISRUPTION	'SPATA6	16	Prost-AdenoCA(6),Breast-AdenoCA(3),Ovary-AdenoCA(2),Skin-Melanoma(2),Bone-Osteosarc(1),ColoRect-AdenoCA(1),Stomach-AdenoCA(1)
DISRUPTION	'SPTA1	16	Prost-AdenoCA(10),Ovary-AdenoCA(2),SoftTissue-Liposarc(2),Biliary-AdenoCA(1),Breast-AdenoCA(1)
DISRUPTION	'SSH2	16	Panc-AdenoCA(3),Breast-AdenoCA(2),CNS-Medullo(2),Biliary-AdenoCA(1),Bladder-TCC(1),Bone-Osteosarc(1),ColoRect-AdenoCA(1),Kidney-RCC(1),Liver-HCC(1),Ovary-AdenoCA(1),Skin-Melanoma(1),SoftTissue-Liposarc(1)
DISRUPTION	'TACC1	16	Breast-AdenoCA(6),Eso-AdenoCA(2),Prost-AdenoCA(2),SoftTissue-Liposarc(2),Bone-Osteosarc(1),Liver-HCC(1),Ovary-AdenoCA(1),Uterus-AdenoCA(1)
DISRUPTION	'TBCK	16	Prost-AdenoCA(9),Liver-HCC(2),Skin-Melanoma(2),Breast-AdenoCA(1),Eso-AdenoCA(1),Ovary-AdenoCA(1)
DISRUPTION	'TGS1	16	Prost-AdenoCA(11),Bladder-TCC(1),Breast-AdenoCA(1),ColoRect-AdenoCA(1),Kidney-RCC(1),Ovary-AdenoCA(1)
DISRUPTION	'THRB	16	Prost-AdenoCA(4),Ovary-AdenoCA(3),Breast-AdenoCA(2),Kidney-ChRCC(1),Liver-HCC(1),Panc-Endocrine(1),Skin-Melanoma(1),SoftTissue-Liposarc(1),Stomach-AdenoCA(1),Uterus-AdenoCA(1)
DISRUPTION	'TMEM232	16	Bone-Osteosarc(3),Skin-Melanoma(3),Kidney-RCC(2),Stomach-AdenoCA(2),Breast-AdenoCA(1),Eso-AdenoCA(1),Liver-HCC(1),Lung-SCC(1),Lymph-BNHL(1),Prost-AdenoCA(1)
DISRUPTION	'TTC39C	16	Panc-AdenoCA(7),Eso-AdenoCA(5),Stomach-AdenoCA(2),Lung-SCC(1),Skin-Melanoma(1)
DISRUPTION	'UBAP2	16	Panc-AdenoCA(4),Breast-AdenoCA(2),Liver-HCC(2),Biliary-AdenoCA(1),Bone-Osteosarc(1),CNS-GBM(1),Head-SCC(1),Lung-AdenoCA(1),Lung-SCC(1),Ovary-AdenoCA(1),Stomach-AdenoCA(1)
DISRUPTION	'USP48	16	Eso-AdenoCA(3),Ovary-AdenoCA(3),Stomach-AdenoCA(3),Skin-Melanoma(2),Biliary-AdenoCA(1),Breast-AdenoCA(1),Liver-HCC(1),Prost-AdenoCA(1),Uterus-AdenoCA(1)
DISRUPTION	'VPS13D	16	Ovary-AdenoCA(4),Liver-HCC(3),Breast-AdenoCA(2),Panc-AdenoCA(2),Uterus-AdenoCA(2),Eso-AdenoCA(1),Lung-SCC(1),Stomach-AdenoCA(1)
EXON_SKIP	'KHDRBS2	16	Liver-HCC(2),Lung-SCC(2),Panc-AdenoCA(2),Prost-AdenoCA(2),Biliary-AdenoCA(1),Bone-Osteosarc(1),Head-SCC(1),Lymph-BNHL(1),Lymph-CLL(1),Ovary-AdenoCA(1),Skin-Melanoma(1),Stomach-AdenoCA(1)
EXON_SKIP	'MECOM	16	Eso-AdenoCA(3),Breast-AdenoCA(2),ColoRect-AdenoCA(2),Ovary-AdenoCA(2),Skin-Melanoma(2),Stomach-AdenoCA(2),Lung-SCC(1),Prost-AdenoCA(1),Uterus-AdenoCA(1)
EXON_SKIP	'MGAT4C	16	Prost-AdenoCA(8),SoftTissue-Liposarc(2),Bladder-TCC(1),CNS-GBM(1),Liver-HCC(1),Lymph-BNHL(1),Ovary-AdenoCA(1),Panc-Endocrine(1)
EXON_SKIP	'NF1	16	Ovary-AdenoCA(6),Breast-AdenoCA(2),Liver-HCC(2),SoftTissue-Liposarc(2),Cervix-SCC(1),Eso-AdenoCA(1),Lung-AdenoCA(1),Panc-AdenoCA(1)
EXON_SKIP	'PTPRG	16	Liver-HCC(5),Head-SCC(2),Ovary-AdenoCA(2),Stomach-AdenoCA(2),Breast-AdenoCA(1),Panc-AdenoCA(1),Prost-AdenoCA(1),Skin-Melanoma(1),Uterus-AdenoCA(1)
EXON_SKIP	'ULK4	16	Liver-HCC(3),Bone-Osteosarc(2),ColoRect-AdenoCA(2),Ovary-AdenoCA(2),Stomach-AdenoCA(2),Cervix-SCC(1),Eso-AdenoCA(1),Head-SCC(1),SoftTissue-Liposarc(1),Uterus-AdenoCA(1)
ITD	'CSMD1	16	Prost-AdenoCA(5),Breast-AdenoCA(3),Ovary-AdenoCA(2),Biliary-AdenoCA(1),CNS-GBM(1),Head-SCC(1),Lung-AdenoCA(1),Lymph-BNHL(1),Stomach-AdenoCA(1)
ITD	'EYS	16	Prost-AdenoCA(4),Stomach-AdenoCA(3),Breast-AdenoCA(2),Liver-HCC(2),Bone-Osteosarc(1),Ovary-AdenoCA(1),Panc-AdenoCA(1),Skin-Melanoma(1),Uterus-AdenoCA(1)
ITD	'PARD3B	16	Breast-AdenoCA(5),Eso-AdenoCA(5),Lung-SCC(2),Panc-AdenoCA(2),ColoRect-AdenoCA(1),Ovary-AdenoCA(1)
ITD	'RB1	16	Breast-AdenoCA(8),Ovary-AdenoCA(5),Liver-HCC(2),Uterus-AdenoCA(1)
FUSION_5	'AC007682.1	16	Prost-AdenoCA(4),Eso-AdenoCA(3),Lung-SCC(3),Stomach-AdenoCA(2),Breast-AdenoCA(1),Liver-HCC(1),Panc-AdenoCA(1),Panc-Endocrine(1)
FUSION_5	'ANKFN1	16	Breast-AdenoCA(9),Bladder-TCC(2),Biliary-AdenoCA(1),Bone-Osteosarc(1),ColoRect-AdenoCA(1),Liver-HCC(1),Skin-Melanoma(1)
FUSION_5	'CCDC26	16	Panc-AdenoCA(6),Skin-Melanoma(4),Breast-AdenoCA(2),Ovary-AdenoCA(1),Panc-Endocrine(1),Prost-AdenoCA(1),Stomach-AdenoCA(1)
FUSION_5	'CELSR1	16	Prost-AdenoCA(8),Liver-HCC(2),Panc-Endocrine(2),Breast-AdenoCA(1),Head-SCC(1),Ovary-AdenoCA(1),Uterus-AdenoCA(1)
FUSION_5	'CNOT2	16	SoftTissue-Liposarc(8),Skin-Melanoma(5),Breast-AdenoCA(2),Eso-AdenoCA(1)
FUSION_5	'DNM2	16	SoftTissue-Liposarc(4),Bone-Osteosarc(2),Ovary-AdenoCA(2),Panc-AdenoCA(2),Breast-AdenoCA(1),Eso-AdenoCA(1),Lung-SCC(1),Prost-AdenoCA(1),Stomach-AdenoCA(1),Uterus-AdenoCA(1)
FUSION_5	'GOPC	16	Prost-AdenoCA(10),Bone-Osteosarc(2),Panc-AdenoCA(2),Biliary-AdenoCA(1),Breast-AdenoCA(1)
FUSION_5	'IGHD2-2	16	Lymph-BNHL(10),Lymph-CLL(6)
FUSION_5	'IGKV1-5	16	Lymph-BNHL(9),Lymph-CLL(7)
FUSION_5	'IKZF3	16	Stomach-AdenoCA(5),Breast-AdenoCA(3),Bladder-TCC(2),Eso-AdenoCA(2),Panc-AdenoCA(2),Head-SCC(1),Lung-SCC(1)
FUSION_5	'LARGE	16	Ovary-AdenoCA(4),Bladder-TCC(3),Panc-AdenoCA(3),Bone-Osteosarc(2),Liver-HCC(2),Breast-AdenoCA(1),Stomach-AdenoCA(1)
FUSION_5	'MDM1	16	SoftTissue-Liposarc(7),CNS-GBM(2),Breast-AdenoCA(1),Eso-AdenoCA(1),Head-SCC(1),Lung-AdenoCA(1),Ovary-AdenoCA(1),Prost-AdenoCA(1),Skin-Melanoma(1)
FUSION_5	'PCLO	16	Prost-AdenoCA(8),Eso-AdenoCA(3),Bone-Osteosarc(1),Breast-AdenoCA(1),Lung-SCC(1),Ovary-AdenoCA(1),Panc-AdenoCA(1)
FUSION_5	'PITPNC1	16	Breast-AdenoCA(4),Eso-AdenoCA(4),Skin-Melanoma(2),SoftTissue-Liposarc(2),Uterus-AdenoCA(2),Liver-HCC(1),Panc-AdenoCA(1)
FUSION_5	'POLD3	16	Skin-Melanoma(4),Breast-AdenoCA(2),Eso-AdenoCA(2),Ovary-AdenoCA(2),Panc-AdenoCA(2),Stomach-AdenoCA(2),Head-SCC(1),Uterus-AdenoCA(1)
FUSION_5	'PTPRG	16	Prost-AdenoCA(10),Kidney-ChRCC(2),Lung-AdenoCA(1),Ovary-AdenoCA(1),Skin-Melanoma(1),Uterus-AdenoCA(1)
FUSION_5	'PXDNL	16	Skin-Melanoma(5),Panc-AdenoCA(4),Breast-AdenoCA(3),Biliary-AdenoCA(1),Lymph-BNHL(1),Prost-AdenoCA(1),Stomach-AdenoCA(1)
FUSION_5	'RBFOX1	16	Breast-AdenoCA(7),CNS-GBM(2),Ovary-AdenoCA(2),Panc-AdenoCA(2),Eso-AdenoCA(1),Liver-HCC(1),Skin-Melanoma(1)
FUSION_5	'RIMS2	16	Liver-HCC(4),Prost-AdenoCA(3),Breast-AdenoCA(2),Lung-AdenoCA(2),Panc-AdenoCA(2),Ovary-AdenoCA(1),SoftTissue-Leiomyo(1),Stomach-AdenoCA(1)
FUSION_5	'RP11-1252I4.2	16	Liver-HCC(15),Ovary-AdenoCA(1)
FUSION_5	'RP11-449D8.5	16	Panc-AdenoCA(8),Breast-AdenoCA(2),Biliary-AdenoCA(1),ColoRect-AdenoCA(1),Eso-AdenoCA(1),Head-SCC(1),Lung-AdenoCA(1),Skin-Melanoma(1)
FUSION_5	'WIPF2	16	Eso-AdenoCA(5),Breast-AdenoCA(3),Bone-Osteosarc(2),Stomach-AdenoCA(2),ColoRect-AdenoCA(1),Head-SCC(1),Kidney-RCC(1),Uterus-AdenoCA(1)
FUSION_5	'ZFPM2	16	Prost-AdenoCA(9),Breast-AdenoCA(2),Liver-HCC(2),Bladder-TCC(1),Eso-AdenoCA(1),SoftTissue-Liposarc(1)
FUSION_3	'ACACA	16	Breast-AdenoCA(5),Eso-AdenoCA(2),Panc-AdenoCA(2),Skin-Melanoma(2),Stomach-AdenoCA(2),Bladder-TCC(1),Head-SCC(1),Ovary-AdenoCA(1)
FUSION_3	'ADK	16	Ovary-AdenoCA(3),Breast-AdenoCA(2),Stomach-AdenoCA(2),Uterus-AdenoCA(2),Bone-Osteosarc(1),Eso-AdenoCA(1),Liver-HCC(1),Lung-AdenoCA(1),Lung-SCC(1),Lymph-BNHL(1),SoftTissue-Leiomyo(1)
FUSION_3	'ANK1	16	Prost-AdenoCA(7),Breast-AdenoCA(4),Breast-LobularCA(1),Eso-AdenoCA(1),Liver-HCC(1),Lung-SCC(1),Skin-Melanoma(1)
FUSION_3	'ANK3	16	Breast-AdenoCA(4),Prost-AdenoCA(3),Uterus-AdenoCA(3),Biliary-AdenoCA(1),Bone-Osteosarc(1),Eso-AdenoCA(1),Lung-SCC(1),Lymph-BNHL(1),Ovary-AdenoCA(1)
FUSION_3	'ANO1	16	Skin-Melanoma(7),Breast-AdenoCA(3),Eso-AdenoCA(2),Lung-SCC(2),Panc-AdenoCA(1),Prost-AdenoCA(1)
FUSION_3	'CACNA1C	16	Breast-AdenoCA(3),Eso-AdenoCA(3),Skin-Melanoma(3),SoftTissue-Liposarc(3),Biliary-AdenoCA(1),Ovary-AdenoCA(1),Panc-AdenoCA(1),SoftTissue-Leiomyo(1)
FUSION_3	'CADPS2	16	SoftTissue-Liposarc(6),Bone-Osteosarc(2),Eso-AdenoCA(2),Bone-Epith(1),Liver-HCC(1),Lung-SCC(1),Panc-AdenoCA(1),Skin-Melanoma(1),Stomach-AdenoCA(1)
FUSION_3	'DCC	16	Panc-AdenoCA(11),Liver-HCC(3),Lung-AdenoCA(1),Skin-Melanoma(1)
FUSION_3	'DEPTOR	16	Ovary-AdenoCA(7),Breast-AdenoCA(3),Panc-AdenoCA(2),Eso-AdenoCA(1),Prost-AdenoCA(1),SoftTissue-Liposarc(1),Uterus-AdenoCA(1)
FUSION_3	'DISC1FP1	16	Breast-AdenoCA(3),Prost-AdenoCA(3),Skin-Melanoma(3),SoftTissue-Liposarc(3),Biliary-AdenoCA(1),Bone-Osteosarc(1),Lung-SCC(1),Panc-Endocrine(1)
FUSION_3	'DNAH9	16	Skin-Melanoma(6),Breast-AdenoCA(2),Liver-HCC(2),Prost-AdenoCA(2),Biliary-AdenoCA(1),Bladder-TCC(1),Lymph-CLL(1),SoftTissue-Liposarc(1)
FUSION_3	'ERBB4	16	Bone-Osteosarc(2),Eso-AdenoCA(2),Lung-SCC(2),Panc-AdenoCA(2),Stomach-AdenoCA(2),Breast-AdenoCA(1),CNS-Medullo(1),Kidney-RCC(1),Lung-AdenoCA(1),Ovary-AdenoCA(1),Uterus-AdenoCA(1)
FUSION_3	'FAF1	16	Breast-AdenoCA(3),SoftTissue-Liposarc(3),Biliary-AdenoCA(2),Panc-AdenoCA(2),Prost-AdenoCA(2),Eso-AdenoCA(1),Liver-HCC(1),Lung-SCC(1),Panc-Endocrine(1)
FUSION_3	'GPHN	16	Panc-AdenoCA(6),Liver-HCC(2),Biliary-AdenoCA(1),Bladder-TCC(1),Breast-AdenoCA(1),ColoRect-AdenoCA(1),Lymph-BNHL(1),Prost-AdenoCA(1),Skin-Melanoma(1),Uterus-AdenoCA(1)
FUSION_3	'GRID1	16	Prost-AdenoCA(7),Ovary-AdenoCA(3),Breast-AdenoCA(2),ColoRect-AdenoCA(1),Panc-AdenoCA(1),Skin-Melanoma(1),Uterus-AdenoCA(1)
FUSION_3	'LMCD1-AS1	16	Ovary-AdenoCA(5),SoftTissue-Liposarc(4),Panc-AdenoCA(2),Eso-AdenoCA(1),Liver-HCC(1),Prost-AdenoCA(1),Stomach-AdenoCA(1),Uterus-AdenoCA(1)
FUSION_3	'LRBA	16	Ovary-AdenoCA(4),Skin-Melanoma(4),Breast-AdenoCA(2),Eso-AdenoCA(2),Prost-AdenoCA(2),Biliary-AdenoCA(1),Stomach-AdenoCA(1)
FUSION_3	'ME3	16	Skin-Melanoma(8),Ovary-AdenoCA(3),Bone-Osteosarc(1),Breast-AdenoCA(1),Eso-AdenoCA(1),Head-SCC(1),Kidney-RCC(1)
FUSION_3	'MSRB3	16	Prost-AdenoCA(4),SoftTissue-Liposarc(3),Bone-Osteosarc(2),Breast-AdenoCA(2),Eso-AdenoCA(2),Skin-Melanoma(2),Panc-AdenoCA(1)
FUSION_3	'MYO1D	16	Stomach-AdenoCA(4),Breast-AdenoCA(3),Prost-AdenoCA(3),ColoRect-AdenoCA(1),Eso-AdenoCA(1),Liver-HCC(1),Lung-SCC(1),Panc-AdenoCA(1),SoftTissue-Liposarc(1)
FUSION_3	'NRXN3	16	Panc-AdenoCA(4),Ovary-AdenoCA(2),Prost-AdenoCA(2),Skin-Melanoma(2),Biliary-AdenoCA(1),Bone-Osteosarc(1),Breast-AdenoCA(1),CNS-Oligo(1),Eso-AdenoCA(1),SoftTissue-Liposarc(1)
FUSION_3	'PDGFD	16	Bone-Osteosarc(6),Skin-Melanoma(5),Biliary-AdenoCA(1),Breast-AdenoCA(1),CNS-GBM(1),ColoRect-AdenoCA(1),Lymph-BNHL(1)
FUSION_3	'RP11-141M1.3	16	Prost-AdenoCA(6),Eso-AdenoCA(3),Skin-Melanoma(3),Breast-AdenoCA(1),Liver-HCC(1),Ovary-AdenoCA(1),Stomach-AdenoCA(1)
FUSION_3	'RP11-81H14.2	16	SoftTissue-Liposarc(8),Breast-AdenoCA(2),CNS-GBM(2),Eso-AdenoCA(1),Head-SCC(1),Lung-AdenoCA(1),Ovary-AdenoCA(1)
FUSION_3	'SDK1	16	Breast-AdenoCA(4),Prost-AdenoCA(3),Skin-Melanoma(3),Bone-Osteosarc(1),CNS-GBM(1),Kidney-RCC(1),Lymph-BNHL(1),Ovary-AdenoCA(1),Panc-AdenoCA(1)
FUSION_3	'SSH2	16	Breast-AdenoCA(6),Ovary-AdenoCA(3),Panc-AdenoCA(2),Bone-Osteosarc(1),CNS-Medullo(1),Liver-HCC(1),Skin-Melanoma(1),Uterus-AdenoCA(1)
FUSION_3	'STAG1	16	Breast-AdenoCA(4),Ovary-AdenoCA(3),Prost-AdenoCA(3),Eso-AdenoCA(1),Head-SCC(1),Lymph-BNHL(1),Panc-AdenoCA(1),SoftTissue-Leiomyo(1),Uterus-AdenoCA(1)
FUSION_3	'THSD4	16	Uterus-AdenoCA(4),Breast-AdenoCA(3),Ovary-AdenoCA(2),Panc-AdenoCA(2),Bone-Osteosarc(1),CNS-GBM(1),Eso-AdenoCA(1),Skin-Melanoma(1),SoftTissue-Liposarc(1)
FUSION_3	'VTI1A	16	Prost-AdenoCA(5),Ovary-AdenoCA(4),Bone-Osteosarc(2),Breast-LobularCA(1),Liver-HCC(1),Panc-AdenoCA(1),SoftTissue-Liposarc(1),Stomach-AdenoCA(1)
FUSION_3	'ZMAT4	16	Breast-AdenoCA(3),ColoRect-AdenoCA(2),Ovary-AdenoCA(2),Panc-AdenoCA(2),SoftTissue-Leiomyo(2),Uterus-AdenoCA(2),Eso-AdenoCA(1),Lung-AdenoCA(1),Lung-SCC(1)
DISRUPTION	'AC005616.1	15	Breast-AdenoCA(3),Ovary-AdenoCA(2),SoftTissue-Liposarc(2),Uterus-AdenoCA(2),Bone-Osteosarc(1),Eso-AdenoCA(1),Liver-HCC(1),Lung-AdenoCA(1),Prost-AdenoCA(1),Stomach-AdenoCA(1)
DISRUPTION	'AC092684.1	15	Liver-HCC(4),Ovary-AdenoCA(2),Prost-AdenoCA(2),Bone-Osteosarc(1),Breast-AdenoCA(1),Eso-AdenoCA(1),Head-SCC(1),Lung-SCC(1),SoftTissue-Liposarc(1),Uterus-AdenoCA(1)
DISRUPTION	'AC104820.2	15	Prost-AdenoCA(4),Bladder-TCC(2),Breast-AdenoCA(2),SoftTissue-Leiomyo(2),CNS-GBM(1),Liver-HCC(1),Lung-SCC(1),Ovary-AdenoCA(1),Panc-Endocrine(1)
DISRUPTION	'ACSL3	15	Prost-AdenoCA(6),Stomach-AdenoCA(4),Breast-AdenoCA(2),Panc-AdenoCA(2),Liver-HCC(1)
DISRUPTION	'ADARB2	15	Breast-AdenoCA(4),SoftTissue-Liposarc(3),Liver-HCC(2),Prost-AdenoCA(2),Lung-SCC(1),Ovary-AdenoCA(1),Panc-AdenoCA(1),Stomach-AdenoCA(1)
DISRUPTION	'ADK	15	Ovary-AdenoCA(4),Breast-AdenoCA(3),Stomach-AdenoCA(2),Uterus-AdenoCA(2),Bone-Osteosarc(1),Head-SCC(1),Liver-HCC(1),Prost-AdenoCA(1)
DISRUPTION	'AGO3	15	Prost-AdenoCA(4),Breast-AdenoCA(2),Liver-HCC(2),Ovary-AdenoCA(2),Uterus-AdenoCA(2),Lung-SCC(1),Panc-AdenoCA(1),SoftTissue-Liposarc(1)
DISRUPTION	'AHRR	15	SoftTissue-Liposarc(6),Skin-Melanoma(3),Ovary-AdenoCA(2),Bone-Osteosarc(1),Breast-AdenoCA(1),Liver-HCC(1),Stomach-AdenoCA(1)
DISRUPTION	'AKAP10	15	Panc-AdenoCA(3),Prost-AdenoCA(3),Bladder-TCC(2),Bone-Osteosarc(1),Breast-AdenoCA(1),Cervix-SCC(1),Eso-AdenoCA(1),Lung-SCC(1),Ovary-AdenoCA(1),Skin-Melanoma(1)
DISRUPTION	'ANK2	15	Ovary-AdenoCA(3),Liver-HCC(2),Prost-AdenoCA(2),Breast-AdenoCA(1),ColoRect-AdenoCA(1),Kidney-ChRCC(1),Lung-AdenoCA(1),Lung-SCC(1),Panc-AdenoCA(1),SoftTissue-Liposarc(1),Stomach-AdenoCA(1)
DISRUPTION	'ANKH	15	Prost-AdenoCA(6),Liver-HCC(2),Ovary-AdenoCA(2),Skin-Melanoma(2),Bone-Osteosarc(1),Panc-AdenoCA(1),SoftTissue-Liposarc(1)
DISRUPTION	'ANO3	15	Breast-AdenoCA(5),SoftTissue-Liposarc(3),Bone-Osteosarc(1),Lung-AdenoCA(1),Lung-SCC(1),Lymph-BNHL(1),Ovary-AdenoCA(1),SoftTissue-Leiomyo(1),Stomach-AdenoCA(1)
DISRUPTION	'AP000304.12	15	Breast-AdenoCA(4),Prost-AdenoCA(2),SoftTissue-Liposarc(2),CNS-GBM(1),Eso-AdenoCA(1),Kidney-RCC(1),Liver-HCC(1),Lung-SCC(1),Ovary-AdenoCA(1),Stomach-AdenoCA(1)
DISRUPTION	'ARAP1	15	Breast-AdenoCA(4),Skin-Melanoma(4),Eso-AdenoCA(2),Stomach-AdenoCA(2),Head-SCC(1),Ovary-AdenoCA(1),Panc-Endocrine(1)
DISRUPTION	'ATF6	15	Breast-AdenoCA(4),Liver-HCC(4),SoftTissue-Liposarc(2),Kidney-RCC(1),Lymph-BNHL(1),Ovary-AdenoCA(1),Prost-AdenoCA(1),Uterus-AdenoCA(1)
DISRUPTION	'ATP2B1	15	SoftTissue-Liposarc(5),Panc-AdenoCA(3),Bone-Osteosarc(1),Eso-AdenoCA(1),Lung-AdenoCA(1),Ovary-AdenoCA(1),Prost-AdenoCA(1),Skin-Melanoma(1),Stomach-AdenoCA(1)
DISRUPTION	'BACH2	15	Prost-AdenoCA(4),Liver-HCC(3),Breast-AdenoCA(2),CNS-GBM(1),Eso-AdenoCA(1),Kidney-RCC(1),Lung-AdenoCA(1),Ovary-AdenoCA(1),SoftTissue-Liposarc(1)
DISRUPTION	'C2orf88	15	Breast-AdenoCA(4),Liver-HCC(3),Bone-Osteosarc(2),Prost-AdenoCA(2),Ovary-AdenoCA(1),Panc-Endocrine(1),Skin-Melanoma(1),SoftTissue-Liposarc(1)
DISRUPTION	'C5orf17	15	Bone-Osteosarc(2),Prost-AdenoCA(2),Skin-Melanoma(2),SoftTissue-Liposarc(2),Bladder-TCC(1),Eso-AdenoCA(1),Liver-HCC(1),Lung-AdenoCA(1),Lymph-BNHL(1),Ovary-AdenoCA(1),Panc-AdenoCA(1)
DISRUPTION	'C6	15	Head-SCC(2),Liver-HCC(2),Ovary-AdenoCA(2),Prost-AdenoCA(2),SoftTissue-Liposarc(2),Breast-AdenoCA(1),Eso-AdenoCA(1),Skin-Melanoma(1),SoftTissue-Leiomyo(1),Stomach-AdenoCA(1)
DISRUPTION	'CASZ1	15	Uterus-AdenoCA(4),Breast-AdenoCA(2),Eso-AdenoCA(2),Panc-AdenoCA(2),Stomach-AdenoCA(2),Lung-AdenoCA(1),Ovary-AdenoCA(1),Prost-AdenoCA(1)
DISRUPTION	'CDK14	15	ColoRect-AdenoCA(3),Breast-AdenoCA(2),Liver-HCC(2),Skin-Melanoma(2),Bone-Osteosarc(1),Eso-AdenoCA(1),Kidney-RCC(1),Panc-Endocrine(1),SoftTissue-Liposarc(1),Stomach-AdenoCA(1)
DISRUPTION	'CLNS1A	15	Breast-AdenoCA(5),Skin-Melanoma(5),Breast-LobularCA(2),Eso-AdenoCA(1),Lung-SCC(1),Stomach-AdenoCA(1)
DISRUPTION	'COL21A1	15	Breast-AdenoCA(4),Liver-HCC(3),Eso-AdenoCA(2),Skin-Melanoma(2),Biliary-AdenoCA(1),Bone-Osteosarc(1),Lung-SCC(1),Panc-AdenoCA(1)
DISRUPTION	'CTC-297N7.11	15	Breast-AdenoCA(3),Liver-HCC(3),Bone-Osteosarc(2),Eso-AdenoCA(2),Biliary-AdenoCA(1),Bladder-TCC(1),Prost-AdenoCA(1),Skin-Melanoma(1),SoftTissue-Liposarc(1)
DISRUPTION	'CTNNA1	15	Prost-AdenoCA(3),Liver-HCC(2),Lung-SCC(2),Stomach-AdenoCA(2),Breast-AdenoCA(1),ColoRect-AdenoCA(1),Eso-AdenoCA(1),Ovary-AdenoCA(1),Panc-AdenoCA(1),Skin-Melanoma(1)
DISRUPTION	'DDX10	15	Skin-Melanoma(3),Breast-AdenoCA(2),Ovary-AdenoCA(2),Prost-AdenoCA(2),Uterus-AdenoCA(2),Bone-Osteosarc(1),Lymph-BNHL(1),Panc-AdenoCA(1),SoftTissue-Liposarc(1)
DISRUPTION	'DLEU2	15	Breast-AdenoCA(4),Liver-HCC(2),Bone-Epith(1),CNS-GBM(1),Eso-AdenoCA(1),Kidney-ChRCC(1),Ovary-AdenoCA(1),Panc-AdenoCA(1),Prost-AdenoCA(1),Skin-Melanoma(1),Stomach-AdenoCA(1)
DISRUPTION	'DMXL1	15	Prost-AdenoCA(6),Liver-HCC(3),Skin-Melanoma(2),Bone-Osteosarc(1),Breast-AdenoCA(1),Breast-LobularCA(1),Eso-AdenoCA(1)
DISRUPTION	'DNAH8	15	Breast-AdenoCA(3),Eso-AdenoCA(2),Liver-HCC(2),Panc-AdenoCA(2),Bone-Osteosarc(1),Lung-AdenoCA(1),Ovary-AdenoCA(1),Prost-AdenoCA(1),Skin-Melanoma(1),Uterus-AdenoCA(1)
DISRUPTION	'EFCAB6	15	Prost-AdenoCA(5),Ovary-AdenoCA(2),Panc-AdenoCA(2),Breast-AdenoCA(1),Kidney-ChRCC(1),Lung-SCC(1),Panc-Endocrine(1),Skin-Melanoma(1),SoftTissue-Leiomyo(1)
DISRUPTION	'EPB41L1	15	Breast-AdenoCA(3),Prost-AdenoCA(3),Head-SCC(2),Bone-Osteosarc(1),CNS-GBM(1),Liver-HCC(1),Ovary-AdenoCA(1),SoftTissue-Liposarc(1),Stomach-AdenoCA(1),Uterus-AdenoCA(1)
DISRUPTION	'EYA2	15	Breast-AdenoCA(6),Ovary-AdenoCA(3),Eso-AdenoCA(2),Liver-HCC(1),Panc-AdenoCA(1),Prost-AdenoCA(1),Skin-Melanoma(1)
DISRUPTION	'FBXL17	15	Prost-AdenoCA(8),Panc-AdenoCA(2),Bone-Osteosarc(1),Eso-AdenoCA(1),Kidney-ChRCC(1),Kidney-RCC(1),Ovary-AdenoCA(1)
DISRUPTION	'FLJ27365	15	Prost-AdenoCA(3),Breast-AdenoCA(2),Ovary-AdenoCA(2),Panc-AdenoCA(2),Bone-Epith(1),ColoRect-AdenoCA(1),Eso-AdenoCA(1),Head-SCC(1),Lung-SCC(1),Uterus-AdenoCA(1)
DISRUPTION	'FLT1	15	Breast-AdenoCA(3),Panc-AdenoCA(2),Biliary-AdenoCA(1),Breast-LobularCA(1),ColoRect-AdenoCA(1),Eso-AdenoCA(1),Liver-HCC(1),Lung-AdenoCA(1),Lymph-BNHL(1),Lymph-CLL(1),Ovary-AdenoCA(1),Prost-AdenoCA(1)
DISRUPTION	'FMN2	15	Biliary-AdenoCA(2),Bone-Osteosarc(2),Panc-AdenoCA(2),Prost-AdenoCA(2),Skin-Melanoma(2),Breast-AdenoCA(1),CNS-GBM(1),Lung-AdenoCA(1),Ovary-AdenoCA(1),Stomach-AdenoCA(1)
DISRUPTION	'FYN	15	Prost-AdenoCA(9),Bone-Osteosarc(1),Breast-AdenoCA(1),Eso-AdenoCA(1),Panc-AdenoCA(1),Skin-Melanoma(1),Uterus-AdenoCA(1)
DISRUPTION	'GRIA4	15	Liver-HCC(3),Breast-AdenoCA(2),Lymph-BNHL(2),Bone-Osteosarc(1),ColoRect-AdenoCA(1),Eso-AdenoCA(1),Lung-SCC(1),Ovary-AdenoCA(1),Prost-AdenoCA(1),Skin-Melanoma(1),Stomach-AdenoCA(1)
DISRUPTION	'GSK3B	15	Breast-AdenoCA(5),Panc-AdenoCA(2),Prost-AdenoCA(2),Skin-Melanoma(2),Stomach-AdenoCA(2),CNS-GBM(1),Lymph-BNHL(1)
DISRUPTION	'GUSBP1	15	SoftTissue-Liposarc(6),Skin-Melanoma(3),Breast-AdenoCA(2),Bone-Osteosarc(1),ColoRect-AdenoCA(1),Kidney-ChRCC(1),Ovary-AdenoCA(1)
DISRUPTION	'HPSE2	15	Prost-AdenoCA(4),Breast-AdenoCA(2),Panc-AdenoCA(2),Stomach-AdenoCA(2),Bladder-TCC(1),Cervix-SCC(1),Kidney-RCC(1),Liver-HCC(1),Lung-SCC(1)
DISRUPTION	'ITPR1	15	Breast-AdenoCA(4),Panc-AdenoCA(3),Prost-AdenoCA(2),Eso-AdenoCA(1),Liver-HCC(1),Lung-SCC(1),Ovary-AdenoCA(1),Stomach-AdenoCA(1),Uterus-AdenoCA(1)
DISRUPTION	'KCNMB4	15	SoftTissue-Liposarc(6),Bone-Osteosarc(3),Lung-AdenoCA(2),Liver-HCC(1),Panc-AdenoCA(1),Skin-Melanoma(1),Stomach-AdenoCA(1)
DISRUPTION	'KCNT2	15	Breast-AdenoCA(4),Panc-AdenoCA(3),Stomach-AdenoCA(2),Bladder-TCC(1),Liver-HCC(1),Lung-AdenoCA(1),Prost-AdenoCA(1),Skin-Melanoma(1),SoftTissue-Liposarc(1)
DISRUPTION	'KCNU1	15	Breast-AdenoCA(4),Prost-AdenoCA(3),Liver-HCC(2),Panc-AdenoCA(2),Kidney-RCC(1),Lung-AdenoCA(1),Lymph-CLL(1),Ovary-AdenoCA(1)
DISRUPTION	'KCTD8	15	Prost-AdenoCA(5),Eso-AdenoCA(2),Lymph-BNHL(2),Skin-Melanoma(2),Bone-Osteosarc(1),Liver-HCC(1),Ovary-AdenoCA(1),Stomach-AdenoCA(1)
DISRUPTION	'KIAA0922	15	Prost-AdenoCA(9),Bladder-TCC(1),Breast-AdenoCA(1),Cervix-AdenoCA(1),Liver-HCC(1),Lymph-BNHL(1),Skin-Melanoma(1)
DISRUPTION	'KIAA1109	15	Prost-AdenoCA(9),ColoRect-AdenoCA(2),Bone-Benign(1),Panc-AdenoCA(1),Skin-Melanoma(1),SoftTissue-Liposarc(1)
DISRUPTION	'KIF13A	15	Prost-AdenoCA(6),Breast-AdenoCA(2),Ovary-AdenoCA(2),CNS-GBM(1),Skin-Melanoma(1),SoftTissue-Leiomyo(1),Stomach-AdenoCA(1),Uterus-AdenoCA(1)
DISRUPTION	'LINC00971	15	Breast-AdenoCA(3),Bone-Osteosarc(2),Ovary-AdenoCA(2),Prost-AdenoCA(2),Stomach-AdenoCA(2),Head-SCC(1),Lung-SCC(1),Panc-AdenoCA(1),Skin-Melanoma(1)
DISRUPTION	'LINC01035	15	Breast-AdenoCA(5),Prost-AdenoCA(4),Panc-AdenoCA(2),Biliary-AdenoCA(1),Eso-AdenoCA(1),Liver-HCC(1),Lung-SCC(1)
DISRUPTION	'LINC01091	15	Prost-AdenoCA(9),Panc-AdenoCA(2),Breast-AdenoCA(1),Ovary-AdenoCA(1),Skin-Melanoma(1),Uterus-AdenoCA(1)
DISRUPTION	'LIPA	15	Prost-AdenoCA(8),Stomach-AdenoCA(2),Breast-AdenoCA(1),CNS-GBM(1),Liver-HCC(1),Ovary-AdenoCA(1),Uterus-AdenoCA(1)
DISRUPTION	'LPIN1	15	Prost-AdenoCA(7),Breast-AdenoCA(2),Liver-HCC(2),Uterus-AdenoCA(2),Kidney-RCC(1),Ovary-AdenoCA(1)
DISRUPTION	'LRCH1	15	Liver-HCC(4),Bone-Osteosarc(2),Panc-AdenoCA(2),Biliary-AdenoCA(1),Breast-AdenoCA(1),Lymph-CLL(1),Ovary-AdenoCA(1),Prost-AdenoCA(1),Skin-Melanoma(1),Uterus-AdenoCA(1)
DISRUPTION	'MCTP1	15	Liver-HCC(3),Skin-Melanoma(2),Breast-AdenoCA(1),CNS-Medullo(1),ColoRect-AdenoCA(1),Eso-AdenoCA(1),Head-SCC(1),Kidney-ChRCC(1),Kidney-RCC(1),Ovary-AdenoCA(1),Panc-AdenoCA(1),SoftTissue-Liposarc(1)
DISRUPTION	'MLIP	15	Panc-AdenoCA(3),Biliary-AdenoCA(2),Lung-SCC(2),Skin-Melanoma(2),Bone-Benign(1),Bone-Osteosarc(1),Breast-AdenoCA(1),Cervix-SCC(1),Prost-AdenoCA(1),Stomach-AdenoCA(1)
DISRUPTION	'NCOR2	15	Ovary-AdenoCA(3),Eso-AdenoCA(2),Panc-AdenoCA(2),Prost-AdenoCA(2),Biliary-AdenoCA(1),Bone-Osteosarc(1),Breast-AdenoCA(1),Liver-HCC(1),Skin-Melanoma(1),SoftTissue-Liposarc(1)
DISRUPTION	'NEDD9	15	Prost-AdenoCA(10),Skin-Melanoma(2),Bone-Osteosarc(1),Breast-AdenoCA(1),Liver-HCC(1)
DISRUPTION	'NLK	15	Breast-AdenoCA(3),Skin-Melanoma(3),Bladder-TCC(1),Bone-Osteosarc(1),Eso-AdenoCA(1),Liver-HCC(1),Lung-SCC(1),Lymph-BNHL(1),Ovary-AdenoCA(1),Prost-AdenoCA(1),Uterus-AdenoCA(1)
DISRUPTION	'PAPPA2	15	Liver-HCC(4),SoftTissue-Liposarc(4),Breast-AdenoCA(2),Panc-AdenoCA(2),Ovary-AdenoCA(1),Skin-Melanoma(1),SoftTissue-Leiomyo(1)
DISRUPTION	'PCSK5	15	Breast-AdenoCA(4),Eso-AdenoCA(2),Biliary-AdenoCA(1),Bladder-TCC(1),Head-SCC(1),Kidney-RCC(1),Liver-HCC(1),Ovary-AdenoCA(1),Prost-AdenoCA(1),Skin-Melanoma(1),Stomach-AdenoCA(1)
DISRUPTION	'PDGFD	15	Bone-Osteosarc(2),Breast-AdenoCA(2),Lymph-BNHL(2),Cervix-SCC(1),ColoRect-AdenoCA(1),Eso-AdenoCA(1),Liver-HCC(1),Panc-AdenoCA(1),Prost-AdenoCA(1),Skin-Melanoma(1),Stomach-AdenoCA(1),Uterus-AdenoCA(1)
DISRUPTION	'PIBF1	15	Stomach-AdenoCA(4),Prost-AdenoCA(3),Biliary-AdenoCA(1),Breast-AdenoCA(1),ColoRect-AdenoCA(1),Eso-AdenoCA(1),Lymph-CLL(1),Ovary-AdenoCA(1),Panc-AdenoCA(1),Uterus-AdenoCA(1)
DISRUPTION	'PKD1L1	15	Prost-AdenoCA(9),Bone-Osteosarc(1),Eso-AdenoCA(1),Ovary-AdenoCA(1),Panc-AdenoCA(1),Skin-Melanoma(1),Uterus-AdenoCA(1)
DISRUPTION	'PLEKHM3	15	Liver-HCC(8),Panc-AdenoCA(2),Eso-AdenoCA(1),Ovary-AdenoCA(1),SoftTissue-Liposarc(1),Stomach-AdenoCA(1),Uterus-AdenoCA(1)
DISRUPTION	'PLXDC1	15	Breast-AdenoCA(6),Prost-AdenoCA(2),Breast-DCIS(1),Cervix-SCC(1),Eso-AdenoCA(1),Head-SCC(1),Lung-SCC(1),Lymph-BNHL(1),Skin-Melanoma(1)
DISRUPTION	'POLD3	15	Breast-AdenoCA(5),Skin-Melanoma(4),Eso-AdenoCA(1),Liver-HCC(1),Ovary-AdenoCA(1),Panc-AdenoCA(1),Stomach-AdenoCA(1),Uterus-AdenoCA(1)
DISRUPTION	'RELN	15	Bladder-TCC(2),Lung-SCC(2),Panc-AdenoCA(2),Stomach-AdenoCA(2),Breast-AdenoCA(1),ColoRect-AdenoCA(1),Eso-AdenoCA(1),Liver-HCC(1),Ovary-AdenoCA(1),Prost-AdenoCA(1),Skin-Melanoma(1)
DISRUPTION	'RP1-65P5.1	15	Prost-AdenoCA(5),Ovary-AdenoCA(3),Breast-AdenoCA(2),SoftTissue-Liposarc(2),Head-SCC(1),Lymph-BNHL(1),Uterus-AdenoCA(1)
DISRUPTION	'RP11-141M1.3	15	Breast-AdenoCA(2),Eso-AdenoCA(2),Prost-AdenoCA(2),Skin-Melanoma(2),Bone-Osteosarc(1),ColoRect-AdenoCA(1),Liver-HCC(1),Lung-AdenoCA(1),Lymph-CLL(1),Panc-AdenoCA(1),Stomach-AdenoCA(1)
DISRUPTION	'RP11-152P17.2	15	Breast-AdenoCA(4),Ovary-AdenoCA(2),Prost-AdenoCA(2),Eso-AdenoCA(1),Liver-HCC(1),Lung-AdenoCA(1),Panc-AdenoCA(1),Skin-Melanoma(1),SoftTissue-Liposarc(1),Stomach-AdenoCA(1)
DISRUPTION	'RP11-184E9.1	15	SoftTissue-Liposarc(4),Ovary-AdenoCA(2),Bone-Osteosarc(1),Breast-AdenoCA(1),Eso-AdenoCA(1),Liver-HCC(1),Lung-AdenoCA(1),Panc-AdenoCA(1),Prost-AdenoCA(1),Skin-Melanoma(1),Stomach-AdenoCA(1)
DISRUPTION	'RP11-567L7.6	15	Breast-AdenoCA(7),Liver-HCC(2),Prost-AdenoCA(2),CNS-Medullo(1),Ovary-AdenoCA(1),SoftTissue-Liposarc(1),Uterus-AdenoCA(1)
DISRUPTION	'RP11-653B10.1	15	Breast-AdenoCA(3),CNS-Medullo(2),Liver-HCC(2),Lung-AdenoCA(2),Prost-AdenoCA(2),Ovary-AdenoCA(1),Panc-AdenoCA(1),SoftTissue-Liposarc(1),Stomach-AdenoCA(1)
DISRUPTION	'SASH1	15	Eso-AdenoCA(5),SoftTissue-Liposarc(3),Ovary-AdenoCA(2),Panc-AdenoCA(2),Biliary-AdenoCA(1),Liver-HCC(1),Skin-Melanoma(1)
DISRUPTION	'SBF2	15	Panc-AdenoCA(4),Prost-AdenoCA(3),SoftTissue-Liposarc(2),Breast-AdenoCA(1),ColoRect-AdenoCA(1),Eso-AdenoCA(1),Liver-HCC(1),Lung-SCC(1),Stomach-AdenoCA(1)
DISRUPTION	'SEMA6D	15	Liver-HCC(3),Ovary-AdenoCA(2),Panc-AdenoCA(2),Prost-AdenoCA(2),Skin-Melanoma(2),Biliary-AdenoCA(1),Breast-AdenoCA(1),Kidney-ChRCC(1),Uterus-AdenoCA(1)
DISRUPTION	'SHROOM3	15	Breast-AdenoCA(5),Liver-HCC(2),Ovary-AdenoCA(2),Prost-AdenoCA(2),Eso-AdenoCA(1),Kidney-RCC(1),Panc-AdenoCA(1),Uterus-AdenoCA(1)
DISRUPTION	'SKAP2	15	Breast-AdenoCA(2),Panc-AdenoCA(2),Stomach-AdenoCA(2),Biliary-AdenoCA(1),ColoRect-AdenoCA(1),Eso-AdenoCA(1),Lung-SCC(1),Lymph-CLL(1),Prost-AdenoCA(1),Skin-Melanoma(1),SoftTissue-Leiomyo(1),SoftTissue-Liposarc(1)
DISRUPTION	'SLC24A3	15	Ovary-AdenoCA(4),Skin-Melanoma(3),Breast-AdenoCA(1),ColoRect-AdenoCA(1),Eso-AdenoCA(1),Liver-HCC(1),Lung-AdenoCA(1),Panc-AdenoCA(1),Stomach-AdenoCA(1),Uterus-AdenoCA(1)
DISRUPTION	'SLC25A26	15	Breast-AdenoCA(3),Liver-HCC(3),Uterus-AdenoCA(3),Panc-AdenoCA(2),Eso-AdenoCA(1),Lymph-CLL(1),Ovary-AdenoCA(1),Stomach-AdenoCA(1)
DISRUPTION	'ST8SIA1	15	Panc-AdenoCA(4),Bladder-TCC(2),SoftTissue-Liposarc(2),Stomach-AdenoCA(2),Breast-AdenoCA(1),CNS-Medullo(1),Lymph-BNHL(1),Ovary-AdenoCA(1),Prost-AdenoCA(1)
DISRUPTION	'STAG1	15	Ovary-AdenoCA(4),Breast-AdenoCA(3),Lung-SCC(2),Eso-AdenoCA(1),Head-SCC(1),Liver-HCC(1),Panc-AdenoCA(1),SoftTissue-Leiomyo(1),Uterus-AdenoCA(1)
DISRUPTION	'STK3	15	Panc-AdenoCA(3),Stomach-AdenoCA(3),Breast-AdenoCA(2),Liver-HCC(2),Biliary-AdenoCA(1),Head-SCC(1),Lung-AdenoCA(1),Prost-AdenoCA(1),SoftTissue-Liposarc(1)
DISRUPTION	'STK39	15	Prost-AdenoCA(5),Bone-Osteosarc(2),Liver-HCC(2),Lymph-BNHL(2),Breast-AdenoCA(1),Eso-AdenoCA(1),Skin-Melanoma(1),Stomach-AdenoCA(1)
DISRUPTION	'STXBP4	15	Breast-AdenoCA(7),Liver-HCC(2),Skin-Melanoma(2),Bone-Osteosarc(1),CNS-Medullo(1),Prost-AdenoCA(1),Uterus-AdenoCA(1)
DISRUPTION	'THSD7A	15	SoftTissue-Liposarc(3),Bone-Osteosarc(2),Lung-SCC(2),Panc-AdenoCA(2),Liver-HCC(1),Lung-AdenoCA(1),Lymph-BNHL(1),Prost-AdenoCA(1),Skin-Melanoma(1),Uterus-AdenoCA(1)
DISRUPTION	'TRDN	15	Prost-AdenoCA(5),Breast-AdenoCA(4),Skin-Melanoma(2),Bone-Benign(1),Liver-HCC(1),Panc-AdenoCA(1),SoftTissue-Liposarc(1)
DISRUPTION	'TUSC3	15	Breast-AdenoCA(4),Eso-AdenoCA(2),Prost-AdenoCA(2),Bladder-TCC(1),Bone-Osteosarc(1),Lung-AdenoCA(1),Lymph-BNHL(1),Panc-AdenoCA(1),SoftTissue-Liposarc(1),Stomach-AdenoCA(1)
DISRUPTION	'UNC13B	15	Liver-HCC(4),Panc-AdenoCA(3),Breast-AdenoCA(2),Skin-Melanoma(2),Bone-Osteosarc(1),Eso-AdenoCA(1),Lymph-BNHL(1),Stomach-AdenoCA(1)
DISRUPTION	'USP32	15	Breast-AdenoCA(6),Liver-HCC(2),Panc-AdenoCA(2),Bladder-TCC(1),Eso-AdenoCA(1),Head-SCC(1),Lymph-BNHL(1),Skin-Melanoma(1)
DISRUPTION	'ZFP64	15	Prost-AdenoCA(5),Liver-HCC(2),Skin-Melanoma(2),Stomach-AdenoCA(2),Breast-AdenoCA(1),Eso-AdenoCA(1),Ovary-AdenoCA(1),Uterus-AdenoCA(1)
DISRUPTION	'ZMYM2	15	Breast-AdenoCA(4),Lung-AdenoCA(3),Biliary-AdenoCA(1),Eso-AdenoCA(1),Kidney-ChRCC(1),Panc-AdenoCA(1),Prost-AdenoCA(1),Skin-Melanoma(1),SoftTissue-Leiomyo(1),Uterus-AdenoCA(1)
DISRUPTION	'ZNF385B	15	Prost-AdenoCA(9),Liver-HCC(2),Eso-AdenoCA(1),Lymph-BNHL(1),Skin-Melanoma(1),Stomach-AdenoCA(1)
EXON_SKIP	'C10orf11	15	Eso-AdenoCA(4),Liver-HCC(2),Ovary-AdenoCA(2),Stomach-AdenoCA(2),Uterus-AdenoCA(2),ColoRect-AdenoCA(1),Lung-AdenoCA(1),Prost-AdenoCA(1)
EXON_SKIP	'CDH13	15	Head-SCC(6),Breast-AdenoCA(3),Cervix-SCC(1),ColoRect-AdenoCA(1),Kidney-ChRCC(1),Liver-HCC(1),Lung-SCC(1),Panc-AdenoCA(1)
EXON_SKIP	'DPYD	15	Liver-HCC(3),Lung-SCC(3),Ovary-AdenoCA(2),Bladder-TCC(1),CNS-Medullo(1),Head-SCC(1),Kidney-RCC(1),Skin-Melanoma(1),Stomach-AdenoCA(1),Uterus-AdenoCA(1)
EXON_SKIP	'GRID2	15	Liver-HCC(3),Bone-Osteosarc(2),Skin-Melanoma(2),Bladder-TCC(1),Head-SCC(1),Lung-SCC(1),Lymph-BNHL(1),Myeloid-AML(1),Prost-AdenoCA(1),Stomach-AdenoCA(1),Uterus-AdenoCA(1)
EXON_SKIP	'LINGO2	15	Panc-AdenoCA(3),Lung-SCC(2),Ovary-AdenoCA(2),Bladder-TCC(1),Breast-AdenoCA(1),CNS-GBM(1),Eso-AdenoCA(1),Head-SCC(1),Lymph-BNHL(1),Prost-AdenoCA(1),SoftTissue-Liposarc(1)
EXON_SKIP	'LPHN3	15	Bone-Osteosarc(2),Head-SCC(2),Kidney-RCC(2),CNS-Medullo(1),Eso-AdenoCA(1),Kidney-ChRCC(1),Liver-HCC(1),Lung-SCC(1),Lymph-BNHL(1),Panc-AdenoCA(1),SoftTissue-Liposarc(1),Stomach-AdenoCA(1)
EXON_SKIP	'PLCB1	15	Breast-AdenoCA(2),Liver-HCC(2),Bladder-TCC(1),Bone-Osteosarc(1),ColoRect-AdenoCA(1),Eso-AdenoCA(1),Head-SCC(1),Lung-SCC(1),Ovary-AdenoCA(1),Panc-AdenoCA(1),SoftTissue-Leiomyo(1),Stomach-AdenoCA(1),Uterus-AdenoCA(1)
EXON_SKIP	'PTK2	15	Breast-AdenoCA(3),Eso-AdenoCA(3),Liver-HCC(3),Bladder-TCC(1),ColoRect-AdenoCA(1),Lung-SCC(1),Ovary-AdenoCA(1),Skin-Melanoma(1),Stomach-AdenoCA(1)
EXON_SKIP	'TBC1D5	15	Liver-HCC(5),Stomach-AdenoCA(3),Eso-AdenoCA(2),ColoRect-AdenoCA(1),Ovary-AdenoCA(1),Panc-AdenoCA(1),Skin-Melanoma(1),SoftTissue-Liposarc(1)
EXON_SKIP	'TMPRSS2	15	Prost-AdenoCA(15)
EXON_SKIP	'VMP1	15	Head-SCC(4),Kidney-RCC(2),Bladder-TCC(1),Bone-Osteosarc(1),Breast-AdenoCA(1),Cervix-SCC(1),ColoRect-AdenoCA(1),Eso-AdenoCA(1),Lung-SCC(1),Stomach-AdenoCA(1),Uterus-AdenoCA(1)
ITD	'CSMD3	15	Eso-AdenoCA(3),Prost-AdenoCA(3),Breast-AdenoCA(2),Liver-HCC(2),Ovary-AdenoCA(2),Lung-AdenoCA(1),Skin-Melanoma(1),Uterus-AdenoCA(1)
ITD	'VPS13B	15	Eso-AdenoCA(4),Stomach-AdenoCA(2),Bladder-TCC(1),Bone-Benign(1),Breast-AdenoCA(1),Liver-HCC(1),Lymph-BNHL(1),Ovary-AdenoCA(1),Prost-AdenoCA(1),Skin-Melanoma(1),SoftTissue-Liposarc(1)
DYSFUNCTIONAL_FUSION	'KIF26B:SMYD3	15	Eso-AdenoCA(5),Breast-AdenoCA(3),Lung-AdenoCA(2),Bone-Osteosarc(1),Liver-HCC(1),Lung-SCC(1),Ovary-AdenoCA(1),Uterus-AdenoCA(1)
FUSION_5	'AC003051.1	15	Breast-AdenoCA(6),Eso-AdenoCA(3),Skin-Melanoma(3),Liver-HCC(1),Ovary-AdenoCA(1),SoftTissue-Leiomyo(1)
FUSION_5	'AC007319.1	15	Prost-AdenoCA(4),Lung-AdenoCA(3),Skin-Melanoma(2),Bladder-TCC(1),Eso-AdenoCA(1),Lung-SCC(1),Ovary-AdenoCA(1),Panc-AdenoCA(1),SoftTissue-Leiomyo(1)
FUSION_5	'BACH1	15	Kidney-RCC(4),Breast-AdenoCA(2),Ovary-AdenoCA(2),Panc-AdenoCA(2),Breast-LobularCA(1),Eso-AdenoCA(1),Liver-HCC(1),Prost-AdenoCA(1),Stomach-AdenoCA(1)
FUSION_5	'C12orf75	15	SoftTissue-Liposarc(7),Prost-AdenoCA(3),Bone-Osteosarc(1),CNS-GBM(1),Eso-AdenoCA(1),Liver-HCC(1),Skin-Melanoma(1)
FUSION_5	'CAMK1D	15	Prost-AdenoCA(9),Breast-AdenoCA(2),Liver-HCC(1),Ovary-AdenoCA(1),Skin-Melanoma(1),Stomach-AdenoCA(1)
FUSION_5	'CAMTA1	15	CNS-GBM(4),Breast-AdenoCA(2),Ovary-AdenoCA(2),Eso-AdenoCA(1),Head-SCC(1),Lung-AdenoCA(1),Lymph-BNHL(1),Prost-AdenoCA(1),Skin-Melanoma(1),SoftTissue-Leiomyo(1)
FUSION_5	'CDH1	15	Prost-AdenoCA(5),Uterus-AdenoCA(3),Skin-Melanoma(2),Breast-AdenoCA(1),CNS-GBM(1),Liver-HCC(1),Panc-AdenoCA(1),Stomach-AdenoCA(1)
FUSION_5	'CDKAL1	15	Breast-AdenoCA(5),Biliary-AdenoCA(2),Ovary-AdenoCA(2),Bone-Benign(1),Bone-Osteosarc(1),Eso-AdenoCA(1),Head-SCC(1),Lung-AdenoCA(1),Skin-Melanoma(1)
FUSION_5	'CHST11	15	SoftTissue-Liposarc(10),Prost-AdenoCA(2),Bone-Osteosarc(1),Lung-AdenoCA(1),Ovary-AdenoCA(1)
FUSION_5	'CNTLN	15	Prost-AdenoCA(3),Breast-AdenoCA(2),Liver-HCC(2),Bladder-TCC(1),Bone-Osteosarc(1),Eso-AdenoCA(1),Panc-AdenoCA(1),Skin-Melanoma(1),SoftTissue-Liposarc(1),Stomach-AdenoCA(1),Uterus-AdenoCA(1)
FUSION_5	'COL21A1	15	Panc-AdenoCA(4),Breast-AdenoCA(3),Eso-AdenoCA(3),Liver-HCC(2),Bone-Benign(1),Bone-Osteosarc(1),Uterus-AdenoCA(1)
FUSION_5	'DGKD	15	Eso-AdenoCA(9),Stomach-AdenoCA(3),Head-SCC(1),Ovary-AdenoCA(1),SoftTissue-Leiomyo(1)
FUSION_5	'EEA1	15	SoftTissue-Liposarc(7),Liver-HCC(5),ColoRect-AdenoCA(2),Breast-AdenoCA(1)
FUSION_5	'ESRRG	15	Breast-AdenoCA(3),Liver-HCC(3),Biliary-AdenoCA(2),Bladder-TCC(1),Bone-Osteosarc(1),CNS-GBM(1),Lung-SCC(1),Panc-AdenoCA(1),Prost-AdenoCA(1),Skin-Melanoma(1)
FUSION_5	'FHIT	15	Stomach-AdenoCA(6),Breast-AdenoCA(2),Kidney-RCC(2),Eso-AdenoCA(1),Lymph-BNHL(1),Ovary-AdenoCA(1),Panc-AdenoCA(1),Prost-AdenoCA(1)
FUSION_5	'GALNTL6	15	Skin-Melanoma(4),Liver-HCC(3),Prost-AdenoCA(2),Bone-Osteosarc(1),Breast-AdenoCA(1),Head-SCC(1),Ovary-AdenoCA(1),SoftTissue-Liposarc(1),Stomach-AdenoCA(1)
FUSION_5	'GRM8	15	SoftTissue-Liposarc(6),Skin-Melanoma(4),CNS-GBM(1),Liver-HCC(1),Lung-SCC(1),Ovary-AdenoCA(1),Prost-AdenoCA(1)
FUSION_5	'HIVEP3	15	Panc-AdenoCA(5),Ovary-AdenoCA(4),Bladder-TCC(1),Breast-AdenoCA(1),CNS-Medullo(1),Kidney-RCC(1),Liver-HCC(1),SoftTissue-Liposarc(1)
FUSION_5	'HOOK2	15	Breast-AdenoCA(5),Skin-Melanoma(4),Lung-SCC(2),Lymph-BNHL(2),Cervix-SCC(1),Ovary-AdenoCA(1)
FUSION_5	'LRBA	15	Ovary-AdenoCA(3),Bladder-TCC(2),Breast-AdenoCA(2),Prost-AdenoCA(2),Lung-AdenoCA(1),Lung-SCC(1),Lymph-BNHL(1),Skin-Melanoma(1),SoftTissue-Liposarc(1),Stomach-AdenoCA(1)
FUSION_5	'MAML2	15	Breast-AdenoCA(4),Skin-Melanoma(3),Panc-AdenoCA(2),Biliary-AdenoCA(1),CNS-Medullo(1),Head-SCC(1),Liver-HCC(1),Lung-SCC(1),Prost-AdenoCA(1)
FUSION_5	'MAST4	15	Prost-AdenoCA(7),Breast-AdenoCA(2),Liver-HCC(2),Breast-LobularCA(1),Eso-AdenoCA(1),Lung-SCC(1),Panc-AdenoCA(1)
FUSION_5	'MYO1D	15	Breast-AdenoCA(3),Eso-AdenoCA(3),Stomach-AdenoCA(3),Liver-HCC(2),Bladder-TCC(1),Bone-Osteosarc(1),Skin-Melanoma(1),SoftTissue-Liposarc(1)
FUSION_5	'NFIX	15	Breast-AdenoCA(4),Skin-Melanoma(4),Ovary-AdenoCA(3),Bone-Osteosarc(1),Panc-AdenoCA(1),Prost-AdenoCA(1),Thy-AdenoCA(1)
FUSION_5	'NOS1AP	15	Prost-AdenoCA(9),SoftTissue-Liposarc(4),Breast-AdenoCA(1),Lymph-CLL(1)
FUSION_5	'RP11-110A12.2	15	SoftTissue-Liposarc(8),Panc-AdenoCA(4),Biliary-AdenoCA(1),Eso-AdenoCA(1),Liver-HCC(1)
FUSION_5	'RP11-32K4.1	15	Prost-AdenoCA(5),Lung-AdenoCA(4),Liver-HCC(3),Breast-AdenoCA(1),Panc-AdenoCA(1),Skin-Melanoma(1)
FUSION_5	'RP11-444A22.1	15	Eso-AdenoCA(3),Prost-AdenoCA(3),Breast-AdenoCA(2),Lymph-BNHL(2),Ovary-AdenoCA(2),Biliary-AdenoCA(1),Panc-AdenoCA(1),Skin-Melanoma(1)
FUSION_5	'RP11-81H3.2	15	SoftTissue-Liposarc(10),Breast-AdenoCA(2),Ovary-AdenoCA(2),Lung-AdenoCA(1)
FUSION_5	'SCYL2	15	Prost-AdenoCA(8),Lymph-BNHL(2),SoftTissue-Liposarc(2),Bone-Osteosarc(1),Liver-HCC(1),SoftTissue-Leiomyo(1)
FUSION_5	'SDK2	15	Breast-AdenoCA(9),Liver-HCC(2),Lung-SCC(1),Ovary-AdenoCA(1),Panc-AdenoCA(1),SoftTissue-Liposarc(1)
FUSION_5	'SND1	15	Prost-AdenoCA(4),Skin-Melanoma(4),SoftTissue-Liposarc(4),Panc-AdenoCA(2),SoftTissue-Leiomyo(1)
FUSION_5	'SORBS1	15	Prost-AdenoCA(5),Breast-AdenoCA(2),Eso-AdenoCA(2),Ovary-AdenoCA(2),Stomach-AdenoCA(2),Liver-HCC(1),Uterus-AdenoCA(1)
FUSION_5	'STAG1	15	Ovary-AdenoCA(7),Breast-AdenoCA(5),Lung-SCC(1),Prost-AdenoCA(1),SoftTissue-Leiomyo(1)
FUSION_5	'TENM2	15	Ovary-AdenoCA(2),Panc-AdenoCA(2),Skin-Melanoma(2),Bladder-TCC(1),Breast-AdenoCA(1),CNS-Medullo(1),Eso-AdenoCA(1),Kidney-RCC(1),Liver-HCC(1),Panc-Endocrine(1),Prost-AdenoCA(1),SoftTissue-Liposarc(1)
FUSION_5	'TEX14	15	Breast-AdenoCA(8),Panc-AdenoCA(3),Lung-SCC(1),Ovary-AdenoCA(1),Prost-AdenoCA(1),Stomach-AdenoCA(1)
FUSION_5	'TMEM132D	15	SoftTissue-Leiomyo(3),SoftTissue-Liposarc(3),Ovary-AdenoCA(2),Prost-AdenoCA(2),Biliary-AdenoCA(1),Bone-Osteosarc(1),Breast-AdenoCA(1),Head-SCC(1),Liver-HCC(1)
FUSION_5	'TNRC18	15	Prost-AdenoCA(5),Skin-Melanoma(5),Uterus-AdenoCA(3),CNS-GBM(1),Eso-AdenoCA(1)
FUSION_5	'TRPM3	15	Breast-AdenoCA(6),SoftTissue-Liposarc(5),Bone-Osteosarc(1),Eso-AdenoCA(1),Ovary-AdenoCA(1),Panc-AdenoCA(1)
FUSION_5	'URI1	15	Ovary-AdenoCA(3),Biliary-AdenoCA(2),Eso-AdenoCA(2),Liver-HCC(2),Panc-AdenoCA(2),Uterus-AdenoCA(2),Bone-Osteosarc(1),Breast-AdenoCA(1)
FUSION_5	'USH2A	15	Breast-AdenoCA(7),CNS-GBM(3),Biliary-AdenoCA(1),Liver-HCC(1),Lung-AdenoCA(1),Ovary-AdenoCA(1),Skin-Melanoma(1)
FUSION_5	'UTRN	15	Eso-AdenoCA(3),Biliary-AdenoCA(2),Breast-AdenoCA(2),Prost-AdenoCA(2),Liver-HCC(1),Lung-AdenoCA(1),Ovary-AdenoCA(1),Panc-Endocrine(1),Skin-Melanoma(1),Uterus-AdenoCA(1)
FUSION_5	'WDPCP	15	Liver-HCC(4),ColoRect-AdenoCA(2),Eso-AdenoCA(2),Lung-SCC(2),Ovary-AdenoCA(1),Panc-AdenoCA(1),Prost-AdenoCA(1),Skin-Melanoma(1),Uterus-AdenoCA(1)
FUSION_5	'ZNF385B	15	Prost-AdenoCA(11),Breast-AdenoCA(2),Eso-AdenoCA(1),Liver-HCC(1)
FUSION_3	'AC004041.2	15	SoftTissue-Liposarc(15)
FUSION_3	'ALK	15	Panc-AdenoCA(3),SoftTissue-Leiomyo(3),Eso-AdenoCA(2),Prost-AdenoCA(2),Thy-AdenoCA(2),Breast-AdenoCA(1),Lung-AdenoCA(1),Lung-SCC(1)
FUSION_3	'ATAD1	15	Prost-AdenoCA(13),Panc-AdenoCA(1),Skin-Melanoma(1)
FUSION_3	'ATXN7L1	15	Breast-AdenoCA(4),SoftTissue-Liposarc(3),Stomach-AdenoCA(3),Lung-AdenoCA(2),Liver-HCC(1),Lung-SCC(1),Ovary-AdenoCA(1)
FUSION_3	'CADM2	15	Breast-AdenoCA(6),Panc-AdenoCA(2),Bone-Osteosarc(1),CNS-Medullo(1),Kidney-RCC(1),Liver-HCC(1),Ovary-AdenoCA(1),Skin-Melanoma(1),Stomach-AdenoCA(1)
FUSION_3	'CCDC91	15	Bone-Osteosarc(4),Bladder-TCC(3),Ovary-AdenoCA(2),Biliary-AdenoCA(1),Breast-AdenoCA(1),Eso-AdenoCA(1),Kidney-ChRCC(1),Lung-AdenoCA(1),Skin-Melanoma(1)
FUSION_3	'DCDC1	15	Panc-AdenoCA(5),Eso-AdenoCA(3),Breast-AdenoCA(2),Ovary-AdenoCA(1),Prost-AdenoCA(1),Skin-Melanoma(1),SoftTissue-Liposarc(1),Stomach-AdenoCA(1)
FUSION_3	'DST	15	Breast-AdenoCA(3),Liver-HCC(3),Panc-AdenoCA(3),ColoRect-AdenoCA(2),Uterus-AdenoCA(2),Bone-Osteosarc(1),Head-SCC(1)
FUSION_3	'FAM222B	15	Breast-AdenoCA(4),Uterus-AdenoCA(4),Skin-Melanoma(2),Breast-LobularCA(1),CNS-Medullo(1),Eso-AdenoCA(1),Panc-AdenoCA(1),SoftTissue-Liposarc(1)
FUSION_3	'FCHSD2	15	Breast-AdenoCA(4),Skin-Melanoma(4),Breast-LobularCA(1),Eso-AdenoCA(1),Liver-HCC(1),Lung-SCC(1),Prost-AdenoCA(1),SoftTissue-Liposarc(1),Stomach-AdenoCA(1)
FUSION_3	'GNG7	15	Skin-Melanoma(11),SoftTissue-Liposarc(2),Breast-AdenoCA(1),Ovary-AdenoCA(1)
FUSION_3	'GRIA4	15	Bone-Osteosarc(5),Lung-SCC(5),Skin-Melanoma(2),Breast-AdenoCA(1),CNS-Oligo(1),Liver-HCC(1)
FUSION_3	'HMGA2	15	SoftTissue-Liposarc(7),Panc-AdenoCA(3),Skin-Melanoma(2),Lung-SCC(1),Stomach-AdenoCA(1),Uterus-AdenoCA(1)
FUSION_3	'KCNH7	15	Prost-AdenoCA(11),Bone-Osteosarc(1),Liver-HCC(1),Ovary-AdenoCA(1),Panc-Endocrine(1)
FUSION_3	'KIF5A	15	CNS-GBM(5),SoftTissue-Liposarc(4),Bone-Osteosarc(2),Skin-Melanoma(2),Stomach-AdenoCA(2)
FUSION_3	'KMT2C	15	Breast-AdenoCA(4),Prost-AdenoCA(3),Ovary-AdenoCA(2),Panc-AdenoCA(2),Stomach-AdenoCA(2),Liver-HCC(1),Lung-SCC(1)
FUSION_3	'LAMA3	15	Panc-AdenoCA(4),Breast-AdenoCA(2),Eso-AdenoCA(2),Skin-Melanoma(2),Stomach-AdenoCA(2),Liver-HCC(1),Lung-AdenoCA(1),Uterus-AdenoCA(1)
FUSION_3	'LGR5	15	SoftTissue-Liposarc(5),Bone-Osteosarc(4),Breast-AdenoCA(2),Stomach-AdenoCA(2),ColoRect-AdenoCA(1),Eso-AdenoCA(1)
FUSION_3	'LINGO2	15	Skin-Melanoma(4),Lymph-BNHL(3),Breast-AdenoCA(2),CNS-GBM(2),Eso-AdenoCA(2),Liver-HCC(1),Uterus-AdenoCA(1)
FUSION_3	'NFIC	15	Skin-Melanoma(10),Panc-AdenoCA(2),Eso-AdenoCA(1),Liver-HCC(1),Ovary-AdenoCA(1)
FUSION_3	'PCLO	15	Prost-AdenoCA(8),Ovary-AdenoCA(2),Skin-Melanoma(2),Bone-Osteosarc(1),ColoRect-AdenoCA(1),Kidney-RCC(1)
FUSION_3	'PITPNC1	15	Breast-AdenoCA(4),Eso-AdenoCA(3),SoftTissue-Liposarc(3),Bone-Osteosarc(1),Liver-HCC(1),Lung-SCC(1),Prost-AdenoCA(1),Uterus-AdenoCA(1)
FUSION_3	'POLD3	15	Skin-Melanoma(5),Breast-AdenoCA(4),Eso-AdenoCA(2),Panc-AdenoCA(2),Breast-LobularCA(1),Ovary-AdenoCA(1)
FUSION_3	'PPFIA1	15	Skin-Melanoma(4),Bladder-TCC(3),Breast-AdenoCA(2),Head-SCC(2),Liver-HCC(2),Breast-LobularCA(1),Eso-AdenoCA(1)
FUSION_3	'PRKCH	15	Ovary-AdenoCA(3),Stomach-AdenoCA(3),Breast-AdenoCA(2),Cervix-SCC(2),Kidney-RCC(2),Eso-AdenoCA(1),Prost-AdenoCA(1),Uterus-AdenoCA(1)
FUSION_3	'PRKDC	15	Prost-AdenoCA(11),Liver-HCC(2),Bladder-TCC(1),Breast-AdenoCA(1)
FUSION_3	'PTPRN2	15	Breast-AdenoCA(3),Ovary-AdenoCA(3),Skin-Melanoma(2),Stomach-AdenoCA(2),Eso-AdenoCA(1),Liver-HCC(1),Panc-Endocrine(1),Prost-AdenoCA(1),SoftTissue-Leiomyo(1)
FUSION_3	'PTPRT	15	Breast-AdenoCA(6),Bone-Osteosarc(4),Panc-AdenoCA(2),Ovary-AdenoCA(1),Skin-Melanoma(1),SoftTissue-Liposarc(1)
FUSION_3	'RABGAP1L	15	Bone-Osteosarc(3),Liver-HCC(2),Skin-Melanoma(2),SoftTissue-Liposarc(2),Bone-Benign(1),Breast-AdenoCA(1),Panc-AdenoCA(1),Panc-Endocrine(1),Prost-AdenoCA(1),Stomach-AdenoCA(1)
FUSION_3	'RGS6	15	Prost-AdenoCA(4),Ovary-AdenoCA(3),Panc-AdenoCA(2),Uterus-AdenoCA(2),Breast-AdenoCA(1),Liver-HCC(1),Lymph-BNHL(1),SoftTissue-Liposarc(1)
FUSION_3	'RP11-556I14.1	15	Prost-AdenoCA(13),Bone-Benign(1),Panc-AdenoCA(1)
FUSION_3	'RP11-770E5.1	15	Prost-AdenoCA(11),Liver-HCC(2),Breast-AdenoCA(1),Eso-AdenoCA(1)
FUSION_3	'SCAPER	15	Liver-HCC(4),Panc-AdenoCA(4),Eso-AdenoCA(3),Ovary-AdenoCA(2),Skin-Melanoma(2)
FUSION_3	'SLC35F1	15	SoftTissue-Liposarc(6),Prost-AdenoCA(4),Breast-AdenoCA(2),Bone-Osteosarc(1),Liver-HCC(1),Skin-Melanoma(1)
FUSION_3	'SOX5	15	Breast-AdenoCA(3),Liver-HCC(3),Prost-AdenoCA(3),Bone-Osteosarc(2),Uterus-AdenoCA(2),ColoRect-AdenoCA(1),Lymph-BNHL(1)
FUSION_3	'SYN3	15	Breast-AdenoCA(3),Bladder-TCC(2),Prost-AdenoCA(2),Bone-Osteosarc(1),Eso-AdenoCA(1),Head-SCC(1),Liver-HCC(1),Lung-AdenoCA(1),Skin-Melanoma(1),SoftTissue-Leiomyo(1),SoftTissue-Liposarc(1)
FUSION_3	'TBC1D22A	15	Breast-AdenoCA(3),Skin-Melanoma(3),Eso-AdenoCA(2),Liver-HCC(2),Bone-Osteosarc(1),Lymph-BNHL(1),Ovary-AdenoCA(1),Panc-AdenoCA(1),SoftTissue-Liposarc(1)
FUSION_3	'TRAPPC9	15	Prost-AdenoCA(6),Breast-AdenoCA(3),Skin-Melanoma(2),Stomach-AdenoCA(2),Ovary-AdenoCA(1),Panc-AdenoCA(1)
DISRUPTION	'AC003051.1	14	Breast-AdenoCA(4),Skin-Melanoma(3),Eso-AdenoCA(1),Head-SCC(1),Liver-HCC(1),Lung-SCC(1),Panc-AdenoCA(1),SoftTissue-Leiomyo(1),SoftTissue-Liposarc(1)
DISRUPTION	'AC009499.1	14	Breast-AdenoCA(2),Lymph-BNHL(2),Ovary-AdenoCA(2),Skin-Melanoma(2),Eso-AdenoCA(1),Liver-HCC(1),Panc-AdenoCA(1),Prost-AdenoCA(1),SoftTissue-Leiomyo(1),SoftTissue-Liposarc(1)
DISRUPTION	'AC025263.3	14	SoftTissue-Liposarc(6),Bone-Osteosarc(2),Lung-AdenoCA(2),CNS-GBM(1),Liver-HCC(1),Skin-Melanoma(1),Stomach-AdenoCA(1)
DISRUPTION	'AC068490.2	14	Panc-AdenoCA(3),Prost-AdenoCA(3),Eso-AdenoCA(2),Liver-HCC(2),Lung-SCC(1),Lymph-CLL(1),Ovary-AdenoCA(1),SoftTissue-Liposarc(1)
DISRUPTION	'AC091969.1	14	Prost-AdenoCA(4),Ovary-AdenoCA(3),Skin-Melanoma(2),Stomach-AdenoCA(2),Breast-AdenoCA(1),CNS-Medullo(1),Cervix-SCC(1)
DISRUPTION	'ADAM5	14	Breast-AdenoCA(5),Panc-AdenoCA(3),Liver-HCC(2),Ovary-AdenoCA(2),Prost-AdenoCA(1),Stomach-AdenoCA(1)
DISRUPTION	'AFF4	14	Prost-AdenoCA(10),Liver-HCC(2),Panc-AdenoCA(1),Stomach-AdenoCA(1)
DISRUPTION	'AKAP13	14	Panc-AdenoCA(6),Ovary-AdenoCA(3),Breast-AdenoCA(2),Eso-AdenoCA(1),Lymph-BNHL(1),Skin-Melanoma(1)
DISRUPTION	'AKT3	14	Bone-Osteosarc(2),Breast-AdenoCA(2),Ovary-AdenoCA(2),Biliary-AdenoCA(1),Eso-AdenoCA(1),Lung-AdenoCA(1),Panc-AdenoCA(1),Prost-AdenoCA(1),Skin-Melanoma(1),SoftTissue-Liposarc(1),Uterus-AdenoCA(1)
DISRUPTION	'ANKRD30B	14	Panc-AdenoCA(4),Breast-AdenoCA(2),Skin-Melanoma(2),Bone-Osteosarc(1),Eso-AdenoCA(1),Head-SCC(1),Prost-AdenoCA(1),SoftTissue-Liposarc(1),Uterus-AdenoCA(1)
DISRUPTION	'ARHGAP24	14	Liver-HCC(3),Ovary-AdenoCA(3),Breast-AdenoCA(2),Eso-AdenoCA(2),Biliary-AdenoCA(1),Kidney-RCC(1),Prost-AdenoCA(1),Skin-Melanoma(1)
DISRUPTION	'ARHGEF28	14	Uterus-AdenoCA(3),Eso-AdenoCA(2),Liver-HCC(2),Ovary-AdenoCA(2),Bone-Osteosarc(1),ColoRect-AdenoCA(1),Panc-AdenoCA(1),Prost-AdenoCA(1),SoftTissue-Liposarc(1)
DISRUPTION	'ARHGEF38	14	Prost-AdenoCA(9),CNS-Medullo(1),Eso-AdenoCA(1),Lung-AdenoCA(1),Panc-AdenoCA(1),Uterus-AdenoCA(1)
DISRUPTION	'ARL15	14	Breast-AdenoCA(3),SoftTissue-Liposarc(3),Bone-Epith(1),Bone-Osteosarc(1),Head-SCC(1),Lung-AdenoCA(1),Lung-SCC(1),Ovary-AdenoCA(1),Prost-AdenoCA(1),Stomach-AdenoCA(1)
DISRUPTION	'ASXL3	14	Prost-AdenoCA(4),Panc-AdenoCA(3),Eso-AdenoCA(2),Bone-Osteosarc(1),Breast-AdenoCA(1),Ovary-AdenoCA(1),SoftTissue-Leiomyo(1),Uterus-AdenoCA(1)
DISRUPTION	'ATP2C1	14	Prost-AdenoCA(8),Ovary-AdenoCA(2),Breast-AdenoCA(1),Eso-AdenoCA(1),Lymph-BNHL(1),Uterus-AdenoCA(1)
DISRUPTION	'BRIP1	14	Breast-AdenoCA(9),Panc-AdenoCA(2),Eso-AdenoCA(1),Liver-HCC(1),Skin-Melanoma(1)
DISRUPTION	'C10orf76	14	Prost-AdenoCA(5),Ovary-AdenoCA(2),Uterus-AdenoCA(2),Breast-AdenoCA(1),Lymph-BNHL(1),Panc-AdenoCA(1),Skin-Melanoma(1),Stomach-AdenoCA(1)
DISRUPTION	'C12orf42	14	SoftTissue-Liposarc(5),Breast-AdenoCA(2),Bone-Osteosarc(1),CNS-GBM(1),Head-SCC(1),Liver-HCC(1),Lymph-BNHL(1),Panc-AdenoCA(1),Prost-AdenoCA(1)
DISRUPTION	'C9orf3	14	Breast-AdenoCA(3),Prost-AdenoCA(2),Bone-Osteosarc(1),Eso-AdenoCA(1),Head-SCC(1),Liver-HCC(1),Lung-SCC(1),Ovary-AdenoCA(1),Panc-AdenoCA(1),Skin-Melanoma(1),Uterus-AdenoCA(1)
DISRUPTION	'CAND1	14	Bone-Osteosarc(3),SoftTissue-Liposarc(3),Breast-AdenoCA(2),Eso-AdenoCA(2),Biliary-AdenoCA(1),CNS-GBM(1),Skin-Melanoma(1),Stomach-AdenoCA(1)
DISRUPTION	'CNIH3	14	Breast-AdenoCA(4),Liver-HCC(3),Prost-AdenoCA(2),Eso-AdenoCA(1),Panc-AdenoCA(1),Skin-Melanoma(1),SoftTissue-Liposarc(1),Uterus-AdenoCA(1)
DISRUPTION	'COG6	14	Prost-AdenoCA(5),Eso-AdenoCA(2),Bone-Osteosarc(1),Breast-AdenoCA(1),Kidney-RCC(1),Liver-HCC(1),Lung-AdenoCA(1),Panc-AdenoCA(1),Uterus-AdenoCA(1)
DISRUPTION	'CPA6	14	Liver-HCC(2),Ovary-AdenoCA(2),Prost-AdenoCA(2),Bladder-TCC(1),CNS-GBM(1),Eso-AdenoCA(1),Kidney-RCC(1),Panc-AdenoCA(1),Skin-Melanoma(1),SoftTissue-Liposarc(1),Uterus-AdenoCA(1)
DISRUPTION	'CPXM2	14	Prost-AdenoCA(9),Liver-HCC(2),Eso-AdenoCA(1),Lung-AdenoCA(1),Panc-AdenoCA(1)
DISRUPTION	'CTB-111H14.1	14	Breast-AdenoCA(4),Lung-SCC(3),Panc-AdenoCA(2),Prost-AdenoCA(2),Eso-AdenoCA(1),Myeloid-MPN(1),Skin-Melanoma(1)
DISRUPTION	'CTD-2130O13.1	14	Breast-AdenoCA(4),Ovary-AdenoCA(4),Lung-SCC(2),Panc-AdenoCA(2),CNS-Medullo(1),Liver-HCC(1)
DISRUPTION	'CTD-2143L24.1	14	Uterus-AdenoCA(3),Panc-AdenoCA(2),Skin-Melanoma(2),SoftTissue-Liposarc(2),Bone-Osteosarc(1),Breast-AdenoCA(1),Kidney-ChRCC(1),Liver-HCC(1),Ovary-AdenoCA(1)
DISRUPTION	'CTD-3138F19.1	14	Breast-AdenoCA(2),Liver-HCC(2),Ovary-AdenoCA(2),Panc-AdenoCA(2),Prost-AdenoCA(2),Biliary-AdenoCA(1),Lung-AdenoCA(1),SoftTissue-Liposarc(1),Uterus-AdenoCA(1)
DISRUPTION	'DEPTOR	14	Ovary-AdenoCA(3),Prost-AdenoCA(3),Eso-AdenoCA(2),Bone-Osteosarc(1),Breast-AdenoCA(1),Liver-HCC(1),SoftTissue-Liposarc(1),Stomach-AdenoCA(1),Uterus-AdenoCA(1)
DISRUPTION	'DOK5	14	Breast-AdenoCA(6),Stomach-AdenoCA(3),Bone-Osteosarc(1),CNS-Medullo(1),Lung-AdenoCA(1),Myeloid-MPN(1),Skin-Melanoma(1)
DISRUPTION	'EBF1	14	Prost-AdenoCA(3),Eso-AdenoCA(2),Liver-HCC(2),Ovary-AdenoCA(2),Stomach-AdenoCA(2),CNS-Medullo(1),Panc-AdenoCA(1),SoftTissue-Liposarc(1)
DISRUPTION	'EIF4G3	14	Stomach-AdenoCA(3),Breast-AdenoCA(2),Liver-HCC(2),Ovary-AdenoCA(2),Biliary-AdenoCA(1),Eso-AdenoCA(1),Panc-AdenoCA(1),Skin-Melanoma(1),SoftTissue-Liposarc(1)
DISRUPTION	'ESR1	14	Breast-AdenoCA(4),Ovary-AdenoCA(4),Uterus-AdenoCA(3),Bone-Osteosarc(1),Panc-AdenoCA(1),SoftTissue-Liposarc(1)
DISRUPTION	'EXOC6B	14	Prost-AdenoCA(6),Ovary-AdenoCA(2),Skin-Melanoma(2),Head-SCC(1),Liver-HCC(1),Panc-AdenoCA(1),Stomach-AdenoCA(1)
DISRUPTION	'FHOD3	14	Skin-Melanoma(3),Eso-AdenoCA(2),Ovary-AdenoCA(2),Prost-AdenoCA(2),Breast-AdenoCA(1),CNS-Medullo(1),ColoRect-AdenoCA(1),Panc-AdenoCA(1),Stomach-AdenoCA(1)
DISRUPTION	'GHR	14	Prost-AdenoCA(5),Panc-AdenoCA(3),Bone-Osteosarc(2),SoftTissue-Liposarc(2),ColoRect-AdenoCA(1),Skin-Melanoma(1)
DISRUPTION	'GMDS-AS1	14	Ovary-AdenoCA(4),Panc-AdenoCA(2),Breast-AdenoCA(1),ColoRect-AdenoCA(1),Head-SCC(1),Lung-SCC(1),Lymph-BNHL(1),Prost-AdenoCA(1),Skin-Melanoma(1),SoftTissue-Liposarc(1)
DISRUPTION	'HECW1	14	Skin-Melanoma(4),Panc-AdenoCA(2),Prost-AdenoCA(2),Bone-Osteosarc(1),Breast-AdenoCA(1),CNS-GBM(1),Head-SCC(1),SoftTissue-Liposarc(1),Stomach-AdenoCA(1)
DISRUPTION	'IFLTD1	14	Panc-AdenoCA(4),Stomach-AdenoCA(3),Breast-AdenoCA(2),Eso-AdenoCA(2),Ovary-AdenoCA(2),Lymph-BNHL(1)
DISRUPTION	'IGF2R	14	Breast-AdenoCA(4),Eso-AdenoCA(2),Stomach-AdenoCA(2),Biliary-AdenoCA(1),Bone-Osteosarc(1),ColoRect-AdenoCA(1),Lymph-CLL(1),Panc-AdenoCA(1),Prost-AdenoCA(1)
DISRUPTION	'KCNN3	14	Eso-AdenoCA(2),Liver-HCC(2),SoftTissue-Liposarc(2),Biliary-AdenoCA(1),Breast-AdenoCA(1),CNS-Medullo(1),ColoRect-AdenoCA(1),Ovary-AdenoCA(1),Prost-AdenoCA(1),Skin-Melanoma(1),Stomach-AdenoCA(1)
DISRUPTION	'KCNQ1	14	Panc-AdenoCA(4),Liver-HCC(3),Skin-Melanoma(2),ColoRect-AdenoCA(1),Eso-AdenoCA(1),Panc-Endocrine(1),Prost-AdenoCA(1),SoftTissue-Liposarc(1)
DISRUPTION	'KCTD7	14	Ovary-AdenoCA(4),Stomach-AdenoCA(3),Bone-Osteosarc(1),Breast-LobularCA(1),Liver-HCC(1),Lung-SCC(1),Panc-AdenoCA(1),Skin-Melanoma(1),SoftTissue-Liposarc(1)
DISRUPTION	'KDM2A	14	Breast-AdenoCA(3),Skin-Melanoma(3),Ovary-AdenoCA(2),Biliary-AdenoCA(1),Breast-LobularCA(1),Eso-AdenoCA(1),Panc-Endocrine(1),SoftTissue-Liposarc(1),Stomach-AdenoCA(1)
DISRUPTION	'KIAA0825	14	Prost-AdenoCA(4),Breast-AdenoCA(2),Kidney-RCC(2),Panc-AdenoCA(2),Eso-AdenoCA(1),Liver-HCC(1),Ovary-AdenoCA(1),SoftTissue-Liposarc(1)
DISRUPTION	'KIAA1217	14	Ovary-AdenoCA(5),Breast-AdenoCA(3),Eso-AdenoCA(2),Panc-AdenoCA(2),CNS-GBM(1),Skin-Melanoma(1)
DISRUPTION	'KLHL32	14	Liver-HCC(3),Breast-AdenoCA(2),Panc-AdenoCA(2),Bone-Osteosarc(1),Cervix-SCC(1),Eso-AdenoCA(1),Ovary-AdenoCA(1),Skin-Melanoma(1),SoftTissue-Liposarc(1),Uterus-AdenoCA(1)
DISRUPTION	'LHFPL3	14	Breast-AdenoCA(2),Eso-AdenoCA(2),Ovary-AdenoCA(2),Bone-Osteosarc(1),CNS-GBM(1),Kidney-RCC(1),Lung-SCC(1),Panc-AdenoCA(1),Skin-Melanoma(1),SoftTissue-Liposarc(1),Stomach-AdenoCA(1)
DISRUPTION	'LINC00662	14	Breast-AdenoCA(2),Eso-AdenoCA(2),Panc-AdenoCA(2),Skin-Melanoma(2),Bone-Osteosarc(1),Liver-HCC(1),Lung-SCC(1),Lymph-BNHL(1),Prost-AdenoCA(1),Stomach-AdenoCA(1)
DISRUPTION	'LIPE-AS1	14	Ovary-AdenoCA(4),Prost-AdenoCA(3),Bone-Osteosarc(1),Breast-AdenoCA(1),CNS-GBM(1),Eso-AdenoCA(1),Liver-HCC(1),Panc-AdenoCA(1),Stomach-AdenoCA(1)
DISRUPTION	'LY86-AS1	14	Ovary-AdenoCA(4),Skin-Melanoma(4),Breast-AdenoCA(2),Liver-HCC(2),Bladder-TCC(1),ColoRect-AdenoCA(1)
DISRUPTION	'MANBA	14	Prost-AdenoCA(9),Bone-Benign(1),Breast-AdenoCA(1),Lung-AdenoCA(1),Panc-AdenoCA(1),Skin-Melanoma(1)
DISRUPTION	'MAPK4	14	Panc-AdenoCA(5),Breast-AdenoCA(3),Eso-AdenoCA(2),Cervix-SCC(1),Skin-Melanoma(1),SoftTissue-Leiomyo(1),Stomach-AdenoCA(1)
DISRUPTION	'MARS	14	CNS-GBM(5),SoftTissue-Liposarc(4),Bone-Osteosarc(2),Breast-AdenoCA(2),Liver-HCC(1)
DISRUPTION	'MCC	14	Ovary-AdenoCA(4),Prost-AdenoCA(2),Stomach-AdenoCA(2),Breast-AdenoCA(1),Liver-HCC(1),Lymph-BNHL(1),Panc-AdenoCA(1),Skin-Melanoma(1),SoftTissue-Liposarc(1)
DISRUPTION	'MCF2L2	14	Lung-SCC(6),Liver-HCC(2),Breast-AdenoCA(1),CNS-Medullo(1),Ovary-AdenoCA(1),Panc-AdenoCA(1),Skin-Melanoma(1),SoftTissue-Liposarc(1)
DISRUPTION	'MED12L	14	Prost-AdenoCA(5),Breast-AdenoCA(3),Ovary-AdenoCA(2),Panc-AdenoCA(2),Liver-HCC(1),Lung-AdenoCA(1)
DISRUPTION	'MELK	14	Panc-AdenoCA(3),Lung-SCC(2),Ovary-AdenoCA(2),Breast-AdenoCA(1),Liver-HCC(1),Lymph-BNHL(1),Skin-Melanoma(1),SoftTissue-Liposarc(1),Stomach-AdenoCA(1),Uterus-AdenoCA(1)
DISRUPTION	'MKLN1	14	Skin-Melanoma(3),Ovary-AdenoCA(2),Prost-AdenoCA(2),Biliary-AdenoCA(1),CNS-GBM(1),Eso-AdenoCA(1),Kidney-RCC(1),Lung-SCC(1),SoftTissue-Liposarc(1),Uterus-AdenoCA(1)
DISRUPTION	'MLLT4	14	Prost-AdenoCA(5),Breast-AdenoCA(3),Eso-AdenoCA(2),Lymph-BNHL(1),Ovary-AdenoCA(1),Stomach-AdenoCA(1),Uterus-AdenoCA(1)
DISRUPTION	'MOB3B	14	Lymph-BNHL(3),Eso-AdenoCA(2),Biliary-AdenoCA(1),Breast-AdenoCA(1),Liver-HCC(1),Lung-SCC(1),Panc-AdenoCA(1),Panc-Endocrine(1),Prost-AdenoCA(1),Skin-Melanoma(1),Stomach-AdenoCA(1)
DISRUPTION	'MSR1	14	Prost-AdenoCA(3),Breast-AdenoCA(2),Lung-AdenoCA(2),Panc-AdenoCA(2),ColoRect-AdenoCA(1),Liver-HCC(1),Lymph-BNHL(1),Panc-Endocrine(1),SoftTissue-Liposarc(1)
DISRUPTION	'MUC19	14	SoftTissue-Liposarc(3),Eso-AdenoCA(2),Prost-AdenoCA(2),Stomach-AdenoCA(2),Bone-Osteosarc(1),ColoRect-AdenoCA(1),Kidney-RCC(1),Lung-SCC(1),Panc-AdenoCA(1)
DISRUPTION	'MYO18B	14	Breast-AdenoCA(4),Liver-HCC(2),Stomach-AdenoCA(2),Bladder-TCC(1),CNS-GBM(1),Eso-AdenoCA(1),Panc-AdenoCA(1),Prost-AdenoCA(1),Skin-Melanoma(1)
DISRUPTION	'MYO5C	14	Prost-AdenoCA(5),Breast-AdenoCA(2),Eso-AdenoCA(1),Head-SCC(1),Ovary-AdenoCA(1),Skin-Melanoma(1),SoftTissue-Leiomyo(1),SoftTissue-Liposarc(1),Stomach-AdenoCA(1)
DISRUPTION	'NCOA2	14	Liver-HCC(4),Ovary-AdenoCA(3),Breast-AdenoCA(2),Panc-AdenoCA(2),Eso-AdenoCA(1),Kidney-ChRCC(1),Skin-Melanoma(1)
DISRUPTION	'NCOR1	14	Bone-Osteosarc(2),Prost-AdenoCA(2),Uterus-AdenoCA(2),Bladder-TCC(1),Bone-Benign(1),Breast-AdenoCA(1),Eso-AdenoCA(1),Head-SCC(1),Liver-HCC(1),Lung-SCC(1),Skin-Melanoma(1)
DISRUPTION	'NIPBL	14	Breast-AdenoCA(4),Bladder-TCC(1),Bone-Osteosarc(1),Eso-AdenoCA(1),Liver-HCC(1),Lung-AdenoCA(1),Ovary-AdenoCA(1),Skin-Melanoma(1),SoftTissue-Liposarc(1),Stomach-AdenoCA(1),Uterus-AdenoCA(1)
DISRUPTION	'OMA1	14	Prost-AdenoCA(10),Breast-AdenoCA(1),Ovary-AdenoCA(1),Panc-AdenoCA(1),SoftTissue-Liposarc(1)
DISRUPTION	'OS9	14	SoftTissue-Liposarc(8),CNS-GBM(3),Eso-AdenoCA(1),Lung-AdenoCA(1),Stomach-AdenoCA(1)
DISRUPTION	'PACRG	14	Breast-AdenoCA(2),CNS-GBM(2),Prost-AdenoCA(2),Bone-Osteosarc(1),Eso-AdenoCA(1),Kidney-RCC(1),Liver-HCC(1),Lung-SCC(1),Lymph-CLL(1),Skin-Melanoma(1),Uterus-AdenoCA(1)
DISRUPTION	'PARP8	14	Liver-HCC(3),Prost-AdenoCA(3),Breast-AdenoCA(2),Ovary-AdenoCA(2),CNS-Medullo(1),Kidney-ChRCC(1),SoftTissue-Liposarc(1),Stomach-AdenoCA(1)
DISRUPTION	'PCSK2	14	Ovary-AdenoCA(3),Skin-Melanoma(3),Biliary-AdenoCA(1),Breast-AdenoCA(1),Eso-AdenoCA(1),Lung-AdenoCA(1),Lung-SCC(1),Panc-AdenoCA(1),SoftTissue-Liposarc(1),Stomach-AdenoCA(1)
DISRUPTION	'PDZRN3	14	Breast-AdenoCA(4),Prost-AdenoCA(3),Biliary-AdenoCA(1),Bone-Osteosarc(1),Eso-AdenoCA(1),Kidney-RCC(1),Ovary-AdenoCA(1),Skin-Melanoma(1),SoftTissue-Liposarc(1)
DISRUPTION	'PKHD1L1	14	Ovary-AdenoCA(5),Breast-AdenoCA(2),Liver-HCC(2),Stomach-AdenoCA(2),CNS-Medullo(1),Skin-Melanoma(1),SoftTissue-Liposarc(1)
DISRUPTION	'PLCB4	14	Ovary-AdenoCA(3),Skin-Melanoma(3),Liver-HCC(2),Panc-AdenoCA(2),Breast-AdenoCA(1),SoftTissue-Leiomyo(1),Stomach-AdenoCA(1),Uterus-AdenoCA(1)
DISRUPTION	'PPP1R3A	14	Eso-AdenoCA(2),Kidney-RCC(2),Ovary-AdenoCA(2),Bone-Osteosarc(1),Breast-AdenoCA(1),Breast-LobularCA(1),Liver-HCC(1),Panc-AdenoCA(1),Prost-AdenoCA(1),SoftTissue-Liposarc(1),Stomach-AdenoCA(1)
DISRUPTION	'PPP1R9A	14	Breast-AdenoCA(2),Kidney-RCC(2),Ovary-AdenoCA(2),Bone-Osteosarc(1),CNS-GBM(1),Liver-HCC(1),Lung-AdenoCA(1),Panc-AdenoCA(1),Prost-AdenoCA(1),Skin-Melanoma(1),Stomach-AdenoCA(1)
DISRUPTION	'RALY	14	Breast-AdenoCA(6),Ovary-AdenoCA(5),Eso-AdenoCA(1),Panc-AdenoCA(1),Stomach-AdenoCA(1)
DISRUPTION	'RARA	14	Breast-AdenoCA(6),Lung-SCC(2),CNS-Medullo(1),Cervix-SCC(1),Eso-AdenoCA(1),Head-SCC(1),Skin-Melanoma(1),Stomach-AdenoCA(1)
DISRUPTION	'RAVER2	14	Prost-AdenoCA(10),Breast-AdenoCA(1),Eso-AdenoCA(1),Panc-Endocrine(1),Skin-Melanoma(1)
DISRUPTION	'RBL1	14	Breast-AdenoCA(3),Prost-AdenoCA(2),Stomach-AdenoCA(2),Bladder-TCC(1),Cervix-SCC(1),ColoRect-AdenoCA(1),Eso-AdenoCA(1),Lymph-BNHL(1),Ovary-AdenoCA(1),Panc-AdenoCA(1)
DISRUPTION	'RCAN2	14	Skin-Melanoma(4),Breast-AdenoCA(3),Liver-HCC(2),Panc-AdenoCA(2),Prost-AdenoCA(2),Lung-AdenoCA(1)
DISRUPTION	'RFWD2	14	Skin-Melanoma(3),SoftTissue-Liposarc(3),Bone-Osteosarc(2),Breast-AdenoCA(2),Liver-HCC(2),Lymph-BNHL(1),Panc-AdenoCA(1)
DISRUPTION	'RGL1	14	Breast-AdenoCA(4),SoftTissue-Liposarc(3),Biliary-AdenoCA(2),Liver-HCC(1),Lung-AdenoCA(1),Ovary-AdenoCA(1),Panc-Endocrine(1),Stomach-AdenoCA(1)
DISRUPTION	'RGS5	14	Breast-AdenoCA(2),Liver-HCC(2),Prost-AdenoCA(2),Skin-Melanoma(2),Bladder-TCC(1),Bone-Osteosarc(1),Lung-AdenoCA(1),Lymph-BNHL(1),SoftTissue-Liposarc(1),Uterus-AdenoCA(1)
DISRUPTION	'ROS1	14	Prost-AdenoCA(9),Bone-Osteosarc(1),Eso-AdenoCA(1),Liver-HCC(1),Panc-AdenoCA(1),SoftTissue-Liposarc(1)
DISRUPTION	'RP11-110A12.2	14	Ovary-AdenoCA(4),SoftTissue-Liposarc(4),Panc-AdenoCA(3),Stomach-AdenoCA(2),Breast-AdenoCA(1)
DISRUPTION	'RP11-122F24.1	14	Panc-AdenoCA(3),SoftTissue-Liposarc(3),Bladder-TCC(1),Kidney-ChRCC(1),Liver-HCC(1),Lymph-BNHL(1),Panc-Endocrine(1),Prost-AdenoCA(1),Skin-Melanoma(1),Stomach-AdenoCA(1)
DISRUPTION	'RP11-152K4.2	14	SoftTissue-Liposarc(4),Skin-Melanoma(3),Bone-Osteosarc(2),Breast-AdenoCA(2),Eso-AdenoCA(1),Lung-AdenoCA(1),Ovary-AdenoCA(1)
DISRUPTION	'RP11-192H23.4	14	Breast-AdenoCA(4),Eso-AdenoCA(2),Skin-Melanoma(2),Bone-Osteosarc(1),ColoRect-AdenoCA(1),Head-SCC(1),Liver-HCC(1),Ovary-AdenoCA(1),Panc-AdenoCA(1)
DISRUPTION	'RP11-314P15.2	14	Breast-AdenoCA(3),Panc-AdenoCA(2),Skin-Melanoma(2),Biliary-AdenoCA(1),Bone-Osteosarc(1),Eso-AdenoCA(1),Kidney-RCC(1),Liver-HCC(1),Ovary-AdenoCA(1),Uterus-AdenoCA(1)
DISRUPTION	'RP11-384F7.1	14	Lung-SCC(4),Panc-AdenoCA(2),Breast-AdenoCA(1),CNS-Medullo(1),Head-SCC(1),Lymph-BNHL(1),Ovary-AdenoCA(1),Prost-AdenoCA(1),Skin-Melanoma(1),SoftTissue-Leiomyo(1)
DISRUPTION	'RP11-405A12.2	14	Ovary-AdenoCA(3),Breast-AdenoCA(2),Eso-AdenoCA(2),Panc-AdenoCA(2),Bladder-TCC(1),CNS-Medullo(1),Lung-AdenoCA(1),Prost-AdenoCA(1),Stomach-AdenoCA(1)
DISRUPTION	'RP11-444E17.6	14	Prost-AdenoCA(3),Breast-AdenoCA(2),SoftTissue-Liposarc(2),Bone-Osteosarc(1),CNS-GBM(1),Eso-AdenoCA(1),Liver-HCC(1),Lymph-BNHL(1),Stomach-AdenoCA(1),Uterus-AdenoCA(1)
DISRUPTION	'RP11-452H21.1	14	Skin-Melanoma(6),Breast-AdenoCA(4),Ovary-AdenoCA(2),Biliary-AdenoCA(1),Breast-LobularCA(1)
DISRUPTION	'RP11-511B23.2	14	Eso-AdenoCA(3),SoftTissue-Liposarc(3),Breast-AdenoCA(2),Ovary-AdenoCA(2),ColoRect-AdenoCA(1),Liver-HCC(1),Prost-AdenoCA(1),Skin-Melanoma(1)
DISRUPTION	'RP11-542B15.1	14	Breast-AdenoCA(3),Skin-Melanoma(3),SoftTissue-Liposarc(3),Stomach-AdenoCA(2),Bone-Osteosarc(1),CNS-GBM(1),Lung-AdenoCA(1)
DISRUPTION	'RP11-54D18.3	14	Prost-AdenoCA(3),Eso-AdenoCA(2),Lung-SCC(2),Breast-AdenoCA(1),Liver-HCC(1),Lung-AdenoCA(1),Lymph-BNHL(1),Ovary-AdenoCA(1),SoftTissue-Leiomyo(1),Stomach-AdenoCA(1)
DISRUPTION	'RP11-563P16.1	14	Prost-AdenoCA(4),Bone-Osteosarc(2),Breast-AdenoCA(2),Ovary-AdenoCA(2),Skin-Melanoma(2),Liver-HCC(1),Lung-SCC(1)
DISRUPTION	'RP11-571M6.7	14	SoftTissue-Liposarc(8),CNS-GBM(3),Eso-AdenoCA(1),Lung-AdenoCA(1),Stomach-AdenoCA(1)
DISRUPTION	'RP11-598P20.5	14	Prost-AdenoCA(3),Breast-AdenoCA(2),Panc-AdenoCA(2),Breast-LobularCA(1),ColoRect-AdenoCA(1),Eso-AdenoCA(1),Liver-HCC(1),Lung-AdenoCA(1),Skin-Melanoma(1),SoftTissue-Liposarc(1)
DISRUPTION	'RP11-624L4.1	14	Breast-AdenoCA(3),Panc-AdenoCA(3),Bone-Osteosarc(2),Bladder-TCC(1),Liver-HCC(1),Lung-SCC(1),Lymph-BNHL(1),Prost-AdenoCA(1),Stomach-AdenoCA(1)
DISRUPTION	'RP11-745C15.2	14	CNS-GBM(6),Breast-AdenoCA(2),Eso-AdenoCA(2),Liver-HCC(1),Lung-AdenoCA(1),Ovary-AdenoCA(1),SoftTissue-Liposarc(1)
DISRUPTION	'RP11-753H16.5	14	SoftTissue-Liposarc(4),Panc-AdenoCA(3),Liver-HCC(2),Ovary-AdenoCA(2),Prost-AdenoCA(1),Skin-Melanoma(1),Uterus-AdenoCA(1)
DISRUPTION	'RP11-820L6.1	14	Ovary-AdenoCA(3),Panc-AdenoCA(2),Prost-AdenoCA(2),Skin-Melanoma(2),Breast-AdenoCA(1),CNS-GBM(1),Eso-AdenoCA(1),Liver-HCC(1),Stomach-AdenoCA(1)
DISRUPTION	'RP11-94P11.4	14	Bone-Osteosarc(2),Breast-AdenoCA(2),Ovary-AdenoCA(2),Skin-Melanoma(2),Eso-AdenoCA(1),Liver-HCC(1),Lung-SCC(1),Panc-AdenoCA(1),SoftTissue-Liposarc(1),Uterus-AdenoCA(1)
DISRUPTION	'RREB1	14	Breast-AdenoCA(3),Skin-Melanoma(3),Ovary-AdenoCA(2),Panc-AdenoCA(2),Prost-AdenoCA(2),Head-SCC(1),Stomach-AdenoCA(1)
DISRUPTION	'SAMD5	14	Eso-AdenoCA(5),Stomach-AdenoCA(4),Bone-Osteosarc(2),Panc-AdenoCA(1),Prost-AdenoCA(1),SoftTissue-Leiomyo(1)
DISRUPTION	'SHISA6	14	Panc-AdenoCA(4),Ovary-AdenoCA(2),Skin-Melanoma(2),Bone-Osteosarc(1),Liver-HCC(1),Lymph-BNHL(1),Prost-AdenoCA(1),SoftTissue-Liposarc(1),Stomach-AdenoCA(1)
DISRUPTION	'SLC47A1	14	Prost-AdenoCA(5),Bone-Osteosarc(2),Breast-AdenoCA(1),CNS-GBM(1),Eso-AdenoCA(1),Liver-HCC(1),Ovary-AdenoCA(1),Panc-AdenoCA(1),Skin-Melanoma(1)
DISRUPTION	'SPAG17	14	Eso-AdenoCA(2),Lung-SCC(2),Ovary-AdenoCA(2),Panc-AdenoCA(2),Skin-Melanoma(2),Breast-AdenoCA(1),Breast-LobularCA(1),Liver-HCC(1),SoftTissue-Leiomyo(1)
DISRUPTION	'SRGAP1	14	SoftTissue-Liposarc(4),Breast-AdenoCA(3),CNS-GBM(2),Bone-Osteosarc(1),Ovary-AdenoCA(1),Panc-AdenoCA(1),Skin-Melanoma(1),Stomach-AdenoCA(1)
DISRUPTION	'SVIL	14	Ovary-AdenoCA(3),Uterus-AdenoCA(3),Skin-Melanoma(2),ColoRect-AdenoCA(1),Eso-AdenoCA(1),Head-SCC(1),Lymph-BNHL(1),Panc-AdenoCA(1),SoftTissue-Leiomyo(1)
DISRUPTION	'SYN2	14	Prost-AdenoCA(4),Breast-AdenoCA(2),Bone-Osteosarc(1),CNS-Oligo(1),Liver-HCC(1),Lung-SCC(1),Panc-AdenoCA(1),SoftTissue-Liposarc(1),Stomach-AdenoCA(1),Uterus-AdenoCA(1)
DISRUPTION	'SYNE2	14	Liver-HCC(3),Bone-Osteosarc(2),Breast-AdenoCA(2),Panc-AdenoCA(2),Biliary-AdenoCA(1),Cervix-SCC(1),Lung-AdenoCA(1),Lymph-BNHL(1),Prost-AdenoCA(1)
DISRUPTION	'TARBP1	14	Ovary-AdenoCA(3),Panc-AdenoCA(3),Breast-AdenoCA(2),Prost-AdenoCA(2),Eso-AdenoCA(1),Liver-HCC(1),Lung-SCC(1),Lymph-BNHL(1)
DISRUPTION	'TBC1D4	14	Prost-AdenoCA(5),Breast-AdenoCA(3),Panc-AdenoCA(3),Stomach-AdenoCA(2),Lung-SCC(1)
DISRUPTION	'TCF20	14	Panc-AdenoCA(3),Breast-AdenoCA(2),Eso-AdenoCA(2),Panc-Endocrine(2),Bone-Osteosarc(1),Liver-HCC(1),Ovary-AdenoCA(1),Prost-AdenoCA(1),Skin-Melanoma(1)
DISRUPTION	'TCHP	14	Prost-AdenoCA(5),Liver-HCC(3),Ovary-AdenoCA(2),Breast-AdenoCA(1),Eso-AdenoCA(1),Panc-AdenoCA(1),Uterus-AdenoCA(1)
DISRUPTION	'TEX41	14	Prost-AdenoCA(4),Lung-SCC(2),Skin-Melanoma(2),Breast-AdenoCA(1),ColoRect-AdenoCA(1),Eso-AdenoCA(1),SoftTissue-Liposarc(1),Stomach-AdenoCA(1),Uterus-AdenoCA(1)
DISRUPTION	'TMC1	14	Breast-AdenoCA(2),Eso-AdenoCA(2),Liver-HCC(2),Prost-AdenoCA(2),SoftTissue-Liposarc(2),Bladder-TCC(1),Lymph-BNHL(1),Ovary-AdenoCA(1),Skin-Melanoma(1)
DISRUPTION	'TMEM135	14	Skin-Melanoma(3),Breast-AdenoCA(2),Liver-HCC(2),Bone-Osteosarc(1),Eso-AdenoCA(1),Lung-AdenoCA(1),Lung-SCC(1),Ovary-AdenoCA(1),SoftTissue-Liposarc(1),Stomach-AdenoCA(1)
DISRUPTION	'TMEM178B	14	Skin-Melanoma(3),Breast-AdenoCA(2),Ovary-AdenoCA(2),Bone-Osteosarc(1),Liver-HCC(1),Lung-SCC(1),Panc-AdenoCA(1),Prost-AdenoCA(1),SoftTissue-Leiomyo(1),SoftTissue-Liposarc(1)
DISRUPTION	'TNIK	14	Liver-HCC(3),Ovary-AdenoCA(3),Prost-AdenoCA(2),Bone-Osteosarc(1),Breast-AdenoCA(1),Eso-AdenoCA(1),Lung-SCC(1),Panc-AdenoCA(1),Stomach-AdenoCA(1)
DISRUPTION	'TP63	14	Breast-AdenoCA(4),Lung-SCC(3),Prost-AdenoCA(2),CNS-GBM(1),Eso-AdenoCA(1),Head-SCC(1),Skin-Melanoma(1),Stomach-AdenoCA(1)
DISRUPTION	'TSPAN31	14	SoftTissue-Liposarc(8),CNS-GBM(4),Skin-Melanoma(1),Stomach-AdenoCA(1)
DISRUPTION	'TTN	14	Liver-HCC(2),Ovary-AdenoCA(2),Prost-AdenoCA(2),Bone-Benign(1),Bone-Osteosarc(1),Breast-AdenoCA(1),Eso-AdenoCA(1),Head-SCC(1),Panc-Endocrine(1),SoftTissue-Leiomyo(1),Stomach-AdenoCA(1)
DISRUPTION	'UBE2E2	14	Ovary-AdenoCA(4),Uterus-AdenoCA(2),Breast-AdenoCA(1),ColoRect-AdenoCA(1),Liver-HCC(1),Lung-SCC(1),Prost-AdenoCA(1),Skin-Melanoma(1),SoftTissue-Liposarc(1),Stomach-AdenoCA(1)
DISRUPTION	'UCK2	14	Prost-AdenoCA(5),Ovary-AdenoCA(3),Bone-Osteosarc(2),Eso-AdenoCA(1),Lung-AdenoCA(1),Skin-Melanoma(1),SoftTissue-Liposarc(1)
DISRUPTION	'UNC80	14	Prost-AdenoCA(13),Liver-HCC(1)
DISRUPTION	'USP45	14	Prost-AdenoCA(9),SoftTissue-Liposarc(2),Breast-AdenoCA(1),Cervix-SCC(1),Liver-HCC(1)
DISRUPTION	'VWC2	14	Prost-AdenoCA(9),Breast-AdenoCA(2),CNS-GBM(2),Uterus-AdenoCA(1)
DISRUPTION	'WDR70	14	Breast-AdenoCA(3),Skin-Melanoma(3),Bone-Osteosarc(2),SoftTissue-Liposarc(2),Eso-AdenoCA(1),Head-SCC(1),Liver-HCC(1),Stomach-AdenoCA(1)
DISRUPTION	'ZFHX3	14	Breast-AdenoCA(2),Bone-Osteosarc(1),Eso-AdenoCA(1),Head-SCC(1),Kidney-ChRCC(1),Liver-HCC(1),Lung-AdenoCA(1),Lymph-BNHL(1),Ovary-AdenoCA(1),Panc-AdenoCA(1),Prost-AdenoCA(1),SoftTissue-Leiomyo(1),Uterus-AdenoCA(1)
DISRUPTION	'ZFHX4-AS1	14	Stomach-AdenoCA(3),Breast-AdenoCA(2),Lung-AdenoCA(2),Ovary-AdenoCA(2),ColoRect-AdenoCA(1),Eso-AdenoCA(1),Kidney-RCC(1),Panc-AdenoCA(1),SoftTissue-Liposarc(1)
DISRUPTION	'ZMIZ1	14	Breast-AdenoCA(5),Stomach-AdenoCA(2),Bladder-TCC(1),Eso-AdenoCA(1),Liver-HCC(1),Lung-SCC(1),Lymph-BNHL(1),Panc-AdenoCA(1),Prost-AdenoCA(1)
DISRUPTION	'ZMYND8	14	ColoRect-AdenoCA(3),Breast-AdenoCA(2),Uterus-AdenoCA(2),Bladder-TCC(1),Eso-AdenoCA(1),Lung-SCC(1),Ovary-AdenoCA(1),Panc-AdenoCA(1),Skin-Melanoma(1),SoftTissue-Liposarc(1)
EXON_SKIP	'CDKAL1	14	Breast-AdenoCA(2),Head-SCC(2),Liver-HCC(2),Bone-Osteosarc(1),ColoRect-AdenoCA(1),Eso-AdenoCA(1),Lung-AdenoCA(1),Lymph-CLL(1),Panc-AdenoCA(1),SoftTissue-Liposarc(1),Stomach-AdenoCA(1)
EXON_SKIP	'CNTN5	14	Breast-AdenoCA(3),Head-SCC(2),Skin-Melanoma(2),CNS-GBM(1),Cervix-SCC(1),Eso-AdenoCA(1),Liver-HCC(1),Ovary-AdenoCA(1),Prost-AdenoCA(1),SoftTissue-Leiomyo(1)
EXON_SKIP	'CTNNA2	14	Liver-HCC(3),Skin-Melanoma(3),Breast-AdenoCA(2),Ovary-AdenoCA(2),ColoRect-AdenoCA(1),Lung-SCC(1),Panc-AdenoCA(1),Panc-Endocrine(1)
EXON_SKIP	'DPP10	14	Eso-AdenoCA(4),Prost-AdenoCA(3),Kidney-RCC(2),Bone-Osteosarc(1),ColoRect-AdenoCA(1),Lung-SCC(1),Ovary-AdenoCA(1),Panc-Endocrine(1)
EXON_SKIP	'FAF1	14	Eso-AdenoCA(3),Liver-HCC(3),Breast-AdenoCA(2),ColoRect-AdenoCA(1),Head-SCC(1),Lung-AdenoCA(1),Lymph-BNHL(1),Panc-Endocrine(1),Stomach-AdenoCA(1)
EXON_SKIP	'MUC19	14	Prost-AdenoCA(10),Eso-AdenoCA(2),Ovary-AdenoCA(1),Stomach-AdenoCA(1)
EXON_SKIP	'NLGN1	14	Prost-AdenoCA(9),Breast-AdenoCA(2),Lung-SCC(1),Panc-AdenoCA(1),Stomach-AdenoCA(1)
EXON_SKIP	'ZFAND3	14	Prost-AdenoCA(10),Breast-AdenoCA(1),Breast-LobularCA(1),Head-SCC(1),Liver-HCC(1)
ITD	'KIAA0825	14	Prost-AdenoCA(9),Breast-AdenoCA(2),Eso-AdenoCA(1),Ovary-AdenoCA(1),Stomach-AdenoCA(1)
ITD	'RABGAP1L	14	Eso-AdenoCA(3),Panc-AdenoCA(3),Breast-AdenoCA(2),Stomach-AdenoCA(2),Bone-Osteosarc(1),ColoRect-AdenoCA(1),Lung-SCC(1),Ovary-AdenoCA(1)
ITD	'RBFOX1	14	Prost-AdenoCA(5),Breast-AdenoCA(3),Ovary-AdenoCA(2),Liver-HCC(1),Lung-SCC(1),Lymph-BNHL(1),Stomach-AdenoCA(1)
ITD	'WWOX	14	Panc-AdenoCA(5),Eso-AdenoCA(3),Lymph-BNHL(2),Bone-Osteosarc(1),Breast-AdenoCA(1),Ovary-AdenoCA(1),Stomach-AdenoCA(1)
DYSFUNCTIONAL_FUSION	'SUMF1:ITPR1	14	Stomach-AdenoCA(4),Breast-AdenoCA(3),Eso-AdenoCA(3),ColoRect-AdenoCA(1),Lung-AdenoCA(1),Prost-AdenoCA(1),Uterus-AdenoCA(1)
FUSION_5	'ADAM22	14	Prost-AdenoCA(4),Breast-AdenoCA(3),Liver-HCC(2),Skin-Melanoma(2),Bone-Osteosarc(1),Panc-AdenoCA(1),Uterus-AdenoCA(1)
FUSION_5	'ANO1	14	Skin-Melanoma(5),Breast-AdenoCA(4),Eso-AdenoCA(2),Bladder-TCC(1),Head-SCC(1),Liver-HCC(1)
FUSION_5	'ARID1A	14	CNS-GBM(3),Breast-AdenoCA(2),Liver-HCC(2),Lung-SCC(2),Panc-AdenoCA(2),Ovary-AdenoCA(1),Prost-AdenoCA(1),Uterus-AdenoCA(1)
FUSION_5	'BNC2	14	Breast-AdenoCA(4),Skin-Melanoma(4),Ovary-AdenoCA(2),Panc-AdenoCA(2),Prost-AdenoCA(2)
FUSION_5	'CCDC171	14	Eso-AdenoCA(2),Liver-HCC(2),Lung-SCC(2),Ovary-AdenoCA(2),Bladder-TCC(1),Breast-AdenoCA(1),Lymph-BNHL(1),Panc-Endocrine(1),Prost-AdenoCA(1),Skin-Melanoma(1)
FUSION_5	'CDH18	14	SoftTissue-Liposarc(6),Skin-Melanoma(4),Bone-Osteosarc(1),Liver-HCC(1),Lung-SCC(1),Lymph-BNHL(1)
FUSION_5	'CEP164P1	14	Prost-AdenoCA(9),Bone-Osteosarc(1),Eso-AdenoCA(1),Ovary-AdenoCA(1),Panc-AdenoCA(1),Thy-AdenoCA(1)
FUSION_5	'CPQ	14	Breast-AdenoCA(5),Uterus-AdenoCA(2),Bone-Osteosarc(1),Head-SCC(1),Liver-HCC(1),Lung-AdenoCA(1),Panc-AdenoCA(1),SoftTissue-Liposarc(1),Stomach-AdenoCA(1)
FUSION_5	'CTD-2021H9.2	14	SoftTissue-Liposarc(6),Skin-Melanoma(3),Bone-Osteosarc(1),Breast-AdenoCA(1),Eso-AdenoCA(1),Lung-SCC(1),Uterus-AdenoCA(1)
FUSION_5	'DCLK1	14	Prost-AdenoCA(6),Breast-AdenoCA(3),CNS-GBM(3),Head-SCC(1),Liver-HCC(1)
FUSION_5	'DNM3	14	SoftTissue-Liposarc(9),Breast-AdenoCA(2),Ovary-AdenoCA(1),Prost-AdenoCA(1),Uterus-AdenoCA(1)
FUSION_5	'ERC1	14	Breast-AdenoCA(4),Thy-AdenoCA(3),Panc-AdenoCA(2),Biliary-AdenoCA(1),ColoRect-AdenoCA(1),Eso-AdenoCA(1),Liver-HCC(1),Ovary-AdenoCA(1)
FUSION_5	'GAS7	14	Lymph-BNHL(3),Bone-Osteosarc(2),Breast-AdenoCA(2),Liver-HCC(2),Skin-Melanoma(2),Ovary-AdenoCA(1),Panc-AdenoCA(1),SoftTissue-Leiomyo(1)
FUSION_5	'GLIS3	14	Skin-Melanoma(7),SoftTissue-Liposarc(2),Head-SCC(1),Lung-SCC(1),Lymph-BNHL(1),Stomach-AdenoCA(1),Uterus-AdenoCA(1)
FUSION_5	'GPHN	14	Breast-AdenoCA(3),Eso-AdenoCA(2),Liver-HCC(2),Panc-AdenoCA(2),Prost-AdenoCA(2),ColoRect-AdenoCA(1),Head-SCC(1),Lung-AdenoCA(1)
FUSION_5	'HMCN1	14	Breast-AdenoCA(4),SoftTissue-Liposarc(4),Panc-AdenoCA(2),Skin-Melanoma(2),Ovary-AdenoCA(1),Prost-AdenoCA(1)
FUSION_5	'ITPR2	14	Liver-HCC(3),Ovary-AdenoCA(3),Panc-AdenoCA(2),Prost-AdenoCA(2),Biliary-AdenoCA(1),Bone-Osteosarc(1),Breast-AdenoCA(1),Skin-Melanoma(1)
FUSION_5	'KB-1047C11.2	14	Liver-HCC(3),Breast-AdenoCA(2),Lymph-BNHL(2),Panc-AdenoCA(2),Uterus-AdenoCA(2),Lung-SCC(1),Ovary-AdenoCA(1),SoftTissue-Liposarc(1)
FUSION_5	'KHDRBS2	14	Skin-Melanoma(6),Breast-AdenoCA(2),Lung-SCC(2),CNS-GBM(1),Kidney-RCC(1),Liver-HCC(1),Panc-AdenoCA(1)
FUSION_5	'KIAA1109	14	Prost-AdenoCA(9),Bone-Benign(1),Breast-AdenoCA(1),Liver-HCC(1),Skin-Melanoma(1),SoftTissue-Liposarc(1)
FUSION_5	'LPP	14	Breast-AdenoCA(4),Liver-HCC(2),Lung-SCC(2),Skin-Melanoma(2),Bone-Osteosarc(1),Eso-AdenoCA(1),Lung-AdenoCA(1),SoftTissue-Liposarc(1)
FUSION_5	'LRRIQ1	14	SoftTissue-Liposarc(9),Skin-Melanoma(4),Breast-AdenoCA(1)
FUSION_5	'NRG3	14	Breast-AdenoCA(6),Panc-AdenoCA(2),Uterus-AdenoCA(2),Bone-Epith(1),Eso-AdenoCA(1),Prost-AdenoCA(1),Skin-Melanoma(1)
FUSION_5	'NUP107	14	SoftTissue-Liposarc(9),Bone-Osteosarc(2),CNS-GBM(2),Breast-AdenoCA(1)
FUSION_5	'OARD1	14	Prost-AdenoCA(10),Breast-AdenoCA(1),Head-SCC(1),Lymph-BNHL(1),Uterus-AdenoCA(1)
FUSION_5	'PARD3B	14	Breast-AdenoCA(5),Panc-AdenoCA(3),Liver-HCC(2),Prost-AdenoCA(2),Eso-AdenoCA(1),Stomach-AdenoCA(1)
FUSION_5	'PHF21A	14	Prost-AdenoCA(4),Uterus-AdenoCA(3),Eso-AdenoCA(2),ColoRect-AdenoCA(1),Ovary-AdenoCA(1),Panc-Endocrine(1),Skin-Melanoma(1),Stomach-AdenoCA(1)
FUSION_5	'PSD3	14	Prost-AdenoCA(8),Panc-AdenoCA(2),Breast-AdenoCA(1),Breast-LobularCA(1),Head-SCC(1),Panc-Endocrine(1)
FUSION_5	'RAD51B	14	Ovary-AdenoCA(3),Breast-AdenoCA(2),Panc-AdenoCA(2),Biliary-AdenoCA(1),Bone-Osteosarc(1),Eso-AdenoCA(1),Head-SCC(1),Liver-HCC(1),Lymph-CLL(1),Prost-AdenoCA(1)
FUSION_5	'RB1	14	Breast-AdenoCA(7),Ovary-AdenoCA(3),Biliary-AdenoCA(2),Bone-Osteosarc(1),Lymph-CLL(1)
FUSION_5	'RBPJ	14	Prost-AdenoCA(11),Ovary-AdenoCA(2),Liver-HCC(1)
FUSION_5	'ROS1	14	Prost-AdenoCA(10),Bone-Osteosarc(2),Panc-AdenoCA(2)
FUSION_5	'RP11-150C16.1	14	CNS-GBM(8),SoftTissue-Liposarc(5),Skin-Melanoma(1)
FUSION_5	'RP11-325B23.2	14	Prost-AdenoCA(10),Breast-AdenoCA(1),ColoRect-AdenoCA(1),Ovary-AdenoCA(1),Panc-AdenoCA(1)
FUSION_5	'RP11-444D3.1	14	Stomach-AdenoCA(3),Liver-HCC(2),Panc-AdenoCA(2),Breast-AdenoCA(1),Eso-AdenoCA(1),Lung-SCC(1),Ovary-AdenoCA(1),Prost-AdenoCA(1),Skin-Melanoma(1),SoftTissue-Liposarc(1)
FUSION_5	'RYR1	14	CNS-GBM(4),Panc-AdenoCA(2),SoftTissue-Liposarc(2),Bladder-TCC(1),Breast-AdenoCA(1),Liver-HCC(1),Lymph-BNHL(1),Stomach-AdenoCA(1),Uterus-AdenoCA(1)
FUSION_5	'SHISA6	14	Liver-HCC(4),Biliary-AdenoCA(2),Breast-AdenoCA(2),Bone-Osteosarc(1),Ovary-AdenoCA(1),Panc-AdenoCA(1),Skin-Melanoma(1),SoftTissue-Liposarc(1),Stomach-AdenoCA(1)
FUSION_5	'SLC26A7	14	Prost-AdenoCA(9),Eso-AdenoCA(2),Ovary-AdenoCA(1),SoftTissue-Leiomyo(1),Stomach-AdenoCA(1)
FUSION_5	'SOX9-AS1	14	Skin-Melanoma(4),Panc-AdenoCA(3),Breast-AdenoCA(2),Eso-AdenoCA(2),Ovary-AdenoCA(1),SoftTissue-Liposarc(1),Uterus-AdenoCA(1)
FUSION_5	'ST8SIA1	14	Panc-AdenoCA(4),Ovary-AdenoCA(2),Biliary-AdenoCA(1),Bladder-TCC(1),CNS-Medullo(1),Prost-AdenoCA(1),SoftTissue-Leiomyo(1),SoftTissue-Liposarc(1),Stomach-AdenoCA(1),Uterus-AdenoCA(1)
FUSION_5	'STK3	14	Eso-AdenoCA(3),Breast-AdenoCA(2),Stomach-AdenoCA(2),Biliary-AdenoCA(1),Bladder-TCC(1),Liver-HCC(1),Ovary-AdenoCA(1),Panc-AdenoCA(1),Skin-Melanoma(1),Uterus-AdenoCA(1)
FUSION_5	'SUMF1	14	Biliary-AdenoCA(4),Eso-AdenoCA(2),Skin-Melanoma(2),Stomach-AdenoCA(2),Breast-AdenoCA(1),Liver-HCC(1),Panc-AdenoCA(1),Panc-Endocrine(1)
FUSION_5	'TBC1D22A	14	SoftTissue-Liposarc(5),Ovary-AdenoCA(2),Skin-Melanoma(2),Biliary-AdenoCA(1),Bone-Osteosarc(1),Breast-AdenoCA(1),Liver-HCC(1),Uterus-AdenoCA(1)
FUSION_5	'TRAPPC9	14	Breast-AdenoCA(4),Bone-Osteosarc(2),Ovary-AdenoCA(2),Skin-Melanoma(2),Biliary-AdenoCA(1),Bladder-TCC(1),Eso-AdenoCA(1),Uterus-AdenoCA(1)
FUSION_5	'WDR70	14	Skin-Melanoma(6),Breast-AdenoCA(3),Bone-Osteosarc(1),Breast-LobularCA(1),Ovary-AdenoCA(1),SoftTissue-Liposarc(1),Stomach-AdenoCA(1)
FUSION_5	'ZMAT4	14	Breast-AdenoCA(6),Panc-AdenoCA(3),Stomach-AdenoCA(2),ColoRect-AdenoCA(1),Prost-AdenoCA(1),SoftTissue-Liposarc(1)
FUSION_3	'AC079610.1	14	Ovary-AdenoCA(3),Uterus-AdenoCA(3),Bladder-TCC(2),Panc-AdenoCA(2),Breast-AdenoCA(1),Lung-AdenoCA(1),Panc-Endocrine(1),Prost-AdenoCA(1)
FUSION_3	'BCAR4	14	Skin-Melanoma(3),Eso-AdenoCA(2),Ovary-AdenoCA(2),Stomach-AdenoCA(2),Bone-Osteosarc(1),Breast-AdenoCA(1),Cervix-SCC(1),Panc-AdenoCA(1),Uterus-AdenoCA(1)
FUSION_3	'BTBD11	14	SoftTissue-Liposarc(6),Skin-Melanoma(4),Breast-AdenoCA(2),Panc-AdenoCA(1),SoftTissue-Leiomyo(1)
FUSION_3	'C10orf11	14	Eso-AdenoCA(3),Breast-AdenoCA(2),Panc-AdenoCA(2),Stomach-AdenoCA(2),Ovary-AdenoCA(1),Panc-Endocrine(1),Prost-AdenoCA(1),Skin-Melanoma(1),SoftTissue-Leiomyo(1)
FUSION_3	'CEP112	14	Panc-AdenoCA(5),Breast-AdenoCA(4),Bone-Osteosarc(1),Liver-HCC(1),Lung-SCC(1),Skin-Melanoma(1),SoftTissue-Liposarc(1)
FUSION_3	'COL14A1	14	Breast-AdenoCA(4),Ovary-AdenoCA(2),Eso-AdenoCA(1),Head-SCC(1),Liver-HCC(1),Lung-AdenoCA(1),Panc-AdenoCA(1),Skin-Melanoma(1),SoftTissue-Liposarc(1),Stomach-AdenoCA(1)
FUSION_3	'CTNNA2	14	Prost-AdenoCA(10),Breast-LobularCA(1),Liver-HCC(1),Ovary-AdenoCA(1),Skin-Melanoma(1)
FUSION_3	'DPP6	14	Stomach-AdenoCA(4),Breast-AdenoCA(3),Liver-HCC(3),Bone-Osteosarc(2),SoftTissue-Leiomyo(1),SoftTissue-Liposarc(1)
FUSION_3	'EPS15L1	14	Stomach-AdenoCA(6),Bone-Osteosarc(4),Liver-HCC(2),Ovary-AdenoCA(1),SoftTissue-Liposarc(1)
FUSION_3	'FAM168A	14	Skin-Melanoma(7),Breast-AdenoCA(2),Bone-Osteosarc(1),Breast-LobularCA(1),CNS-GBM(1),Eso-AdenoCA(1),Uterus-AdenoCA(1)
FUSION_3	'FGF12	14	SoftTissue-Liposarc(5),Breast-AdenoCA(2),Panc-AdenoCA(2),Prost-AdenoCA(2),Liver-HCC(1),Ovary-AdenoCA(1),Skin-Melanoma(1)
FUSION_3	'FRMD4B	14	Prost-AdenoCA(5),Uterus-AdenoCA(3),Stomach-AdenoCA(2),Breast-AdenoCA(1),Eso-AdenoCA(1),Liver-HCC(1),Panc-AdenoCA(1)
FUSION_3	'GREB1L	14	Stomach-AdenoCA(4),Eso-AdenoCA(3),Panc-AdenoCA(3),Liver-HCC(2),Bone-Osteosarc(1),Ovary-AdenoCA(1)
FUSION_3	'GRID2	14	Eso-AdenoCA(3),Liver-HCC(3),Prost-AdenoCA(3),SoftTissue-Liposarc(2),Lung-SCC(1),Ovary-AdenoCA(1),Skin-Melanoma(1)
FUSION_3	'HPSE2	14	Stomach-AdenoCA(5),Prost-AdenoCA(4),Breast-AdenoCA(2),Skin-Melanoma(2),Ovary-AdenoCA(1)
FUSION_3	'KANK1	14	Skin-Melanoma(3),Biliary-AdenoCA(2),Breast-AdenoCA(2),Lymph-BNHL(2),Prost-AdenoCA(2),Bone-Osteosarc(1),ColoRect-AdenoCA(1),SoftTissue-Liposarc(1)
FUSION_3	'KCNAB1	14	Prost-AdenoCA(8),Breast-AdenoCA(2),Liver-HCC(1),Lung-SCC(1),Ovary-AdenoCA(1),Skin-Melanoma(1)
FUSION_3	'KCNMB2	14	Prost-AdenoCA(4),Breast-AdenoCA(3),Ovary-AdenoCA(3),Eso-AdenoCA(2),Liver-HCC(1),Panc-AdenoCA(1)
FUSION_3	'KCNMB4	14	SoftTissue-Liposarc(7),Skin-Melanoma(4),Bone-Epith(1),Bone-Osteosarc(1),Panc-AdenoCA(1)
FUSION_3	'LEKR1	14	Prost-AdenoCA(11),Breast-AdenoCA(1),Skin-Melanoma(1),SoftTissue-Leiomyo(1)
FUSION_3	'LHFPL3	14	Ovary-AdenoCA(4),Breast-AdenoCA(3),Bone-Osteosarc(1),Eso-AdenoCA(1),Panc-AdenoCA(1),Prost-AdenoCA(1),Skin-Melanoma(1),Stomach-AdenoCA(1),Uterus-AdenoCA(1)
FUSION_3	'LRRC4C	14	Stomach-AdenoCA(4),Bone-Osteosarc(2),Breast-AdenoCA(2),Panc-AdenoCA(2),Prost-AdenoCA(2),Eso-AdenoCA(1),Lung-AdenoCA(1)
FUSION_3	'LRRTM4	14	Eso-AdenoCA(5),Lung-SCC(2),Skin-Melanoma(2),Breast-AdenoCA(1),Head-SCC(1),Ovary-AdenoCA(1),Prost-AdenoCA(1),Stomach-AdenoCA(1)
FUSION_3	'MAGI2	14	Eso-AdenoCA(2),Ovary-AdenoCA(2),Panc-AdenoCA(2),Bone-Osteosarc(1),Breast-AdenoCA(1),Cervix-SCC(1),Liver-HCC(1),Lung-SCC(1),Skin-Melanoma(1),SoftTissue-Liposarc(1),Stomach-AdenoCA(1)
FUSION_3	'MAP2	14	Prost-AdenoCA(10),Kidney-RCC(3),SoftTissue-Leiomyo(1)
FUSION_3	'MAPK8IP3	14	Prost-AdenoCA(7),Lung-SCC(2),Bone-Osteosarc(1),Breast-AdenoCA(1),CNS-GBM(1),Ovary-AdenoCA(1),Uterus-AdenoCA(1)
FUSION_3	'MSRA	14	Eso-AdenoCA(5),Stomach-AdenoCA(2),Breast-AdenoCA(1),CNS-Medullo(1),ColoRect-AdenoCA(1),Liver-HCC(1),Ovary-AdenoCA(1),Panc-AdenoCA(1),SoftTissue-Liposarc(1)
FUSION_3	'NAV3	14	SoftTissue-Liposarc(10),Biliary-AdenoCA(1),Breast-AdenoCA(1),Lung-AdenoCA(1),Skin-Melanoma(1)
FUSION_3	'NSMCE2	14	Liver-HCC(5),Biliary-AdenoCA(3),Panc-AdenoCA(2),Stomach-AdenoCA(2),Breast-AdenoCA(1),Lung-AdenoCA(1)
FUSION_3	'PDZD2	14	Skin-Melanoma(4),SoftTissue-Liposarc(3),Breast-AdenoCA(2),Prost-AdenoCA(2),Bone-Osteosarc(1),CNS-Medullo(1),Ovary-AdenoCA(1)
FUSION_3	'PLCB4	14	Breast-AdenoCA(3),CNS-GBM(2),Ovary-AdenoCA(2),Bladder-TCC(1),Breast-LobularCA(1),Liver-HCC(1),Lung-AdenoCA(1),Panc-AdenoCA(1),Prost-AdenoCA(1),Skin-Melanoma(1)
FUSION_3	'PTPRG	14	Prost-AdenoCA(11),Kidney-RCC(1),Skin-Melanoma(1),SoftTissue-Liposarc(1)
FUSION_3	'PTPRM	14	Breast-AdenoCA(4),Ovary-AdenoCA(3),Panc-AdenoCA(3),Stomach-AdenoCA(2),Skin-Melanoma(1),SoftTissue-Liposarc(1)
FUSION_3	'PVT1	14	CNS-Medullo(3),Breast-AdenoCA(2),Ovary-AdenoCA(2),Stomach-AdenoCA(2),Biliary-AdenoCA(1),Liver-HCC(1),Lymph-BNHL(1),Panc-AdenoCA(1),SoftTissue-Liposarc(1)
FUSION_3	'RFX2	14	Prost-AdenoCA(8),Lymph-BNHL(2),Eso-AdenoCA(1),Head-SCC(1),Liver-HCC(1),SoftTissue-Liposarc(1)
FUSION_3	'RP11-267C16.1	14	Panc-AdenoCA(11),Breast-AdenoCA(2),SoftTissue-Liposarc(1)
FUSION_3	'RP11-317N12.1	14	Liver-HCC(3),Ovary-AdenoCA(3),Breast-LobularCA(2),Biliary-AdenoCA(1),Breast-AdenoCA(1),Eso-AdenoCA(1),Prost-AdenoCA(1),Stomach-AdenoCA(1),Uterus-AdenoCA(1)
FUSION_3	'RP11-37B2.1	14	Prost-AdenoCA(9),Breast-AdenoCA(2),Liver-HCC(1),Skin-Melanoma(1),Uterus-AdenoCA(1)
FUSION_3	'RP11-541P9.3	14	Prost-AdenoCA(11),Eso-AdenoCA(1),Ovary-AdenoCA(1),Stomach-AdenoCA(1)
FUSION_3	'RP11-702H23.4	14	Breast-AdenoCA(4),Skin-Melanoma(3),Eso-AdenoCA(2),Stomach-AdenoCA(2),Uterus-AdenoCA(2),Ovary-AdenoCA(1)
FUSION_3	'RP11-962G15.1	14	Skin-Melanoma(3),Uterus-AdenoCA(3),Breast-AdenoCA(2),Ovary-AdenoCA(2),Panc-AdenoCA(2),Bladder-TCC(1),Lung-SCC(1)
FUSION_3	'RPRD2	14	Uterus-AdenoCA(5),Eso-AdenoCA(2),SoftTissue-Liposarc(2),Bone-Osteosarc(1),Breast-AdenoCA(1),Lung-SCC(1),Panc-AdenoCA(1),Skin-Melanoma(1)
FUSION_3	'SAE1	14	Prost-AdenoCA(5),Breast-AdenoCA(2),Ovary-AdenoCA(2),Stomach-AdenoCA(2),Liver-HCC(1),SoftTissue-Liposarc(1),Uterus-AdenoCA(1)
FUSION_3	'SHISA6	14	Liver-HCC(3),Skin-Melanoma(3),Stomach-AdenoCA(2),Breast-AdenoCA(1),Eso-AdenoCA(1),Lymph-BNHL(1),Ovary-AdenoCA(1),Prost-AdenoCA(1),SoftTissue-Liposarc(1)
FUSION_3	'SOX2-OT	14	Eso-AdenoCA(3),Lung-SCC(3),Ovary-AdenoCA(2),Bone-Osteosarc(1),CNS-GBM(1),Liver-HCC(1),Panc-AdenoCA(1),Panc-Endocrine(1),Uterus-AdenoCA(1)
FUSION_3	'SPECC1	14	Skin-Melanoma(5),Breast-AdenoCA(4),Lung-AdenoCA(2),SoftTissue-Liposarc(2),Eso-AdenoCA(1)
FUSION_3	'STX8	14	Prost-AdenoCA(7),Bone-Osteosarc(3),Breast-AdenoCA(1),CNS-GBM(1),Ovary-AdenoCA(1),Panc-AdenoCA(1)
FUSION_3	'TENM2	14	SoftTissue-Liposarc(4),Ovary-AdenoCA(3),Head-SCC(2),Bone-Osteosarc(1),Kidney-RCC(1),Panc-AdenoCA(1),Prost-AdenoCA(1),Skin-Melanoma(1)
FUSION_3	'TMEM131	14	Prost-AdenoCA(10),Bone-Osteosarc(2),Breast-AdenoCA(1),Lung-SCC(1)
FUSION_3	'TMEM132B	14	Bone-Osteosarc(6),Skin-Melanoma(3),SoftTissue-Liposarc(3),Breast-AdenoCA(1),Eso-AdenoCA(1)
FUSION_3	'TRPC6	14	Lung-SCC(3),Skin-Melanoma(3),Breast-AdenoCA(2),Bone-Osteosarc(1),Head-SCC(1),Lymph-CLL(1),Prost-AdenoCA(1),SoftTissue-Liposarc(1),Stomach-AdenoCA(1)
FUSION_3	'TRPM3	14	Breast-AdenoCA(6),Ovary-AdenoCA(3),SoftTissue-Liposarc(2),Eso-AdenoCA(1),Liver-HCC(1),Prost-AdenoCA(1)
FUSION_3	'TSFM	14	SoftTissue-Liposarc(7),CNS-GBM(3),Bone-Osteosarc(1),Breast-AdenoCA(1),ColoRect-AdenoCA(1),Panc-AdenoCA(1)
FUSION_3	'ZBTB20	14	Breast-AdenoCA(5),Ovary-AdenoCA(3),Prost-AdenoCA(3),Panc-AdenoCA(2),Bone-Osteosarc(1)
FUSION_3	'ZFPM2	14	Prost-AdenoCA(4),Lung-AdenoCA(2),Biliary-AdenoCA(1),Breast-AdenoCA(1),CNS-Medullo(1),Liver-HCC(1),Ovary-AdenoCA(1),Panc-AdenoCA(1),Skin-Melanoma(1),Stomach-AdenoCA(1)
FUSION_3	'ZNF285B	14	Prost-AdenoCA(12),Breast-AdenoCA(2)
DISRUPTION	'ABTB2	13	Breast-AdenoCA(5),Ovary-AdenoCA(2),Bone-Osteosarc(1),Liver-HCC(1),Lung-SCC(1),Lymph-BNHL(1),Panc-AdenoCA(1),Prost-AdenoCA(1)
DISRUPTION	'AC004538.3	13	Panc-AdenoCA(2),SoftTissue-Liposarc(2),Breast-AdenoCA(1),ColoRect-AdenoCA(1),Eso-AdenoCA(1),Liver-HCC(1),Lymph-BNHL(1),Ovary-AdenoCA(1),Prost-AdenoCA(1),Skin-Melanoma(1),Uterus-AdenoCA(1)
DISRUPTION	'ADAM22	13	Breast-AdenoCA(3),Eso-AdenoCA(3),Skin-Melanoma(2),Kidney-RCC(1),Liver-HCC(1),Lung-SCC(1),Prost-AdenoCA(1),Stomach-AdenoCA(1)
DISRUPTION	'ALCAM	13	Breast-AdenoCA(3),Lung-SCC(3),Liver-HCC(2),Ovary-AdenoCA(2),Prost-AdenoCA(2),Panc-AdenoCA(1)
DISRUPTION	'ALK	13	Eso-AdenoCA(3),Breast-AdenoCA(2),Ovary-AdenoCA(2),Prost-AdenoCA(2),Head-SCC(1),Lung-SCC(1),Stomach-AdenoCA(1),Thy-AdenoCA(1)
DISRUPTION	'ANAPC10	13	Breast-AdenoCA(5),Eso-AdenoCA(2),CNS-Medullo(1),Cervix-SCC(1),Head-SCC(1),Lung-AdenoCA(1),Lung-SCC(1),Ovary-AdenoCA(1)
DISRUPTION	'ARHGAP32	13	Eso-AdenoCA(2),Ovary-AdenoCA(2),Panc-AdenoCA(2),Bone-Osteosarc(1),Breast-AdenoCA(1),Liver-HCC(1),Lung-AdenoCA(1),Lung-SCC(1),Skin-Melanoma(1),Stomach-AdenoCA(1)
DISRUPTION	'ARID5B	13	Prost-AdenoCA(4),Breast-AdenoCA(3),Lymph-BNHL(2),Bladder-TCC(1),Panc-AdenoCA(1),Skin-Melanoma(1),Uterus-AdenoCA(1)
DISRUPTION	'ASPH	13	Ovary-AdenoCA(5),Breast-AdenoCA(2),Liver-HCC(2),Eso-AdenoCA(1),Head-SCC(1),Lung-SCC(1),Prost-AdenoCA(1)
DISRUPTION	'ATP8A1	13	Liver-HCC(3),Prost-AdenoCA(3),Breast-AdenoCA(2),Ovary-AdenoCA(2),Bone-Osteosarc(1),Panc-AdenoCA(1),Skin-Melanoma(1)
DISRUPTION	'BAZ2B	13	Prost-AdenoCA(4),Ovary-AdenoCA(2),Panc-AdenoCA(2),Eso-AdenoCA(1),Kidney-RCC(1),Liver-HCC(1),Lung-SCC(1),Uterus-AdenoCA(1)
DISRUPTION	'BCAR3	13	Ovary-AdenoCA(3),Breast-AdenoCA(2),Liver-HCC(2),Prost-AdenoCA(2),Bone-Osteosarc(1),ColoRect-AdenoCA(1),Lung-AdenoCA(1),Skin-Melanoma(1)
DISRUPTION	'BICC1	13	Prost-AdenoCA(3),Head-SCC(2),Liver-HCC(2),Bone-Osteosarc(1),Breast-AdenoCA(1),CNS-GBM(1),Lung-SCC(1),Panc-AdenoCA(1),SoftTissue-Liposarc(1)
DISRUPTION	'BIRC6	13	Prost-AdenoCA(3),Breast-AdenoCA(2),Panc-AdenoCA(2),Bladder-TCC(1),Liver-HCC(1),Lung-SCC(1),Ovary-AdenoCA(1),SoftTissue-Liposarc(1),Stomach-AdenoCA(1)
DISRUPTION	'C12orf75	13	Prost-AdenoCA(3),SoftTissue-Liposarc(3),Breast-AdenoCA(2),Eso-AdenoCA(2),CNS-GBM(1),Skin-Melanoma(1),Stomach-AdenoCA(1)
DISRUPTION	'C20orf26	13	Ovary-AdenoCA(3),Breast-AdenoCA(2),Panc-AdenoCA(2),Bone-Osteosarc(1),Eso-AdenoCA(1),Head-SCC(1),Lymph-BNHL(1),Prost-AdenoCA(1),SoftTissue-Liposarc(1)
DISRUPTION	'CAGE1	13	Prost-AdenoCA(6),Ovary-AdenoCA(3),Skin-Melanoma(2),Bladder-TCC(1),Breast-AdenoCA(1)
DISRUPTION	'CASC3	13	Prost-AdenoCA(4),Breast-AdenoCA(2),Eso-AdenoCA(2),Stomach-AdenoCA(2),Ovary-AdenoCA(1),SoftTissue-Leiomyo(1),SoftTissue-Liposarc(1)
DISRUPTION	'CDC42BPA	13	Breast-AdenoCA(3),Stomach-AdenoCA(3),SoftTissue-Leiomyo(2),CNS-GBM(1),Ovary-AdenoCA(1),Panc-AdenoCA(1),Skin-Melanoma(1),SoftTissue-Liposarc(1)
DISRUPTION	'CDH6	13	Skin-Melanoma(3),Bone-Osteosarc(2),Lung-AdenoCA(2),SoftTissue-Liposarc(2),Breast-AdenoCA(1),Eso-AdenoCA(1),Ovary-AdenoCA(1),Prost-AdenoCA(1)
DISRUPTION	'CDH8	13	Bone-Osteosarc(2),Panc-AdenoCA(2),Bladder-TCC(1),Lymph-BNHL(1),Ovary-AdenoCA(1),Panc-Endocrine(1),Prost-AdenoCA(1),Skin-Melanoma(1),SoftTissue-Liposarc(1),Stomach-AdenoCA(1),Uterus-AdenoCA(1)
DISRUPTION	'CFTR	13	Eso-AdenoCA(3),Liver-HCC(3),Breast-AdenoCA(1),CNS-GBM(1),ColoRect-AdenoCA(1),Kidney-RCC(1),Lung-AdenoCA(1),Panc-AdenoCA(1),Skin-Melanoma(1)
DISRUPTION	'CGGBP1	13	Prost-AdenoCA(4),Breast-AdenoCA(2),Bone-Osteosarc(1),CNS-Medullo(1),Kidney-ChRCC(1),Liver-HCC(1),Lung-SCC(1),Lymph-BNHL(1),Stomach-AdenoCA(1)
DISRUPTION	'CHST8	13	Ovary-AdenoCA(3),Biliary-AdenoCA(2),Panc-AdenoCA(2),Liver-HCC(1),Lung-AdenoCA(1),Lung-SCC(1),Skin-Melanoma(1),SoftTissue-Liposarc(1),Stomach-AdenoCA(1)
DISRUPTION	'CNKSR3	13	Liver-HCC(4),Breast-AdenoCA(3),Stomach-AdenoCA(2),Bladder-TCC(1),Panc-AdenoCA(1),Skin-Melanoma(1),SoftTissue-Leiomyo(1)
DISRUPTION	'CNTN3	13	Lung-AdenoCA(3),Liver-HCC(2),Ovary-AdenoCA(2),Panc-AdenoCA(2),Stomach-AdenoCA(2),Breast-AdenoCA(1),Lymph-BNHL(1)
DISRUPTION	'COL9A1	13	Prost-AdenoCA(5),Liver-HCC(3),Bone-Benign(1),Panc-AdenoCA(1),Skin-Melanoma(1),Stomach-AdenoCA(1),Uterus-AdenoCA(1)
DISRUPTION	'CORIN	13	Breast-AdenoCA(2),Ovary-AdenoCA(2),Bone-Osteosarc(1),CNS-GBM(1),Cervix-SCC(1),Lung-SCC(1),Panc-AdenoCA(1),Prost-AdenoCA(1),SoftTissue-Leiomyo(1),SoftTissue-Liposarc(1),Stomach-AdenoCA(1)
DISRUPTION	'CPT1A	13	Skin-Melanoma(4),Breast-AdenoCA(2),Uterus-AdenoCA(2),Bladder-TCC(1),Breast-LobularCA(1),Liver-HCC(1),Ovary-AdenoCA(1),Panc-AdenoCA(1)
DISRUPTION	'CRTAC1	13	Prost-AdenoCA(6),Uterus-AdenoCA(2),Bone-Osteosarc(1),Breast-AdenoCA(1),ColoRect-AdenoCA(1),Lung-SCC(1),Skin-Melanoma(1)
DISRUPTION	'CTD-2021H9.2	13	SoftTissue-Liposarc(5),Bone-Osteosarc(3),CNS-Medullo(1),Liver-HCC(1),Panc-AdenoCA(1),Skin-Melanoma(1),Stomach-AdenoCA(1)
DISRUPTION	'CTD-2378E21.1	13	Prost-AdenoCA(6),Breast-AdenoCA(1),Head-SCC(1),Lung-AdenoCA(1),Ovary-AdenoCA(1),Panc-AdenoCA(1),SoftTissue-Liposarc(1),Uterus-AdenoCA(1)
DISRUPTION	'CTD-2544M6.1	13	Breast-AdenoCA(4),Panc-AdenoCA(3),Bone-Osteosarc(2),Ovary-AdenoCA(2),ColoRect-AdenoCA(1),Kidney-ChRCC(1)
DISRUPTION	'CWC27	13	Prost-AdenoCA(3),Ovary-AdenoCA(2),Skin-Melanoma(2),Bone-Epith(1),Cervix-SCC(1),Eso-AdenoCA(1),Panc-AdenoCA(1),SoftTissue-Liposarc(1),Uterus-AdenoCA(1)
DISRUPTION	'DCHS2	13	Liver-HCC(5),Ovary-AdenoCA(2),Panc-AdenoCA(2),Breast-AdenoCA(1),Kidney-ChRCC(1),Lung-SCC(1),Prost-AdenoCA(1)
DISRUPTION	'DGKH	13	Ovary-AdenoCA(3),Panc-AdenoCA(2),Stomach-AdenoCA(2),Breast-AdenoCA(1),CNS-Oligo(1),Eso-AdenoCA(1),Liver-HCC(1),Lymph-BNHL(1),Prost-AdenoCA(1)
DISRUPTION	'DNAH11	13	Breast-AdenoCA(2),Panc-AdenoCA(2),Prost-AdenoCA(2),Eso-AdenoCA(1),Head-SCC(1),Liver-HCC(1),Lung-AdenoCA(1),Ovary-AdenoCA(1),Skin-Melanoma(1),SoftTissue-Liposarc(1)
DISRUPTION	'DNAJC5B	13	Prost-AdenoCA(8),Breast-AdenoCA(2),Liver-HCC(2),SoftTissue-Liposarc(1)
DISRUPTION	'DNM1L	13	Prost-AdenoCA(10),Lymph-BNHL(1),Panc-AdenoCA(1),Uterus-AdenoCA(1)
DISRUPTION	'DOCK2	13	Skin-Melanoma(3),Breast-AdenoCA(2),Liver-HCC(2),Ovary-AdenoCA(2),SoftTissue-Liposarc(2),Panc-AdenoCA(1),Prost-AdenoCA(1)
DISRUPTION	'DOCK7	13	Breast-AdenoCA(3),Panc-AdenoCA(2),Stomach-AdenoCA(2),Breast-LobularCA(1),Eso-AdenoCA(1),Liver-HCC(1),Lung-AdenoCA(1),Prost-AdenoCA(1),Uterus-AdenoCA(1)
DISRUPTION	'EBF2	13	Breast-AdenoCA(3),Ovary-AdenoCA(3),Prost-AdenoCA(2),Eso-AdenoCA(1),Liver-HCC(1),Lymph-BNHL(1),Panc-AdenoCA(1),SoftTissue-Liposarc(1)
DISRUPTION	'EDA	13	Prost-AdenoCA(7),Breast-AdenoCA(2),Eso-AdenoCA(1),Ovary-AdenoCA(1),Panc-AdenoCA(1),SoftTissue-Liposarc(1)
DISRUPTION	'EDEM2	13	Prost-AdenoCA(4),Breast-AdenoCA(3),Ovary-AdenoCA(2),Eso-AdenoCA(1),Liver-HCC(1),Stomach-AdenoCA(1),Uterus-AdenoCA(1)
DISRUPTION	'ENAH	13	Breast-AdenoCA(4),Stomach-AdenoCA(3),Bone-Osteosarc(1),Eso-AdenoCA(1),Liver-HCC(1),Ovary-AdenoCA(1),Prost-AdenoCA(1),Uterus-AdenoCA(1)
DISRUPTION	'FAM19A5	13	Breast-AdenoCA(6),Eso-AdenoCA(2),Biliary-AdenoCA(1),CNS-Medullo(1),Panc-AdenoCA(1),Skin-Melanoma(1),SoftTissue-Liposarc(1)
DISRUPTION	'FARS2	13	Panc-AdenoCA(3),Skin-Melanoma(3),Breast-AdenoCA(2),Biliary-AdenoCA(1),Eso-AdenoCA(1),Liver-HCC(1),Ovary-AdenoCA(1),SoftTissue-Liposarc(1)
DISRUPTION	'FCRL5	13	Prost-AdenoCA(10),SoftTissue-Liposarc(2),Breast-AdenoCA(1)
DISRUPTION	'FGGY	13	Breast-AdenoCA(4),Panc-AdenoCA(2),Stomach-AdenoCA(2),Liver-HCC(1),Lung-SCC(1),Lymph-BNHL(1),SoftTissue-Liposarc(1),Uterus-AdenoCA(1)
DISRUPTION	'FNDC3A	13	Lymph-CLL(3),Liver-HCC(2),Biliary-AdenoCA(1),CNS-GBM(1),ColoRect-AdenoCA(1),Head-SCC(1),Prost-AdenoCA(1),Skin-Melanoma(1),Stomach-AdenoCA(1),Uterus-AdenoCA(1)
DISRUPTION	'FRAS1	13	Breast-AdenoCA(3),Eso-AdenoCA(2),Lymph-BNHL(2),Stomach-AdenoCA(2),Bone-Benign(1),Breast-LobularCA(1),Prost-AdenoCA(1),SoftTissue-Leiomyo(1)
DISRUPTION	'FRK	13	Prost-AdenoCA(9),Lung-AdenoCA(1),Panc-AdenoCA(1),Stomach-AdenoCA(1),Uterus-AdenoCA(1)
DISRUPTION	'FRYL	13	Bone-Osteosarc(2),Breast-AdenoCA(2),Eso-AdenoCA(2),Lung-SCC(2),Ovary-AdenoCA(2),Skin-Melanoma(2),Liver-HCC(1)
DISRUPTION	'GAB2	13	Breast-AdenoCA(4),Skin-Melanoma(4),Ovary-AdenoCA(2),Biliary-AdenoCA(1),Breast-LobularCA(1),Panc-AdenoCA(1)
DISRUPTION	'GLTSCR1L	13	Breast-AdenoCA(2),Eso-AdenoCA(2),Stomach-AdenoCA(2),Biliary-AdenoCA(1),Bone-Benign(1),Bone-Osteosarc(1),Liver-HCC(1),Ovary-AdenoCA(1),Panc-AdenoCA(1),Uterus-AdenoCA(1)
DISRUPTION	'GNG12	13	Skin-Melanoma(3),Breast-AdenoCA(2),Liver-HCC(2),Biliary-AdenoCA(1),Bladder-TCC(1),Head-SCC(1),Lung-SCC(1),Prost-AdenoCA(1),Uterus-AdenoCA(1)
DISRUPTION	'GRHL2	13	Breast-AdenoCA(3),Prost-AdenoCA(3),Ovary-AdenoCA(2),Panc-AdenoCA(2),Eso-AdenoCA(1),Kidney-ChRCC(1),SoftTissue-Liposarc(1)
DISRUPTION	'GRM3	13	Skin-Melanoma(3),Eso-AdenoCA(2),Liver-HCC(2),Breast-AdenoCA(1),CNS-Medullo(1),Kidney-RCC(1),Lung-AdenoCA(1),Lung-SCC(1),Stomach-AdenoCA(1)
DISRUPTION	'GSDMC	13	Liver-HCC(9),Biliary-AdenoCA(1),Bone-Osteosarc(1),Breast-AdenoCA(1),Panc-AdenoCA(1)
DISRUPTION	'GTDC1	13	Breast-AdenoCA(4),Prost-AdenoCA(4),Bladder-TCC(1),Eso-AdenoCA(1),Lymph-BNHL(1),Panc-AdenoCA(1),Skin-Melanoma(1)
DISRUPTION	'GTF2IRD1	13	Breast-AdenoCA(4),Liver-HCC(2),Ovary-AdenoCA(2),Stomach-AdenoCA(2),Lung-AdenoCA(1),Prost-AdenoCA(1),Uterus-AdenoCA(1)
DISRUPTION	'GUCY2GP	13	Prost-AdenoCA(5),Liver-HCC(3),Bone-Osteosarc(1),Breast-AdenoCA(1),Ovary-AdenoCA(1),Panc-AdenoCA(1),Uterus-AdenoCA(1)
DISRUPTION	'HDAC4	13	Skin-Melanoma(4),Stomach-AdenoCA(3),Bone-Osteosarc(1),Head-SCC(1),Liver-HCC(1),Panc-AdenoCA(1),Panc-Endocrine(1),Uterus-AdenoCA(1)
DISRUPTION	'HOOK2	13	Ovary-AdenoCA(4),Breast-AdenoCA(3),Bone-Osteosarc(2),ColoRect-AdenoCA(1),Liver-HCC(1),Skin-Melanoma(1),SoftTissue-Leiomyo(1)
DISRUPTION	'HS3ST5	13	Breast-AdenoCA(3),Lymph-BNHL(2),Ovary-AdenoCA(2),Bone-Osteosarc(1),Cervix-SCC(1),Liver-HCC(1),Prost-AdenoCA(1),Skin-Melanoma(1),Uterus-AdenoCA(1)
DISRUPTION	'IDO1	13	Prost-AdenoCA(7),Breast-AdenoCA(2),Lung-SCC(2),Liver-HCC(1),Panc-AdenoCA(1)
DISRUPTION	'IGF1R	13	Breast-AdenoCA(6),Skin-Melanoma(3),Bone-Osteosarc(2),ColoRect-AdenoCA(1),SoftTissue-Liposarc(1)
DISRUPTION	'KANK1	13	Breast-AdenoCA(4),Skin-Melanoma(3),Biliary-AdenoCA(1),Bone-Osteosarc(1),Eso-AdenoCA(1),Lymph-BNHL(1),Ovary-AdenoCA(1),SoftTissue-Liposarc(1)
DISRUPTION	'KCNAB1	13	Prost-AdenoCA(5),Breast-AdenoCA(3),Bone-Osteosarc(1),Liver-HCC(1),Lymph-BNHL(1),Skin-Melanoma(1),SoftTissue-Liposarc(1)
DISRUPTION	'KCNH5	13	Breast-AdenoCA(3),Panc-AdenoCA(3),Liver-HCC(2),Bone-Osteosarc(1),Lung-SCC(1),Prost-AdenoCA(1),Skin-Melanoma(1),SoftTissue-Liposarc(1)
DISRUPTION	'KDM4B	13	Breast-AdenoCA(3),Bone-Osteosarc(2),Eso-AdenoCA(2),CNS-GBM(1),Liver-HCC(1),Myeloid-MPN(1),Panc-AdenoCA(1),Prost-AdenoCA(1),SoftTissue-Liposarc(1)
DISRUPTION	'KLHL1	13	Breast-AdenoCA(3),Stomach-AdenoCA(3),SoftTissue-Liposarc(2),Ovary-AdenoCA(1),Panc-AdenoCA(1),Prost-AdenoCA(1),Skin-Melanoma(1),SoftTissue-Leiomyo(1)
DISRUPTION	'LETM1	13	Liver-HCC(3),Lung-SCC(2),Panc-AdenoCA(2),Bladder-TCC(1),Eso-AdenoCA(1),Ovary-AdenoCA(1),Skin-Melanoma(1),Stomach-AdenoCA(1),Uterus-AdenoCA(1)
DISRUPTION	'LINC00578	13	Ovary-AdenoCA(5),Breast-AdenoCA(4),CNS-Medullo(1),Lung-SCC(1),SoftTissue-Leiomyo(1),Uterus-AdenoCA(1)
DISRUPTION	'LINC01060	13	Ovary-AdenoCA(2),Panc-AdenoCA(2),Skin-Melanoma(2),Breast-AdenoCA(1),CNS-GBM(1),Eso-AdenoCA(1),Head-SCC(1),Liver-HCC(1),Prost-AdenoCA(1),SoftTissue-Liposarc(1)
DISRUPTION	'LPA	13	Prost-AdenoCA(11),ColoRect-AdenoCA(1),Ovary-AdenoCA(1)
DISRUPTION	'LRGUK	13	SoftTissue-Liposarc(3),Eso-AdenoCA(2),Skin-Melanoma(2),Bone-Osteosarc(1),ColoRect-AdenoCA(1),Liver-HCC(1),Ovary-AdenoCA(1),Prost-AdenoCA(1),Uterus-AdenoCA(1)
DISRUPTION	'LRRC7	13	Liver-HCC(4),Breast-AdenoCA(3),Prost-AdenoCA(3),Ovary-AdenoCA(1),Skin-Melanoma(1),SoftTissue-Leiomyo(1)
DISRUPTION	'LYN	13	Breast-AdenoCA(3),Ovary-AdenoCA(2),Panc-AdenoCA(2),Biliary-AdenoCA(1),ColoRect-AdenoCA(1),Kidney-RCC(1),Liver-HCC(1),Lung-SCC(1),Skin-Melanoma(1)
DISRUPTION	'MAP4	13	Uterus-AdenoCA(3),Breast-AdenoCA(2),Ovary-AdenoCA(2),Liver-HCC(1),Lung-AdenoCA(1),Lymph-BNHL(1),Lymph-CLL(1),Skin-Melanoma(1),Stomach-AdenoCA(1)
DISRUPTION	'MBD5	13	Prost-AdenoCA(3),Breast-AdenoCA(2),Panc-AdenoCA(2),Stomach-AdenoCA(2),Ovary-AdenoCA(1),Skin-Melanoma(1),SoftTissue-Leiomyo(1),SoftTissue-Liposarc(1)
DISRUPTION	'MBNL1	13	Prost-AdenoCA(5),Breast-AdenoCA(1),Eso-AdenoCA(1),Liver-HCC(1),Lymph-CLL(1),Ovary-AdenoCA(1),Skin-Melanoma(1),SoftTissue-Leiomyo(1),SoftTissue-Liposarc(1)
DISRUPTION	'MICAL3	13	Breast-AdenoCA(3),Ovary-AdenoCA(3),Uterus-AdenoCA(2),CNS-GBM(1),Liver-HCC(1),Lung-SCC(1),Panc-AdenoCA(1),SoftTissue-Liposarc(1)
DISRUPTION	'MKL1	13	Prost-AdenoCA(4),Skin-Melanoma(3),Liver-HCC(1),Ovary-AdenoCA(1),Panc-Endocrine(1),SoftTissue-Liposarc(1),Stomach-AdenoCA(1),Uterus-AdenoCA(1)
DISRUPTION	'MLLT10	13	Breast-AdenoCA(5),Prost-AdenoCA(2),Eso-AdenoCA(1),Head-SCC(1),Ovary-AdenoCA(1),Panc-AdenoCA(1),Panc-Endocrine(1),Stomach-AdenoCA(1)
DISRUPTION	'MSRA	13	Eso-AdenoCA(4),Breast-AdenoCA(2),Panc-AdenoCA(2),Liver-HCC(1),Lymph-BNHL(1),Skin-Melanoma(1),SoftTissue-Liposarc(1),Stomach-AdenoCA(1)
DISRUPTION	'MTA3	13	Breast-AdenoCA(2),Eso-AdenoCA(2),Ovary-AdenoCA(2),Bone-Osteosarc(1),Head-SCC(1),Liver-HCC(1),Panc-AdenoCA(1),Panc-Endocrine(1),Skin-Melanoma(1),Stomach-AdenoCA(1)
DISRUPTION	'MUC16	13	Ovary-AdenoCA(6),Uterus-AdenoCA(2),Bone-Osteosarc(1),Lymph-BNHL(1),Panc-AdenoCA(1),SoftTissue-Liposarc(1),Stomach-AdenoCA(1)
DISRUPTION	'MYO10	13	Skin-Melanoma(3),Ovary-AdenoCA(2),Bone-Osteosarc(1),Liver-HCC(1),Lung-AdenoCA(1),Panc-AdenoCA(1),Prost-AdenoCA(1),SoftTissue-Liposarc(1),Stomach-AdenoCA(1),Uterus-AdenoCA(1)
DISRUPTION	'MYO7A	13	Skin-Melanoma(6),Breast-AdenoCA(3),Liver-HCC(2),Eso-AdenoCA(1),Ovary-AdenoCA(1)
DISRUPTION	'NFASC	13	Ovary-AdenoCA(2),Biliary-AdenoCA(1),Bone-Osteosarc(1),Breast-AdenoCA(1),CNS-GBM(1),Cervix-SCC(1),Lymph-CLL(1),Panc-AdenoCA(1),Prost-AdenoCA(1),Skin-Melanoma(1),SoftTissue-Liposarc(1),Uterus-AdenoCA(1)
DISRUPTION	'NR3C2	13	Prost-AdenoCA(6),Panc-AdenoCA(2),Breast-AdenoCA(1),Eso-AdenoCA(1),Lung-SCC(1),Ovary-AdenoCA(1),SoftTissue-Liposarc(1)
DISRUPTION	'NUP155	13	Ovary-AdenoCA(3),Liver-HCC(2),Skin-Melanoma(2),SoftTissue-Liposarc(2),Bone-Osteosarc(1),Breast-AdenoCA(1),Breast-LobularCA(1),Lung-SCC(1)
DISRUPTION	'NXPH1	13	Liver-HCC(4),Panc-AdenoCA(2),Stomach-AdenoCA(2),Breast-AdenoCA(1),ColoRect-AdenoCA(1),Prost-AdenoCA(1),Skin-Melanoma(1),SoftTissue-Liposarc(1)
DISRUPTION	'OLA1	13	Liver-HCC(3),Breast-AdenoCA(2),Eso-AdenoCA(2),Prost-AdenoCA(2),Biliary-AdenoCA(1),Head-SCC(1),SoftTissue-Leiomyo(1),Uterus-AdenoCA(1)
DISRUPTION	'OR9Q1	13	Breast-AdenoCA(3),Skin-Melanoma(2),Stomach-AdenoCA(2),Breast-LobularCA(1),Liver-HCC(1),Lung-SCC(1),Lymph-BNHL(1),Panc-AdenoCA(1),Prost-AdenoCA(1)
DISRUPTION	'PAQR8	13	Prost-AdenoCA(10),Panc-AdenoCA(2),Head-SCC(1)
DISRUPTION	'PC	13	Liver-HCC(4),Breast-AdenoCA(3),Panc-AdenoCA(2),Bladder-TCC(1),Head-SCC(1),Prost-AdenoCA(1),Uterus-AdenoCA(1)
DISRUPTION	'PDSS2	13	Bladder-TCC(2),Breast-AdenoCA(2),Eso-AdenoCA(2),Uterus-AdenoCA(2),CNS-GBM(1),ColoRect-AdenoCA(1),Liver-HCC(1),Ovary-AdenoCA(1),Panc-AdenoCA(1)
DISRUPTION	'PGAP3	13	Stomach-AdenoCA(4),Breast-AdenoCA(3),Eso-AdenoCA(3),Ovary-AdenoCA(2),Cervix-AdenoCA(1)
DISRUPTION	'PHLPP1	13	Lung-SCC(3),Breast-AdenoCA(2),Ovary-AdenoCA(2),Stomach-AdenoCA(2),Bone-Osteosarc(1),Eso-AdenoCA(1),Skin-Melanoma(1),Uterus-AdenoCA(1)
DISRUPTION	'PIK3C2B	13	CNS-GBM(3),Skin-Melanoma(3),Breast-AdenoCA(2),Eso-AdenoCA(1),Liver-HCC(1),Lung-AdenoCA(1),Lymph-BNHL(1),SoftTissue-Liposarc(1)
DISRUPTION	'PIK3C2G	13	Breast-AdenoCA(5),Prost-AdenoCA(3),Head-SCC(1),Liver-HCC(1),SoftTissue-Leiomyo(1),SoftTissue-Liposarc(1),Stomach-AdenoCA(1)
DISRUPTION	'PIP5K1B	13	Breast-AdenoCA(3),Eso-AdenoCA(3),Liver-HCC(2),SoftTissue-Liposarc(2),Head-SCC(1),Lymph-BNHL(1),Ovary-AdenoCA(1)
DISRUPTION	'PKIB	13	Bone-Osteosarc(3),Breast-AdenoCA(3),Prost-AdenoCA(2),Bone-Benign(1),Kidney-RCC(1),Lymph-BNHL(1),Ovary-AdenoCA(1),Uterus-AdenoCA(1)
DISRUPTION	'PLEKHA7	13	Breast-AdenoCA(5),Skin-Melanoma(3),Bone-Osteosarc(1),CNS-Medullo(1),Head-SCC(1),Lung-SCC(1),SoftTissue-Liposarc(1)
DISRUPTION	'PLXNA2	13	Breast-AdenoCA(6),Panc-AdenoCA(2),Biliary-AdenoCA(1),Bladder-TCC(1),Liver-HCC(1),Skin-Melanoma(1),Stomach-AdenoCA(1)
DISRUPTION	'PPHLN1	13	Breast-AdenoCA(3),SoftTissue-Liposarc(2),Stomach-AdenoCA(2),CNS-GBM(1),CNS-Oligo(1),Eso-AdenoCA(1),Liver-HCC(1),Panc-AdenoCA(1),Prost-AdenoCA(1)
DISRUPTION	'PPIP5K2	13	Prost-AdenoCA(10),Eso-AdenoCA(1),Lymph-BNHL(1),SoftTissue-Liposarc(1)
DISRUPTION	'PRKCE	13	Breast-AdenoCA(3),Ovary-AdenoCA(3),Panc-AdenoCA(3),Liver-HCC(1),Prost-AdenoCA(1),Skin-Melanoma(1),Thy-AdenoCA(1)
DISRUPTION	'PRLR	13	Prost-AdenoCA(3),Skin-Melanoma(2),SoftTissue-Liposarc(2),Biliary-AdenoCA(1),Kidney-ChRCC(1),Lung-AdenoCA(1),Lung-SCC(1),Ovary-AdenoCA(1),Stomach-AdenoCA(1)
DISRUPTION	'PTH2R	13	Breast-AdenoCA(6),ColoRect-AdenoCA(1),Eso-AdenoCA(1),Kidney-RCC(1),Liver-HCC(1),Panc-AdenoCA(1),Skin-Melanoma(1),SoftTissue-Leiomyo(1)
DISRUPTION	'QKI	13	Breast-AdenoCA(2),Liver-HCC(2),Ovary-AdenoCA(2),Prost-AdenoCA(2),Bladder-TCC(1),Bone-Osteosarc(1),Kidney-RCC(1),Lymph-BNHL(1),Skin-Melanoma(1)
DISRUPTION	'RAB31	13	Panc-AdenoCA(3),Bone-Osteosarc(2),Ovary-AdenoCA(2),Eso-AdenoCA(1),Head-SCC(1),Prost-AdenoCA(1),Skin-Melanoma(1),SoftTissue-Liposarc(1),Stomach-AdenoCA(1)
DISRUPTION	'RASAL2	13	Breast-AdenoCA(3),Bone-Osteosarc(2),Biliary-AdenoCA(1),CNS-Medullo(1),Eso-AdenoCA(1),Kidney-ChRCC(1),Liver-HCC(1),Ovary-AdenoCA(1),Skin-Melanoma(1),SoftTissue-Liposarc(1)
DISRUPTION	'RASSF3	13	SoftTissue-Liposarc(5),Breast-AdenoCA(2),Bone-Osteosarc(1),Eso-AdenoCA(1),Lung-AdenoCA(1),Ovary-AdenoCA(1),Panc-AdenoCA(1),Skin-Melanoma(1)
DISRUPTION	'RGS6	13	Breast-AdenoCA(2),Eso-AdenoCA(2),Panc-AdenoCA(2),Prost-AdenoCA(2),Head-SCC(1),Kidney-RCC(1),Lung-AdenoCA(1),Skin-Melanoma(1),SoftTissue-Liposarc(1)
DISRUPTION	'RNF144B	13	Ovary-AdenoCA(5),Breast-AdenoCA(2),Uterus-AdenoCA(2),Bone-Osteosarc(1),Eso-AdenoCA(1),Liver-HCC(1),Prost-AdenoCA(1)
DISRUPTION	'RNF214	13	Prost-AdenoCA(12),Biliary-AdenoCA(1)
DISRUPTION	'RP11-1101K5.1	13	Lung-SCC(2),Ovary-AdenoCA(2),Prost-AdenoCA(2),Skin-Melanoma(2),Bladder-TCC(1),Breast-AdenoCA(1),Liver-HCC(1),Lung-AdenoCA(1),SoftTissue-Liposarc(1)
DISRUPTION	'RP11-124N3.3	13	Lung-SCC(2),Panc-AdenoCA(2),Skin-Melanoma(2),SoftTissue-Liposarc(2),Bone-Osteosarc(1),Breast-AdenoCA(1),CNS-Medullo(1),Kidney-ChRCC(1),Liver-HCC(1)
DISRUPTION	'RP11-125B21.2	13	Panc-AdenoCA(3),Uterus-AdenoCA(3),Breast-AdenoCA(2),SoftTissue-Liposarc(2),Liver-HCC(1),Lymph-BNHL(1),Skin-Melanoma(1)
DISRUPTION	'RP11-13N12.1	13	Prost-AdenoCA(3),Eso-AdenoCA(2),Breast-AdenoCA(1),Liver-HCC(1),Lung-AdenoCA(1),Lymph-BNHL(1),Panc-Endocrine(1),Skin-Melanoma(1),SoftTissue-Liposarc(1),Stomach-AdenoCA(1)
DISRUPTION	'RP11-155G15.2	13	Prost-AdenoCA(5),Kidney-RCC(3),Breast-AdenoCA(1),Liver-HCC(1),Ovary-AdenoCA(1),Panc-AdenoCA(1),SoftTissue-Liposarc(1)
DISRUPTION	'RP11-161I6.2	13	Panc-AdenoCA(5),Bone-Osteosarc(2),Liver-HCC(2),Ovary-AdenoCA(2),Breast-AdenoCA(1),Head-SCC(1)
DISRUPTION	'RP11-219B17.1	13	Breast-AdenoCA(3),Liver-HCC(2),Bone-Osteosarc(1),Breast-LobularCA(1),Eso-AdenoCA(1),Kidney-ChRCC(1),Ovary-AdenoCA(1),Panc-AdenoCA(1),Prost-AdenoCA(1),Skin-Melanoma(1)
DISRUPTION	'RP11-267C16.1	13	Lung-SCC(3),Panc-AdenoCA(3),ColoRect-AdenoCA(1),Eso-AdenoCA(1),Liver-HCC(1),Ovary-AdenoCA(1),Skin-Melanoma(1),SoftTissue-Liposarc(1),Stomach-AdenoCA(1)
DISRUPTION	'RP11-344E13.3	13	Breast-AdenoCA(3),Prost-AdenoCA(3),Ovary-AdenoCA(2),Bone-Osteosarc(1),Lymph-BNHL(1),Panc-AdenoCA(1),Skin-Melanoma(1),SoftTissue-Leiomyo(1)
DISRUPTION	'RP11-463D19.2	13	Breast-AdenoCA(3),Liver-HCC(2),Panc-AdenoCA(2),Bone-Osteosarc(1),Kidney-RCC(1),Prost-AdenoCA(1),Skin-Melanoma(1),Stomach-AdenoCA(1),Uterus-AdenoCA(1)
DISRUPTION	'RP11-729M20.1	13	Prost-AdenoCA(10),Breast-AdenoCA(2),Liver-HCC(1)
DISRUPTION	'RP11-774D14.1	13	SoftTissue-Liposarc(4),Bone-Osteosarc(2),Skin-Melanoma(2),Kidney-ChRCC(1),Lung-AdenoCA(1),Ovary-AdenoCA(1),Panc-AdenoCA(1),Uterus-AdenoCA(1)
DISRUPTION	'RPS6KA2	13	Ovary-AdenoCA(3),Breast-AdenoCA(2),Panc-AdenoCA(2),SoftTissue-Liposarc(2),Bone-Osteosarc(1),CNS-GBM(1),ColoRect-AdenoCA(1),Skin-Melanoma(1)
DISRUPTION	'RYR1	13	Eso-AdenoCA(2),Ovary-AdenoCA(2),Panc-AdenoCA(2),SoftTissue-Liposarc(2),Bone-Osteosarc(1),Breast-AdenoCA(1),CNS-GBM(1),Kidney-RCC(1),Lung-AdenoCA(1)
DISRUPTION	'SART3	13	Prost-AdenoCA(11),Breast-AdenoCA(1),ColoRect-AdenoCA(1)
DISRUPTION	'SBSPON	13	Prost-AdenoCA(9),Breast-AdenoCA(1),Liver-HCC(1),Skin-Melanoma(1),SoftTissue-Liposarc(1)
DISRUPTION	'SEC61A2	13	Prost-AdenoCA(9),Ovary-AdenoCA(2),Bone-Osteosarc(1),Breast-AdenoCA(1)
DISRUPTION	'SKAP1	13	Breast-AdenoCA(4),Ovary-AdenoCA(4),Uterus-AdenoCA(3),Panc-AdenoCA(2)
DISRUPTION	'SLC2A13	13	Breast-AdenoCA(4),SoftTissue-Liposarc(4),Liver-HCC(2),Kidney-RCC(1),Lymph-BNHL(1),Prost-AdenoCA(1)
DISRUPTION	'SNX27	13	Breast-AdenoCA(4),Biliary-AdenoCA(2),Ovary-AdenoCA(2),Bone-Osteosarc(1),Head-SCC(1),Panc-AdenoCA(1),SoftTissue-Liposarc(1),Uterus-AdenoCA(1)
DISRUPTION	'SOX9-AS1	13	Breast-AdenoCA(2),ColoRect-AdenoCA(2),Skin-Melanoma(2),Kidney-RCC(1),Liver-HCC(1),Lung-AdenoCA(1),Panc-AdenoCA(1),Prost-AdenoCA(1),SoftTissue-Liposarc(1),Uterus-AdenoCA(1)
DISRUPTION	'STARD3	13	Breast-AdenoCA(6),Eso-AdenoCA(3),Bladder-TCC(1),ColoRect-AdenoCA(1),Panc-AdenoCA(1),Stomach-AdenoCA(1)
DISRUPTION	'STX2	13	Prost-AdenoCA(9),Breast-AdenoCA(1),Eso-AdenoCA(1),Panc-AdenoCA(1),Skin-Melanoma(1)
DISRUPTION	'STX8	13	Breast-AdenoCA(2),Liver-HCC(2),Prost-AdenoCA(2),Bone-Osteosarc(1),ColoRect-AdenoCA(1),Kidney-RCC(1),Lung-AdenoCA(1),Ovary-AdenoCA(1),SoftTissue-Leiomyo(1),Stomach-AdenoCA(1)
DISRUPTION	'TAF4B	13	Panc-AdenoCA(3),Prost-AdenoCA(2),Bladder-TCC(1),Bone-Osteosarc(1),Breast-AdenoCA(1),Eso-AdenoCA(1),Liver-HCC(1),Lung-SCC(1),Skin-Melanoma(1),Uterus-AdenoCA(1)
DISRUPTION	'TASP1	13	Breast-AdenoCA(5),Ovary-AdenoCA(2),Stomach-AdenoCA(2),Panc-AdenoCA(1),Prost-AdenoCA(1),Skin-Melanoma(1),Uterus-AdenoCA(1)
DISRUPTION	'TBC1D30	13	SoftTissue-Liposarc(6),Panc-AdenoCA(2),Bone-Osteosarc(1),Eso-AdenoCA(1),Lung-AdenoCA(1),Lymph-BNHL(1),Stomach-AdenoCA(1)
DISRUPTION	'TGFBR2	13	Panc-AdenoCA(6),Eso-AdenoCA(2),Breast-AdenoCA(1),Kidney-ChRCC(1),SoftTissue-Liposarc(1),Stomach-AdenoCA(1),Uterus-AdenoCA(1)
DISRUPTION	'TMEM68	13	Prost-AdenoCA(8),Bone-Osteosarc(1),Breast-AdenoCA(1),Kidney-RCC(1),Skin-Melanoma(1),Stomach-AdenoCA(1)
DISRUPTION	'TPK1	13	Ovary-AdenoCA(3),Prost-AdenoCA(3),Skin-Melanoma(2),SoftTissue-Liposarc(2),Breast-AdenoCA(1),Head-SCC(1),Panc-AdenoCA(1)
DISRUPTION	'TPX2	13	Ovary-AdenoCA(3),Prost-AdenoCA(2),Stomach-AdenoCA(2),Breast-AdenoCA(1),Eso-AdenoCA(1),Head-SCC(1),Lymph-BNHL(1),Skin-Melanoma(1),SoftTissue-Liposarc(1)
DISRUPTION	'TRAF3	13	Head-SCC(4),SoftTissue-Liposarc(3),Biliary-AdenoCA(1),Eso-AdenoCA(1),Liver-HCC(1),Ovary-AdenoCA(1),Panc-AdenoCA(1),Stomach-AdenoCA(1)
DISRUPTION	'TRERF1	13	Breast-AdenoCA(3),Eso-AdenoCA(2),Liver-HCC(2),Stomach-AdenoCA(2),ColoRect-AdenoCA(1),Lung-AdenoCA(1),Lung-SCC(1),Ovary-AdenoCA(1)
DISRUPTION	'TTLL5	13	Panc-AdenoCA(2),Skin-Melanoma(2),SoftTissue-Liposarc(2),Biliary-AdenoCA(1),Liver-HCC(1),Lung-AdenoCA(1),Lung-SCC(1),Ovary-AdenoCA(1),Prost-AdenoCA(1),Uterus-AdenoCA(1)
DISRUPTION	'UBE2H	13	Prost-AdenoCA(5),Liver-HCC(2),Lung-AdenoCA(2),Lymph-BNHL(1),Panc-AdenoCA(1),SoftTissue-Liposarc(1),Uterus-AdenoCA(1)
DISRUPTION	'UBR2	13	Breast-AdenoCA(4),Eso-AdenoCA(2),Liver-HCC(2),Ovary-AdenoCA(2),Bone-Benign(1),Skin-Melanoma(1),SoftTissue-Liposarc(1)
DISRUPTION	'ULK4	13	Breast-AdenoCA(4),Bone-Osteosarc(2),Panc-AdenoCA(2),Stomach-AdenoCA(2),Liver-HCC(1),Prost-AdenoCA(1),Skin-Melanoma(1)
DISRUPTION	'UPK3B	13	Breast-AdenoCA(2),Ovary-AdenoCA(2),Stomach-AdenoCA(2),CNS-GBM(1),Eso-AdenoCA(1),Kidney-RCC(1),Panc-AdenoCA(1),Skin-Melanoma(1),SoftTissue-Liposarc(1),Uterus-AdenoCA(1)
DISRUPTION	'USP37	13	Stomach-AdenoCA(4),Liver-HCC(3),Uterus-AdenoCA(2),Breast-LobularCA(1),Kidney-RCC(1),Lung-SCC(1),Panc-AdenoCA(1)
DISRUPTION	'VWF	13	Ovary-AdenoCA(3),Breast-AdenoCA(2),Prost-AdenoCA(2),CNS-Medullo(1),Eso-AdenoCA(1),Lung-SCC(1),Skin-Melanoma(1),SoftTissue-Liposarc(1),Uterus-AdenoCA(1)
DISRUPTION	'WIF1	13	Prost-AdenoCA(4),Skin-Melanoma(3),SoftTissue-Liposarc(3),Liver-HCC(1),Panc-AdenoCA(1),Stomach-AdenoCA(1)
DISRUPTION	'WWTR1	13	Breast-AdenoCA(6),Liver-HCC(2),Lung-SCC(2),Prost-AdenoCA(2),Bone-Epith(1)
DISRUPTION	'ZDHHC11	13	SoftTissue-Liposarc(2),Bone-Epith(1),Bone-Osteosarc(1),Breast-AdenoCA(1),CNS-Medullo(1),Eso-AdenoCA(1),Kidney-ChRCC(1),Liver-HCC(1),Ovary-AdenoCA(1),Panc-AdenoCA(1),Prost-AdenoCA(1),Skin-Melanoma(1)
DISRUPTION	'ZFAND3	13	Liver-HCC(5),Breast-AdenoCA(2),CNS-GBM(1),Eso-AdenoCA(1),Head-SCC(1),Ovary-AdenoCA(1),SoftTissue-Liposarc(1),Uterus-AdenoCA(1)
DISRUPTION	'ZFAT	13	Breast-AdenoCA(2),Panc-AdenoCA(2),Bone-Osteosarc(1),Breast-LobularCA(1),Eso-AdenoCA(1),Head-SCC(1),Liver-HCC(1),Lymph-BNHL(1),Ovary-AdenoCA(1),Prost-AdenoCA(1),Skin-Melanoma(1)
DISRUPTION	'ZFHX4	13	Prost-AdenoCA(4),Breast-AdenoCA(3),Liver-HCC(1),Lung-AdenoCA(1),Ovary-AdenoCA(1),Panc-AdenoCA(1),Skin-Melanoma(1),Stomach-AdenoCA(1)
DISRUPTION	'ZNF365	13	Prost-AdenoCA(4),Breast-AdenoCA(2),Skin-Melanoma(2),Bladder-TCC(1),CNS-GBM(1),Lymph-BNHL(1),Panc-AdenoCA(1),Stomach-AdenoCA(1)
DISRUPTION	'ZNF804A	13	Breast-AdenoCA(3),Prost-AdenoCA(3),Lymph-BNHL(2),Panc-AdenoCA(2),Bladder-TCC(1),Skin-Melanoma(1),Stomach-AdenoCA(1)
DISRUPTION	'ZNRF2P2	13	Prost-AdenoCA(9),Bone-Osteosarc(1),Breast-AdenoCA(1),Kidney-ChRCC(1),Skin-Melanoma(1)
DISRUPTION	'ZRANB3	13	Panc-AdenoCA(3),Prost-AdenoCA(3),SoftTissue-Leiomyo(2),Breast-AdenoCA(1),Liver-HCC(1),Ovary-AdenoCA(1),SoftTissue-Liposarc(1),Uterus-AdenoCA(1)
EXON_SKIP	'DAB1	13	Breast-AdenoCA(3),Liver-HCC(2),Skin-Melanoma(2),Stomach-AdenoCA(2),Bladder-TCC(1),Cervix-SCC(1),Prost-AdenoCA(1),SoftTissue-Liposarc(1)
EXON_SKIP	'DSCAM	13	Prost-AdenoCA(10),Breast-AdenoCA(1),Breast-LobularCA(1),Lung-SCC(1)
EXON_SKIP	'ERBB4	13	Uterus-AdenoCA(3),Ovary-AdenoCA(2),Bone-Osteosarc(1),Breast-AdenoCA(1),ColoRect-AdenoCA(1),Kidney-ChRCC(1),Liver-HCC(1),Lung-SCC(1),Lymph-BNHL(1),Panc-AdenoCA(1)
EXON_SKIP	'HNF4G	13	Prost-AdenoCA(9),Liver-HCC(1),Skin-Melanoma(1),SoftTissue-Liposarc(1),Uterus-AdenoCA(1)
EXON_SKIP	'KIAA1217	13	Breast-AdenoCA(3),Uterus-AdenoCA(2),Cervix-SCC(1),Liver-HCC(1),Lung-SCC(1),Lymph-BNHL(1),Ovary-AdenoCA(1),Panc-AdenoCA(1),Skin-Melanoma(1),Stomach-AdenoCA(1)
EXON_SKIP	'MAGI1	13	Prost-AdenoCA(5),Breast-AdenoCA(2),CNS-GBM(1),CNS-Oligo(1),Head-SCC(1),Kidney-RCC(1),Ovary-AdenoCA(1),Stomach-AdenoCA(1)
EXON_SKIP	'PTPRN2	13	Stomach-AdenoCA(4),Eso-AdenoCA(3),CNS-GBM(1),ColoRect-AdenoCA(1),Lung-SCC(1),Lymph-BNHL(1),Panc-AdenoCA(1),Prost-AdenoCA(1)
EXON_SKIP	'STAG1	13	Liver-HCC(5),Eso-AdenoCA(2),Ovary-AdenoCA(2),Panc-AdenoCA(2),Biliary-AdenoCA(1),Uterus-AdenoCA(1)
ITD	'CNTN5	13	Prost-AdenoCA(5),Ovary-AdenoCA(4),Breast-AdenoCA(2),CNS-Medullo(1),Cervix-SCC(1)
ITD	'DLGAP1	13	Ovary-AdenoCA(2),Panc-AdenoCA(2),Uterus-AdenoCA(2),Bladder-TCC(1),Breast-AdenoCA(1),Eso-AdenoCA(1),Lung-SCC(1),Lymph-BNHL(1),Prost-AdenoCA(1),Stomach-AdenoCA(1)
ITD	'PTEN	13	Breast-AdenoCA(5),Ovary-AdenoCA(4),Prost-AdenoCA(2),Bone-Epith(1),Panc-AdenoCA(1)
DYSFUNCTIONAL_FUSION	'CDKN2A:CDKN2B-AS1	13	Liver-HCC(5),Lymph-BNHL(3),Lung-AdenoCA(1),NA(1),Panc-Endocrine(1),Skin-Melanoma(1),SoftTissue-Leiomyo(1)
DYSFUNCTIONAL_FUSION	'PTEN:RNLS	13	Prost-AdenoCA(5),CNS-GBM(2),Ovary-AdenoCA(2),Breast-AdenoCA(1),Liver-HCC(1),Lymph-BNHL(1),SoftTissue-Leiomyo(1)
FUSION_5	'ABCC3	13	Skin-Melanoma(6),Eso-AdenoCA(2),Stomach-AdenoCA(2),Breast-AdenoCA(1),Liver-HCC(1),Ovary-AdenoCA(1)
FUSION_5	'AC005307.3	13	Ovary-AdenoCA(4),Panc-AdenoCA(2),SoftTissue-Liposarc(2),Stomach-AdenoCA(2),Eso-AdenoCA(1),Lung-SCC(1),SoftTissue-Leiomyo(1)
FUSION_5	'AC025263.3	13	SoftTissue-Liposarc(7),Eso-AdenoCA(2),Skin-Melanoma(2),Bone-Osteosarc(1),Liver-HCC(1)
FUSION_5	'AC144521.1	13	Prost-AdenoCA(7),Stomach-AdenoCA(2),Biliary-AdenoCA(1),Breast-AdenoCA(1),Eso-AdenoCA(1),Lung-SCC(1)
FUSION_5	'AFF4	13	Prost-AdenoCA(10),CNS-Medullo(1),Lymph-CLL(1),Stomach-AdenoCA(1)
FUSION_5	'ALDH1A2	13	Bladder-TCC(4),Prost-AdenoCA(4),Stomach-AdenoCA(2),Kidney-ChRCC(1),Ovary-AdenoCA(1),Panc-AdenoCA(1)
FUSION_5	'AP000304.12	13	Breast-AdenoCA(5),Eso-AdenoCA(2),Kidney-RCC(2),Bladder-TCC(1),Head-SCC(1),Liver-HCC(1),Ovary-AdenoCA(1)
FUSION_5	'ASTN2	13	Breast-AdenoCA(6),Biliary-AdenoCA(2),Panc-Endocrine(2),CNS-GBM(1),Liver-HCC(1),Lung-AdenoCA(1)
FUSION_5	'BAI3	13	Skin-Melanoma(3),Biliary-AdenoCA(2),Panc-AdenoCA(2),Eso-AdenoCA(1),Head-SCC(1),Lung-SCC(1),Ovary-AdenoCA(1),Prost-AdenoCA(1),SoftTissue-Leiomyo(1)
FUSION_5	'BCKDHB	13	Prost-AdenoCA(12),Breast-AdenoCA(1)
FUSION_5	'BIRC6	13	SoftTissue-Liposarc(3),Eso-AdenoCA(2),Liver-HCC(2),Skin-Melanoma(2),Breast-AdenoCA(1),Lymph-BNHL(1),Ovary-AdenoCA(1),Stomach-AdenoCA(1)
FUSION_5	'BMPR1A	13	Prost-AdenoCA(11),Eso-AdenoCA(1),Panc-AdenoCA(1)
FUSION_5	'BRIP1	13	Breast-AdenoCA(4),Liver-HCC(3),Eso-AdenoCA(2),Panc-AdenoCA(1),Skin-Melanoma(1),SoftTissue-Liposarc(1),Stomach-AdenoCA(1)
FUSION_5	'CACNA1C	13	Breast-AdenoCA(6),Bone-Osteosarc(2),Ovary-AdenoCA(1),Panc-AdenoCA(1),SoftTissue-Leiomyo(1),SoftTissue-Liposarc(1),Uterus-AdenoCA(1)
FUSION_5	'CDH4	13	Breast-AdenoCA(6),Bladder-TCC(1),Bone-Osteosarc(1),Breast-DCIS(1),Liver-HCC(1),Ovary-AdenoCA(1),Panc-Endocrine(1),SoftTissue-Liposarc(1)
FUSION_5	'CHN2	13	CNS-GBM(4),Skin-Melanoma(4),Breast-AdenoCA(1),Lymph-BNHL(1),Ovary-AdenoCA(1),Prost-AdenoCA(1),Stomach-AdenoCA(1)
FUSION_5	'CPD	13	Breast-AdenoCA(3),Ovary-AdenoCA(3),Stomach-AdenoCA(3),Eso-AdenoCA(2),Lymph-BNHL(1),SoftTissue-Liposarc(1)
FUSION_5	'CTC-340A15.2	13	Breast-AdenoCA(2),Prost-AdenoCA(2),Biliary-AdenoCA(1),Bone-Osteosarc(1),CNS-GBM(1),Eso-AdenoCA(1),Kidney-RCC(1),Liver-HCC(1),Lymph-BNHL(1),Stomach-AdenoCA(1),Uterus-AdenoCA(1)
FUSION_5	'CTD-2337A12.1	13	Breast-AdenoCA(3),Liver-HCC(3),Panc-AdenoCA(2),Biliary-AdenoCA(1),Bladder-TCC(1),Bone-Osteosarc(1),Eso-AdenoCA(1),Prost-AdenoCA(1)
FUSION_5	'DHTKD1	13	Prost-AdenoCA(13)
FUSION_5	'DPP10	13	Prost-AdenoCA(5),Ovary-AdenoCA(3),Breast-AdenoCA(2),Biliary-AdenoCA(1),Eso-AdenoCA(1),Stomach-AdenoCA(1)
FUSION_5	'EGLN3	13	Liver-HCC(4),Breast-AdenoCA(2),SoftTissue-Liposarc(2),Biliary-AdenoCA(1),Eso-AdenoCA(1),Lung-AdenoCA(1),Skin-Melanoma(1),Stomach-AdenoCA(1)
FUSION_5	'EPB41L1	13	Stomach-AdenoCA(4),Bone-Osteosarc(2),Uterus-AdenoCA(2),Breast-AdenoCA(1),Head-SCC(1),Panc-AdenoCA(1),Prost-AdenoCA(1),SoftTissue-Liposarc(1)
FUSION_5	'EPS15L1	13	Stomach-AdenoCA(5),Breast-AdenoCA(4),Liver-HCC(3),Bone-Osteosarc(1)
FUSION_5	'FAM222B	13	Breast-AdenoCA(5),CNS-Medullo(2),Panc-AdenoCA(2),Eso-AdenoCA(1),Lung-SCC(1),Skin-Melanoma(1),Uterus-AdenoCA(1)
FUSION_5	'GRID1	13	Breast-AdenoCA(3),Skin-Melanoma(3),Liver-HCC(2),Ovary-AdenoCA(2),Lymph-BNHL(1),Panc-AdenoCA(1),Panc-Endocrine(1)
FUSION_5	'HDAC9	13	Prost-AdenoCA(3),Breast-AdenoCA(2),Lung-SCC(2),Skin-Melanoma(2),Bladder-TCC(1),Liver-HCC(1),Panc-AdenoCA(1),Thy-AdenoCA(1)
FUSION_5	'HELZ	13	Eso-AdenoCA(5),Breast-AdenoCA(3),Panc-AdenoCA(2),Bladder-TCC(1),Bone-Osteosarc(1),Uterus-AdenoCA(1)
FUSION_5	'IGKV2-29	13	Lymph-BNHL(11),Lymph-CLL(2)
FUSION_5	'INPP4A	13	Breast-AdenoCA(3),Bone-Osteosarc(2),Head-SCC(2),SoftTissue-Liposarc(2),Eso-AdenoCA(1),Ovary-AdenoCA(1),Prost-AdenoCA(1),Skin-Melanoma(1)
FUSION_5	'KALRN	13	Breast-AdenoCA(4),Prost-AdenoCA(2),SoftTissue-Liposarc(2),Uterus-AdenoCA(2),Kidney-ChRCC(1),Ovary-AdenoCA(1),Panc-AdenoCA(1)
FUSION_5	'KCNIP4	13	SoftTissue-Liposarc(5),CNS-Medullo(3),Breast-AdenoCA(1),CNS-GBM(1),Eso-AdenoCA(1),Lung-SCC(1),Ovary-AdenoCA(1)
FUSION_5	'KDM4B	13	Breast-AdenoCA(3),Liver-HCC(3),Stomach-AdenoCA(2),CNS-GBM(1),Lung-AdenoCA(1),Ovary-AdenoCA(1),Panc-AdenoCA(1),Prost-AdenoCA(1)
FUSION_5	'LINGO2	13	Panc-AdenoCA(5),Skin-Melanoma(3),Bone-Osteosarc(1),Eso-AdenoCA(1),Lung-SCC(1),SoftTissue-Leiomyo(1),Stomach-AdenoCA(1)
FUSION_5	'MARS	13	CNS-GBM(5),SoftTissue-Liposarc(3),Prost-AdenoCA(2),Bone-Osteosarc(1),Eso-AdenoCA(1),Stomach-AdenoCA(1)
FUSION_5	'MFSD4	13	Prost-AdenoCA(10),Breast-AdenoCA(1),Kidney-RCC(1),Skin-Melanoma(1)
FUSION_5	'MKL1	13	Skin-Melanoma(3),Biliary-AdenoCA(2),Breast-AdenoCA(2),Stomach-AdenoCA(2),Bone-Osteosarc(1),Head-SCC(1),Ovary-AdenoCA(1),Uterus-AdenoCA(1)
FUSION_5	'MSR1	13	Eso-AdenoCA(4),Liver-HCC(2),Panc-AdenoCA(2),Breast-AdenoCA(1),Lung-AdenoCA(1),Lung-SCC(1),Skin-Melanoma(1),SoftTissue-Liposarc(1)
FUSION_5	'MSTO1	13	Breast-AdenoCA(4),Liver-HCC(3),Biliary-AdenoCA(1),Eso-AdenoCA(1),Lung-SCC(1),Ovary-AdenoCA(1),SoftTissue-Liposarc(1),Uterus-AdenoCA(1)
FUSION_5	'MSTO2P	13	Breast-AdenoCA(4),Liver-HCC(3),Biliary-AdenoCA(1),Eso-AdenoCA(1),Lung-SCC(1),Ovary-AdenoCA(1),SoftTissue-Liposarc(1),Uterus-AdenoCA(1)
FUSION_5	'NCOR2	13	Liver-HCC(3),Prost-AdenoCA(3),Bone-Osteosarc(2),Eso-AdenoCA(1),Lung-SCC(1),Ovary-AdenoCA(1),Panc-AdenoCA(1),SoftTissue-Liposarc(1)
FUSION_5	'NEGR1	13	Bone-Osteosarc(2),Breast-AdenoCA(2),Panc-AdenoCA(2),CNS-GBM(1),Lymph-BNHL(1),Ovary-AdenoCA(1),Prost-AdenoCA(1),Skin-Melanoma(1),SoftTissue-Leiomyo(1),Stomach-AdenoCA(1)
FUSION_5	'NELL2	13	CNS-GBM(2),Liver-HCC(2),Panc-AdenoCA(2),Breast-AdenoCA(1),Lymph-BNHL(1),Ovary-AdenoCA(1),Panc-Endocrine(1),Prost-AdenoCA(1),SoftTissue-Liposarc(1),Stomach-AdenoCA(1)
FUSION_5	'PHF3	13	Prost-AdenoCA(5),Bone-Osteosarc(2),Ovary-AdenoCA(2),Panc-AdenoCA(2),Liver-HCC(1),Skin-Melanoma(1)
FUSION_5	'PPAP2A	13	Prost-AdenoCA(10),Head-SCC(1),Liver-HCC(1),Panc-AdenoCA(1)
FUSION_5	'PUM1	13	Breast-AdenoCA(3),Liver-HCC(2),Skin-Melanoma(2),Uterus-AdenoCA(2),CNS-GBM(1),Ovary-AdenoCA(1),Prost-AdenoCA(1),Stomach-AdenoCA(1)
FUSION_5	'RALYL	13	Breast-AdenoCA(3),Liver-HCC(2),Prost-AdenoCA(2),Skin-Melanoma(2),Lung-AdenoCA(1),Ovary-AdenoCA(1),Panc-AdenoCA(1),SoftTissue-Liposarc(1)
FUSION_5	'RP1-34H18.1	13	SoftTissue-Liposarc(8),Biliary-AdenoCA(1),Bladder-TCC(1),Bone-Osteosarc(1),Lung-SCC(1),Skin-Melanoma(1)
FUSION_5	'RP11-118B18.1	13	SoftTissue-Liposarc(5),Breast-AdenoCA(3),Liver-HCC(3),Skin-Melanoma(2)
FUSION_5	'RP11-192H23.4	13	Ovary-AdenoCA(3),Breast-AdenoCA(2),Panc-AdenoCA(2),Skin-Melanoma(2),Uterus-AdenoCA(2),ColoRect-AdenoCA(1),Eso-AdenoCA(1)
FUSION_5	'RP11-44K6.3	13	Prost-AdenoCA(7),Breast-AdenoCA(3),Bladder-TCC(1),Liver-HCC(1),Skin-Melanoma(1)
FUSION_5	'RP11-554D15.1	13	Prost-AdenoCA(5),Breast-AdenoCA(4),Bone-Osteosarc(3),Ovary-AdenoCA(1)
FUSION_5	'RPTOR	13	Uterus-AdenoCA(4),Prost-AdenoCA(3),Breast-AdenoCA(2),SoftTissue-Liposarc(2),Ovary-AdenoCA(1),Skin-Melanoma(1)
FUSION_5	'SETBP1	13	Prost-AdenoCA(6),Lung-SCC(3),Biliary-AdenoCA(1),Breast-AdenoCA(1),Ovary-AdenoCA(1),Panc-AdenoCA(1)
FUSION_5	'SIPA1L3	13	Ovary-AdenoCA(6),Panc-AdenoCA(3),Biliary-AdenoCA(1),Breast-AdenoCA(1),Skin-Melanoma(1),Stomach-AdenoCA(1)
FUSION_5	'SMAD4	13	Panc-AdenoCA(9),Prost-AdenoCA(2),Head-SCC(1),Stomach-AdenoCA(1)
FUSION_5	'SOX6	13	Breast-AdenoCA(3),SoftTissue-Liposarc(3),Panc-AdenoCA(2),CNS-Medullo(1),ColoRect-AdenoCA(1),Ovary-AdenoCA(1),Panc-Endocrine(1),Stomach-AdenoCA(1)
FUSION_5	'SPTA1	13	Prost-AdenoCA(9),SoftTissue-Liposarc(2),Biliary-AdenoCA(1),Breast-AdenoCA(1)
FUSION_5	'SSH2	13	Breast-AdenoCA(3),Bladder-TCC(2),Breast-DCIS(2),Liver-HCC(2),ColoRect-AdenoCA(1),Ovary-AdenoCA(1),Skin-Melanoma(1),SoftTissue-Liposarc(1)
FUSION_5	'SUZ12P	13	Breast-AdenoCA(5),Panc-AdenoCA(3),Breast-LobularCA(1),CNS-Medullo(1),Eso-AdenoCA(1),Liver-HCC(1),Skin-Melanoma(1)
FUSION_5	'TCF20	13	Bone-Osteosarc(4),Ovary-AdenoCA(2),Breast-AdenoCA(1),CNS-GBM(1),Liver-HCC(1),Lymph-BNHL(1),Panc-AdenoCA(1),Prost-AdenoCA(1),Uterus-AdenoCA(1)
FUSION_5	'THSD4	13	Uterus-AdenoCA(5),Breast-AdenoCA(3),Ovary-AdenoCA(3),Bone-Osteosarc(1),Kidney-ChRCC(1)
FUSION_5	'THSD7B	13	Prost-AdenoCA(10),Liver-HCC(1),Panc-AdenoCA(1),Skin-Melanoma(1)
FUSION_5	'TSHZ2	13	Breast-AdenoCA(3),Liver-HCC(2),Lung-AdenoCA(2),Stomach-AdenoCA(2),Bladder-TCC(1),CNS-Medullo(1),Ovary-AdenoCA(1),SoftTissue-Liposarc(1)
FUSION_5	'TSPAN9	13	Ovary-AdenoCA(4),Eso-AdenoCA(3),Breast-AdenoCA(2),Prost-AdenoCA(2),CNS-GBM(1),ColoRect-AdenoCA(1)
FUSION_5	'TYW1	13	Eso-AdenoCA(4),Stomach-AdenoCA(4),Prost-AdenoCA(3),Ovary-AdenoCA(1),Uterus-AdenoCA(1)
FUSION_5	'UNC13B	13	Liver-HCC(3),Panc-AdenoCA(3),Skin-Melanoma(2),Bladder-TCC(1),Lymph-BNHL(1),Ovary-AdenoCA(1),Prost-AdenoCA(1),Uterus-AdenoCA(1)
FUSION_5	'WBP1L	13	Prost-AdenoCA(10),Liver-HCC(2),Uterus-AdenoCA(1)
FUSION_3	'ACER3	13	Breast-AdenoCA(5),Panc-AdenoCA(3),Skin-Melanoma(3),Eso-AdenoCA(1),Stomach-AdenoCA(1)
FUSION_3	'ANO4	13	SoftTissue-Liposarc(8),Breast-AdenoCA(2),CNS-GBM(1),Liver-HCC(1),Panc-AdenoCA(1)
FUSION_3	'ARFGAP3	13	Prost-AdenoCA(4),Breast-AdenoCA(3),Eso-AdenoCA(1),Head-SCC(1),Liver-HCC(1),Lung-SCC(1),Ovary-AdenoCA(1),Panc-Endocrine(1)
FUSION_3	'ARHGAP42	13	Skin-Melanoma(4),Breast-AdenoCA(3),Eso-AdenoCA(3),Head-SCC(1),Ovary-AdenoCA(1),Prost-AdenoCA(1)
FUSION_3	'ATF6	13	Liver-HCC(5),SoftTissue-Liposarc(4),Breast-AdenoCA(2),Kidney-RCC(1),Lymph-BNHL(1)
FUSION_3	'ATP8B5P	13	Prost-AdenoCA(7),Bone-Osteosarc(1),Breast-AdenoCA(1),Liver-HCC(1),Ovary-AdenoCA(1),Skin-Melanoma(1),SoftTissue-Leiomyo(1)
FUSION_3	'BEST3	13	SoftTissue-Liposarc(10),Eso-AdenoCA(2),Bone-Osteosarc(1)
FUSION_3	'BRE	13	Ovary-AdenoCA(3),Uterus-AdenoCA(3),Eso-AdenoCA(2),Skin-Melanoma(2),Breast-AdenoCA(1),Panc-AdenoCA(1),SoftTissue-Liposarc(1)
FUSION_3	'C2CD3	13	Breast-AdenoCA(6),Skin-Melanoma(2),Bladder-TCC(1),Breast-LobularCA(1),Liver-HCC(1),Ovary-AdenoCA(1),Stomach-AdenoCA(1)
FUSION_3	'CCDC178	13	Biliary-AdenoCA(2),Lung-SCC(2),Ovary-AdenoCA(2),Panc-AdenoCA(2),Uterus-AdenoCA(2),Bladder-TCC(1),Breast-AdenoCA(1),SoftTissue-Liposarc(1)
FUSION_3	'CDH13	13	Breast-AdenoCA(5),Bone-Osteosarc(2),Lung-SCC(2),Panc-AdenoCA(2),Lung-AdenoCA(1),Prost-AdenoCA(1)
FUSION_3	'COL4A1	13	Prost-AdenoCA(9),Bone-Osteosarc(1),Breast-AdenoCA(1),Eso-AdenoCA(1),Ovary-AdenoCA(1)
FUSION_3	'DGKB	13	Skin-Melanoma(6),Prost-AdenoCA(2),Biliary-AdenoCA(1),Bladder-TCC(1),Breast-AdenoCA(1),Ovary-AdenoCA(1),SoftTissue-Liposarc(1)
FUSION_3	'FGD4	13	Breast-AdenoCA(3),Panc-AdenoCA(3),Liver-HCC(2),ColoRect-AdenoCA(1),Eso-AdenoCA(1),Lung-AdenoCA(1),Skin-Melanoma(1),Uterus-AdenoCA(1)
FUSION_3	'GPC6	13	Lymph-BNHL(3),Breast-AdenoCA(2),Panc-AdenoCA(2),Uterus-AdenoCA(2),Kidney-ChRCC(1),Liver-HCC(1),Lung-SCC(1),Ovary-AdenoCA(1)
FUSION_3	'GRIK4	13	Skin-Melanoma(6),Lymph-BNHL(3),Breast-AdenoCA(1),Lung-SCC(1),Panc-AdenoCA(1),SoftTissue-Liposarc(1)
FUSION_3	'HOOK2	13	Skin-Melanoma(3),Ovary-AdenoCA(2),SoftTissue-Leiomyo(2),Stomach-AdenoCA(2),Breast-AdenoCA(1),Lung-SCC(1),Lymph-BNHL(1),SoftTissue-Liposarc(1)
FUSION_3	'IGLJ3	13	Lymph-BNHL(8),Lymph-CLL(5)
FUSION_3	'ITGA3	13	Prost-AdenoCA(10),Breast-AdenoCA(2),Stomach-AdenoCA(1)
FUSION_3	'KCNIP1	13	Breast-AdenoCA(2),Eso-AdenoCA(2),Liver-HCC(2),Panc-AdenoCA(2),Prost-AdenoCA(2),Uterus-AdenoCA(2),Stomach-AdenoCA(1)
FUSION_3	'KCNMA1	13	Breast-AdenoCA(5),Liver-HCC(2),Ovary-AdenoCA(2),Breast-LobularCA(1),Eso-AdenoCA(1),Lung-SCC(1),Skin-Melanoma(1)
FUSION_3	'LIPE-AS1	13	CNS-GBM(5),Ovary-AdenoCA(2),Biliary-AdenoCA(1),Eso-AdenoCA(1),Lung-AdenoCA(1),Lymph-BNHL(1),Panc-AdenoCA(1),Prost-AdenoCA(1)
FUSION_3	'MAML2	13	Breast-AdenoCA(6),Panc-AdenoCA(2),Skin-Melanoma(2),CNS-Medullo(1),Eso-AdenoCA(1),Lung-SCC(1)
FUSION_3	'MAST4	13	Liver-HCC(5),Prost-AdenoCA(5),Breast-AdenoCA(2),Ovary-AdenoCA(1)
FUSION_3	'MECOM	13	Eso-AdenoCA(5),Breast-AdenoCA(1),Cervix-SCC(1),Liver-HCC(1),Lung-SCC(1),Ovary-AdenoCA(1),Prost-AdenoCA(1),Stomach-AdenoCA(1),Uterus-AdenoCA(1)
FUSION_3	'MYRIP	13	Prost-AdenoCA(12),Eso-AdenoCA(1)
FUSION_3	'NELL2	13	Bone-Osteosarc(2),Liver-HCC(2),Lung-SCC(2),Prost-AdenoCA(2),Breast-AdenoCA(1),CNS-GBM(1),Ovary-AdenoCA(1),Panc-AdenoCA(1),SoftTissue-Liposarc(1)
FUSION_3	'PAK1	13	Skin-Melanoma(8),Breast-AdenoCA(2),Ovary-AdenoCA(2),Lymph-CLL(1)
FUSION_3	'PBRM1	13	Eso-AdenoCA(3),Uterus-AdenoCA(3),Breast-AdenoCA(2),Stomach-AdenoCA(2),Ovary-AdenoCA(1),Panc-AdenoCA(1),Prost-AdenoCA(1)
FUSION_3	'PHF3	13	Prost-AdenoCA(5),Skin-Melanoma(4),Breast-AdenoCA(1),Liver-HCC(1),Ovary-AdenoCA(1),SoftTissue-Liposarc(1)
FUSION_3	'PITPNM2	13	Breast-AdenoCA(3),Ovary-AdenoCA(2),Panc-AdenoCA(2),Stomach-AdenoCA(2),ColoRect-AdenoCA(1),Head-SCC(1),Prost-AdenoCA(1),SoftTissue-Liposarc(1)
FUSION_3	'PLXNA4	13	Skin-Melanoma(6),SoftTissue-Liposarc(3),Breast-AdenoCA(1),CNS-GBM(1),Ovary-AdenoCA(1),Uterus-AdenoCA(1)
FUSION_3	'PPM1E	13	Breast-AdenoCA(7),CNS-Medullo(1),Liver-HCC(1),Lung-SCC(1),Ovary-AdenoCA(1),Prost-AdenoCA(1),Skin-Melanoma(1)
FUSION_3	'PTPRQ	13	Skin-Melanoma(7),SoftTissue-Liposarc(5),Lung-AdenoCA(1)
FUSION_3	'RAB11FIP4	13	Breast-AdenoCA(2),Skin-Melanoma(2),Uterus-AdenoCA(2),Bone-Osteosarc(1),CNS-GBM(1),ColoRect-AdenoCA(1),Head-SCC(1),Ovary-AdenoCA(1),Panc-AdenoCA(1),SoftTissue-Liposarc(1)
FUSION_3	'RERE	13	CNS-GBM(4),Liver-HCC(3),Prost-AdenoCA(2),Breast-LobularCA(1),Lymph-BNHL(1),Skin-Melanoma(1),Stomach-AdenoCA(1)
FUSION_3	'RIMS1	13	Breast-AdenoCA(5),Skin-Melanoma(2),Bone-Benign(1),Bone-Epith(1),ColoRect-AdenoCA(1),Lymph-BNHL(1),Lymph-CLL(1),Ovary-AdenoCA(1)
FUSION_3	'RP11-399D6.2	13	CNS-GBM(3),Stomach-AdenoCA(3),Liver-HCC(2),Panc-AdenoCA(2),Bladder-TCC(1),Bone-Osteosarc(1),Prost-AdenoCA(1)
FUSION_3	'RREB1	13	Skin-Melanoma(4),Breast-AdenoCA(3),Ovary-AdenoCA(2),Liver-HCC(1),Panc-AdenoCA(1),Prost-AdenoCA(1),Uterus-AdenoCA(1)
FUSION_3	'RYR2	13	Panc-AdenoCA(2),Skin-Melanoma(2),Biliary-AdenoCA(1),Breast-AdenoCA(1),CNS-GBM(1),Head-SCC(1),Liver-HCC(1),Panc-Endocrine(1),Prost-AdenoCA(1),SoftTissue-Liposarc(1),Stomach-AdenoCA(1)
FUSION_3	'SLC8A1-AS1	13	Prost-AdenoCA(9),Lung-SCC(2),Ovary-AdenoCA(1),Stomach-AdenoCA(1)
FUSION_3	'SOX6	13	SoftTissue-Liposarc(4),Panc-AdenoCA(2),Prost-AdenoCA(2),Breast-AdenoCA(1),Head-SCC(1),Ovary-AdenoCA(1),Skin-Melanoma(1),Stomach-AdenoCA(1)
FUSION_3	'TMEM132C	13	Bone-Osteosarc(7),SoftTissue-Leiomyo(4),Breast-AdenoCA(1),Ovary-AdenoCA(1)
FUSION_3	'USH2A	13	Prost-AdenoCA(3),Breast-LobularCA(2),CNS-GBM(2),Biliary-AdenoCA(1),Breast-AdenoCA(1),Kidney-RCC(1),Liver-HCC(1),Lung-SCC(1),Panc-AdenoCA(1)
FUSION_3	'WDFY4	13	Prost-AdenoCA(9),Bone-Osteosarc(1),Eso-AdenoCA(1),Ovary-AdenoCA(1),SoftTissue-Leiomyo(1)
FUSION_3	'WDR7	13	Panc-AdenoCA(3),Breast-AdenoCA(2),Liver-HCC(2),Biliary-AdenoCA(1),Eso-AdenoCA(1),Lymph-BNHL(1),Prost-AdenoCA(1),SoftTissue-Leiomyo(1),SoftTissue-Liposarc(1)
FUSION_3	'XRRA1	13	Breast-AdenoCA(5),Skin-Melanoma(5),Eso-AdenoCA(1),Liver-HCC(1),Ovary-AdenoCA(1)
FUSION_3	'ZNF236	13	Prost-AdenoCA(10),Panc-AdenoCA(2),Breast-AdenoCA(1)
DISRUPTION	'AC002066.1	12	Liver-HCC(2),Bone-Osteosarc(1),Breast-AdenoCA(1),Eso-AdenoCA(1),Kidney-RCC(1),Lung-SCC(1),Panc-AdenoCA(1),Panc-Endocrine(1),Prost-AdenoCA(1),SoftTissue-Liposarc(1),Stomach-AdenoCA(1)
DISRUPTION	'AC011524.1	12	Ovary-AdenoCA(4),Bone-Osteosarc(3),Stomach-AdenoCA(2),Biliary-AdenoCA(1),Breast-AdenoCA(1),Kidney-RCC(1)
DISRUPTION	'AC022153.1	12	Panc-AdenoCA(3),Stomach-AdenoCA(3),Ovary-AdenoCA(2),Bone-Osteosarc(1),Eso-AdenoCA(1),Lymph-BNHL(1),Skin-Melanoma(1)
DISRUPTION	'AC037445.1	12	Prost-AdenoCA(3),Breast-AdenoCA(2),Skin-Melanoma(2),SoftTissue-Liposarc(2),CNS-GBM(1),Eso-AdenoCA(1),Panc-AdenoCA(1)
DISRUPTION	'AC079613.1	12	Prost-AdenoCA(5),Eso-AdenoCA(2),Liver-HCC(2),Bone-Osteosarc(1),Head-SCC(1),Panc-AdenoCA(1)
DISRUPTION	'AC092594.1	12	Breast-AdenoCA(3),Liver-HCC(2),Stomach-AdenoCA(2),Cervix-SCC(1),ColoRect-AdenoCA(1),Head-SCC(1),Ovary-AdenoCA(1),Prost-AdenoCA(1)
DISRUPTION	'ACVR1B	12	Stomach-AdenoCA(4),Panc-AdenoCA(2),SoftTissue-Liposarc(2),Eso-AdenoCA(1),Lung-SCC(1),Ovary-AdenoCA(1),Prost-AdenoCA(1)
DISRUPTION	'ADAMTS2	12	Liver-HCC(3),Breast-AdenoCA(2),Bone-Osteosarc(1),Eso-AdenoCA(1),Ovary-AdenoCA(1),Panc-AdenoCA(1),Skin-Melanoma(1),SoftTissue-Liposarc(1),Uterus-AdenoCA(1)
DISRUPTION	'ADAMTS20	12	Panc-AdenoCA(2),SoftTissue-Liposarc(2),Biliary-AdenoCA(1),Eso-AdenoCA(1),Head-SCC(1),Liver-HCC(1),Ovary-AdenoCA(1),Prost-AdenoCA(1),Skin-Melanoma(1),Stomach-AdenoCA(1)
DISRUPTION	'ADAMTS3	12	Breast-AdenoCA(4),Liver-HCC(2),Bladder-TCC(1),Eso-AdenoCA(1),Ovary-AdenoCA(1),SoftTissue-Leiomyo(1),SoftTissue-Liposarc(1),Uterus-AdenoCA(1)
[truncated: 105,089 more rows]
